# Supplementary material for: Physiological and transcriptomic responses of Chlorella vulgaris to novel antibacterial nanoparticles of ethyl cyanoacrylate polymer
Source: Royal Society of Chemistry journal article supplement (doi:10.1039/d4en00861h), 2025-01-01
Supplement: d4en00861h1.xlsx [file d4en00861h1.xlsx]

## Sheet: Sheet1
GO.ID	Term	Ontology	Significant	Annotated	Pvalue	Qvalue	Signi_id	Signi_symbol
GO:0008144	drug binding	molecular function	40/200	73/592	6.6e-05	0.06402	TRINITY_DN1357_c0_g1(-2.55339730538),TRINITY_DN1427_c0_g1(-2.09599714025),TRINITY_DN1445_c0_g1(-3.12136795106),TRINITY_DN2301_c0_g1(2.37287805567),TRINITY_DN2507_c1_g1(-2.42187704794),TRINITY_DN2618_c2_g3(1.16746035949),TRINITY_DN2677_c1_g2(1.75084897723),TRINITY_DN2713_c2_g2(-1.10006926738),TRINITY_DN2713_c2_g4(-1.53848907314),TRINITY_DN2727_c2_g2(2.80700894859),TRINITY_DN2783_c0_g1(-2.279416901…	TRINITY_DN1357_c0_g1(-2.55339730538),TRINITY_DN1427_c0_g1(-2.09599714025),TRINITY_DN1445_c0_g1(-3.12136795106),TRINITY_DN2301_c0_g1(2.37287805567),TRINITY_DN2507_c1_g1(-2.42187704794),TRINITY_DN2618_c2_g3(1.16746035949),TRINITY_DN2677_c1_g2(1.75084897723),TRINITY_DN2713_c2_g2(-1.10006926738),TRINITY_DN2713_c2_g4(-1.53848907314),TRINITY_DN2727_c2_g2(2.80700894859),TRINITY_DN2783_c0_g1(-2.279416901…
GO:0004568	chitinase activity	molecular function	20/200	31/592	0.00032	0.1552	TRINITY_DN1427_c0_g1(-2.09599714025),TRINITY_DN1445_c0_g1(-3.12136795106),TRINITY_DN2301_c0_g1(2.37287805567),TRINITY_DN2713_c2_g2(-1.10006926738),TRINITY_DN2713_c2_g4(-1.53848907314),TRINITY_DN2783_c0_g1(-2.27941690147),TRINITY_DN2783_c1_g1(-1.61743360107),TRINITY_DN2783_c1_g3(-1.17043571323),TRINITY_DN2900_c1_g1(-1.38359344469),TRINITY_DN2900_c3_g2(-1.41745704852),TRINITY_DN2900_c3_g4(-7.082567…	TRINITY_DN1427_c0_g1(-2.09599714025),TRINITY_DN1445_c0_g1(-3.12136795106),TRINITY_DN2301_c0_g1(2.37287805567),TRINITY_DN2713_c2_g2(-1.10006926738),TRINITY_DN2713_c2_g4(-1.53848907314),TRINITY_DN2783_c0_g1(-2.27941690147),TRINITY_DN2783_c1_g1(-1.61743360107),TRINITY_DN2783_c1_g3(-1.17043571323),TRINITY_DN2900_c1_g1(-1.38359344469),TRINITY_DN2900_c3_g2(-1.41745704852),TRINITY_DN2900_c3_g4(-7.082567…
GO:0008061	chitin binding	molecular function	21/200	34/592	0.00055	0.177833	TRINITY_DN1427_c0_g1(-2.09599714025),TRINITY_DN1445_c0_g1(-3.12136795106),TRINITY_DN2301_c0_g1(2.37287805567),TRINITY_DN2713_c2_g2(-1.10006926738),TRINITY_DN2713_c2_g4(-1.53848907314),TRINITY_DN2727_c2_g2(2.80700894859),TRINITY_DN2783_c0_g1(-2.27941690147),TRINITY_DN2783_c1_g1(-1.61743360107),TRINITY_DN2783_c1_g3(-1.17043571323),TRINITY_DN2900_c1_g1(-1.38359344469),TRINITY_DN2900_c3_g2(-1.4174570…	TRINITY_DN1427_c0_g1(-2.09599714025),TRINITY_DN1445_c0_g1(-3.12136795106),TRINITY_DN2301_c0_g1(2.37287805567),TRINITY_DN2713_c2_g2(-1.10006926738),TRINITY_DN2713_c2_g4(-1.53848907314),TRINITY_DN2727_c2_g2(2.80700894859),TRINITY_DN2783_c0_g1(-2.27941690147),TRINITY_DN2783_c1_g1(-1.61743360107),TRINITY_DN2783_c1_g3(-1.17043571323),TRINITY_DN2900_c1_g1(-1.38359344469),TRINITY_DN2900_c3_g2(-1.4174570…
GO:0006040	amino sugar metabolic process	biological process	21/234	32/681	0.00022	0.23738	TRINITY_DN1427_c0_g1(-2.09599714025),TRINITY_DN1445_c0_g1(-3.12136795106),TRINITY_DN2301_c0_g1(2.37287805567),TRINITY_DN2610_c4_g1(-1.54090835941),TRINITY_DN2713_c2_g2(-1.10006926738),TRINITY_DN2713_c2_g4(-1.53848907314),TRINITY_DN2783_c0_g1(-2.27941690147),TRINITY_DN2783_c1_g1(-1.61743360107),TRINITY_DN2783_c1_g3(-1.17043571323),TRINITY_DN2900_c1_g1(-1.38359344469),TRINITY_DN2900_c3_g2(-1.417457…	TRINITY_DN1427_c0_g1(-2.09599714025),TRINITY_DN1445_c0_g1(-3.12136795106),TRINITY_DN2301_c0_g1(2.37287805567),TRINITY_DN2610_c4_g1(-1.54090835941),TRINITY_DN2713_c2_g2(-1.10006926738),TRINITY_DN2713_c2_g4(-1.53848907314),TRINITY_DN2783_c0_g1(-2.27941690147),TRINITY_DN2783_c1_g1(-1.61743360107),TRINITY_DN2783_c1_g3(-1.17043571323),TRINITY_DN2900_c1_g1(-1.38359344469),TRINITY_DN2900_c3_g2(-1.417457…
GO:0046348	amino sugar catabolic process	biological process	21/234	32/681	0.00022	0.23738	TRINITY_DN1427_c0_g1(-2.09599714025),TRINITY_DN1445_c0_g1(-3.12136795106),TRINITY_DN2301_c0_g1(2.37287805567),TRINITY_DN2610_c4_g1(-1.54090835941),TRINITY_DN2713_c2_g2(-1.10006926738),TRINITY_DN2713_c2_g4(-1.53848907314),TRINITY_DN2783_c0_g1(-2.27941690147),TRINITY_DN2783_c1_g1(-1.61743360107),TRINITY_DN2783_c1_g3(-1.17043571323),TRINITY_DN2900_c1_g1(-1.38359344469),TRINITY_DN2900_c3_g2(-1.417457…	TRINITY_DN1427_c0_g1(-2.09599714025),TRINITY_DN1445_c0_g1(-3.12136795106),TRINITY_DN2301_c0_g1(2.37287805567),TRINITY_DN2610_c4_g1(-1.54090835941),TRINITY_DN2713_c2_g2(-1.10006926738),TRINITY_DN2713_c2_g4(-1.53848907314),TRINITY_DN2783_c0_g1(-2.27941690147),TRINITY_DN2783_c1_g1(-1.61743360107),TRINITY_DN2783_c1_g3(-1.17043571323),TRINITY_DN2900_c1_g1(-1.38359344469),TRINITY_DN2900_c3_g2(-1.417457…
GO:1901071	glucosamine-containing compound metabolic process	biological process	21/234	32/681	0.00022	0.23738	TRINITY_DN1427_c0_g1(-2.09599714025),TRINITY_DN1445_c0_g1(-3.12136795106),TRINITY_DN2301_c0_g1(2.37287805567),TRINITY_DN2610_c4_g1(-1.54090835941),TRINITY_DN2713_c2_g2(-1.10006926738),TRINITY_DN2713_c2_g4(-1.53848907314),TRINITY_DN2783_c0_g1(-2.27941690147),TRINITY_DN2783_c1_g1(-1.61743360107),TRINITY_DN2783_c1_g3(-1.17043571323),TRINITY_DN2900_c1_g1(-1.38359344469),TRINITY_DN2900_c3_g2(-1.417457…	TRINITY_DN1427_c0_g1(-2.09599714025),TRINITY_DN1445_c0_g1(-3.12136795106),TRINITY_DN2301_c0_g1(2.37287805567),TRINITY_DN2610_c4_g1(-1.54090835941),TRINITY_DN2713_c2_g2(-1.10006926738),TRINITY_DN2713_c2_g4(-1.53848907314),TRINITY_DN2783_c0_g1(-2.27941690147),TRINITY_DN2783_c1_g1(-1.61743360107),TRINITY_DN2783_c1_g3(-1.17043571323),TRINITY_DN2900_c1_g1(-1.38359344469),TRINITY_DN2900_c3_g2(-1.417457…
GO:1901072	glucosamine-containing compound catabolic process	biological process	21/234	32/681	0.00022	0.23738	TRINITY_DN1427_c0_g1(-2.09599714025),TRINITY_DN1445_c0_g1(-3.12136795106),TRINITY_DN2301_c0_g1(2.37287805567),TRINITY_DN2610_c4_g1(-1.54090835941),TRINITY_DN2713_c2_g2(-1.10006926738),TRINITY_DN2713_c2_g4(-1.53848907314),TRINITY_DN2783_c0_g1(-2.27941690147),TRINITY_DN2783_c1_g1(-1.61743360107),TRINITY_DN2783_c1_g3(-1.17043571323),TRINITY_DN2900_c1_g1(-1.38359344469),TRINITY_DN2900_c3_g2(-1.417457…	TRINITY_DN1427_c0_g1(-2.09599714025),TRINITY_DN1445_c0_g1(-3.12136795106),TRINITY_DN2301_c0_g1(2.37287805567),TRINITY_DN2610_c4_g1(-1.54090835941),TRINITY_DN2713_c2_g2(-1.10006926738),TRINITY_DN2713_c2_g4(-1.53848907314),TRINITY_DN2783_c0_g1(-2.27941690147),TRINITY_DN2783_c1_g1(-1.61743360107),TRINITY_DN2783_c1_g3(-1.17043571323),TRINITY_DN2900_c1_g1(-1.38359344469),TRINITY_DN2900_c3_g2(-1.417457…
GO:1901136	carbohydrate derivative catabolic process	biological process	23/234	37/681	0.00036	0.23738	TRINITY_DN1427_c0_g1(-2.09599714025),TRINITY_DN1445_c0_g1(-3.12136795106),TRINITY_DN2301_c0_g1(2.37287805567),TRINITY_DN2610_c4_g1(-1.54090835941),TRINITY_DN2713_c2_g2(-1.10006926738),TRINITY_DN2713_c2_g4(-1.53848907314),TRINITY_DN2783_c0_g1(-2.27941690147),TRINITY_DN2783_c1_g1(-1.61743360107),TRINITY_DN2783_c1_g3(-1.17043571323),TRINITY_DN2900_c1_g1(-1.38359344469),TRINITY_DN2900_c3_g2(-1.417457…	TRINITY_DN1427_c0_g1(-2.09599714025),TRINITY_DN1445_c0_g1(-3.12136795106),TRINITY_DN2301_c0_g1(2.37287805567),TRINITY_DN2610_c4_g1(-1.54090835941),TRINITY_DN2713_c2_g2(-1.10006926738),TRINITY_DN2713_c2_g4(-1.53848907314),TRINITY_DN2783_c0_g1(-2.27941690147),TRINITY_DN2783_c1_g1(-1.61743360107),TRINITY_DN2783_c1_g3(-1.17043571323),TRINITY_DN2900_c1_g1(-1.38359344469),TRINITY_DN2900_c3_g2(-1.417457…
GO:0006026	aminoglycan catabolic process	biological process	20/234	31/681	0.00044	0.23738	TRINITY_DN1427_c0_g1(-2.09599714025),TRINITY_DN1445_c0_g1(-3.12136795106),TRINITY_DN2301_c0_g1(2.37287805567),TRINITY_DN2713_c2_g2(-1.10006926738),TRINITY_DN2713_c2_g4(-1.53848907314),TRINITY_DN2783_c0_g1(-2.27941690147),TRINITY_DN2783_c1_g1(-1.61743360107),TRINITY_DN2783_c1_g3(-1.17043571323),TRINITY_DN2900_c1_g1(-1.38359344469),TRINITY_DN2900_c3_g2(-1.41745704852),TRINITY_DN2900_c3_g4(-7.082567…	TRINITY_DN1427_c0_g1(-2.09599714025),TRINITY_DN1445_c0_g1(-3.12136795106),TRINITY_DN2301_c0_g1(2.37287805567),TRINITY_DN2713_c2_g2(-1.10006926738),TRINITY_DN2713_c2_g4(-1.53848907314),TRINITY_DN2783_c0_g1(-2.27941690147),TRINITY_DN2783_c1_g1(-1.61743360107),TRINITY_DN2783_c1_g3(-1.17043571323),TRINITY_DN2900_c1_g1(-1.38359344469),TRINITY_DN2900_c3_g2(-1.41745704852),TRINITY_DN2900_c3_g4(-7.082567…
GO:0006030	chitin metabolic process	biological process	20/234	31/681	0.00044	0.23738	TRINITY_DN1427_c0_g1(-2.09599714025),TRINITY_DN1445_c0_g1(-3.12136795106),TRINITY_DN2301_c0_g1(2.37287805567),TRINITY_DN2713_c2_g2(-1.10006926738),TRINITY_DN2713_c2_g4(-1.53848907314),TRINITY_DN2783_c0_g1(-2.27941690147),TRINITY_DN2783_c1_g1(-1.61743360107),TRINITY_DN2783_c1_g3(-1.17043571323),TRINITY_DN2900_c1_g1(-1.38359344469),TRINITY_DN2900_c3_g2(-1.41745704852),TRINITY_DN2900_c3_g4(-7.082567…	TRINITY_DN1427_c0_g1(-2.09599714025),TRINITY_DN1445_c0_g1(-3.12136795106),TRINITY_DN2301_c0_g1(2.37287805567),TRINITY_DN2713_c2_g2(-1.10006926738),TRINITY_DN2713_c2_g4(-1.53848907314),TRINITY_DN2783_c0_g1(-2.27941690147),TRINITY_DN2783_c1_g1(-1.61743360107),TRINITY_DN2783_c1_g3(-1.17043571323),TRINITY_DN2900_c1_g1(-1.38359344469),TRINITY_DN2900_c3_g2(-1.41745704852),TRINITY_DN2900_c3_g4(-7.082567…
GO:0006032	chitin catabolic process	biological process	20/234	31/681	0.00044	0.23738	TRINITY_DN1427_c0_g1(-2.09599714025),TRINITY_DN1445_c0_g1(-3.12136795106),TRINITY_DN2301_c0_g1(2.37287805567),TRINITY_DN2713_c2_g2(-1.10006926738),TRINITY_DN2713_c2_g4(-1.53848907314),TRINITY_DN2783_c0_g1(-2.27941690147),TRINITY_DN2783_c1_g1(-1.61743360107),TRINITY_DN2783_c1_g3(-1.17043571323),TRINITY_DN2900_c1_g1(-1.38359344469),TRINITY_DN2900_c3_g2(-1.41745704852),TRINITY_DN2900_c3_g4(-7.082567…	TRINITY_DN1427_c0_g1(-2.09599714025),TRINITY_DN1445_c0_g1(-3.12136795106),TRINITY_DN2301_c0_g1(2.37287805567),TRINITY_DN2713_c2_g2(-1.10006926738),TRINITY_DN2713_c2_g4(-1.53848907314),TRINITY_DN2783_c0_g1(-2.27941690147),TRINITY_DN2783_c1_g1(-1.61743360107),TRINITY_DN2783_c1_g3(-1.17043571323),TRINITY_DN2900_c1_g1(-1.38359344469),TRINITY_DN2900_c3_g2(-1.41745704852),TRINITY_DN2900_c3_g4(-7.082567…
GO:0016811	hydrolase activity, acting on carbon-nitrogen (but not peptide) bonds, in linear amides	molecular function	14/200	21/592	0.00177	0.292386	TRINITY_DN1267_c0_g1(-3.74317437745),TRINITY_DN1427_c0_g1(-2.09599714025),TRINITY_DN2301_c0_g1(2.37287805567),TRINITY_DN2713_c2_g2(-1.10006926738),TRINITY_DN2713_c2_g4(-1.53848907314),TRINITY_DN2900_c1_g1(-1.38359344469),TRINITY_DN2900_c3_g2(-1.41745704852),TRINITY_DN2900_c3_g4(-7.08256753966),TRINITY_DN3105_c1_g2(-2.52751539969),TRINITY_DN3351_c3_g1(2.37978701602),TRINITY_DN3380_c1_g1(1.89660882…	TRINITY_DN1267_c0_g1(-3.74317437745),TRINITY_DN1427_c0_g1(-2.09599714025),TRINITY_DN2301_c0_g1(2.37287805567),TRINITY_DN2713_c2_g2(-1.10006926738),TRINITY_DN2713_c2_g4(-1.53848907314),TRINITY_DN2900_c1_g1(-1.38359344469),TRINITY_DN2900_c3_g2(-1.41745704852),TRINITY_DN2900_c3_g4(-7.08256753966),TRINITY_DN3105_c1_g2(-2.52751539969),TRINITY_DN3351_c3_g1(2.37978701602),TRINITY_DN3380_c1_g1(1.89660882…
GO:0019213	deacetylase activity	molecular function	13/200	19/592	0.00184	0.292386	TRINITY_DN1267_c0_g1(-3.74317437745),TRINITY_DN1427_c0_g1(-2.09599714025),TRINITY_DN2301_c0_g1(2.37287805567),TRINITY_DN2713_c2_g2(-1.10006926738),TRINITY_DN2713_c2_g4(-1.53848907314),TRINITY_DN2900_c1_g1(-1.38359344469),TRINITY_DN2900_c3_g2(-1.41745704852),TRINITY_DN2900_c3_g4(-7.08256753966),TRINITY_DN3105_c1_g2(-2.52751539969),TRINITY_DN3351_c3_g1(2.37978701602),TRINITY_DN3380_c1_g1(1.89660882…	TRINITY_DN1267_c0_g1(-3.74317437745),TRINITY_DN1427_c0_g1(-2.09599714025),TRINITY_DN2301_c0_g1(2.37287805567),TRINITY_DN2713_c2_g2(-1.10006926738),TRINITY_DN2713_c2_g4(-1.53848907314),TRINITY_DN2900_c1_g1(-1.38359344469),TRINITY_DN2900_c3_g2(-1.41745704852),TRINITY_DN2900_c3_g4(-7.08256753966),TRINITY_DN3105_c1_g2(-2.52751539969),TRINITY_DN3351_c3_g1(2.37978701602),TRINITY_DN3380_c1_g1(1.89660882…
GO:0004099	chitin deacetylase activity	molecular function	12/200	17/592	0.00186	0.292386	TRINITY_DN1427_c0_g1(-2.09599714025),TRINITY_DN2301_c0_g1(2.37287805567),TRINITY_DN2713_c2_g2(-1.10006926738),TRINITY_DN2713_c2_g4(-1.53848907314),TRINITY_DN2900_c1_g1(-1.38359344469),TRINITY_DN2900_c3_g2(-1.41745704852),TRINITY_DN2900_c3_g4(-7.08256753966),TRINITY_DN3105_c1_g2(-2.52751539969),TRINITY_DN3351_c3_g1(2.37978701602),TRINITY_DN3380_c1_g1(1.89660882288),TRINITY_DN3586_c0_g2(-2.01530678…	TRINITY_DN1427_c0_g1(-2.09599714025),TRINITY_DN2301_c0_g1(2.37287805567),TRINITY_DN2713_c2_g2(-1.10006926738),TRINITY_DN2713_c2_g4(-1.53848907314),TRINITY_DN2900_c1_g1(-1.38359344469),TRINITY_DN2900_c3_g2(-1.41745704852),TRINITY_DN2900_c3_g4(-7.08256753966),TRINITY_DN3105_c1_g2(-2.52751539969),TRINITY_DN3351_c3_g1(2.37978701602),TRINITY_DN3380_c1_g1(1.89660882288),TRINITY_DN3586_c0_g2(-2.01530678…
GO:0097367	carbohydrate derivative binding	molecular function	39/200	80/592	0.00211	0.292386	TRINITY_DN1357_c0_g1(-2.55339730538),TRINITY_DN1427_c0_g1(-2.09599714025),TRINITY_DN1445_c0_g1(-3.12136795106),TRINITY_DN2301_c0_g1(2.37287805567),TRINITY_DN2507_c1_g1(-2.42187704794),TRINITY_DN2618_c2_g3(1.16746035949),TRINITY_DN2677_c1_g2(1.75084897723),TRINITY_DN2713_c2_g2(-1.10006926738),TRINITY_DN2713_c2_g4(-1.53848907314),TRINITY_DN2727_c2_g2(2.80700894859),TRINITY_DN2783_c0_g1(-2.279416901…	TRINITY_DN1357_c0_g1(-2.55339730538),TRINITY_DN1427_c0_g1(-2.09599714025),TRINITY_DN1445_c0_g1(-3.12136795106),TRINITY_DN2301_c0_g1(2.37287805567),TRINITY_DN2507_c1_g1(-2.42187704794),TRINITY_DN2618_c2_g3(1.16746035949),TRINITY_DN2677_c1_g2(1.75084897723),TRINITY_DN2713_c2_g2(-1.10006926738),TRINITY_DN2713_c2_g4(-1.53848907314),TRINITY_DN2727_c2_g2(2.80700894859),TRINITY_DN2783_c0_g1(-2.279416901…
GO:0006022	aminoglycan metabolic process	biological process	20/234	32/681	0.00081	0.38844	TRINITY_DN1427_c0_g1(-2.09599714025),TRINITY_DN1445_c0_g1(-3.12136795106),TRINITY_DN2301_c0_g1(2.37287805567),TRINITY_DN2713_c2_g2(-1.10006926738),TRINITY_DN2713_c2_g4(-1.53848907314),TRINITY_DN2783_c0_g1(-2.27941690147),TRINITY_DN2783_c1_g1(-1.61743360107),TRINITY_DN2783_c1_g3(-1.17043571323),TRINITY_DN2900_c1_g1(-1.38359344469),TRINITY_DN2900_c3_g2(-1.41745704852),TRINITY_DN2900_c3_g4(-7.082567…	TRINITY_DN1427_c0_g1(-2.09599714025),TRINITY_DN1445_c0_g1(-3.12136795106),TRINITY_DN2301_c0_g1(2.37287805567),TRINITY_DN2713_c2_g2(-1.10006926738),TRINITY_DN2713_c2_g4(-1.53848907314),TRINITY_DN2783_c0_g1(-2.27941690147),TRINITY_DN2783_c1_g1(-1.61743360107),TRINITY_DN2783_c1_g3(-1.17043571323),TRINITY_DN2900_c1_g1(-1.38359344469),TRINITY_DN2900_c3_g2(-1.41745704852),TRINITY_DN2900_c3_g4(-7.082567…
GO:0016810	hydrolase activity, acting on carbon-nitrogen (but not peptide) bonds	molecular function	14/200	22/592	0.00342	0.414675	TRINITY_DN1267_c0_g1(-3.74317437745),TRINITY_DN1427_c0_g1(-2.09599714025),TRINITY_DN2301_c0_g1(2.37287805567),TRINITY_DN2713_c2_g2(-1.10006926738),TRINITY_DN2713_c2_g4(-1.53848907314),TRINITY_DN2900_c1_g1(-1.38359344469),TRINITY_DN2900_c3_g2(-1.41745704852),TRINITY_DN2900_c3_g4(-7.08256753966),TRINITY_DN3105_c1_g2(-2.52751539969),TRINITY_DN3351_c3_g1(2.37978701602),TRINITY_DN3380_c1_g1(1.89660882…	TRINITY_DN1267_c0_g1(-3.74317437745),TRINITY_DN1427_c0_g1(-2.09599714025),TRINITY_DN2301_c0_g1(2.37287805567),TRINITY_DN2713_c2_g2(-1.10006926738),TRINITY_DN2713_c2_g4(-1.53848907314),TRINITY_DN2900_c1_g1(-1.38359344469),TRINITY_DN2900_c3_g2(-1.41745704852),TRINITY_DN2900_c3_g4(-7.08256753966),TRINITY_DN3105_c1_g2(-2.52751539969),TRINITY_DN3351_c3_g1(2.37978701602),TRINITY_DN3380_c1_g1(1.89660882…
GO:0016798	hydrolase activity, acting on glycosyl bonds	molecular function	24/200	45/592	0.00394	0.424644	TRINITY_DN1427_c0_g1(-2.09599714025),TRINITY_DN1445_c0_g1(-3.12136795106),TRINITY_DN2301_c0_g1(2.37287805567),TRINITY_DN2713_c2_g2(-1.10006926738),TRINITY_DN2713_c2_g4(-1.53848907314),TRINITY_DN2783_c0_g1(-2.27941690147),TRINITY_DN2783_c1_g1(-1.61743360107),TRINITY_DN2783_c1_g3(-1.17043571323),TRINITY_DN2900_c1_g1(-1.38359344469),TRINITY_DN2900_c3_g2(-1.41745704852),TRINITY_DN2900_c3_g4(-7.082567…	TRINITY_DN1427_c0_g1(-2.09599714025),TRINITY_DN1445_c0_g1(-3.12136795106),TRINITY_DN2301_c0_g1(2.37287805567),TRINITY_DN2713_c2_g2(-1.10006926738),TRINITY_DN2713_c2_g4(-1.53848907314),TRINITY_DN2783_c0_g1(-2.27941690147),TRINITY_DN2783_c1_g1(-1.61743360107),TRINITY_DN2783_c1_g3(-1.17043571323),TRINITY_DN2900_c1_g1(-1.38359344469),TRINITY_DN2900_c3_g2(-1.41745704852),TRINITY_DN2900_c3_g4(-7.082567…
GO:0042737	drug catabolic process	biological process	20/234	33/681	0.00143	0.617188	TRINITY_DN1427_c0_g1(-2.09599714025),TRINITY_DN1445_c0_g1(-3.12136795106),TRINITY_DN2301_c0_g1(2.37287805567),TRINITY_DN2713_c2_g2(-1.10006926738),TRINITY_DN2713_c2_g4(-1.53848907314),TRINITY_DN2783_c0_g1(-2.27941690147),TRINITY_DN2783_c1_g1(-1.61743360107),TRINITY_DN2783_c1_g3(-1.17043571323),TRINITY_DN2900_c1_g1(-1.38359344469),TRINITY_DN2900_c3_g2(-1.41745704852),TRINITY_DN2900_c3_g4(-7.082567…	TRINITY_DN1427_c0_g1(-2.09599714025),TRINITY_DN1445_c0_g1(-3.12136795106),TRINITY_DN2301_c0_g1(2.37287805567),TRINITY_DN2713_c2_g2(-1.10006926738),TRINITY_DN2713_c2_g4(-1.53848907314),TRINITY_DN2783_c0_g1(-2.27941690147),TRINITY_DN2783_c1_g1(-1.61743360107),TRINITY_DN2783_c1_g3(-1.17043571323),TRINITY_DN2900_c1_g1(-1.38359344469),TRINITY_DN2900_c3_g2(-1.41745704852),TRINITY_DN2900_c3_g4(-7.082567…
GO:0004553	hydrolase activity, hydrolyzing O-glycosyl compounds	molecular function	23/200	44/592	0.00669	0.64893	TRINITY_DN1427_c0_g1(-2.09599714025),TRINITY_DN1445_c0_g1(-3.12136795106),TRINITY_DN2301_c0_g1(2.37287805567),TRINITY_DN2713_c2_g2(-1.10006926738),TRINITY_DN2713_c2_g4(-1.53848907314),TRINITY_DN2783_c0_g1(-2.27941690147),TRINITY_DN2783_c1_g1(-1.61743360107),TRINITY_DN2783_c1_g3(-1.17043571323),TRINITY_DN2900_c1_g1(-1.38359344469),TRINITY_DN2900_c3_g2(-1.41745704852),TRINITY_DN2900_c3_g4(-7.082567…	TRINITY_DN1427_c0_g1(-2.09599714025),TRINITY_DN1445_c0_g1(-3.12136795106),TRINITY_DN2301_c0_g1(2.37287805567),TRINITY_DN2713_c2_g2(-1.10006926738),TRINITY_DN2713_c2_g4(-1.53848907314),TRINITY_DN2783_c0_g1(-2.27941690147),TRINITY_DN2783_c1_g1(-1.61743360107),TRINITY_DN2783_c1_g3(-1.17043571323),TRINITY_DN2900_c1_g1(-1.38359344469),TRINITY_DN2900_c3_g2(-1.41745704852),TRINITY_DN2900_c3_g4(-7.082567…
GO:1901135	carbohydrate derivative metabolic process	biological process	38/234	79/681	0.00515	1	TRINITY_DN1427_c0_g1(-2.09599714025),TRINITY_DN1445_c0_g1(-3.12136795106),TRINITY_DN2244_c0_g1(-2.14833104305),TRINITY_DN2301_c0_g1(2.37287805567),TRINITY_DN2512_c2_g5(-3.78741905927),TRINITY_DN2610_c4_g1(-1.54090835941),TRINITY_DN2638_c4_g1(-1.94308971346),TRINITY_DN2638_c4_g3(-1.69613457802),TRINITY_DN2670_c0_g1(-1.16807489944),TRINITY_DN2713_c2_g2(-1.10006926738),TRINITY_DN2713_c2_g4(-1.538489…	TRINITY_DN1427_c0_g1(-2.09599714025),TRINITY_DN1445_c0_g1(-3.12136795106),TRINITY_DN2244_c0_g1(-2.14833104305),TRINITY_DN2301_c0_g1(2.37287805567),TRINITY_DN2512_c2_g5(-3.78741905927),TRINITY_DN2610_c4_g1(-1.54090835941),TRINITY_DN2638_c4_g1(-1.94308971346),TRINITY_DN2638_c4_g3(-1.69613457802),TRINITY_DN2670_c0_g1(-1.16807489944),TRINITY_DN2713_c2_g2(-1.10006926738),TRINITY_DN2713_c2_g4(-1.538489…
GO:0048285	organelle fission	biological process	13/234	21/681	0.00815	1	TRINITY_DN2576_c0_g2(-1.04508082347),TRINITY_DN2618_c2_g3(1.16746035949),TRINITY_DN2674_c3_g1(-1.20247600187),TRINITY_DN2830_c1_g6(-2.81950059698),TRINITY_DN2880_c5_g2(-1.41891648753),TRINITY_DN2986_c3_g1(-1.95868262638),TRINITY_DN3081_c0_g1(1.24454299096),TRINITY_DN3368_c3_g3(-1.35865189413),TRINITY_DN3461_c2_g1(-3.67850947106),TRINITY_DN3512_c0_g2(-1.87901474245),TRINITY_DN3656_c1_g1(-2.0872116…	TRINITY_DN2576_c0_g2(-1.04508082347),TRINITY_DN2618_c2_g3(1.16746035949),TRINITY_DN2674_c3_g1(-1.20247600187),TRINITY_DN2830_c1_g6(-2.81950059698),TRINITY_DN2880_c5_g2(-1.41891648753),TRINITY_DN2986_c3_g1(-1.95868262638),TRINITY_DN3081_c0_g1(1.24454299096),TRINITY_DN3368_c3_g3(-1.35865189413),TRINITY_DN3461_c2_g1(-3.67850947106),TRINITY_DN3512_c0_g2(-1.87901474245),TRINITY_DN3656_c1_g1(-2.0872116…
GO:0007033	vacuole organization	biological process	7/234	9/681	0.00956	1	TRINITY_DN2618_c2_g3(1.16746035949),TRINITY_DN2948_c3_g2(-1.25152991183),TRINITY_DN3344_c2_g2(-1.07984282302),TRINITY_DN3416_c0_g3(-1.06697066005),TRINITY_DN3512_c0_g2(-1.87901474245),TRINITY_DN3656_c1_g1(-2.08721167236),TRINITY_DN3656_c1_g5(-3.02684114829)	TRINITY_DN2618_c2_g3(1.16746035949),TRINITY_DN2948_c3_g2(-1.25152991183),TRINITY_DN3344_c2_g2(-1.07984282302),TRINITY_DN3416_c0_g3(-1.06697066005),TRINITY_DN3512_c0_g2(-1.87901474245),TRINITY_DN3656_c1_g1(-2.08721167236),TRINITY_DN3656_c1_g5(-3.02684114829)
GO:0006869	lipid transport	biological process	10/234	15/681	0.01004	1	TRINITY_DN2618_c2_g3(1.16746035949),TRINITY_DN2948_c3_g2(-1.25152991183),TRINITY_DN3344_c2_g2(-1.07984282302),TRINITY_DN3416_c0_g3(-1.06697066005),TRINITY_DN3512_c0_g2(-1.87901474245),TRINITY_DN3600_c1_g3(3.14748655044),TRINITY_DN3652_c2_g3(-1.56460548199),TRINITY_DN3656_c1_g1(-2.08721167236),TRINITY_DN3656_c1_g5(-3.02684114829),TRINITY_DN3676_c1_g2(-1.47016619416)	TRINITY_DN2618_c2_g3(1.16746035949),TRINITY_DN2948_c3_g2(-1.25152991183),TRINITY_DN3344_c2_g2(-1.07984282302),TRINITY_DN3416_c0_g3(-1.06697066005),TRINITY_DN3512_c0_g2(-1.87901474245),TRINITY_DN3600_c1_g3(3.14748655044),TRINITY_DN3652_c2_g3(-1.56460548199),TRINITY_DN3656_c1_g1(-2.08721167236),TRINITY_DN3656_c1_g5(-3.02684114829),TRINITY_DN3676_c1_g2(-1.47016619416)
GO:0010876	lipid localization	biological process	10/234	15/681	0.01004	1	TRINITY_DN2618_c2_g3(1.16746035949),TRINITY_DN2948_c3_g2(-1.25152991183),TRINITY_DN3344_c2_g2(-1.07984282302),TRINITY_DN3416_c0_g3(-1.06697066005),TRINITY_DN3512_c0_g2(-1.87901474245),TRINITY_DN3600_c1_g3(3.14748655044),TRINITY_DN3652_c2_g3(-1.56460548199),TRINITY_DN3656_c1_g1(-2.08721167236),TRINITY_DN3656_c1_g5(-3.02684114829),TRINITY_DN3676_c1_g2(-1.47016619416)	TRINITY_DN2618_c2_g3(1.16746035949),TRINITY_DN2948_c3_g2(-1.25152991183),TRINITY_DN3344_c2_g2(-1.07984282302),TRINITY_DN3416_c0_g3(-1.06697066005),TRINITY_DN3512_c0_g2(-1.87901474245),TRINITY_DN3600_c1_g3(3.14748655044),TRINITY_DN3652_c2_g3(-1.56460548199),TRINITY_DN3656_c1_g1(-2.08721167236),TRINITY_DN3656_c1_g5(-3.02684114829),TRINITY_DN3676_c1_g2(-1.47016619416)
GO:0001578	microtubule bundle formation	biological process	9/234	13/681	0.01035	1	TRINITY_DN109_c0_g1(-2.43108989434),TRINITY_DN1245_c0_g2(-3.43593361414),TRINITY_DN2656_c0_g2(-4.58846026162),TRINITY_DN2881_c4_g1(-2.13230653776),TRINITY_DN311_c0_g1(-3.06936398231),TRINITY_DN3282_c0_g4(1.20593803666),TRINITY_DN3495_c0_g2(-1.90844140963),TRINITY_DN3526_c2_g3(-3.28668474605),TRINITY_DN99_c0_g1(-1.6657118923)	TRINITY_DN109_c0_g1(-2.43108989434),TRINITY_DN1245_c0_g2(-3.43593361414),TRINITY_DN2656_c0_g2(-4.58846026162),TRINITY_DN2881_c4_g1(-2.13230653776),TRINITY_DN311_c0_g1(-3.06936398231),TRINITY_DN3282_c0_g4(1.20593803666),TRINITY_DN3495_c0_g2(-1.90844140963),TRINITY_DN3526_c2_g3(-3.28668474605),TRINITY_DN99_c0_g1(-1.6657118923)
GO:0042981	regulation of apoptotic process	biological process	17/234	31/681	0.01339	1	TRINITY_DN1267_c0_g1(-3.74317437745),TRINITY_DN1551_c0_g1(-2.62773240149),TRINITY_DN2512_c2_g5(-3.78741905927),TRINITY_DN2618_c2_g3(1.16746035949),TRINITY_DN2948_c3_g2(-1.25152991183),TRINITY_DN2990_c3_g1(4.48637222765),TRINITY_DN3135_c2_g3(1.84163748525),TRINITY_DN3238_c1_g1(4.68706194956),TRINITY_DN3311_c1_g2(-1.13281740221),TRINITY_DN3344_c2_g2(-1.07984282302),TRINITY_DN3355_c2_g2(-1.839199667…	TRINITY_DN1267_c0_g1(-3.74317437745),TRINITY_DN1551_c0_g1(-2.62773240149),TRINITY_DN2512_c2_g5(-3.78741905927),TRINITY_DN2618_c2_g3(1.16746035949),TRINITY_DN2948_c3_g2(-1.25152991183),TRINITY_DN2990_c3_g1(4.48637222765),TRINITY_DN3135_c2_g3(1.84163748525),TRINITY_DN3238_c1_g1(4.68706194956),TRINITY_DN3311_c1_g2(-1.13281740221),TRINITY_DN3344_c2_g2(-1.07984282302),TRINITY_DN3355_c2_g2(-1.839199667…
GO:0007368	determination of left/right symmetry	biological process	4/234	4/681	0.01371	1	TRINITY_DN1551_c0_g1(-2.62773240149),TRINITY_DN2656_c0_g2(-4.58846026162),TRINITY_DN2990_c3_g1(4.48637222765),TRINITY_DN311_c0_g1(-3.06936398231)	TRINITY_DN1551_c0_g1(-2.62773240149),TRINITY_DN2656_c0_g2(-4.58846026162),TRINITY_DN2990_c3_g1(4.48637222765),TRINITY_DN311_c0_g1(-3.06936398231)
GO:0009799	specification of symmetry	biological process	4/234	4/681	0.01371	1	TRINITY_DN1551_c0_g1(-2.62773240149),TRINITY_DN2656_c0_g2(-4.58846026162),TRINITY_DN2990_c3_g1(4.48637222765),TRINITY_DN311_c0_g1(-3.06936398231)	TRINITY_DN1551_c0_g1(-2.62773240149),TRINITY_DN2656_c0_g2(-4.58846026162),TRINITY_DN2990_c3_g1(4.48637222765),TRINITY_DN311_c0_g1(-3.06936398231)
GO:0009855	determination of bilateral symmetry	biological process	4/234	4/681	0.01371	1	TRINITY_DN1551_c0_g1(-2.62773240149),TRINITY_DN2656_c0_g2(-4.58846026162),TRINITY_DN2990_c3_g1(4.48637222765),TRINITY_DN311_c0_g1(-3.06936398231)	TRINITY_DN1551_c0_g1(-2.62773240149),TRINITY_DN2656_c0_g2(-4.58846026162),TRINITY_DN2990_c3_g1(4.48637222765),TRINITY_DN311_c0_g1(-3.06936398231)
GO:0006915	apoptotic process	biological process	18/234	34/681	0.01733	1	TRINITY_DN1267_c0_g1(-3.74317437745),TRINITY_DN1551_c0_g1(-2.62773240149),TRINITY_DN2512_c2_g5(-3.78741905927),TRINITY_DN2618_c2_g3(1.16746035949),TRINITY_DN2948_c3_g2(-1.25152991183),TRINITY_DN2990_c3_g1(4.48637222765),TRINITY_DN3135_c2_g3(1.84163748525),TRINITY_DN3238_c1_g1(4.68706194956),TRINITY_DN3285_c2_g1(-1.58640393684),TRINITY_DN3311_c1_g2(-1.13281740221),TRINITY_DN3344_c2_g2(-1.079842823…	TRINITY_DN1267_c0_g1(-3.74317437745),TRINITY_DN1551_c0_g1(-2.62773240149),TRINITY_DN2512_c2_g5(-3.78741905927),TRINITY_DN2618_c2_g3(1.16746035949),TRINITY_DN2948_c3_g2(-1.25152991183),TRINITY_DN2990_c3_g1(4.48637222765),TRINITY_DN3135_c2_g3(1.84163748525),TRINITY_DN3238_c1_g1(4.68706194956),TRINITY_DN3285_c2_g1(-1.58640393684),TRINITY_DN3311_c1_g2(-1.13281740221),TRINITY_DN3344_c2_g2(-1.079842823…
GO:0043067	regulation of programmed cell death	biological process	18/234	34/681	0.01733	1	TRINITY_DN1267_c0_g1(-3.74317437745),TRINITY_DN1551_c0_g1(-2.62773240149),TRINITY_DN2512_c2_g5(-3.78741905927),TRINITY_DN2618_c2_g3(1.16746035949),TRINITY_DN2948_c3_g2(-1.25152991183),TRINITY_DN2990_c3_g1(4.48637222765),TRINITY_DN3135_c2_g3(1.84163748525),TRINITY_DN3238_c1_g1(4.68706194956),TRINITY_DN3311_c1_g2(-1.13281740221),TRINITY_DN3344_c2_g2(-1.07984282302),TRINITY_DN3355_c2_g2(-1.839199667…	TRINITY_DN1267_c0_g1(-3.74317437745),TRINITY_DN1551_c0_g1(-2.62773240149),TRINITY_DN2512_c2_g5(-3.78741905927),TRINITY_DN2618_c2_g3(1.16746035949),TRINITY_DN2948_c3_g2(-1.25152991183),TRINITY_DN2990_c3_g1(4.48637222765),TRINITY_DN3135_c2_g3(1.84163748525),TRINITY_DN3238_c1_g1(4.68706194956),TRINITY_DN3311_c1_g2(-1.13281740221),TRINITY_DN3344_c2_g2(-1.07984282302),TRINITY_DN3355_c2_g2(-1.839199667…
GO:0007049	cell cycle	biological process	29/234	61/681	0.01795	1	TRINITY_DN1551_c0_g1(-2.62773240149),TRINITY_DN1577_c0_g1(-1.27109622825),TRINITY_DN2576_c0_g2(-1.04508082347),TRINITY_DN2594_c2_g3(-1.36851091336),TRINITY_DN2618_c2_g3(1.16746035949),TRINITY_DN2639_c3_g4(-1.71335820389),TRINITY_DN2674_c3_g1(-1.20247600187),TRINITY_DN2786_c2_g4(-1.88079518437),TRINITY_DN2830_c1_g6(-2.81950059698),TRINITY_DN2834_c2_g1(-1.88177373969),TRINITY_DN2880_c5_g2(-1.418916…	TRINITY_DN1551_c0_g1(-2.62773240149),TRINITY_DN1577_c0_g1(-1.27109622825),TRINITY_DN2576_c0_g2(-1.04508082347),TRINITY_DN2594_c2_g3(-1.36851091336),TRINITY_DN2618_c2_g3(1.16746035949),TRINITY_DN2639_c3_g4(-1.71335820389),TRINITY_DN2674_c3_g1(-1.20247600187),TRINITY_DN2786_c2_g4(-1.88079518437),TRINITY_DN2830_c1_g6(-2.81950059698),TRINITY_DN2834_c2_g1(-1.88177373969),TRINITY_DN2880_c5_g2(-1.418916…
GO:0000911	cytokinesis by cell plate formation	biological process	5/234	6/681	0.02005	1	TRINITY_DN2594_c2_g3(-1.36851091336),TRINITY_DN2639_c3_g4(-1.71335820389),TRINITY_DN2786_c2_g4(-1.88079518437),TRINITY_DN3034_c3_g2(-2.78869539746),TRINITY_DN3580_c0_g1(-1.66708596092)	TRINITY_DN2594_c2_g3(-1.36851091336),TRINITY_DN2639_c3_g4(-1.71335820389),TRINITY_DN2786_c2_g4(-1.88079518437),TRINITY_DN3034_c3_g2(-2.78869539746),TRINITY_DN3580_c0_g1(-1.66708596092)
GO:0010458	exit from mitosis	biological process	5/234	6/681	0.02005	1	TRINITY_DN2618_c2_g3(1.16746035949),TRINITY_DN2830_c1_g6(-2.81950059698),TRINITY_DN3512_c0_g2(-1.87901474245),TRINITY_DN3656_c1_g1(-2.08721167236),TRINITY_DN3656_c1_g5(-3.02684114829)	TRINITY_DN2618_c2_g3(1.16746035949),TRINITY_DN2830_c1_g6(-2.81950059698),TRINITY_DN3512_c0_g2(-1.87901474245),TRINITY_DN3656_c1_g1(-2.08721167236),TRINITY_DN3656_c1_g5(-3.02684114829)
GO:0030447	filamentous growth	biological process	5/234	6/681	0.02005	1	TRINITY_DN2610_c4_g1(-1.54090835941),TRINITY_DN2618_c2_g3(1.16746035949),TRINITY_DN3512_c0_g2(-1.87901474245),TRINITY_DN3656_c1_g1(-2.08721167236),TRINITY_DN3656_c1_g5(-3.02684114829)	TRINITY_DN2610_c4_g1(-1.54090835941),TRINITY_DN2618_c2_g3(1.16746035949),TRINITY_DN3512_c0_g2(-1.87901474245),TRINITY_DN3656_c1_g1(-2.08721167236),TRINITY_DN3656_c1_g5(-3.02684114829)
GO:0036180	filamentous growth of a population of unicellular organisms in response to biotic stimulus	biological process	5/234	6/681	0.02005	1	TRINITY_DN2610_c4_g1(-1.54090835941),TRINITY_DN2618_c2_g3(1.16746035949),TRINITY_DN3512_c0_g2(-1.87901474245),TRINITY_DN3656_c1_g1(-2.08721167236),TRINITY_DN3656_c1_g5(-3.02684114829)	TRINITY_DN2610_c4_g1(-1.54090835941),TRINITY_DN2618_c2_g3(1.16746035949),TRINITY_DN3512_c0_g2(-1.87901474245),TRINITY_DN3656_c1_g1(-2.08721167236),TRINITY_DN3656_c1_g5(-3.02684114829)
GO:0044182	filamentous growth of a population of unicellular organisms	biological process	5/234	6/681	0.02005	1	TRINITY_DN2610_c4_g1(-1.54090835941),TRINITY_DN2618_c2_g3(1.16746035949),TRINITY_DN3512_c0_g2(-1.87901474245),TRINITY_DN3656_c1_g1(-2.08721167236),TRINITY_DN3656_c1_g5(-3.02684114829)	TRINITY_DN2610_c4_g1(-1.54090835941),TRINITY_DN2618_c2_g3(1.16746035949),TRINITY_DN3512_c0_g2(-1.87901474245),TRINITY_DN3656_c1_g1(-2.08721167236),TRINITY_DN3656_c1_g5(-3.02684114829)
GO:0034762	regulation of transmembrane transport	biological process	8/234	12/681	0.02175	1	TRINITY_DN1357_c0_g1(-2.55339730538),TRINITY_DN2642_c2_g4(2.69107002639),TRINITY_DN2677_c1_g2(1.75084897723),TRINITY_DN2991_c1_g2(-1.38723740444),TRINITY_DN3032_c1_g3(-1.81290474391),TRINITY_DN3130_c0_g1(-1.11371794823),TRINITY_DN3324_c1_g1(-1.19910771168),TRINITY_DN3757_c3_g4(2.45866702157)	TRINITY_DN1357_c0_g1(-2.55339730538),TRINITY_DN2642_c2_g4(2.69107002639),TRINITY_DN2677_c1_g2(1.75084897723),TRINITY_DN2991_c1_g2(-1.38723740444),TRINITY_DN3032_c1_g3(-1.81290474391),TRINITY_DN3130_c0_g1(-1.11371794823),TRINITY_DN3324_c1_g1(-1.19910771168),TRINITY_DN3757_c3_g4(2.45866702157)
GO:0034765	regulation of ion transmembrane transport	biological process	8/234	12/681	0.02175	1	TRINITY_DN1357_c0_g1(-2.55339730538),TRINITY_DN2642_c2_g4(2.69107002639),TRINITY_DN2677_c1_g2(1.75084897723),TRINITY_DN2991_c1_g2(-1.38723740444),TRINITY_DN3032_c1_g3(-1.81290474391),TRINITY_DN3130_c0_g1(-1.11371794823),TRINITY_DN3324_c1_g1(-1.19910771168),TRINITY_DN3757_c3_g4(2.45866702157)	TRINITY_DN1357_c0_g1(-2.55339730538),TRINITY_DN2642_c2_g4(2.69107002639),TRINITY_DN2677_c1_g2(1.75084897723),TRINITY_DN2991_c1_g2(-1.38723740444),TRINITY_DN3032_c1_g3(-1.81290474391),TRINITY_DN3130_c0_g1(-1.11371794823),TRINITY_DN3324_c1_g1(-1.19910771168),TRINITY_DN3757_c3_g4(2.45866702157)
GO:0043269	regulation of ion transport	biological process	8/234	12/681	0.02175	1	TRINITY_DN1357_c0_g1(-2.55339730538),TRINITY_DN2642_c2_g4(2.69107002639),TRINITY_DN2677_c1_g2(1.75084897723),TRINITY_DN2991_c1_g2(-1.38723740444),TRINITY_DN3032_c1_g3(-1.81290474391),TRINITY_DN3130_c0_g1(-1.11371794823),TRINITY_DN3324_c1_g1(-1.19910771168),TRINITY_DN3757_c3_g4(2.45866702157)	TRINITY_DN1357_c0_g1(-2.55339730538),TRINITY_DN2642_c2_g4(2.69107002639),TRINITY_DN2677_c1_g2(1.75084897723),TRINITY_DN2991_c1_g2(-1.38723740444),TRINITY_DN3032_c1_g3(-1.81290474391),TRINITY_DN3130_c0_g1(-1.11371794823),TRINITY_DN3324_c1_g1(-1.19910771168),TRINITY_DN3757_c3_g4(2.45866702157)
GO:0008272	sulfate transport	biological process	6/234	8/681	0.02236	1	TRINITY_DN1269_c0_g1(-2.69702190868),TRINITY_DN2823_c2_g4(-1.13639408501),TRINITY_DN3217_c0_g1(-4.26414724998),TRINITY_DN3217_c0_g2(-14.4886184371),TRINITY_DN3572_c0_g1(2.50846379256),TRINITY_DN3572_c0_g4(-1.01046578553)	TRINITY_DN1269_c0_g1(-2.69702190868),TRINITY_DN2823_c2_g4(-1.13639408501),TRINITY_DN3217_c0_g1(-4.26414724998),TRINITY_DN3217_c0_g2(-14.4886184371),TRINITY_DN3572_c0_g1(2.50846379256),TRINITY_DN3572_c0_g4(-1.01046578553)
GO:0006261	DNA-dependent DNA replication	biological process	7/234	10/681	0.02259	1	TRINITY_DN1577_c0_g1(-1.27109622825),TRINITY_DN2834_c2_g1(-1.88177373969),TRINITY_DN3034_c3_g2(-2.78869539746),TRINITY_DN3172_c3_g4(-1.50849298535),TRINITY_DN3311_c1_g2(-1.13281740221),TRINITY_DN3343_c1_g7(1.11505558557),TRINITY_DN3593_c3_g1(-1.127844984)	TRINITY_DN1577_c0_g1(-1.27109622825),TRINITY_DN2834_c2_g1(-1.88177373969),TRINITY_DN3034_c3_g2(-2.78869539746),TRINITY_DN3172_c3_g4(-1.50849298535),TRINITY_DN3311_c1_g2(-1.13281740221),TRINITY_DN3343_c1_g7(1.11505558557),TRINITY_DN3593_c3_g1(-1.127844984)
GO:0009405	pathogenesis	biological process	7/234	10/681	0.02259	1	TRINITY_DN2244_c0_g1(-2.14833104305),TRINITY_DN2610_c4_g1(-1.54090835941),TRINITY_DN2618_c2_g3(1.16746035949),TRINITY_DN2670_c0_g1(-1.16807489944),TRINITY_DN3512_c0_g2(-1.87901474245),TRINITY_DN3656_c1_g1(-2.08721167236),TRINITY_DN3656_c1_g5(-3.02684114829)	TRINITY_DN2244_c0_g1(-2.14833104305),TRINITY_DN2610_c4_g1(-1.54090835941),TRINITY_DN2618_c2_g3(1.16746035949),TRINITY_DN2670_c0_g1(-1.16807489944),TRINITY_DN3512_c0_g2(-1.87901474245),TRINITY_DN3656_c1_g1(-2.08721167236),TRINITY_DN3656_c1_g5(-3.02684114829)
GO:0031098	stress-activated protein kinase signaling cascade	biological process	7/234	10/681	0.02259	1	TRINITY_DN2618_c2_g3(1.16746035949),TRINITY_DN3135_c2_g3(1.84163748525),TRINITY_DN3238_c1_g1(4.68706194956),TRINITY_DN3355_c2_g2(-1.83919966724),TRINITY_DN3512_c0_g2(-1.87901474245),TRINITY_DN3656_c1_g1(-2.08721167236),TRINITY_DN3656_c1_g5(-3.02684114829)	TRINITY_DN2618_c2_g3(1.16746035949),TRINITY_DN3135_c2_g3(1.84163748525),TRINITY_DN3238_c1_g1(4.68706194956),TRINITY_DN3355_c2_g2(-1.83919966724),TRINITY_DN3512_c0_g2(-1.87901474245),TRINITY_DN3656_c1_g1(-2.08721167236),TRINITY_DN3656_c1_g5(-3.02684114829)
GO:0022402	cell cycle process	biological process	27/234	57/681	0.02356	1	TRINITY_DN1551_c0_g1(-2.62773240149),TRINITY_DN1577_c0_g1(-1.27109622825),TRINITY_DN2576_c0_g2(-1.04508082347),TRINITY_DN2594_c2_g3(-1.36851091336),TRINITY_DN2618_c2_g3(1.16746035949),TRINITY_DN2639_c3_g4(-1.71335820389),TRINITY_DN2674_c3_g1(-1.20247600187),TRINITY_DN2786_c2_g4(-1.88079518437),TRINITY_DN2830_c1_g6(-2.81950059698),TRINITY_DN2834_c2_g1(-1.88177373969),TRINITY_DN2880_c5_g2(-1.418916…	TRINITY_DN1551_c0_g1(-2.62773240149),TRINITY_DN1577_c0_g1(-1.27109622825),TRINITY_DN2576_c0_g2(-1.04508082347),TRINITY_DN2594_c2_g3(-1.36851091336),TRINITY_DN2618_c2_g3(1.16746035949),TRINITY_DN2639_c3_g4(-1.71335820389),TRINITY_DN2674_c3_g1(-1.20247600187),TRINITY_DN2786_c2_g4(-1.88079518437),TRINITY_DN2830_c1_g6(-2.81950059698),TRINITY_DN2834_c2_g1(-1.88177373969),TRINITY_DN2880_c5_g2(-1.418916…
GO:0007346	regulation of mitotic cell cycle	biological process	12/234	21/681	0.02518	1	TRINITY_DN1577_c0_g1(-1.27109622825),TRINITY_DN2618_c2_g3(1.16746035949),TRINITY_DN2830_c1_g6(-2.81950059698),TRINITY_DN2990_c3_g1(4.48637222765),TRINITY_DN3135_c2_g3(1.84163748525),TRINITY_DN3238_c1_g1(4.68706194956),TRINITY_DN3285_c2_g1(-1.58640393684),TRINITY_DN3355_c2_g2(-1.83919966724),TRINITY_DN3512_c0_g2(-1.87901474245),TRINITY_DN3656_c1_g1(-2.08721167236),TRINITY_DN3656_c1_g5(-3.026841148…	TRINITY_DN1577_c0_g1(-1.27109622825),TRINITY_DN2618_c2_g3(1.16746035949),TRINITY_DN2830_c1_g6(-2.81950059698),TRINITY_DN2990_c3_g1(4.48637222765),TRINITY_DN3135_c2_g3(1.84163748525),TRINITY_DN3238_c1_g1(4.68706194956),TRINITY_DN3285_c2_g1(-1.58640393684),TRINITY_DN3355_c2_g2(-1.83919966724),TRINITY_DN3512_c0_g2(-1.87901474245),TRINITY_DN3656_c1_g1(-2.08721167236),TRINITY_DN3656_c1_g5(-3.026841148…
GO:0000280	nuclear division	biological process	11/234	19/681	0.02843	1	TRINITY_DN2576_c0_g2(-1.04508082347),TRINITY_DN2618_c2_g3(1.16746035949),TRINITY_DN2674_c3_g1(-1.20247600187),TRINITY_DN2830_c1_g6(-2.81950059698),TRINITY_DN2880_c5_g2(-1.41891648753),TRINITY_DN2986_c3_g1(-1.95868262638),TRINITY_DN3368_c3_g3(-1.35865189413),TRINITY_DN3512_c0_g2(-1.87901474245),TRINITY_DN3656_c1_g1(-2.08721167236),TRINITY_DN3656_c1_g5(-3.02684114829),TRINITY_DN3688_c1_g7(-2.386403…	TRINITY_DN2576_c0_g2(-1.04508082347),TRINITY_DN2618_c2_g3(1.16746035949),TRINITY_DN2674_c3_g1(-1.20247600187),TRINITY_DN2830_c1_g6(-2.81950059698),TRINITY_DN2880_c5_g2(-1.41891648753),TRINITY_DN2986_c3_g1(-1.95868262638),TRINITY_DN3368_c3_g3(-1.35865189413),TRINITY_DN3512_c0_g2(-1.87901474245),TRINITY_DN3656_c1_g1(-2.08721167236),TRINITY_DN3656_c1_g5(-3.02684114829),TRINITY_DN3688_c1_g7(-2.386403…
GO:0000278	mitotic cell cycle	biological process	21/234	43/681	0.03073	1	TRINITY_DN1551_c0_g1(-2.62773240149),TRINITY_DN1577_c0_g1(-1.27109622825),TRINITY_DN2594_c2_g3(-1.36851091336),TRINITY_DN2618_c2_g3(1.16746035949),TRINITY_DN2639_c3_g4(-1.71335820389),TRINITY_DN2674_c3_g1(-1.20247600187),TRINITY_DN2786_c2_g4(-1.88079518437),TRINITY_DN2830_c1_g6(-2.81950059698),TRINITY_DN2990_c3_g1(4.48637222765),TRINITY_DN3034_c3_g2(-2.78869539746),TRINITY_DN3135_c2_g3(1.84163748…	TRINITY_DN1551_c0_g1(-2.62773240149),TRINITY_DN1577_c0_g1(-1.27109622825),TRINITY_DN2594_c2_g3(-1.36851091336),TRINITY_DN2618_c2_g3(1.16746035949),TRINITY_DN2639_c3_g4(-1.71335820389),TRINITY_DN2674_c3_g1(-1.20247600187),TRINITY_DN2786_c2_g4(-1.88079518437),TRINITY_DN2830_c1_g6(-2.81950059698),TRINITY_DN2990_c3_g1(4.48637222765),TRINITY_DN3034_c3_g2(-2.78869539746),TRINITY_DN3135_c2_g3(1.84163748…
GO:0022412	cellular process involved in reproduction in multicellular organism	biological process	10/234	17/681	0.032	1	TRINITY_DN1577_c0_g1(-1.27109622825),TRINITY_DN2521_c4_g1(-2.61442070653),TRINITY_DN2576_c0_g2(-1.04508082347),TRINITY_DN2948_c3_g2(-1.25152991183),TRINITY_DN2986_c3_g1(-1.95868262638),TRINITY_DN2990_c3_g1(4.48637222765),TRINITY_DN3282_c0_g4(1.20593803666),TRINITY_DN3344_c2_g2(-1.07984282302),TRINITY_DN3416_c0_g3(-1.06697066005),TRINITY_DN3602_c4_g2(-2.95532582631)	TRINITY_DN1577_c0_g1(-1.27109622825),TRINITY_DN2521_c4_g1(-2.61442070653),TRINITY_DN2576_c0_g2(-1.04508082347),TRINITY_DN2948_c3_g2(-1.25152991183),TRINITY_DN2986_c3_g1(-1.95868262638),TRINITY_DN2990_c3_g1(4.48637222765),TRINITY_DN3282_c0_g4(1.20593803666),TRINITY_DN3344_c2_g2(-1.07984282302),TRINITY_DN3416_c0_g3(-1.06697066005),TRINITY_DN3602_c4_g2(-2.95532582631)
GO:1903047	mitotic cell cycle process	biological process	20/234	41/681	0.03525	1	TRINITY_DN1551_c0_g1(-2.62773240149),TRINITY_DN1577_c0_g1(-1.27109622825),TRINITY_DN2594_c2_g3(-1.36851091336),TRINITY_DN2618_c2_g3(1.16746035949),TRINITY_DN2639_c3_g4(-1.71335820389),TRINITY_DN2674_c3_g1(-1.20247600187),TRINITY_DN2786_c2_g4(-1.88079518437),TRINITY_DN2830_c1_g6(-2.81950059698),TRINITY_DN3034_c3_g2(-2.78869539746),TRINITY_DN3135_c2_g3(1.84163748525),TRINITY_DN3238_c1_g1(4.68706194…	TRINITY_DN1551_c0_g1(-2.62773240149),TRINITY_DN1577_c0_g1(-1.27109622825),TRINITY_DN2594_c2_g3(-1.36851091336),TRINITY_DN2618_c2_g3(1.16746035949),TRINITY_DN2639_c3_g4(-1.71335820389),TRINITY_DN2674_c3_g1(-1.20247600187),TRINITY_DN2786_c2_g4(-1.88079518437),TRINITY_DN2830_c1_g6(-2.81950059698),TRINITY_DN3034_c3_g2(-2.78869539746),TRINITY_DN3135_c2_g3(1.84163748525),TRINITY_DN3238_c1_g1(4.68706194…
GO:0007178	transmembrane receptor protein serine/threonine kinase signaling pathway	biological process	9/234	15/681	0.03588	1	TRINITY_DN1357_c0_g1(-2.55339730538),TRINITY_DN1896_c0_g1(-1.43122376696),TRINITY_DN2677_c1_g2(1.75084897723),TRINITY_DN2948_c3_g2(-1.25152991183),TRINITY_DN2991_c1_g2(-1.38723740444),TRINITY_DN3130_c0_g1(-1.11371794823),TRINITY_DN3344_c2_g2(-1.07984282302),TRINITY_DN3416_c0_g3(-1.06697066005),TRINITY_DN3757_c3_g4(2.45866702157)	TRINITY_DN1357_c0_g1(-2.55339730538),TRINITY_DN1896_c0_g1(-1.43122376696),TRINITY_DN2677_c1_g2(1.75084897723),TRINITY_DN2948_c3_g2(-1.25152991183),TRINITY_DN2991_c1_g2(-1.38723740444),TRINITY_DN3130_c0_g1(-1.11371794823),TRINITY_DN3344_c2_g2(-1.07984282302),TRINITY_DN3416_c0_g3(-1.06697066005),TRINITY_DN3757_c3_g4(2.45866702157)
GO:0010648	negative regulation of cell communication	biological process	9/234	15/681	0.03588	1	TRINITY_DN1896_c0_g1(-1.43122376696),TRINITY_DN2244_c0_g1(-2.14833104305),TRINITY_DN2512_c2_g5(-3.78741905927),TRINITY_DN2559_c3_g1(-1.41187808043),TRINITY_DN2670_c0_g1(-1.16807489944),TRINITY_DN2863_c0_g2(-1.17670982061),TRINITY_DN2948_c3_g2(-1.25152991183),TRINITY_DN3344_c2_g2(-1.07984282302),TRINITY_DN3416_c0_g3(-1.06697066005)	TRINITY_DN1896_c0_g1(-1.43122376696),TRINITY_DN2244_c0_g1(-2.14833104305),TRINITY_DN2512_c2_g5(-3.78741905927),TRINITY_DN2559_c3_g1(-1.41187808043),TRINITY_DN2670_c0_g1(-1.16807489944),TRINITY_DN2863_c0_g2(-1.17670982061),TRINITY_DN2948_c3_g2(-1.25152991183),TRINITY_DN3344_c2_g2(-1.07984282302),TRINITY_DN3416_c0_g3(-1.06697066005)
GO:0023057	negative regulation of signaling	biological process	9/234	15/681	0.03588	1	TRINITY_DN1896_c0_g1(-1.43122376696),TRINITY_DN2244_c0_g1(-2.14833104305),TRINITY_DN2512_c2_g5(-3.78741905927),TRINITY_DN2559_c3_g1(-1.41187808043),TRINITY_DN2670_c0_g1(-1.16807489944),TRINITY_DN2863_c0_g2(-1.17670982061),TRINITY_DN2948_c3_g2(-1.25152991183),TRINITY_DN3344_c2_g2(-1.07984282302),TRINITY_DN3416_c0_g3(-1.06697066005)	TRINITY_DN1896_c0_g1(-1.43122376696),TRINITY_DN2244_c0_g1(-2.14833104305),TRINITY_DN2512_c2_g5(-3.78741905927),TRINITY_DN2559_c3_g1(-1.41187808043),TRINITY_DN2670_c0_g1(-1.16807489944),TRINITY_DN2863_c0_g2(-1.17670982061),TRINITY_DN2948_c3_g2(-1.25152991183),TRINITY_DN3344_c2_g2(-1.07984282302),TRINITY_DN3416_c0_g3(-1.06697066005)
GO:0051347	positive regulation of transferase activity	biological process	9/234	15/681	0.03588	1	TRINITY_DN1268_c0_g1(-2.06811775799),TRINITY_DN1551_c0_g1(-2.62773240149),TRINITY_DN2618_c2_g3(1.16746035949),TRINITY_DN3135_c2_g3(1.84163748525),TRINITY_DN3238_c1_g1(4.68706194956),TRINITY_DN3355_c2_g2(-1.83919966724),TRINITY_DN3512_c0_g2(-1.87901474245),TRINITY_DN3656_c1_g1(-2.08721167236),TRINITY_DN3656_c1_g5(-3.02684114829)	TRINITY_DN1268_c0_g1(-2.06811775799),TRINITY_DN1551_c0_g1(-2.62773240149),TRINITY_DN2618_c2_g3(1.16746035949),TRINITY_DN3135_c2_g3(1.84163748525),TRINITY_DN3238_c1_g1(4.68706194956),TRINITY_DN3355_c2_g2(-1.83919966724),TRINITY_DN3512_c0_g2(-1.87901474245),TRINITY_DN3656_c1_g1(-2.08721167236),TRINITY_DN3656_c1_g5(-3.02684114829)
GO:0001934	positive regulation of protein phosphorylation	biological process	8/234	13/681	0.03998	1	TRINITY_DN1551_c0_g1(-2.62773240149),TRINITY_DN2618_c2_g3(1.16746035949),TRINITY_DN3135_c2_g3(1.84163748525),TRINITY_DN3238_c1_g1(4.68706194956),TRINITY_DN3355_c2_g2(-1.83919966724),TRINITY_DN3512_c0_g2(-1.87901474245),TRINITY_DN3656_c1_g1(-2.08721167236),TRINITY_DN3656_c1_g5(-3.02684114829)	TRINITY_DN1551_c0_g1(-2.62773240149),TRINITY_DN2618_c2_g3(1.16746035949),TRINITY_DN3135_c2_g3(1.84163748525),TRINITY_DN3238_c1_g1(4.68706194956),TRINITY_DN3355_c2_g2(-1.83919966724),TRINITY_DN3512_c0_g2(-1.87901474245),TRINITY_DN3656_c1_g1(-2.08721167236),TRINITY_DN3656_c1_g5(-3.02684114829)
GO:0031401	positive regulation of protein modification process	biological process	8/234	13/681	0.03998	1	TRINITY_DN1551_c0_g1(-2.62773240149),TRINITY_DN2618_c2_g3(1.16746035949),TRINITY_DN3135_c2_g3(1.84163748525),TRINITY_DN3238_c1_g1(4.68706194956),TRINITY_DN3355_c2_g2(-1.83919966724),TRINITY_DN3512_c0_g2(-1.87901474245),TRINITY_DN3656_c1_g1(-2.08721167236),TRINITY_DN3656_c1_g5(-3.02684114829)	TRINITY_DN1551_c0_g1(-2.62773240149),TRINITY_DN2618_c2_g3(1.16746035949),TRINITY_DN3135_c2_g3(1.84163748525),TRINITY_DN3238_c1_g1(4.68706194956),TRINITY_DN3355_c2_g2(-1.83919966724),TRINITY_DN3512_c0_g2(-1.87901474245),TRINITY_DN3656_c1_g1(-2.08721167236),TRINITY_DN3656_c1_g5(-3.02684114829)
GO:0045860	positive regulation of protein kinase activity	biological process	8/234	13/681	0.03998	1	TRINITY_DN1551_c0_g1(-2.62773240149),TRINITY_DN2618_c2_g3(1.16746035949),TRINITY_DN3135_c2_g3(1.84163748525),TRINITY_DN3238_c1_g1(4.68706194956),TRINITY_DN3355_c2_g2(-1.83919966724),TRINITY_DN3512_c0_g2(-1.87901474245),TRINITY_DN3656_c1_g1(-2.08721167236),TRINITY_DN3656_c1_g5(-3.02684114829)	TRINITY_DN1551_c0_g1(-2.62773240149),TRINITY_DN2618_c2_g3(1.16746035949),TRINITY_DN3135_c2_g3(1.84163748525),TRINITY_DN3238_c1_g1(4.68706194956),TRINITY_DN3355_c2_g2(-1.83919966724),TRINITY_DN3512_c0_g2(-1.87901474245),TRINITY_DN3656_c1_g1(-2.08721167236),TRINITY_DN3656_c1_g5(-3.02684114829)
GO:0001701	in utero embryonic development	biological process	3/234	3/681	0.04023	1	TRINITY_DN1551_c0_g1(-2.62773240149),TRINITY_DN2990_c3_g1(4.48637222765),TRINITY_DN3602_c4_g2(-2.95532582631)	TRINITY_DN1551_c0_g1(-2.62773240149),TRINITY_DN2990_c3_g1(4.48637222765),TRINITY_DN3602_c4_g2(-2.95532582631)
GO:0006284	base-excision repair	biological process	3/234	3/681	0.04023	1	TRINITY_DN3003_c0_g1(-1.38606041139),TRINITY_DN3285_c2_g1(-1.58640393684),TRINITY_DN3311_c1_g2(-1.13281740221)	TRINITY_DN3003_c0_g1(-1.38606041139),TRINITY_DN3285_c2_g1(-1.58640393684),TRINITY_DN3311_c1_g2(-1.13281740221)
GO:0009593	detection of chemical stimulus	biological process	3/234	3/681	0.04023	1	TRINITY_DN1453_c0_g1(-2.82693098456),TRINITY_DN1926_c0_g1(-2.31459139144),TRINITY_DN3593_c1_g1(-1.02641959886)	TRINITY_DN1453_c0_g1(-2.82693098456),TRINITY_DN1926_c0_g1(-2.31459139144),TRINITY_DN3593_c1_g1(-1.02641959886)
GO:0018209	peptidyl-serine modification	biological process	3/234	3/681	0.04023	1	TRINITY_DN2244_c0_g1(-2.14833104305),TRINITY_DN2670_c0_g1(-1.16807489944),TRINITY_DN3324_c1_g1(-1.19910771168)	TRINITY_DN2244_c0_g1(-2.14833104305),TRINITY_DN2670_c0_g1(-1.16807489944),TRINITY_DN3324_c1_g1(-1.19910771168)
GO:0032271	regulation of protein polymerization	biological process	3/234	3/681	0.04023	1	TRINITY_DN2624_c3_g2(-1.7395971044),TRINITY_DN2881_c4_g1(-2.13230653776),TRINITY_DN3495_c0_g2(-1.90844140963)	TRINITY_DN2624_c3_g2(-1.7395971044),TRINITY_DN2881_c4_g1(-2.13230653776),TRINITY_DN3495_c0_g2(-1.90844140963)
GO:0032273	positive regulation of protein polymerization	biological process	3/234	3/681	0.04023	1	TRINITY_DN2624_c3_g2(-1.7395971044),TRINITY_DN2881_c4_g1(-2.13230653776),TRINITY_DN3495_c0_g2(-1.90844140963)	TRINITY_DN2624_c3_g2(-1.7395971044),TRINITY_DN2881_c4_g1(-2.13230653776),TRINITY_DN3495_c0_g2(-1.90844140963)
GO:0042181	ketone biosynthetic process	biological process	3/234	3/681	0.04023	1	TRINITY_DN1267_c0_g1(-3.74317437745),TRINITY_DN767_c0_g1(-1.4406680883),TRINITY_DN877_c0_g2(-2.38734682685)	TRINITY_DN1267_c0_g1(-3.74317437745),TRINITY_DN767_c0_g1(-1.4406680883),TRINITY_DN877_c0_g2(-2.38734682685)
GO:0051258	protein polymerization	biological process	3/234	3/681	0.04023	1	TRINITY_DN2624_c3_g2(-1.7395971044),TRINITY_DN2881_c4_g1(-2.13230653776),TRINITY_DN3495_c0_g2(-1.90844140963)	TRINITY_DN2624_c3_g2(-1.7395971044),TRINITY_DN2881_c4_g1(-2.13230653776),TRINITY_DN3495_c0_g2(-1.90844140963)
GO:0060485	mesenchyme development	biological process	3/234	3/681	0.04023	1	TRINITY_DN2244_c0_g1(-2.14833104305),TRINITY_DN2670_c0_g1(-1.16807489944),TRINITY_DN2990_c3_g1(4.48637222765)	TRINITY_DN2244_c0_g1(-2.14833104305),TRINITY_DN2670_c0_g1(-1.16807489944),TRINITY_DN2990_c3_g1(4.48637222765)
GO:0061053	somite development	biological process	3/234	3/681	0.04023	1	TRINITY_DN2244_c0_g1(-2.14833104305),TRINITY_DN2670_c0_g1(-1.16807489944),TRINITY_DN2990_c3_g1(4.48637222765)	TRINITY_DN2244_c0_g1(-2.14833104305),TRINITY_DN2670_c0_g1(-1.16807489944),TRINITY_DN2990_c3_g1(4.48637222765)
GO:0006260	DNA replication	biological process	7/234	11/681	0.04414	1	TRINITY_DN1577_c0_g1(-1.27109622825),TRINITY_DN2834_c2_g1(-1.88177373969),TRINITY_DN3034_c3_g2(-2.78869539746),TRINITY_DN3172_c3_g4(-1.50849298535),TRINITY_DN3311_c1_g2(-1.13281740221),TRINITY_DN3343_c1_g7(1.11505558557),TRINITY_DN3593_c3_g1(-1.127844984)	TRINITY_DN1577_c0_g1(-1.27109622825),TRINITY_DN2834_c2_g1(-1.88177373969),TRINITY_DN3034_c3_g2(-2.78869539746),TRINITY_DN3172_c3_g4(-1.50849298535),TRINITY_DN3311_c1_g2(-1.13281740221),TRINITY_DN3343_c1_g7(1.11505558557),TRINITY_DN3593_c3_g1(-1.127844984)
GO:0010959	regulation of metal ion transport	biological process	7/234	11/681	0.04414	1	TRINITY_DN1357_c0_g1(-2.55339730538),TRINITY_DN2677_c1_g2(1.75084897723),TRINITY_DN2991_c1_g2(-1.38723740444),TRINITY_DN3032_c1_g3(-1.81290474391),TRINITY_DN3130_c0_g1(-1.11371794823),TRINITY_DN3324_c1_g1(-1.19910771168),TRINITY_DN3757_c3_g4(2.45866702157)	TRINITY_DN1357_c0_g1(-2.55339730538),TRINITY_DN2677_c1_g2(1.75084897723),TRINITY_DN2991_c1_g2(-1.38723740444),TRINITY_DN3032_c1_g3(-1.81290474391),TRINITY_DN3130_c0_g1(-1.11371794823),TRINITY_DN3324_c1_g1(-1.19910771168),TRINITY_DN3757_c3_g4(2.45866702157)
GO:0032147	activation of protein kinase activity	biological process	7/234	11/681	0.04414	1	TRINITY_DN2618_c2_g3(1.16746035949),TRINITY_DN3135_c2_g3(1.84163748525),TRINITY_DN3238_c1_g1(4.68706194956),TRINITY_DN3355_c2_g2(-1.83919966724),TRINITY_DN3512_c0_g2(-1.87901474245),TRINITY_DN3656_c1_g1(-2.08721167236),TRINITY_DN3656_c1_g5(-3.02684114829)	TRINITY_DN2618_c2_g3(1.16746035949),TRINITY_DN3135_c2_g3(1.84163748525),TRINITY_DN3238_c1_g1(4.68706194956),TRINITY_DN3355_c2_g2(-1.83919966724),TRINITY_DN3512_c0_g2(-1.87901474245),TRINITY_DN3656_c1_g1(-2.08721167236),TRINITY_DN3656_c1_g5(-3.02684114829)
GO:0035082	axoneme assembly	biological process	7/234	11/681	0.04414	1	TRINITY_DN109_c0_g1(-2.43108989434),TRINITY_DN1245_c0_g2(-3.43593361414),TRINITY_DN2656_c0_g2(-4.58846026162),TRINITY_DN311_c0_g1(-3.06936398231),TRINITY_DN3282_c0_g4(1.20593803666),TRINITY_DN3526_c2_g3(-3.28668474605),TRINITY_DN99_c0_g1(-1.6657118923)	TRINITY_DN109_c0_g1(-2.43108989434),TRINITY_DN1245_c0_g2(-3.43593361414),TRINITY_DN2656_c0_g2(-4.58846026162),TRINITY_DN311_c0_g1(-3.06936398231),TRINITY_DN3282_c0_g4(1.20593803666),TRINITY_DN3526_c2_g3(-3.28668474605),TRINITY_DN99_c0_g1(-1.6657118923)
GO:1904062	regulation of cation transmembrane transport	biological process	7/234	11/681	0.04414	1	TRINITY_DN1357_c0_g1(-2.55339730538),TRINITY_DN2677_c1_g2(1.75084897723),TRINITY_DN2991_c1_g2(-1.38723740444),TRINITY_DN3032_c1_g3(-1.81290474391),TRINITY_DN3130_c0_g1(-1.11371794823),TRINITY_DN3324_c1_g1(-1.19910771168),TRINITY_DN3757_c3_g4(2.45866702157)	TRINITY_DN1357_c0_g1(-2.55339730538),TRINITY_DN2677_c1_g2(1.75084897723),TRINITY_DN2991_c1_g2(-1.38723740444),TRINITY_DN3032_c1_g3(-1.81290474391),TRINITY_DN3130_c0_g1(-1.11371794823),TRINITY_DN3324_c1_g1(-1.19910771168),TRINITY_DN3757_c3_g4(2.45866702157)
GO:0051050	positive regulation of transport	biological process	11/234	20/681	0.04428	1	TRINITY_DN1357_c0_g1(-2.55339730538),TRINITY_DN2559_c3_g1(-1.41187808043),TRINITY_DN2618_c2_g3(1.16746035949),TRINITY_DN2677_c1_g2(1.75084897723),TRINITY_DN2991_c1_g2(-1.38723740444),TRINITY_DN3032_c1_g3(-1.81290474391),TRINITY_DN3130_c0_g1(-1.11371794823),TRINITY_DN3512_c0_g2(-1.87901474245),TRINITY_DN3656_c1_g1(-2.08721167236),TRINITY_DN3656_c1_g5(-3.02684114829),TRINITY_DN3757_c3_g4(2.45866702…	TRINITY_DN1357_c0_g1(-2.55339730538),TRINITY_DN2559_c3_g1(-1.41187808043),TRINITY_DN2618_c2_g3(1.16746035949),TRINITY_DN2677_c1_g2(1.75084897723),TRINITY_DN2991_c1_g2(-1.38723740444),TRINITY_DN3032_c1_g3(-1.81290474391),TRINITY_DN3130_c0_g1(-1.11371794823),TRINITY_DN3512_c0_g2(-1.87901474245),TRINITY_DN3656_c1_g1(-2.08721167236),TRINITY_DN3656_c1_g5(-3.02684114829),TRINITY_DN3757_c3_g4(2.45866702…
GO:0010941	regulation of cell death	biological process	18/234	37/681	0.04642	1	TRINITY_DN1267_c0_g1(-3.74317437745),TRINITY_DN1551_c0_g1(-2.62773240149),TRINITY_DN2512_c2_g5(-3.78741905927),TRINITY_DN2618_c2_g3(1.16746035949),TRINITY_DN2948_c3_g2(-1.25152991183),TRINITY_DN2990_c3_g1(4.48637222765),TRINITY_DN3135_c2_g3(1.84163748525),TRINITY_DN3238_c1_g1(4.68706194956),TRINITY_DN3311_c1_g2(-1.13281740221),TRINITY_DN3344_c2_g2(-1.07984282302),TRINITY_DN3355_c2_g2(-1.839199667…	TRINITY_DN1267_c0_g1(-3.74317437745),TRINITY_DN1551_c0_g1(-2.62773240149),TRINITY_DN2512_c2_g5(-3.78741905927),TRINITY_DN2618_c2_g3(1.16746035949),TRINITY_DN2948_c3_g2(-1.25152991183),TRINITY_DN2990_c3_g1(4.48637222765),TRINITY_DN3135_c2_g3(1.84163748525),TRINITY_DN3238_c1_g1(4.68706194956),TRINITY_DN3311_c1_g2(-1.13281740221),TRINITY_DN3344_c2_g2(-1.07984282302),TRINITY_DN3355_c2_g2(-1.839199667…
GO:0000011	vacuole inheritance	biological process	4/234	5/681	0.04991	1	TRINITY_DN2618_c2_g3(1.16746035949),TRINITY_DN3512_c0_g2(-1.87901474245),TRINITY_DN3656_c1_g1(-2.08721167236),TRINITY_DN3656_c1_g5(-3.02684114829)	TRINITY_DN2618_c2_g3(1.16746035949),TRINITY_DN3512_c0_g2(-1.87901474245),TRINITY_DN3656_c1_g1(-2.08721167236),TRINITY_DN3656_c1_g5(-3.02684114829)
GO:0001410	chlamydospore formation	biological process	4/234	5/681	0.04991	1	TRINITY_DN2618_c2_g3(1.16746035949),TRINITY_DN3512_c0_g2(-1.87901474245),TRINITY_DN3656_c1_g1(-2.08721167236),TRINITY_DN3656_c1_g5(-3.02684114829)	TRINITY_DN2618_c2_g3(1.16746035949),TRINITY_DN3512_c0_g2(-1.87901474245),TRINITY_DN3656_c1_g1(-2.08721167236),TRINITY_DN3656_c1_g5(-3.02684114829)
GO:0002833	positive regulation of response to biotic stimulus	biological process	4/234	5/681	0.04991	1	TRINITY_DN2618_c2_g3(1.16746035949),TRINITY_DN3512_c0_g2(-1.87901474245),TRINITY_DN3656_c1_g1(-2.08721167236),TRINITY_DN3656_c1_g5(-3.02684114829)	TRINITY_DN2618_c2_g3(1.16746035949),TRINITY_DN3512_c0_g2(-1.87901474245),TRINITY_DN3656_c1_g1(-2.08721167236),TRINITY_DN3656_c1_g5(-3.02684114829)
GO:0007030	Golgi organization	biological process	4/234	5/681	0.04991	1	TRINITY_DN2244_c0_g1(-2.14833104305),TRINITY_DN2670_c0_g1(-1.16807489944),TRINITY_DN3118_c6_g1(-2.15189148233),TRINITY_DN3462_c3_g3(-1.43033070868)	TRINITY_DN2244_c0_g1(-2.14833104305),TRINITY_DN2670_c0_g1(-1.16807489944),TRINITY_DN3118_c6_g1(-2.15189148233),TRINITY_DN3462_c3_g3(-1.43033070868)
GO:0007096	regulation of exit from mitosis	biological process	4/234	5/681	0.04991	1	TRINITY_DN2618_c2_g3(1.16746035949),TRINITY_DN3512_c0_g2(-1.87901474245),TRINITY_DN3656_c1_g1(-2.08721167236),TRINITY_DN3656_c1_g5(-3.02684114829)	TRINITY_DN2618_c2_g3(1.16746035949),TRINITY_DN3512_c0_g2(-1.87901474245),TRINITY_DN3656_c1_g1(-2.08721167236),TRINITY_DN3656_c1_g5(-3.02684114829)
GO:0008347	glial cell migration	biological process	4/234	5/681	0.04991	1	TRINITY_DN2948_c3_g2(-1.25152991183),TRINITY_DN2990_c3_g1(4.48637222765),TRINITY_DN3344_c2_g2(-1.07984282302),TRINITY_DN3416_c0_g3(-1.06697066005)	TRINITY_DN2948_c3_g2(-1.25152991183),TRINITY_DN2990_c3_g1(4.48637222765),TRINITY_DN3344_c2_g2(-1.07984282302),TRINITY_DN3416_c0_g3(-1.06697066005)
GO:0009826	unidimensional cell growth	biological process	4/234	5/681	0.04991	1	TRINITY_DN2767_c3_g3(-1.67248354228),TRINITY_DN3034_c3_g2(-2.78869539746),TRINITY_DN3324_c1_g1(-1.19910771168),TRINITY_DN3496_c4_g3(-1.18941672544)	TRINITY_DN2767_c3_g3(-1.67248354228),TRINITY_DN3034_c3_g2(-2.78869539746),TRINITY_DN3324_c1_g1(-1.19910771168),TRINITY_DN3496_c4_g3(-1.18941672544)
GO:0010001	glial cell differentiation	biological process	4/234	5/681	0.04991	1	TRINITY_DN2948_c3_g2(-1.25152991183),TRINITY_DN2990_c3_g1(4.48637222765),TRINITY_DN3344_c2_g2(-1.07984282302),TRINITY_DN3416_c0_g3(-1.06697066005)	TRINITY_DN2948_c3_g2(-1.25152991183),TRINITY_DN2990_c3_g1(4.48637222765),TRINITY_DN3344_c2_g2(-1.07984282302),TRINITY_DN3416_c0_g3(-1.06697066005)
GO:0010570	regulation of filamentous growth	biological process	4/234	5/681	0.04991	1	TRINITY_DN2618_c2_g3(1.16746035949),TRINITY_DN3512_c0_g2(-1.87901474245),TRINITY_DN3656_c1_g1(-2.08721167236),TRINITY_DN3656_c1_g5(-3.02684114829)	TRINITY_DN2618_c2_g3(1.16746035949),TRINITY_DN3512_c0_g2(-1.87901474245),TRINITY_DN3656_c1_g1(-2.08721167236),TRINITY_DN3656_c1_g5(-3.02684114829)
GO:0015918	sterol transport	biological process	4/234	5/681	0.04991	1	TRINITY_DN2618_c2_g3(1.16746035949),TRINITY_DN3512_c0_g2(-1.87901474245),TRINITY_DN3656_c1_g1(-2.08721167236),TRINITY_DN3656_c1_g5(-3.02684114829)	TRINITY_DN2618_c2_g3(1.16746035949),TRINITY_DN3512_c0_g2(-1.87901474245),TRINITY_DN3656_c1_g1(-2.08721167236),TRINITY_DN3656_c1_g5(-3.02684114829)
GO:0019236	response to pheromone	biological process	4/234	5/681	0.04991	1	TRINITY_DN2618_c2_g3(1.16746035949),TRINITY_DN3512_c0_g2(-1.87901474245),TRINITY_DN3656_c1_g1(-2.08721167236),TRINITY_DN3656_c1_g5(-3.02684114829)	TRINITY_DN2618_c2_g3(1.16746035949),TRINITY_DN3512_c0_g2(-1.87901474245),TRINITY_DN3656_c1_g1(-2.08721167236),TRINITY_DN3656_c1_g5(-3.02684114829)
GO:0030436	asexual sporulation	biological process	4/234	5/681	0.04991	1	TRINITY_DN2618_c2_g3(1.16746035949),TRINITY_DN3512_c0_g2(-1.87901474245),TRINITY_DN3656_c1_g1(-2.08721167236),TRINITY_DN3656_c1_g5(-3.02684114829)	TRINITY_DN2618_c2_g3(1.16746035949),TRINITY_DN3512_c0_g2(-1.87901474245),TRINITY_DN3656_c1_g1(-2.08721167236),TRINITY_DN3656_c1_g5(-3.02684114829)
GO:0031106	septin ring organization	biological process	4/234	5/681	0.04991	1	TRINITY_DN2618_c2_g3(1.16746035949),TRINITY_DN3512_c0_g2(-1.87901474245),TRINITY_DN3656_c1_g1(-2.08721167236),TRINITY_DN3656_c1_g5(-3.02684114829)	TRINITY_DN2618_c2_g3(1.16746035949),TRINITY_DN3512_c0_g2(-1.87901474245),TRINITY_DN3656_c1_g1(-2.08721167236),TRINITY_DN3656_c1_g5(-3.02684114829)
GO:0032106	positive regulation of response to extracellular stimulus	biological process	4/234	5/681	0.04991	1	TRINITY_DN2618_c2_g3(1.16746035949),TRINITY_DN3512_c0_g2(-1.87901474245),TRINITY_DN3656_c1_g1(-2.08721167236),TRINITY_DN3656_c1_g5(-3.02684114829)	TRINITY_DN2618_c2_g3(1.16746035949),TRINITY_DN3512_c0_g2(-1.87901474245),TRINITY_DN3656_c1_g1(-2.08721167236),TRINITY_DN3656_c1_g5(-3.02684114829)
GO:0032109	positive regulation of response to nutrient levels	biological process	4/234	5/681	0.04991	1	TRINITY_DN2618_c2_g3(1.16746035949),TRINITY_DN3512_c0_g2(-1.87901474245),TRINITY_DN3656_c1_g1(-2.08721167236),TRINITY_DN3656_c1_g5(-3.02684114829)	TRINITY_DN2618_c2_g3(1.16746035949),TRINITY_DN3512_c0_g2(-1.87901474245),TRINITY_DN3656_c1_g1(-2.08721167236),TRINITY_DN3656_c1_g5(-3.02684114829)
GO:0032185	septin cytoskeleton organization	biological process	4/234	5/681	0.04991	1	TRINITY_DN2618_c2_g3(1.16746035949),TRINITY_DN3512_c0_g2(-1.87901474245),TRINITY_DN3656_c1_g1(-2.08721167236),TRINITY_DN3656_c1_g5(-3.02684114829)	TRINITY_DN2618_c2_g3(1.16746035949),TRINITY_DN3512_c0_g2(-1.87901474245),TRINITY_DN3656_c1_g1(-2.08721167236),TRINITY_DN3656_c1_g5(-3.02684114829)
GO:0032368	regulation of lipid transport	biological process	4/234	5/681	0.04991	1	TRINITY_DN2618_c2_g3(1.16746035949),TRINITY_DN3512_c0_g2(-1.87901474245),TRINITY_DN3656_c1_g1(-2.08721167236),TRINITY_DN3656_c1_g5(-3.02684114829)	TRINITY_DN2618_c2_g3(1.16746035949),TRINITY_DN3512_c0_g2(-1.87901474245),TRINITY_DN3656_c1_g1(-2.08721167236),TRINITY_DN3656_c1_g5(-3.02684114829)
GO:0032369	negative regulation of lipid transport	biological process	4/234	5/681	0.04991	1	TRINITY_DN2618_c2_g3(1.16746035949),TRINITY_DN3512_c0_g2(-1.87901474245),TRINITY_DN3656_c1_g1(-2.08721167236),TRINITY_DN3656_c1_g5(-3.02684114829)	TRINITY_DN2618_c2_g3(1.16746035949),TRINITY_DN3512_c0_g2(-1.87901474245),TRINITY_DN3656_c1_g1(-2.08721167236),TRINITY_DN3656_c1_g5(-3.02684114829)
GO:0032371	regulation of sterol transport	biological process	4/234	5/681	0.04991	1	TRINITY_DN2618_c2_g3(1.16746035949),TRINITY_DN3512_c0_g2(-1.87901474245),TRINITY_DN3656_c1_g1(-2.08721167236),TRINITY_DN3656_c1_g5(-3.02684114829)	TRINITY_DN2618_c2_g3(1.16746035949),TRINITY_DN3512_c0_g2(-1.87901474245),TRINITY_DN3656_c1_g1(-2.08721167236),TRINITY_DN3656_c1_g5(-3.02684114829)
GO:0032372	negative regulation of sterol transport	biological process	4/234	5/681	0.04991	1	TRINITY_DN2618_c2_g3(1.16746035949),TRINITY_DN3512_c0_g2(-1.87901474245),TRINITY_DN3656_c1_g1(-2.08721167236),TRINITY_DN3656_c1_g5(-3.02684114829)	TRINITY_DN2618_c2_g3(1.16746035949),TRINITY_DN3512_c0_g2(-1.87901474245),TRINITY_DN3656_c1_g1(-2.08721167236),TRINITY_DN3656_c1_g5(-3.02684114829)
GO:0035376	sterol import	biological process	4/234	5/681	0.04991	1	TRINITY_DN2618_c2_g3(1.16746035949),TRINITY_DN3512_c0_g2(-1.87901474245),TRINITY_DN3656_c1_g1(-2.08721167236),TRINITY_DN3656_c1_g5(-3.02684114829)	TRINITY_DN2618_c2_g3(1.16746035949),TRINITY_DN3512_c0_g2(-1.87901474245),TRINITY_DN3656_c1_g1(-2.08721167236),TRINITY_DN3656_c1_g5(-3.02684114829)
GO:0035968	regulation of sterol import by regulation of transcription from RNA polymerase II promoter	biological process	4/234	5/681	0.04991	1	TRINITY_DN2618_c2_g3(1.16746035949),TRINITY_DN3512_c0_g2(-1.87901474245),TRINITY_DN3656_c1_g1(-2.08721167236),TRINITY_DN3656_c1_g5(-3.02684114829)	TRINITY_DN2618_c2_g3(1.16746035949),TRINITY_DN3512_c0_g2(-1.87901474245),TRINITY_DN3656_c1_g1(-2.08721167236),TRINITY_DN3656_c1_g5(-3.02684114829)
GO:0036170	filamentous growth of a population of unicellular organisms in response to starvation	biological process	4/234	5/681	0.04991	1	TRINITY_DN2618_c2_g3(1.16746035949),TRINITY_DN3512_c0_g2(-1.87901474245),TRINITY_DN3656_c1_g1(-2.08721167236),TRINITY_DN3656_c1_g5(-3.02684114829)	TRINITY_DN2618_c2_g3(1.16746035949),TRINITY_DN3512_c0_g2(-1.87901474245),TRINITY_DN3656_c1_g1(-2.08721167236),TRINITY_DN3656_c1_g5(-3.02684114829)
GO:0042306	regulation of protein import into nucleus	biological process	4/234	5/681	0.04991	1	TRINITY_DN2618_c2_g3(1.16746035949),TRINITY_DN3512_c0_g2(-1.87901474245),TRINITY_DN3656_c1_g1(-2.08721167236),TRINITY_DN3656_c1_g5(-3.02684114829)	TRINITY_DN2618_c2_g3(1.16746035949),TRINITY_DN3512_c0_g2(-1.87901474245),TRINITY_DN3656_c1_g1(-2.08721167236),TRINITY_DN3656_c1_g5(-3.02684114829)
GO:0042307	positive regulation of protein import into nucleus	biological process	4/234	5/681	0.04991	1	TRINITY_DN2618_c2_g3(1.16746035949),TRINITY_DN3512_c0_g2(-1.87901474245),TRINITY_DN3656_c1_g1(-2.08721167236),TRINITY_DN3656_c1_g5(-3.02684114829)	TRINITY_DN2618_c2_g3(1.16746035949),TRINITY_DN3512_c0_g2(-1.87901474245),TRINITY_DN3656_c1_g1(-2.08721167236),TRINITY_DN3656_c1_g5(-3.02684114829)
GO:0043936	asexual sporulation resulting in formation of a cellular spore	biological process	4/234	5/681	0.04991	1	TRINITY_DN2618_c2_g3(1.16746035949),TRINITY_DN3512_c0_g2(-1.87901474245),TRINITY_DN3656_c1_g1(-2.08721167236),TRINITY_DN3656_c1_g5(-3.02684114829)	TRINITY_DN2618_c2_g3(1.16746035949),TRINITY_DN3512_c0_g2(-1.87901474245),TRINITY_DN3656_c1_g1(-2.08721167236),TRINITY_DN3656_c1_g5(-3.02684114829)
GO:0044111	development involved in symbiotic interaction	biological process	4/234	5/681	0.04991	1	TRINITY_DN2618_c2_g3(1.16746035949),TRINITY_DN3512_c0_g2(-1.87901474245),TRINITY_DN3656_c1_g1(-2.08721167236),TRINITY_DN3656_c1_g5(-3.02684114829)	TRINITY_DN2618_c2_g3(1.16746035949),TRINITY_DN3512_c0_g2(-1.87901474245),TRINITY_DN3656_c1_g1(-2.08721167236),TRINITY_DN3656_c1_g5(-3.02684114829)
GO:0044114	development of symbiont in host	biological process	4/234	5/681	0.04991	1	TRINITY_DN2618_c2_g3(1.16746035949),TRINITY_DN3512_c0_g2(-1.87901474245),TRINITY_DN3656_c1_g1(-2.08721167236),TRINITY_DN3656_c1_g5(-3.02684114829)	TRINITY_DN2618_c2_g3(1.16746035949),TRINITY_DN3512_c0_g2(-1.87901474245),TRINITY_DN3656_c1_g1(-2.08721167236),TRINITY_DN3656_c1_g5(-3.02684114829)
GO:0044115	development of symbiont involved in interaction with host	biological process	4/234	5/681	0.04991	1	TRINITY_DN2618_c2_g3(1.16746035949),TRINITY_DN3512_c0_g2(-1.87901474245),TRINITY_DN3656_c1_g1(-2.08721167236),TRINITY_DN3656_c1_g5(-3.02684114829)	TRINITY_DN2618_c2_g3(1.16746035949),TRINITY_DN3512_c0_g2(-1.87901474245),TRINITY_DN3656_c1_g1(-2.08721167236),TRINITY_DN3656_c1_g5(-3.02684114829)
GO:0046824	positive regulation of nucleocytoplasmic transport	biological process	4/234	5/681	0.04991	1	TRINITY_DN2618_c2_g3(1.16746035949),TRINITY_DN3512_c0_g2(-1.87901474245),TRINITY_DN3656_c1_g1(-2.08721167236),TRINITY_DN3656_c1_g5(-3.02684114829)	TRINITY_DN2618_c2_g3(1.16746035949),TRINITY_DN3512_c0_g2(-1.87901474245),TRINITY_DN3656_c1_g1(-2.08721167236),TRINITY_DN3656_c1_g5(-3.02684114829)
GO:0048308	organelle inheritance	biological process	4/234	5/681	0.04991	1	TRINITY_DN2618_c2_g3(1.16746035949),TRINITY_DN3512_c0_g2(-1.87901474245),TRINITY_DN3656_c1_g1(-2.08721167236),TRINITY_DN3656_c1_g5(-3.02684114829)	TRINITY_DN2618_c2_g3(1.16746035949),TRINITY_DN3512_c0_g2(-1.87901474245),TRINITY_DN3656_c1_g1(-2.08721167236),TRINITY_DN3656_c1_g5(-3.02684114829)
GO:0072367	regulation of lipid transport by regulation of transcription from RNA polymerase II promoter	biological process	4/234	5/681	0.04991	1	TRINITY_DN2618_c2_g3(1.16746035949),TRINITY_DN3512_c0_g2(-1.87901474245),TRINITY_DN3656_c1_g1(-2.08721167236),TRINITY_DN3656_c1_g5(-3.02684114829)	TRINITY_DN2618_c2_g3(1.16746035949),TRINITY_DN3512_c0_g2(-1.87901474245),TRINITY_DN3656_c1_g1(-2.08721167236),TRINITY_DN3656_c1_g5(-3.02684114829)
GO:0072368	regulation of lipid transport by negative regulation of transcription from RNA polymerase II promote...	biological process	4/234	5/681	0.04991	1	TRINITY_DN2618_c2_g3(1.16746035949),TRINITY_DN3512_c0_g2(-1.87901474245),TRINITY_DN3656_c1_g1(-2.08721167236),TRINITY_DN3656_c1_g5(-3.02684114829)	TRINITY_DN2618_c2_g3(1.16746035949),TRINITY_DN3512_c0_g2(-1.87901474245),TRINITY_DN3656_c1_g1(-2.08721167236),TRINITY_DN3656_c1_g5(-3.02684114829)
GO:0090033	positive regulation of filamentous growth	biological process	4/234	5/681	0.04991	1	TRINITY_DN2618_c2_g3(1.16746035949),TRINITY_DN3512_c0_g2(-1.87901474245),TRINITY_DN3656_c1_g1(-2.08721167236),TRINITY_DN3656_c1_g5(-3.02684114829)	TRINITY_DN2618_c2_g3(1.16746035949),TRINITY_DN3512_c0_g2(-1.87901474245),TRINITY_DN3656_c1_g1(-2.08721167236),TRINITY_DN3656_c1_g5(-3.02684114829)
GO:1900180	regulation of protein localization to nucleus	biological process	4/234	5/681	0.04991	1	TRINITY_DN2618_c2_g3(1.16746035949),TRINITY_DN3512_c0_g2(-1.87901474245),TRINITY_DN3656_c1_g1(-2.08721167236),TRINITY_DN3656_c1_g5(-3.02684114829)	TRINITY_DN2618_c2_g3(1.16746035949),TRINITY_DN3512_c0_g2(-1.87901474245),TRINITY_DN3656_c1_g1(-2.08721167236),TRINITY_DN3656_c1_g5(-3.02684114829)
GO:1900182	positive regulation of protein localization to nucleus	biological process	4/234	5/681	0.04991	1	TRINITY_DN2618_c2_g3(1.16746035949),TRINITY_DN3512_c0_g2(-1.87901474245),TRINITY_DN3656_c1_g1(-2.08721167236),TRINITY_DN3656_c1_g5(-3.02684114829)	TRINITY_DN2618_c2_g3(1.16746035949),TRINITY_DN3512_c0_g2(-1.87901474245),TRINITY_DN3656_c1_g1(-2.08721167236),TRINITY_DN3656_c1_g5(-3.02684114829)
GO:1900428	regulation of filamentous growth of a population of unicellular organisms	biological process	4/234	5/681	0.04991	1	TRINITY_DN2618_c2_g3(1.16746035949),TRINITY_DN3512_c0_g2(-1.87901474245),TRINITY_DN3656_c1_g1(-2.08721167236),TRINITY_DN3656_c1_g5(-3.02684114829)	TRINITY_DN2618_c2_g3(1.16746035949),TRINITY_DN3512_c0_g2(-1.87901474245),TRINITY_DN3656_c1_g1(-2.08721167236),TRINITY_DN3656_c1_g5(-3.02684114829)
GO:1900430	positive regulation of filamentous growth of a population of unicellular organisms	biological process	4/234	5/681	0.04991	1	TRINITY_DN2618_c2_g3(1.16746035949),TRINITY_DN3512_c0_g2(-1.87901474245),TRINITY_DN3656_c1_g1(-2.08721167236),TRINITY_DN3656_c1_g5(-3.02684114829)	TRINITY_DN2618_c2_g3(1.16746035949),TRINITY_DN3512_c0_g2(-1.87901474245),TRINITY_DN3656_c1_g1(-2.08721167236),TRINITY_DN3656_c1_g5(-3.02684114829)
GO:1900434	regulation of filamentous growth of a population of unicellular organisms in response to starvation	biological process	4/234	5/681	0.04991	1	TRINITY_DN2618_c2_g3(1.16746035949),TRINITY_DN3512_c0_g2(-1.87901474245),TRINITY_DN3656_c1_g1(-2.08721167236),TRINITY_DN3656_c1_g5(-3.02684114829)	TRINITY_DN2618_c2_g3(1.16746035949),TRINITY_DN3512_c0_g2(-1.87901474245),TRINITY_DN3656_c1_g1(-2.08721167236),TRINITY_DN3656_c1_g5(-3.02684114829)
GO:1900436	positive regulation of filamentous growth of a population of unicellular organisms in response to st...	biological process	4/234	5/681	0.04991	1	TRINITY_DN2618_c2_g3(1.16746035949),TRINITY_DN3512_c0_g2(-1.87901474245),TRINITY_DN3656_c1_g1(-2.08721167236),TRINITY_DN3656_c1_g5(-3.02684114829)	TRINITY_DN2618_c2_g3(1.16746035949),TRINITY_DN3512_c0_g2(-1.87901474245),TRINITY_DN3656_c1_g1(-2.08721167236),TRINITY_DN3656_c1_g5(-3.02684114829)
GO:1900443	regulation of filamentous growth of a population of unicellular organisms in response to biotic stim...	biological process	4/234	5/681	0.04991	1	TRINITY_DN2618_c2_g3(1.16746035949),TRINITY_DN3512_c0_g2(-1.87901474245),TRINITY_DN3656_c1_g1(-2.08721167236),TRINITY_DN3656_c1_g5(-3.02684114829)	TRINITY_DN2618_c2_g3(1.16746035949),TRINITY_DN3512_c0_g2(-1.87901474245),TRINITY_DN3656_c1_g1(-2.08721167236),TRINITY_DN3656_c1_g5(-3.02684114829)
GO:1900445	positive regulation of filamentous growth of a population of unicellular organisms in response to bi...	biological process	4/234	5/681	0.04991	1	TRINITY_DN2618_c2_g3(1.16746035949),TRINITY_DN3512_c0_g2(-1.87901474245),TRINITY_DN3656_c1_g1(-2.08721167236),TRINITY_DN3656_c1_g5(-3.02684114829)	TRINITY_DN2618_c2_g3(1.16746035949),TRINITY_DN3512_c0_g2(-1.87901474245),TRINITY_DN3656_c1_g1(-2.08721167236),TRINITY_DN3656_c1_g5(-3.02684114829)
GO:1904589	regulation of protein import	biological process	4/234	5/681	0.04991	1	TRINITY_DN2618_c2_g3(1.16746035949),TRINITY_DN3512_c0_g2(-1.87901474245),TRINITY_DN3656_c1_g1(-2.08721167236),TRINITY_DN3656_c1_g5(-3.02684114829)	TRINITY_DN2618_c2_g3(1.16746035949),TRINITY_DN3512_c0_g2(-1.87901474245),TRINITY_DN3656_c1_g1(-2.08721167236),TRINITY_DN3656_c1_g5(-3.02684114829)
GO:1904591	positive regulation of protein import	biological process	4/234	5/681	0.04991	1	TRINITY_DN2618_c2_g3(1.16746035949),TRINITY_DN3512_c0_g2(-1.87901474245),TRINITY_DN3656_c1_g1(-2.08721167236),TRINITY_DN3656_c1_g5(-3.02684114829)	TRINITY_DN2618_c2_g3(1.16746035949),TRINITY_DN3512_c0_g2(-1.87901474245),TRINITY_DN3656_c1_g1(-2.08721167236),TRINITY_DN3656_c1_g5(-3.02684114829)
GO:1905952	regulation of lipid localization	biological process	4/234	5/681	0.04991	1	TRINITY_DN2618_c2_g3(1.16746035949),TRINITY_DN3512_c0_g2(-1.87901474245),TRINITY_DN3656_c1_g1(-2.08721167236),TRINITY_DN3656_c1_g5(-3.02684114829)	TRINITY_DN2618_c2_g3(1.16746035949),TRINITY_DN3512_c0_g2(-1.87901474245),TRINITY_DN3656_c1_g1(-2.08721167236),TRINITY_DN3656_c1_g5(-3.02684114829)
GO:1905953	negative regulation of lipid localization	biological process	4/234	5/681	0.04991	1	TRINITY_DN2618_c2_g3(1.16746035949),TRINITY_DN3512_c0_g2(-1.87901474245),TRINITY_DN3656_c1_g1(-2.08721167236),TRINITY_DN3656_c1_g5(-3.02684114829)	TRINITY_DN2618_c2_g3(1.16746035949),TRINITY_DN3512_c0_g2(-1.87901474245),TRINITY_DN3656_c1_g1(-2.08721167236),TRINITY_DN3656_c1_g5(-3.02684114829)
GO:1990872	negative regulation of sterol import by negative regulation of transcription from RNA polymerase II ...	biological process	4/234	5/681	0.04991	1	TRINITY_DN2618_c2_g3(1.16746035949),TRINITY_DN3512_c0_g2(-1.87901474245),TRINITY_DN3656_c1_g1(-2.08721167236),TRINITY_DN3656_c1_g5(-3.02684114829)	TRINITY_DN2618_c2_g3(1.16746035949),TRINITY_DN3512_c0_g2(-1.87901474245),TRINITY_DN3656_c1_g1(-2.08721167236),TRINITY_DN3656_c1_g5(-3.02684114829)
GO:2000909	regulation of sterol import	biological process	4/234	5/681	0.04991	1	TRINITY_DN2618_c2_g3(1.16746035949),TRINITY_DN3512_c0_g2(-1.87901474245),TRINITY_DN3656_c1_g1(-2.08721167236),TRINITY_DN3656_c1_g5(-3.02684114829)	TRINITY_DN2618_c2_g3(1.16746035949),TRINITY_DN3512_c0_g2(-1.87901474245),TRINITY_DN3656_c1_g1(-2.08721167236),TRINITY_DN3656_c1_g5(-3.02684114829)
GO:2000910	negative regulation of sterol import	biological process	4/234	5/681	0.04991	1	TRINITY_DN2618_c2_g3(1.16746035949),TRINITY_DN3512_c0_g2(-1.87901474245),TRINITY_DN3656_c1_g1(-2.08721167236),TRINITY_DN3656_c1_g5(-3.02684114829)	TRINITY_DN2618_c2_g3(1.16746035949),TRINITY_DN3512_c0_g2(-1.87901474245),TRINITY_DN3656_c1_g1(-2.08721167236),TRINITY_DN3656_c1_g5(-3.02684114829)
GO:0009187	cyclic nucleotide metabolic process	biological process	5/234	7/681	0.05057	1	TRINITY_DN2638_c4_g1(-1.94308971346),TRINITY_DN2638_c4_g3(-1.69613457802),TRINITY_DN3032_c1_g3(-1.81290474391),TRINITY_DN3243_c2_g4(1.8219994837),TRINITY_DN886_c0_g1(3.44157379396)	TRINITY_DN2638_c4_g1(-1.94308971346),TRINITY_DN2638_c4_g3(-1.69613457802),TRINITY_DN3032_c1_g3(-1.81290474391),TRINITY_DN3243_c2_g4(1.8219994837),TRINITY_DN886_c0_g1(3.44157379396)
GO:0032103	positive regulation of response to external stimulus	biological process	5/234	7/681	0.05057	1	TRINITY_DN2618_c2_g3(1.16746035949),TRINITY_DN3032_c1_g3(-1.81290474391),TRINITY_DN3512_c0_g2(-1.87901474245),TRINITY_DN3656_c1_g1(-2.08721167236),TRINITY_DN3656_c1_g5(-3.02684114829)	TRINITY_DN2618_c2_g3(1.16746035949),TRINITY_DN3032_c1_g3(-1.81290474391),TRINITY_DN3512_c0_g2(-1.87901474245),TRINITY_DN3656_c1_g1(-2.08721167236),TRINITY_DN3656_c1_g5(-3.02684114829)
GO:1902358	sulfate transmembrane transport	biological process	5/234	7/681	0.05057	1	TRINITY_DN2823_c2_g4(-1.13639408501),TRINITY_DN3217_c0_g1(-4.26414724998),TRINITY_DN3217_c0_g2(-14.4886184371),TRINITY_DN3572_c0_g1(2.50846379256),TRINITY_DN3572_c0_g4(-1.01046578553)	TRINITY_DN2823_c2_g4(-1.13639408501),TRINITY_DN3217_c0_g1(-4.26414724998),TRINITY_DN3217_c0_g2(-14.4886184371),TRINITY_DN3572_c0_g1(2.50846379256),TRINITY_DN3572_c0_g4(-1.01046578553)
GO:1903829	positive regulation of cellular protein localization	biological process	5/234	7/681	0.05057	1	TRINITY_DN2618_c2_g3(1.16746035949),TRINITY_DN2990_c3_g1(4.48637222765),TRINITY_DN3512_c0_g2(-1.87901474245),TRINITY_DN3656_c1_g1(-2.08721167236),TRINITY_DN3656_c1_g5(-3.02684114829)	TRINITY_DN2618_c2_g3(1.16746035949),TRINITY_DN2990_c3_g1(4.48637222765),TRINITY_DN3512_c0_g2(-1.87901474245),TRINITY_DN3656_c1_g1(-2.08721167236),TRINITY_DN3656_c1_g5(-3.02684114829)
GO:0044419	interspecies interaction between organisms	biological process	9/234	16/681	0.05787	1	TRINITY_DN2244_c0_g1(-2.14833104305),TRINITY_DN2610_c4_g1(-1.54090835941),TRINITY_DN2618_c2_g3(1.16746035949),TRINITY_DN2670_c0_g1(-1.16807489944),TRINITY_DN2782_c0_g6(1.65399754879),TRINITY_DN3020_c4_g1(-1.1057580358),TRINITY_DN3512_c0_g2(-1.87901474245),TRINITY_DN3656_c1_g1(-2.08721167236),TRINITY_DN3656_c1_g5(-3.02684114829)	TRINITY_DN2244_c0_g1(-2.14833104305),TRINITY_DN2610_c4_g1(-1.54090835941),TRINITY_DN2618_c2_g3(1.16746035949),TRINITY_DN2670_c0_g1(-1.16807489944),TRINITY_DN2782_c0_g6(1.65399754879),TRINITY_DN3020_c4_g1(-1.1057580358),TRINITY_DN3512_c0_g2(-1.87901474245),TRINITY_DN3656_c1_g1(-2.08721167236),TRINITY_DN3656_c1_g5(-3.02684114829)
GO:0044772	mitotic cell cycle phase transition	biological process	9/234	16/681	0.05787	1	TRINITY_DN1577_c0_g1(-1.27109622825),TRINITY_DN2618_c2_g3(1.16746035949),TRINITY_DN2830_c1_g6(-2.81950059698),TRINITY_DN3285_c2_g1(-1.58640393684),TRINITY_DN3512_c0_g2(-1.87901474245),TRINITY_DN3520_c4_g1(1.22629129786),TRINITY_DN3656_c1_g1(-2.08721167236),TRINITY_DN3656_c1_g5(-3.02684114829),TRINITY_DN3688_c1_g7(-2.38640377363)	TRINITY_DN1577_c0_g1(-1.27109622825),TRINITY_DN2618_c2_g3(1.16746035949),TRINITY_DN2830_c1_g6(-2.81950059698),TRINITY_DN3285_c2_g1(-1.58640393684),TRINITY_DN3512_c0_g2(-1.87901474245),TRINITY_DN3520_c4_g1(1.22629129786),TRINITY_DN3656_c1_g1(-2.08721167236),TRINITY_DN3656_c1_g5(-3.02684114829),TRINITY_DN3688_c1_g7(-2.38640377363)
GO:0044782	cilium organization	biological process	9/234	16/681	0.05787	1	TRINITY_DN109_c0_g1(-2.43108989434),TRINITY_DN1245_c0_g2(-3.43593361414),TRINITY_DN1483_c0_g1(-2.10294444973),TRINITY_DN1551_c0_g1(-2.62773240149),TRINITY_DN2656_c0_g2(-4.58846026162),TRINITY_DN311_c0_g1(-3.06936398231),TRINITY_DN3282_c0_g4(1.20593803666),TRINITY_DN3526_c2_g3(-3.28668474605),TRINITY_DN99_c0_g1(-1.6657118923)	TRINITY_DN109_c0_g1(-2.43108989434),TRINITY_DN1245_c0_g2(-3.43593361414),TRINITY_DN1483_c0_g1(-2.10294444973),TRINITY_DN1551_c0_g1(-2.62773240149),TRINITY_DN2656_c0_g2(-4.58846026162),TRINITY_DN311_c0_g1(-3.06936398231),TRINITY_DN3282_c0_g4(1.20593803666),TRINITY_DN3526_c2_g3(-3.28668474605),TRINITY_DN99_c0_g1(-1.6657118923)
GO:0017144	drug metabolic process	biological process	27/234	61/681	0.06043	1	TRINITY_DN1427_c0_g1(-2.09599714025),TRINITY_DN1445_c0_g1(-3.12136795106),TRINITY_DN2274_c0_g1(2.02583650026),TRINITY_DN2301_c0_g1(2.37287805567),TRINITY_DN2512_c2_g5(-3.78741905927),TRINITY_DN2713_c2_g2(-1.10006926738),TRINITY_DN2713_c2_g4(-1.53848907314),TRINITY_DN2783_c0_g1(-2.27941690147),TRINITY_DN2783_c1_g1(-1.61743360107),TRINITY_DN2783_c1_g3(-1.17043571323),TRINITY_DN2900_c1_g1(-1.3835934…	TRINITY_DN1427_c0_g1(-2.09599714025),TRINITY_DN1445_c0_g1(-3.12136795106),TRINITY_DN2274_c0_g1(2.02583650026),TRINITY_DN2301_c0_g1(2.37287805567),TRINITY_DN2512_c2_g5(-3.78741905927),TRINITY_DN2713_c2_g2(-1.10006926738),TRINITY_DN2713_c2_g4(-1.53848907314),TRINITY_DN2783_c0_g1(-2.27941690147),TRINITY_DN2783_c1_g1(-1.61743360107),TRINITY_DN2783_c1_g3(-1.17043571323),TRINITY_DN2900_c1_g1(-1.3835934…
GO:0009968	negative regulation of signal transduction	biological process	8/234	14/681	0.06612	1	TRINITY_DN1896_c0_g1(-1.43122376696),TRINITY_DN2244_c0_g1(-2.14833104305),TRINITY_DN2512_c2_g5(-3.78741905927),TRINITY_DN2670_c0_g1(-1.16807489944),TRINITY_DN2863_c0_g2(-1.17670982061),TRINITY_DN2948_c3_g2(-1.25152991183),TRINITY_DN3344_c2_g2(-1.07984282302),TRINITY_DN3416_c0_g3(-1.06697066005)	TRINITY_DN1896_c0_g1(-1.43122376696),TRINITY_DN2244_c0_g1(-2.14833104305),TRINITY_DN2512_c2_g5(-3.78741905927),TRINITY_DN2670_c0_g1(-1.16807489944),TRINITY_DN2863_c0_g2(-1.17670982061),TRINITY_DN2948_c3_g2(-1.25152991183),TRINITY_DN3344_c2_g2(-1.07984282302),TRINITY_DN3416_c0_g3(-1.06697066005)
GO:0033674	positive regulation of kinase activity	biological process	8/234	14/681	0.06612	1	TRINITY_DN1551_c0_g1(-2.62773240149),TRINITY_DN2618_c2_g3(1.16746035949),TRINITY_DN3135_c2_g3(1.84163748525),TRINITY_DN3238_c1_g1(4.68706194956),TRINITY_DN3355_c2_g2(-1.83919966724),TRINITY_DN3512_c0_g2(-1.87901474245),TRINITY_DN3656_c1_g1(-2.08721167236),TRINITY_DN3656_c1_g5(-3.02684114829)	TRINITY_DN1551_c0_g1(-2.62773240149),TRINITY_DN2618_c2_g3(1.16746035949),TRINITY_DN3135_c2_g3(1.84163748525),TRINITY_DN3238_c1_g1(4.68706194956),TRINITY_DN3355_c2_g2(-1.83919966724),TRINITY_DN3512_c0_g2(-1.87901474245),TRINITY_DN3656_c1_g1(-2.08721167236),TRINITY_DN3656_c1_g5(-3.02684114829)
GO:0140014	mitotic nuclear division	biological process	8/234	14/681	0.06612	1	TRINITY_DN2618_c2_g3(1.16746035949),TRINITY_DN2674_c3_g1(-1.20247600187),TRINITY_DN2830_c1_g6(-2.81950059698),TRINITY_DN3368_c3_g3(-1.35865189413),TRINITY_DN3512_c0_g2(-1.87901474245),TRINITY_DN3656_c1_g1(-2.08721167236),TRINITY_DN3656_c1_g5(-3.02684114829),TRINITY_DN3688_c1_g7(-2.38640377363)	TRINITY_DN2618_c2_g3(1.16746035949),TRINITY_DN2674_c3_g1(-1.20247600187),TRINITY_DN2830_c1_g6(-2.81950059698),TRINITY_DN3368_c3_g3(-1.35865189413),TRINITY_DN3512_c0_g2(-1.87901474245),TRINITY_DN3656_c1_g1(-2.08721167236),TRINITY_DN3656_c1_g5(-3.02684114829),TRINITY_DN3688_c1_g7(-2.38640377363)
GO:1901990	regulation of mitotic cell cycle phase transition	biological process	8/234	14/681	0.06612	1	TRINITY_DN1577_c0_g1(-1.27109622825),TRINITY_DN2618_c2_g3(1.16746035949),TRINITY_DN2830_c1_g6(-2.81950059698),TRINITY_DN3285_c2_g1(-1.58640393684),TRINITY_DN3512_c0_g2(-1.87901474245),TRINITY_DN3656_c1_g1(-2.08721167236),TRINITY_DN3656_c1_g5(-3.02684114829),TRINITY_DN3688_c1_g7(-2.38640377363)	TRINITY_DN1577_c0_g1(-1.27109622825),TRINITY_DN2618_c2_g3(1.16746035949),TRINITY_DN2830_c1_g6(-2.81950059698),TRINITY_DN3285_c2_g1(-1.58640393684),TRINITY_DN3512_c0_g2(-1.87901474245),TRINITY_DN3656_c1_g1(-2.08721167236),TRINITY_DN3656_c1_g5(-3.02684114829),TRINITY_DN3688_c1_g7(-2.38640377363)
GO:1901565	organonitrogen compound catabolic process	biological process	31/234	72/681	0.06679	1	TRINITY_DN1427_c0_g1(-2.09599714025),TRINITY_DN1445_c0_g1(-3.12136795106),TRINITY_DN1568_c0_g1(-1.33754060427),TRINITY_DN2301_c0_g1(2.37287805567),TRINITY_DN2481_c5_g1(-1.72793019786),TRINITY_DN2670_c2_g6(-1.02619526061),TRINITY_DN2713_c2_g2(-1.10006926738),TRINITY_DN2713_c2_g4(-1.53848907314),TRINITY_DN2783_c0_g1(-2.27941690147),TRINITY_DN2783_c1_g1(-1.61743360107),TRINITY_DN2783_c1_g3(-1.170435…	TRINITY_DN1427_c0_g1(-2.09599714025),TRINITY_DN1445_c0_g1(-3.12136795106),TRINITY_DN1568_c0_g1(-1.33754060427),TRINITY_DN2301_c0_g1(2.37287805567),TRINITY_DN2481_c5_g1(-1.72793019786),TRINITY_DN2670_c2_g6(-1.02619526061),TRINITY_DN2713_c2_g2(-1.10006926738),TRINITY_DN2713_c2_g4(-1.53848907314),TRINITY_DN2783_c0_g1(-2.27941690147),TRINITY_DN2783_c1_g1(-1.61743360107),TRINITY_DN2783_c1_g3(-1.170435…
GO:0040007	growth	biological process	17/234	36/681	0.07027	1	TRINITY_DN1551_c0_g1(-2.62773240149),TRINITY_DN2512_c2_g5(-3.78741905927),TRINITY_DN2610_c4_g1(-1.54090835941),TRINITY_DN2618_c2_g3(1.16746035949),TRINITY_DN2767_c3_g3(-1.67248354228),TRINITY_DN2948_c3_g2(-1.25152991183),TRINITY_DN2990_c3_g1(4.48637222765),TRINITY_DN3034_c3_g2(-2.78869539746),TRINITY_DN3311_c1_g2(-1.13281740221),TRINITY_DN3324_c1_g1(-1.19910771168),TRINITY_DN3344_c2_g2(-1.0798428…	TRINITY_DN1551_c0_g1(-2.62773240149),TRINITY_DN2512_c2_g5(-3.78741905927),TRINITY_DN2610_c4_g1(-1.54090835941),TRINITY_DN2618_c2_g3(1.16746035949),TRINITY_DN2767_c3_g3(-1.67248354228),TRINITY_DN2948_c3_g2(-1.25152991183),TRINITY_DN2990_c3_g1(4.48637222765),TRINITY_DN3034_c3_g2(-2.78869539746),TRINITY_DN3311_c1_g2(-1.13281740221),TRINITY_DN3324_c1_g1(-1.19910771168),TRINITY_DN3344_c2_g2(-1.0798428…
GO:0000165	MAPK cascade	biological process	7/234	12/681	0.07548	1	TRINITY_DN2618_c2_g3(1.16746035949),TRINITY_DN3135_c2_g3(1.84163748525),TRINITY_DN3238_c1_g1(4.68706194956),TRINITY_DN3355_c2_g2(-1.83919966724),TRINITY_DN3512_c0_g2(-1.87901474245),TRINITY_DN3656_c1_g1(-2.08721167236),TRINITY_DN3656_c1_g5(-3.02684114829)	TRINITY_DN2618_c2_g3(1.16746035949),TRINITY_DN3135_c2_g3(1.84163748525),TRINITY_DN3238_c1_g1(4.68706194956),TRINITY_DN3355_c2_g2(-1.83919966724),TRINITY_DN3512_c0_g2(-1.87901474245),TRINITY_DN3656_c1_g1(-2.08721167236),TRINITY_DN3656_c1_g5(-3.02684114829)
GO:0023014	signal transduction by protein phosphorylation	biological process	7/234	12/681	0.07548	1	TRINITY_DN2618_c2_g3(1.16746035949),TRINITY_DN3135_c2_g3(1.84163748525),TRINITY_DN3238_c1_g1(4.68706194956),TRINITY_DN3355_c2_g2(-1.83919966724),TRINITY_DN3512_c0_g2(-1.87901474245),TRINITY_DN3656_c1_g1(-2.08721167236),TRINITY_DN3656_c1_g5(-3.02684114829)	TRINITY_DN2618_c2_g3(1.16746035949),TRINITY_DN3135_c2_g3(1.84163748525),TRINITY_DN3238_c1_g1(4.68706194956),TRINITY_DN3355_c2_g2(-1.83919966724),TRINITY_DN3512_c0_g2(-1.87901474245),TRINITY_DN3656_c1_g1(-2.08721167236),TRINITY_DN3656_c1_g5(-3.02684114829)
GO:0043408	regulation of MAPK cascade	biological process	7/234	12/681	0.07548	1	TRINITY_DN2618_c2_g3(1.16746035949),TRINITY_DN3135_c2_g3(1.84163748525),TRINITY_DN3238_c1_g1(4.68706194956),TRINITY_DN3355_c2_g2(-1.83919966724),TRINITY_DN3512_c0_g2(-1.87901474245),TRINITY_DN3656_c1_g1(-2.08721167236),TRINITY_DN3656_c1_g5(-3.02684114829)	TRINITY_DN2618_c2_g3(1.16746035949),TRINITY_DN3135_c2_g3(1.84163748525),TRINITY_DN3238_c1_g1(4.68706194956),TRINITY_DN3355_c2_g2(-1.83919966724),TRINITY_DN3512_c0_g2(-1.87901474245),TRINITY_DN3656_c1_g1(-2.08721167236),TRINITY_DN3656_c1_g5(-3.02684114829)
GO:0071897	DNA biosynthetic process	biological process	7/234	12/681	0.07548	1	TRINITY_DN1268_c0_g1(-2.06811775799),TRINITY_DN1577_c0_g1(-1.27109622825),TRINITY_DN3160_c3_g6(1.13017127252),TRINITY_DN3311_c1_g2(-1.13281740221),TRINITY_DN3368_c3_g4(-1.07708134491),TRINITY_DN3569_c7_g1(-1.71456957864),TRINITY_DN3593_c3_g1(-1.127844984)	TRINITY_DN1268_c0_g1(-2.06811775799),TRINITY_DN1577_c0_g1(-1.27109622825),TRINITY_DN3160_c3_g6(1.13017127252),TRINITY_DN3311_c1_g2(-1.13281740221),TRINITY_DN3368_c3_g4(-1.07708134491),TRINITY_DN3569_c7_g1(-1.71456957864),TRINITY_DN3593_c3_g1(-1.127844984)
GO:0072348	sulfur compound transport	biological process	7/234	12/681	0.07548	1	TRINITY_DN1269_c0_g1(-2.69702190868),TRINITY_DN2823_c2_g4(-1.13639408501),TRINITY_DN2848_c1_g1(1.48364203419),TRINITY_DN3217_c0_g1(-4.26414724998),TRINITY_DN3217_c0_g2(-14.4886184371),TRINITY_DN3572_c0_g1(2.50846379256),TRINITY_DN3572_c0_g4(-1.01046578553)	TRINITY_DN1269_c0_g1(-2.69702190868),TRINITY_DN2823_c2_g4(-1.13639408501),TRINITY_DN2848_c1_g1(1.48364203419),TRINITY_DN3217_c0_g1(-4.26414724998),TRINITY_DN3217_c0_g2(-14.4886184371),TRINITY_DN3572_c0_g1(2.50846379256),TRINITY_DN3572_c0_g4(-1.01046578553)
GO:0009057	macromolecule catabolic process	biological process	35/234	84/681	0.08446	1	TRINITY_DN1427_c0_g1(-2.09599714025),TRINITY_DN1445_c0_g1(-3.12136795106),TRINITY_DN1568_c0_g1(-1.33754060427),TRINITY_DN2301_c0_g1(2.37287805567),TRINITY_DN2670_c2_g6(-1.02619526061),TRINITY_DN2713_c2_g2(-1.10006926738),TRINITY_DN2713_c2_g4(-1.53848907314),TRINITY_DN2783_c0_g1(-2.27941690147),TRINITY_DN2783_c1_g1(-1.61743360107),TRINITY_DN2783_c1_g3(-1.17043571323),TRINITY_DN2830_c1_g6(-2.819500…	TRINITY_DN1427_c0_g1(-2.09599714025),TRINITY_DN1445_c0_g1(-3.12136795106),TRINITY_DN1568_c0_g1(-1.33754060427),TRINITY_DN2301_c0_g1(2.37287805567),TRINITY_DN2670_c2_g6(-1.02619526061),TRINITY_DN2713_c2_g2(-1.10006926738),TRINITY_DN2713_c2_g4(-1.53848907314),TRINITY_DN2783_c0_g1(-2.27941690147),TRINITY_DN2783_c1_g1(-1.61743360107),TRINITY_DN2783_c1_g3(-1.17043571323),TRINITY_DN2830_c1_g6(-2.819500…
GO:0007088	regulation of mitotic nuclear division	biological process	6/234	10/681	0.08601	1	TRINITY_DN2618_c2_g3(1.16746035949),TRINITY_DN2830_c1_g6(-2.81950059698),TRINITY_DN3512_c0_g2(-1.87901474245),TRINITY_DN3656_c1_g1(-2.08721167236),TRINITY_DN3656_c1_g5(-3.02684114829),TRINITY_DN3688_c1_g7(-2.38640377363)	TRINITY_DN2618_c2_g3(1.16746035949),TRINITY_DN2830_c1_g6(-2.81950059698),TRINITY_DN3512_c0_g2(-1.87901474245),TRINITY_DN3656_c1_g1(-2.08721167236),TRINITY_DN3656_c1_g5(-3.02684114829),TRINITY_DN3688_c1_g7(-2.38640377363)
GO:0022898	regulation of transmembrane transporter activity	biological process	6/234	10/681	0.08601	1	TRINITY_DN1357_c0_g1(-2.55339730538),TRINITY_DN2677_c1_g2(1.75084897723),TRINITY_DN2991_c1_g2(-1.38723740444),TRINITY_DN3130_c0_g1(-1.11371794823),TRINITY_DN3324_c1_g1(-1.19910771168),TRINITY_DN3757_c3_g4(2.45866702157)	TRINITY_DN1357_c0_g1(-2.55339730538),TRINITY_DN2677_c1_g2(1.75084897723),TRINITY_DN2991_c1_g2(-1.38723740444),TRINITY_DN3130_c0_g1(-1.11371794823),TRINITY_DN3324_c1_g1(-1.19910771168),TRINITY_DN3757_c3_g4(2.45866702157)
GO:0032409	regulation of transporter activity	biological process	6/234	10/681	0.08601	1	TRINITY_DN1357_c0_g1(-2.55339730538),TRINITY_DN2677_c1_g2(1.75084897723),TRINITY_DN2991_c1_g2(-1.38723740444),TRINITY_DN3130_c0_g1(-1.11371794823),TRINITY_DN3324_c1_g1(-1.19910771168),TRINITY_DN3757_c3_g4(2.45866702157)	TRINITY_DN1357_c0_g1(-2.55339730538),TRINITY_DN2677_c1_g2(1.75084897723),TRINITY_DN2991_c1_g2(-1.38723740444),TRINITY_DN3130_c0_g1(-1.11371794823),TRINITY_DN3324_c1_g1(-1.19910771168),TRINITY_DN3757_c3_g4(2.45866702157)
GO:0032412	regulation of ion transmembrane transporter activity	biological process	6/234	10/681	0.08601	1	TRINITY_DN1357_c0_g1(-2.55339730538),TRINITY_DN2677_c1_g2(1.75084897723),TRINITY_DN2991_c1_g2(-1.38723740444),TRINITY_DN3130_c0_g1(-1.11371794823),TRINITY_DN3324_c1_g1(-1.19910771168),TRINITY_DN3757_c3_g4(2.45866702157)	TRINITY_DN1357_c0_g1(-2.55339730538),TRINITY_DN2677_c1_g2(1.75084897723),TRINITY_DN2991_c1_g2(-1.38723740444),TRINITY_DN3130_c0_g1(-1.11371794823),TRINITY_DN3324_c1_g1(-1.19910771168),TRINITY_DN3757_c3_g4(2.45866702157)
GO:0034764	positive regulation of transmembrane transport	biological process	6/234	10/681	0.08601	1	TRINITY_DN1357_c0_g1(-2.55339730538),TRINITY_DN2677_c1_g2(1.75084897723),TRINITY_DN2991_c1_g2(-1.38723740444),TRINITY_DN3032_c1_g3(-1.81290474391),TRINITY_DN3130_c0_g1(-1.11371794823),TRINITY_DN3757_c3_g4(2.45866702157)	TRINITY_DN1357_c0_g1(-2.55339730538),TRINITY_DN2677_c1_g2(1.75084897723),TRINITY_DN2991_c1_g2(-1.38723740444),TRINITY_DN3032_c1_g3(-1.81290474391),TRINITY_DN3130_c0_g1(-1.11371794823),TRINITY_DN3757_c3_g4(2.45866702157)
GO:0034767	positive regulation of ion transmembrane transport	biological process	6/234	10/681	0.08601	1	TRINITY_DN1357_c0_g1(-2.55339730538),TRINITY_DN2677_c1_g2(1.75084897723),TRINITY_DN2991_c1_g2(-1.38723740444),TRINITY_DN3032_c1_g3(-1.81290474391),TRINITY_DN3130_c0_g1(-1.11371794823),TRINITY_DN3757_c3_g4(2.45866702157)	TRINITY_DN1357_c0_g1(-2.55339730538),TRINITY_DN2677_c1_g2(1.75084897723),TRINITY_DN2991_c1_g2(-1.38723740444),TRINITY_DN3032_c1_g3(-1.81290474391),TRINITY_DN3130_c0_g1(-1.11371794823),TRINITY_DN3757_c3_g4(2.45866702157)
GO:0043266	regulation of potassium ion transport	biological process	6/234	10/681	0.08601	1	TRINITY_DN1357_c0_g1(-2.55339730538),TRINITY_DN2677_c1_g2(1.75084897723),TRINITY_DN2991_c1_g2(-1.38723740444),TRINITY_DN3130_c0_g1(-1.11371794823),TRINITY_DN3324_c1_g1(-1.19910771168),TRINITY_DN3757_c3_g4(2.45866702157)	TRINITY_DN1357_c0_g1(-2.55339730538),TRINITY_DN2677_c1_g2(1.75084897723),TRINITY_DN2991_c1_g2(-1.38723740444),TRINITY_DN3130_c0_g1(-1.11371794823),TRINITY_DN3324_c1_g1(-1.19910771168),TRINITY_DN3757_c3_g4(2.45866702157)
GO:0043270	positive regulation of ion transport	biological process	6/234	10/681	0.08601	1	TRINITY_DN1357_c0_g1(-2.55339730538),TRINITY_DN2677_c1_g2(1.75084897723),TRINITY_DN2991_c1_g2(-1.38723740444),TRINITY_DN3032_c1_g3(-1.81290474391),TRINITY_DN3130_c0_g1(-1.11371794823),TRINITY_DN3757_c3_g4(2.45866702157)	TRINITY_DN1357_c0_g1(-2.55339730538),TRINITY_DN2677_c1_g2(1.75084897723),TRINITY_DN2991_c1_g2(-1.38723740444),TRINITY_DN3032_c1_g3(-1.81290474391),TRINITY_DN3130_c0_g1(-1.11371794823),TRINITY_DN3757_c3_g4(2.45866702157)
GO:0051783	regulation of nuclear division	biological process	6/234	10/681	0.08601	1	TRINITY_DN2618_c2_g3(1.16746035949),TRINITY_DN2830_c1_g6(-2.81950059698),TRINITY_DN3512_c0_g2(-1.87901474245),TRINITY_DN3656_c1_g1(-2.08721167236),TRINITY_DN3656_c1_g5(-3.02684114829),TRINITY_DN3688_c1_g7(-2.38640377363)	TRINITY_DN2618_c2_g3(1.16746035949),TRINITY_DN2830_c1_g6(-2.81950059698),TRINITY_DN3512_c0_g2(-1.87901474245),TRINITY_DN3656_c1_g1(-2.08721167236),TRINITY_DN3656_c1_g5(-3.02684114829),TRINITY_DN3688_c1_g7(-2.38640377363)
GO:1901016	regulation of potassium ion transmembrane transporter activity	biological process	6/234	10/681	0.08601	1	TRINITY_DN1357_c0_g1(-2.55339730538),TRINITY_DN2677_c1_g2(1.75084897723),TRINITY_DN2991_c1_g2(-1.38723740444),TRINITY_DN3130_c0_g1(-1.11371794823),TRINITY_DN3324_c1_g1(-1.19910771168),TRINITY_DN3757_c3_g4(2.45866702157)	TRINITY_DN1357_c0_g1(-2.55339730538),TRINITY_DN2677_c1_g2(1.75084897723),TRINITY_DN2991_c1_g2(-1.38723740444),TRINITY_DN3130_c0_g1(-1.11371794823),TRINITY_DN3324_c1_g1(-1.19910771168),TRINITY_DN3757_c3_g4(2.45866702157)
GO:1901379	regulation of potassium ion transmembrane transport	biological process	6/234	10/681	0.08601	1	TRINITY_DN1357_c0_g1(-2.55339730538),TRINITY_DN2677_c1_g2(1.75084897723),TRINITY_DN2991_c1_g2(-1.38723740444),TRINITY_DN3130_c0_g1(-1.11371794823),TRINITY_DN3324_c1_g1(-1.19910771168),TRINITY_DN3757_c3_g4(2.45866702157)	TRINITY_DN1357_c0_g1(-2.55339730538),TRINITY_DN2677_c1_g2(1.75084897723),TRINITY_DN2991_c1_g2(-1.38723740444),TRINITY_DN3130_c0_g1(-1.11371794823),TRINITY_DN3324_c1_g1(-1.19910771168),TRINITY_DN3757_c3_g4(2.45866702157)
GO:1903827	regulation of cellular protein localization	biological process	6/234	10/681	0.08601	1	TRINITY_DN2618_c2_g3(1.16746035949),TRINITY_DN2990_c3_g1(4.48637222765),TRINITY_DN3032_c1_g3(-1.81290474391),TRINITY_DN3512_c0_g2(-1.87901474245),TRINITY_DN3656_c1_g1(-2.08721167236),TRINITY_DN3656_c1_g5(-3.02684114829)	TRINITY_DN2618_c2_g3(1.16746035949),TRINITY_DN2990_c3_g1(4.48637222765),TRINITY_DN3032_c1_g3(-1.81290474391),TRINITY_DN3512_c0_g2(-1.87901474245),TRINITY_DN3656_c1_g1(-2.08721167236),TRINITY_DN3656_c1_g5(-3.02684114829)
GO:1904064	positive regulation of cation transmembrane transport	biological process	6/234	10/681	0.08601	1	TRINITY_DN1357_c0_g1(-2.55339730538),TRINITY_DN2677_c1_g2(1.75084897723),TRINITY_DN2991_c1_g2(-1.38723740444),TRINITY_DN3032_c1_g3(-1.81290474391),TRINITY_DN3130_c0_g1(-1.11371794823),TRINITY_DN3757_c3_g4(2.45866702157)	TRINITY_DN1357_c0_g1(-2.55339730538),TRINITY_DN2677_c1_g2(1.75084897723),TRINITY_DN2991_c1_g2(-1.38723740444),TRINITY_DN3032_c1_g3(-1.81290474391),TRINITY_DN3130_c0_g1(-1.11371794823),TRINITY_DN3757_c3_g4(2.45866702157)
GO:2001257	regulation of cation channel activity	biological process	6/234	10/681	0.08601	1	TRINITY_DN1357_c0_g1(-2.55339730538),TRINITY_DN2677_c1_g2(1.75084897723),TRINITY_DN2991_c1_g2(-1.38723740444),TRINITY_DN3130_c0_g1(-1.11371794823),TRINITY_DN3324_c1_g1(-1.19910771168),TRINITY_DN3757_c3_g4(2.45866702157)	TRINITY_DN1357_c0_g1(-2.55339730538),TRINITY_DN2677_c1_g2(1.75084897723),TRINITY_DN2991_c1_g2(-1.38723740444),TRINITY_DN3130_c0_g1(-1.11371794823),TRINITY_DN3324_c1_g1(-1.19910771168),TRINITY_DN3757_c3_g4(2.45866702157)
GO:0007018	microtubule-based movement	biological process	9/234	17/681	0.08697	1	TRINITY_DN109_c0_g1(-2.43108989434),TRINITY_DN1245_c0_g2(-3.43593361414),TRINITY_DN1483_c0_g1(-2.10294444973),TRINITY_DN2594_c2_g3(-1.36851091336),TRINITY_DN2639_c3_g4(-1.71335820389),TRINITY_DN2656_c0_g2(-4.58846026162),TRINITY_DN3368_c3_g3(-1.35865189413),TRINITY_DN3526_c2_g3(-3.28668474605),TRINITY_DN99_c0_g1(-1.6657118923)	TRINITY_DN109_c0_g1(-2.43108989434),TRINITY_DN1245_c0_g2(-3.43593361414),TRINITY_DN1483_c0_g1(-2.10294444973),TRINITY_DN2594_c2_g3(-1.36851091336),TRINITY_DN2639_c3_g4(-1.71335820389),TRINITY_DN2656_c0_g2(-4.58846026162),TRINITY_DN3368_c3_g3(-1.35865189413),TRINITY_DN3526_c2_g3(-3.28668474605),TRINITY_DN99_c0_g1(-1.6657118923)
GO:0044770	cell cycle phase transition	biological process	9/234	17/681	0.08697	1	TRINITY_DN1577_c0_g1(-1.27109622825),TRINITY_DN2618_c2_g3(1.16746035949),TRINITY_DN2830_c1_g6(-2.81950059698),TRINITY_DN3285_c2_g1(-1.58640393684),TRINITY_DN3512_c0_g2(-1.87901474245),TRINITY_DN3520_c4_g1(1.22629129786),TRINITY_DN3656_c1_g1(-2.08721167236),TRINITY_DN3656_c1_g5(-3.02684114829),TRINITY_DN3688_c1_g7(-2.38640377363)	TRINITY_DN1577_c0_g1(-1.27109622825),TRINITY_DN2618_c2_g3(1.16746035949),TRINITY_DN2830_c1_g6(-2.81950059698),TRINITY_DN3285_c2_g1(-1.58640393684),TRINITY_DN3512_c0_g2(-1.87901474245),TRINITY_DN3520_c4_g1(1.22629129786),TRINITY_DN3656_c1_g1(-2.08721167236),TRINITY_DN3656_c1_g5(-3.02684114829),TRINITY_DN3688_c1_g7(-2.38640377363)
GO:0045087	innate immune response	biological process	9/234	17/681	0.08697	1	TRINITY_DN1453_c0_g1(-2.82693098456),TRINITY_DN2506_c1_g2(2.69390264406),TRINITY_DN2638_c4_g1(-1.94308971346),TRINITY_DN2638_c4_g3(-1.69613457802),TRINITY_DN2670_c2_g4(-1.43011048969),TRINITY_DN2727_c2_g2(2.80700894859),TRINITY_DN3243_c2_g4(1.8219994837),TRINITY_DN3667_c3_g3(-1.03216184042),TRINITY_DN886_c0_g1(3.44157379396)	TRINITY_DN1453_c0_g1(-2.82693098456),TRINITY_DN2506_c1_g2(2.69390264406),TRINITY_DN2638_c4_g1(-1.94308971346),TRINITY_DN2638_c4_g3(-1.69613457802),TRINITY_DN2670_c2_g4(-1.43011048969),TRINITY_DN2727_c2_g2(2.80700894859),TRINITY_DN3243_c2_g4(1.8219994837),TRINITY_DN3667_c3_g3(-1.03216184042),TRINITY_DN886_c0_g1(3.44157379396)
GO:0007010	cytoskeleton organization	biological process	19/234	42/681	0.08782	1	TRINITY_DN109_c0_g1(-2.43108989434),TRINITY_DN1245_c0_g2(-3.43593361414),TRINITY_DN1551_c0_g1(-2.62773240149),TRINITY_DN2618_c2_g3(1.16746035949),TRINITY_DN2624_c3_g2(-1.7395971044),TRINITY_DN2656_c0_g2(-4.58846026162),TRINITY_DN2881_c4_g1(-2.13230653776),TRINITY_DN311_c0_g1(-3.06936398231),TRINITY_DN3135_c2_g3(1.84163748525),TRINITY_DN3238_c1_g1(4.68706194956),TRINITY_DN3282_c0_g4(1.20593803666)…	TRINITY_DN109_c0_g1(-2.43108989434),TRINITY_DN1245_c0_g2(-3.43593361414),TRINITY_DN1551_c0_g1(-2.62773240149),TRINITY_DN2618_c2_g3(1.16746035949),TRINITY_DN2624_c3_g2(-1.7395971044),TRINITY_DN2656_c0_g2(-4.58846026162),TRINITY_DN2881_c4_g1(-2.13230653776),TRINITY_DN311_c0_g1(-3.06936398231),TRINITY_DN3135_c2_g3(1.84163748525),TRINITY_DN3238_c1_g1(4.68706194956),TRINITY_DN3282_c0_g4(1.20593803666)…
GO:0044093	positive regulation of molecular function	biological process	17/234	37/681	0.09053	1	TRINITY_DN1268_c0_g1(-2.06811775799),TRINITY_DN1357_c0_g1(-2.55339730538),TRINITY_DN1551_c0_g1(-2.62773240149),TRINITY_DN2618_c2_g3(1.16746035949),TRINITY_DN2677_c1_g2(1.75084897723),TRINITY_DN2990_c3_g1(4.48637222765),TRINITY_DN2991_c1_g2(-1.38723740444),TRINITY_DN3130_c0_g1(-1.11371794823),TRINITY_DN3135_c2_g3(1.84163748525),TRINITY_DN3238_c1_g1(4.68706194956),TRINITY_DN3311_c1_g2(-1.1328174022…	TRINITY_DN1268_c0_g1(-2.06811775799),TRINITY_DN1357_c0_g1(-2.55339730538),TRINITY_DN1551_c0_g1(-2.62773240149),TRINITY_DN2618_c2_g3(1.16746035949),TRINITY_DN2677_c1_g2(1.75084897723),TRINITY_DN2990_c3_g1(4.48637222765),TRINITY_DN2991_c1_g2(-1.38723740444),TRINITY_DN3130_c0_g1(-1.11371794823),TRINITY_DN3135_c2_g3(1.84163748525),TRINITY_DN3238_c1_g1(4.68706194956),TRINITY_DN3311_c1_g2(-1.1328174022…
GO:0040008	regulation of growth	biological process	11/234	22/681	0.09187	1	TRINITY_DN2512_c2_g5(-3.78741905927),TRINITY_DN2618_c2_g3(1.16746035949),TRINITY_DN2948_c3_g2(-1.25152991183),TRINITY_DN2990_c3_g1(4.48637222765),TRINITY_DN3311_c1_g2(-1.13281740221),TRINITY_DN3324_c1_g1(-1.19910771168),TRINITY_DN3344_c2_g2(-1.07984282302),TRINITY_DN3416_c0_g3(-1.06697066005),TRINITY_DN3512_c0_g2(-1.87901474245),TRINITY_DN3656_c1_g1(-2.08721167236),TRINITY_DN3656_c1_g5(-3.0268411…	TRINITY_DN2512_c2_g5(-3.78741905927),TRINITY_DN2618_c2_g3(1.16746035949),TRINITY_DN2948_c3_g2(-1.25152991183),TRINITY_DN2990_c3_g1(4.48637222765),TRINITY_DN3311_c1_g2(-1.13281740221),TRINITY_DN3324_c1_g1(-1.19910771168),TRINITY_DN3344_c2_g2(-1.07984282302),TRINITY_DN3416_c0_g3(-1.06697066005),TRINITY_DN3512_c0_g2(-1.87901474245),TRINITY_DN3656_c1_g1(-2.08721167236),TRINITY_DN3656_c1_g5(-3.0268411…
GO:0007017	microtubule-based process	biological process	15/234	32/681	0.09249	1	TRINITY_DN109_c0_g1(-2.43108989434),TRINITY_DN1245_c0_g2(-3.43593361414),TRINITY_DN1483_c0_g1(-2.10294444973),TRINITY_DN1551_c0_g1(-2.62773240149),TRINITY_DN2543_c6_g1(-2.18833933765),TRINITY_DN2594_c2_g3(-1.36851091336),TRINITY_DN2639_c3_g4(-1.71335820389),TRINITY_DN2656_c0_g2(-4.58846026162),TRINITY_DN2881_c4_g1(-2.13230653776),TRINITY_DN311_c0_g1(-3.06936398231),TRINITY_DN3282_c0_g4(1.20593803…	TRINITY_DN109_c0_g1(-2.43108989434),TRINITY_DN1245_c0_g2(-3.43593361414),TRINITY_DN1483_c0_g1(-2.10294444973),TRINITY_DN1551_c0_g1(-2.62773240149),TRINITY_DN2543_c6_g1(-2.18833933765),TRINITY_DN2594_c2_g3(-1.36851091336),TRINITY_DN2639_c3_g4(-1.71335820389),TRINITY_DN2656_c0_g2(-4.58846026162),TRINITY_DN2881_c4_g1(-2.13230653776),TRINITY_DN311_c0_g1(-3.06936398231),TRINITY_DN3282_c0_g4(1.20593803…
GO:0007166	cell surface receptor signaling pathway	biological process	15/234	32/681	0.09249	1	TRINITY_DN1357_c0_g1(-2.55339730538),TRINITY_DN1551_c0_g1(-2.62773240149),TRINITY_DN1896_c0_g1(-1.43122376696),TRINITY_DN2244_c0_g1(-2.14833104305),TRINITY_DN2670_c0_g1(-1.16807489944),TRINITY_DN2677_c1_g2(1.75084897723),TRINITY_DN2863_c0_g2(-1.17670982061),TRINITY_DN2948_c3_g2(-1.25152991183),TRINITY_DN2990_c3_g1(4.48637222765),TRINITY_DN2991_c1_g2(-1.38723740444),TRINITY_DN3130_c0_g1(-1.1137179…	TRINITY_DN1357_c0_g1(-2.55339730538),TRINITY_DN1551_c0_g1(-2.62773240149),TRINITY_DN1896_c0_g1(-1.43122376696),TRINITY_DN2244_c0_g1(-2.14833104305),TRINITY_DN2670_c0_g1(-1.16807489944),TRINITY_DN2677_c1_g2(1.75084897723),TRINITY_DN2863_c0_g2(-1.17670982061),TRINITY_DN2948_c3_g2(-1.25152991183),TRINITY_DN2990_c3_g1(4.48637222765),TRINITY_DN2991_c1_g2(-1.38723740444),TRINITY_DN3130_c0_g1(-1.1137179…
GO:0006955	immune response	biological process	13/234	27/681	0.09321	1	TRINITY_DN1453_c0_g1(-2.82693098456),TRINITY_DN2506_c1_g2(2.69390264406),TRINITY_DN2638_c4_g1(-1.94308971346),TRINITY_DN2638_c4_g3(-1.69613457802),TRINITY_DN2670_c2_g4(-1.43011048969),TRINITY_DN2727_c2_g2(2.80700894859),TRINITY_DN2863_c0_g2(-1.17670982061),TRINITY_DN2990_c3_g1(4.48637222765),TRINITY_DN3160_c3_g6(1.13017127252),TRINITY_DN3243_c2_g4(1.8219994837),TRINITY_DN3667_c3_g3(-1.03216184042…	TRINITY_DN1453_c0_g1(-2.82693098456),TRINITY_DN2506_c1_g2(2.69390264406),TRINITY_DN2638_c4_g1(-1.94308971346),TRINITY_DN2638_c4_g3(-1.69613457802),TRINITY_DN2670_c2_g4(-1.43011048969),TRINITY_DN2727_c2_g2(2.80700894859),TRINITY_DN2863_c0_g2(-1.17670982061),TRINITY_DN2990_c3_g1(4.48637222765),TRINITY_DN3160_c3_g6(1.13017127252),TRINITY_DN3243_c2_g4(1.8219994837),TRINITY_DN3667_c3_g3(-1.03216184042…
GO:0051704	multi-organism process	biological process	41/234	101/681	0.09502	1	TRINITY_DN1383_c0_g2(-5.09453204951),TRINITY_DN1453_c0_g1(-2.82693098456),TRINITY_DN1577_c0_g1(-1.27109622825),TRINITY_DN2244_c0_g1(-2.14833104305),TRINITY_DN2506_c1_g2(2.69390264406),TRINITY_DN2521_c4_g1(-2.61442070653),TRINITY_DN2522_c0_g1(1.71353669634),TRINITY_DN2576_c0_g2(-1.04508082347),TRINITY_DN2610_c4_g1(-1.54090835941),TRINITY_DN2618_c2_g3(1.16746035949),TRINITY_DN2638_c4_g1(-1.94308971…	TRINITY_DN1383_c0_g2(-5.09453204951),TRINITY_DN1453_c0_g1(-2.82693098456),TRINITY_DN1577_c0_g1(-1.27109622825),TRINITY_DN2244_c0_g1(-2.14833104305),TRINITY_DN2506_c1_g2(2.69390264406),TRINITY_DN2521_c4_g1(-2.61442070653),TRINITY_DN2522_c0_g1(1.71353669634),TRINITY_DN2576_c0_g2(-1.04508082347),TRINITY_DN2610_c4_g1(-1.54090835941),TRINITY_DN2618_c2_g3(1.16746035949),TRINITY_DN2638_c4_g1(-1.94308971…
GO:0000077	DNA damage checkpoint	biological process	5/234	8/681	0.09758	1	TRINITY_DN1577_c0_g1(-1.27109622825),TRINITY_DN3135_c2_g3(1.84163748525),TRINITY_DN3238_c1_g1(4.68706194956),TRINITY_DN3285_c2_g1(-1.58640393684),TRINITY_DN3355_c2_g2(-1.83919966724)	TRINITY_DN1577_c0_g1(-1.27109622825),TRINITY_DN3135_c2_g3(1.84163748525),TRINITY_DN3238_c1_g1(4.68706194956),TRINITY_DN3285_c2_g1(-1.58640393684),TRINITY_DN3355_c2_g2(-1.83919966724)
GO:0010256	endomembrane system organization	biological process	5/234	8/681	0.09758	1	TRINITY_DN2244_c0_g1(-2.14833104305),TRINITY_DN2670_c0_g1(-1.16807489944),TRINITY_DN3118_c6_g1(-2.15189148233),TRINITY_DN3252_c2_g1(-1.37996033515),TRINITY_DN3462_c3_g3(-1.43033070868)	TRINITY_DN2244_c0_g1(-2.14833104305),TRINITY_DN2670_c0_g1(-1.16807489944),TRINITY_DN3118_c6_g1(-2.15189148233),TRINITY_DN3252_c2_g1(-1.37996033515),TRINITY_DN3462_c3_g3(-1.43033070868)
GO:0015850	organic hydroxy compound transport	biological process	5/234	8/681	0.09758	1	TRINITY_DN2618_c2_g3(1.16746035949),TRINITY_DN3512_c0_g2(-1.87901474245),TRINITY_DN3600_c1_g3(3.14748655044),TRINITY_DN3656_c1_g1(-2.08721167236),TRINITY_DN3656_c1_g5(-3.02684114829)	TRINITY_DN2618_c2_g3(1.16746035949),TRINITY_DN3512_c0_g2(-1.87901474245),TRINITY_DN3600_c1_g3(3.14748655044),TRINITY_DN3656_c1_g1(-2.08721167236),TRINITY_DN3656_c1_g5(-3.02684114829)
GO:0031570	DNA integrity checkpoint	biological process	5/234	8/681	0.09758	1	TRINITY_DN1577_c0_g1(-1.27109622825),TRINITY_DN3135_c2_g3(1.84163748525),TRINITY_DN3238_c1_g1(4.68706194956),TRINITY_DN3285_c2_g1(-1.58640393684),TRINITY_DN3355_c2_g2(-1.83919966724)	TRINITY_DN1577_c0_g1(-1.27109622825),TRINITY_DN3135_c2_g3(1.84163748525),TRINITY_DN3238_c1_g1(4.68706194956),TRINITY_DN3285_c2_g1(-1.58640393684),TRINITY_DN3355_c2_g2(-1.83919966724)
GO:0043009	chordate embryonic development	biological process	5/234	8/681	0.09758	1	TRINITY_DN1551_c0_g1(-2.62773240149),TRINITY_DN2244_c0_g1(-2.14833104305),TRINITY_DN2670_c0_g1(-1.16807489944),TRINITY_DN2990_c3_g1(4.48637222765),TRINITY_DN3602_c4_g2(-2.95532582631)	TRINITY_DN1551_c0_g1(-2.62773240149),TRINITY_DN2244_c0_g1(-2.14833104305),TRINITY_DN2670_c0_g1(-1.16807489944),TRINITY_DN2990_c3_g1(4.48637222765),TRINITY_DN3602_c4_g2(-2.95532582631)
GO:0098661	inorganic anion transmembrane transport	biological process	5/234	8/681	0.09758	1	TRINITY_DN2823_c2_g4(-1.13639408501),TRINITY_DN3217_c0_g1(-4.26414724998),TRINITY_DN3217_c0_g2(-14.4886184371),TRINITY_DN3572_c0_g1(2.50846379256),TRINITY_DN3572_c0_g4(-1.01046578553)	TRINITY_DN2823_c2_g4(-1.13639408501),TRINITY_DN3217_c0_g1(-4.26414724998),TRINITY_DN3217_c0_g2(-14.4886184371),TRINITY_DN3572_c0_g1(2.50846379256),TRINITY_DN3572_c0_g4(-1.01046578553)
GO:1902410	mitotic cytokinetic process	biological process	5/234	8/681	0.09758	1	TRINITY_DN2594_c2_g3(-1.36851091336),TRINITY_DN2639_c3_g4(-1.71335820389),TRINITY_DN2786_c2_g4(-1.88079518437),TRINITY_DN3034_c3_g2(-2.78869539746),TRINITY_DN3580_c0_g1(-1.66708596092)	TRINITY_DN2594_c2_g3(-1.36851091336),TRINITY_DN2639_c3_g4(-1.71335820389),TRINITY_DN2786_c2_g4(-1.88079518437),TRINITY_DN3034_c3_g2(-2.78869539746),TRINITY_DN3580_c0_g1(-1.66708596092)
GO:0042327	positive regulation of phosphorylation	biological process	8/234	15/681	0.10068	1	TRINITY_DN1551_c0_g1(-2.62773240149),TRINITY_DN2618_c2_g3(1.16746035949),TRINITY_DN3135_c2_g3(1.84163748525),TRINITY_DN3238_c1_g1(4.68706194956),TRINITY_DN3355_c2_g2(-1.83919966724),TRINITY_DN3512_c0_g2(-1.87901474245),TRINITY_DN3656_c1_g1(-2.08721167236),TRINITY_DN3656_c1_g5(-3.02684114829)	TRINITY_DN1551_c0_g1(-2.62773240149),TRINITY_DN2618_c2_g3(1.16746035949),TRINITY_DN3135_c2_g3(1.84163748525),TRINITY_DN3238_c1_g1(4.68706194956),TRINITY_DN3355_c2_g2(-1.83919966724),TRINITY_DN3512_c0_g2(-1.87901474245),TRINITY_DN3656_c1_g1(-2.08721167236),TRINITY_DN3656_c1_g5(-3.02684114829)
GO:0060271	cilium assembly	biological process	8/234	15/681	0.10068	1	TRINITY_DN109_c0_g1(-2.43108989434),TRINITY_DN1245_c0_g2(-3.43593361414),TRINITY_DN1551_c0_g1(-2.62773240149),TRINITY_DN2656_c0_g2(-4.58846026162),TRINITY_DN311_c0_g1(-3.06936398231),TRINITY_DN3282_c0_g4(1.20593803666),TRINITY_DN3526_c2_g3(-3.28668474605),TRINITY_DN99_c0_g1(-1.6657118923)	TRINITY_DN109_c0_g1(-2.43108989434),TRINITY_DN1245_c0_g2(-3.43593361414),TRINITY_DN1551_c0_g1(-2.62773240149),TRINITY_DN2656_c0_g2(-4.58846026162),TRINITY_DN311_c0_g1(-3.06936398231),TRINITY_DN3282_c0_g4(1.20593803666),TRINITY_DN3526_c2_g3(-3.28668474605),TRINITY_DN99_c0_g1(-1.6657118923)
GO:1901987	regulation of cell cycle phase transition	biological process	8/234	15/681	0.10068	1	TRINITY_DN1577_c0_g1(-1.27109622825),TRINITY_DN2618_c2_g3(1.16746035949),TRINITY_DN2830_c1_g6(-2.81950059698),TRINITY_DN3285_c2_g1(-1.58640393684),TRINITY_DN3512_c0_g2(-1.87901474245),TRINITY_DN3656_c1_g1(-2.08721167236),TRINITY_DN3656_c1_g5(-3.02684114829),TRINITY_DN3688_c1_g7(-2.38640377363)	TRINITY_DN1577_c0_g1(-1.27109622825),TRINITY_DN2618_c2_g3(1.16746035949),TRINITY_DN2830_c1_g6(-2.81950059698),TRINITY_DN3285_c2_g1(-1.58640393684),TRINITY_DN3512_c0_g2(-1.87901474245),TRINITY_DN3656_c1_g1(-2.08721167236),TRINITY_DN3656_c1_g5(-3.02684114829),TRINITY_DN3688_c1_g7(-2.38640377363)
GO:0051726	regulation of cell cycle	biological process	14/234	30/681	0.10621	1	TRINITY_DN1551_c0_g1(-2.62773240149),TRINITY_DN1577_c0_g1(-1.27109622825),TRINITY_DN2618_c2_g3(1.16746035949),TRINITY_DN2830_c1_g6(-2.81950059698),TRINITY_DN2990_c3_g1(4.48637222765),TRINITY_DN3034_c3_g2(-2.78869539746),TRINITY_DN3135_c2_g3(1.84163748525),TRINITY_DN3238_c1_g1(4.68706194956),TRINITY_DN3285_c2_g1(-1.58640393684),TRINITY_DN3355_c2_g2(-1.83919966724),TRINITY_DN3512_c0_g2(-1.879014742…	TRINITY_DN1551_c0_g1(-2.62773240149),TRINITY_DN1577_c0_g1(-1.27109622825),TRINITY_DN2618_c2_g3(1.16746035949),TRINITY_DN2830_c1_g6(-2.81950059698),TRINITY_DN2990_c3_g1(4.48637222765),TRINITY_DN3034_c3_g2(-2.78869539746),TRINITY_DN3135_c2_g3(1.84163748525),TRINITY_DN3238_c1_g1(4.68706194956),TRINITY_DN3285_c2_g1(-1.58640393684),TRINITY_DN3355_c2_g2(-1.83919966724),TRINITY_DN3512_c0_g2(-1.879014742…
GO:0007167	enzyme linked receptor protein signaling pathway	biological process	10/234	20/681	0.1063	1	TRINITY_DN1357_c0_g1(-2.55339730538),TRINITY_DN1896_c0_g1(-1.43122376696),TRINITY_DN2677_c1_g2(1.75084897723),TRINITY_DN2948_c3_g2(-1.25152991183),TRINITY_DN2990_c3_g1(4.48637222765),TRINITY_DN2991_c1_g2(-1.38723740444),TRINITY_DN3130_c0_g1(-1.11371794823),TRINITY_DN3344_c2_g2(-1.07984282302),TRINITY_DN3416_c0_g3(-1.06697066005),TRINITY_DN3757_c3_g4(2.45866702157)	TRINITY_DN1357_c0_g1(-2.55339730538),TRINITY_DN1896_c0_g1(-1.43122376696),TRINITY_DN2677_c1_g2(1.75084897723),TRINITY_DN2948_c3_g2(-1.25152991183),TRINITY_DN2990_c3_g1(4.48637222765),TRINITY_DN2991_c1_g2(-1.38723740444),TRINITY_DN3130_c0_g1(-1.11371794823),TRINITY_DN3344_c2_g2(-1.07984282302),TRINITY_DN3416_c0_g3(-1.06697066005),TRINITY_DN3757_c3_g4(2.45866702157)
GO:0051338	regulation of transferase activity	biological process	10/234	20/681	0.1063	1	TRINITY_DN1268_c0_g1(-2.06811775799),TRINITY_DN1551_c0_g1(-2.62773240149),TRINITY_DN2618_c2_g3(1.16746035949),TRINITY_DN3135_c2_g3(1.84163748525),TRINITY_DN3238_c1_g1(4.68706194956),TRINITY_DN3355_c2_g2(-1.83919966724),TRINITY_DN3512_c0_g2(-1.87901474245),TRINITY_DN3593_c3_g1(-1.127844984),TRINITY_DN3656_c1_g1(-2.08721167236),TRINITY_DN3656_c1_g5(-3.02684114829)	TRINITY_DN1268_c0_g1(-2.06811775799),TRINITY_DN1551_c0_g1(-2.62773240149),TRINITY_DN2618_c2_g3(1.16746035949),TRINITY_DN3135_c2_g3(1.84163748525),TRINITY_DN3238_c1_g1(4.68706194956),TRINITY_DN3355_c2_g2(-1.83919966724),TRINITY_DN3512_c0_g2(-1.87901474245),TRINITY_DN3593_c3_g1(-1.127844984),TRINITY_DN3656_c1_g1(-2.08721167236),TRINITY_DN3656_c1_g5(-3.02684114829)
GO:0048585	negative regulation of response to stimulus	biological process	12/234	25/681	0.10746	1	TRINITY_DN1896_c0_g1(-1.43122376696),TRINITY_DN2244_c0_g1(-2.14833104305),TRINITY_DN2512_c2_g5(-3.78741905927),TRINITY_DN2670_c0_g1(-1.16807489944),TRINITY_DN2670_c2_g4(-1.43011048969),TRINITY_DN2863_c0_g2(-1.17670982061),TRINITY_DN2948_c3_g2(-1.25152991183),TRINITY_DN3324_c1_g1(-1.19910771168),TRINITY_DN3344_c2_g2(-1.07984282302),TRINITY_DN3405_c2_g4(1.31430881022),TRINITY_DN3416_c0_g3(-1.066970…	TRINITY_DN1896_c0_g1(-1.43122376696),TRINITY_DN2244_c0_g1(-2.14833104305),TRINITY_DN2512_c2_g5(-3.78741905927),TRINITY_DN2670_c0_g1(-1.16807489944),TRINITY_DN2670_c2_g4(-1.43011048969),TRINITY_DN2863_c0_g2(-1.17670982061),TRINITY_DN2948_c3_g2(-1.25152991183),TRINITY_DN3324_c1_g1(-1.19910771168),TRINITY_DN3344_c2_g2(-1.07984282302),TRINITY_DN3405_c2_g4(1.31430881022),TRINITY_DN3416_c0_g3(-1.066970…
GO:0012501	programmed cell death	biological process	19/234	43/681	0.10945	1	TRINITY_DN1267_c0_g1(-3.74317437745),TRINITY_DN1551_c0_g1(-2.62773240149),TRINITY_DN2512_c2_g5(-3.78741905927),TRINITY_DN2618_c2_g3(1.16746035949),TRINITY_DN2948_c3_g2(-1.25152991183),TRINITY_DN2990_c3_g1(4.48637222765),TRINITY_DN3135_c2_g3(1.84163748525),TRINITY_DN3238_c1_g1(4.68706194956),TRINITY_DN3285_c2_g1(-1.58640393684),TRINITY_DN3311_c1_g2(-1.13281740221),TRINITY_DN3344_c2_g2(-1.079842823…	TRINITY_DN1267_c0_g1(-3.74317437745),TRINITY_DN1551_c0_g1(-2.62773240149),TRINITY_DN2512_c2_g5(-3.78741905927),TRINITY_DN2618_c2_g3(1.16746035949),TRINITY_DN2948_c3_g2(-1.25152991183),TRINITY_DN2990_c3_g1(4.48637222765),TRINITY_DN3135_c2_g3(1.84163748525),TRINITY_DN3238_c1_g1(4.68706194956),TRINITY_DN3285_c2_g1(-1.58640393684),TRINITY_DN3311_c1_g2(-1.13281740221),TRINITY_DN3344_c2_g2(-1.079842823…
GO:0002831	regulation of response to biotic stimulus	biological process	4/234	6/681	0.10961	1	TRINITY_DN2618_c2_g3(1.16746035949),TRINITY_DN3512_c0_g2(-1.87901474245),TRINITY_DN3656_c1_g1(-2.08721167236),TRINITY_DN3656_c1_g5(-3.02684114829)	TRINITY_DN2618_c2_g3(1.16746035949),TRINITY_DN3512_c0_g2(-1.87901474245),TRINITY_DN3656_c1_g1(-2.08721167236),TRINITY_DN3656_c1_g5(-3.02684114829)
GO:0006182	cGMP biosynthetic process	biological process	4/234	6/681	0.10961	1	TRINITY_DN2638_c4_g1(-1.94308971346),TRINITY_DN2638_c4_g3(-1.69613457802),TRINITY_DN3243_c2_g4(1.8219994837),TRINITY_DN886_c0_g1(3.44157379396)	TRINITY_DN2638_c4_g1(-1.94308971346),TRINITY_DN2638_c4_g3(-1.69613457802),TRINITY_DN3243_c2_g4(1.8219994837),TRINITY_DN886_c0_g1(3.44157379396)
GO:0007041	lysosomal transport	biological process	4/234	6/681	0.10961	1	TRINITY_DN2948_c3_g2(-1.25152991183),TRINITY_DN3118_c6_g1(-2.15189148233),TRINITY_DN3344_c2_g2(-1.07984282302),TRINITY_DN3416_c0_g3(-1.06697066005)	TRINITY_DN2948_c3_g2(-1.25152991183),TRINITY_DN3118_c6_g1(-2.15189148233),TRINITY_DN3344_c2_g2(-1.07984282302),TRINITY_DN3416_c0_g3(-1.06697066005)
GO:0007266	Rho protein signal transduction	biological process	4/234	6/681	0.10961	1	TRINITY_DN2618_c2_g3(1.16746035949),TRINITY_DN3512_c0_g2(-1.87901474245),TRINITY_DN3656_c1_g1(-2.08721167236),TRINITY_DN3656_c1_g5(-3.02684114829)	TRINITY_DN2618_c2_g3(1.16746035949),TRINITY_DN3512_c0_g2(-1.87901474245),TRINITY_DN3656_c1_g1(-2.08721167236),TRINITY_DN3656_c1_g5(-3.02684114829)
GO:0009190	cyclic nucleotide biosynthetic process	biological process	4/234	6/681	0.10961	1	TRINITY_DN2638_c4_g1(-1.94308971346),TRINITY_DN2638_c4_g3(-1.69613457802),TRINITY_DN3243_c2_g4(1.8219994837),TRINITY_DN886_c0_g1(3.44157379396)	TRINITY_DN2638_c4_g1(-1.94308971346),TRINITY_DN2638_c4_g3(-1.69613457802),TRINITY_DN3243_c2_g4(1.8219994837),TRINITY_DN886_c0_g1(3.44157379396)
GO:0030326	embryonic limb morphogenesis	biological process	4/234	6/681	0.10961	1	TRINITY_DN2990_c3_g1(4.48637222765),TRINITY_DN3135_c2_g3(1.84163748525),TRINITY_DN3238_c1_g1(4.68706194956),TRINITY_DN3355_c2_g2(-1.83919966724)	TRINITY_DN2990_c3_g1(4.48637222765),TRINITY_DN3135_c2_g3(1.84163748525),TRINITY_DN3238_c1_g1(4.68706194956),TRINITY_DN3355_c2_g2(-1.83919966724)
GO:0032104	regulation of response to extracellular stimulus	biological process	4/234	6/681	0.10961	1	TRINITY_DN2618_c2_g3(1.16746035949),TRINITY_DN3512_c0_g2(-1.87901474245),TRINITY_DN3656_c1_g1(-2.08721167236),TRINITY_DN3656_c1_g5(-3.02684114829)	TRINITY_DN2618_c2_g3(1.16746035949),TRINITY_DN3512_c0_g2(-1.87901474245),TRINITY_DN3656_c1_g1(-2.08721167236),TRINITY_DN3656_c1_g5(-3.02684114829)
GO:0032107	regulation of response to nutrient levels	biological process	4/234	6/681	0.10961	1	TRINITY_DN2618_c2_g3(1.16746035949),TRINITY_DN3512_c0_g2(-1.87901474245),TRINITY_DN3656_c1_g1(-2.08721167236),TRINITY_DN3656_c1_g5(-3.02684114829)	TRINITY_DN2618_c2_g3(1.16746035949),TRINITY_DN3512_c0_g2(-1.87901474245),TRINITY_DN3656_c1_g1(-2.08721167236),TRINITY_DN3656_c1_g5(-3.02684114829)
GO:0032388	positive regulation of intracellular transport	biological process	4/234	6/681	0.10961	1	TRINITY_DN2618_c2_g3(1.16746035949),TRINITY_DN3512_c0_g2(-1.87901474245),TRINITY_DN3656_c1_g1(-2.08721167236),TRINITY_DN3656_c1_g5(-3.02684114829)	TRINITY_DN2618_c2_g3(1.16746035949),TRINITY_DN3512_c0_g2(-1.87901474245),TRINITY_DN3656_c1_g1(-2.08721167236),TRINITY_DN3656_c1_g5(-3.02684114829)
GO:0035108	limb morphogenesis	biological process	4/234	6/681	0.10961	1	TRINITY_DN2990_c3_g1(4.48637222765),TRINITY_DN3135_c2_g3(1.84163748525),TRINITY_DN3238_c1_g1(4.68706194956),TRINITY_DN3355_c2_g2(-1.83919966724)	TRINITY_DN2990_c3_g1(4.48637222765),TRINITY_DN3135_c2_g3(1.84163748525),TRINITY_DN3238_c1_g1(4.68706194956),TRINITY_DN3355_c2_g2(-1.83919966724)
GO:0035113	embryonic appendage morphogenesis	biological process	4/234	6/681	0.10961	1	TRINITY_DN2990_c3_g1(4.48637222765),TRINITY_DN3135_c2_g3(1.84163748525),TRINITY_DN3238_c1_g1(4.68706194956),TRINITY_DN3355_c2_g2(-1.83919966724)	TRINITY_DN2990_c3_g1(4.48637222765),TRINITY_DN3135_c2_g3(1.84163748525),TRINITY_DN3238_c1_g1(4.68706194956),TRINITY_DN3355_c2_g2(-1.83919966724)
GO:0035282	segmentation	biological process	4/234	6/681	0.10961	1	TRINITY_DN2244_c0_g1(-2.14833104305),TRINITY_DN2670_c0_g1(-1.16807489944),TRINITY_DN2990_c3_g1(4.48637222765),TRINITY_DN3071_c0_g4(-1.25105018748)	TRINITY_DN2244_c0_g1(-2.14833104305),TRINITY_DN2670_c0_g1(-1.16807489944),TRINITY_DN2990_c3_g1(4.48637222765),TRINITY_DN3071_c0_g4(-1.25105018748)
GO:0042063	gliogenesis	biological process	4/234	6/681	0.10961	1	TRINITY_DN2948_c3_g2(-1.25152991183),TRINITY_DN2990_c3_g1(4.48637222765),TRINITY_DN3344_c2_g2(-1.07984282302),TRINITY_DN3416_c0_g3(-1.06697066005)	TRINITY_DN2948_c3_g2(-1.25152991183),TRINITY_DN2990_c3_g1(4.48637222765),TRINITY_DN3344_c2_g2(-1.07984282302),TRINITY_DN3416_c0_g3(-1.06697066005)
GO:0042733	embryonic digit morphogenesis	biological process	4/234	6/681	0.10961	1	TRINITY_DN2990_c3_g1(4.48637222765),TRINITY_DN3135_c2_g3(1.84163748525),TRINITY_DN3238_c1_g1(4.68706194956),TRINITY_DN3355_c2_g2(-1.83919966724)	TRINITY_DN2990_c3_g1(4.48637222765),TRINITY_DN3135_c2_g3(1.84163748525),TRINITY_DN3238_c1_g1(4.68706194956),TRINITY_DN3355_c2_g2(-1.83919966724)
GO:0044786	cell cycle DNA replication	biological process	4/234	6/681	0.10961	1	TRINITY_DN1577_c0_g1(-1.27109622825),TRINITY_DN3034_c3_g2(-2.78869539746),TRINITY_DN3172_c3_g4(-1.50849298535),TRINITY_DN3343_c1_g7(1.11505558557)	TRINITY_DN1577_c0_g1(-1.27109622825),TRINITY_DN3034_c3_g2(-2.78869539746),TRINITY_DN3172_c3_g4(-1.50849298535),TRINITY_DN3343_c1_g7(1.11505558557)
GO:0046068	cGMP metabolic process	biological process	4/234	6/681	0.10961	1	TRINITY_DN2638_c4_g1(-1.94308971346),TRINITY_DN2638_c4_g3(-1.69613457802),TRINITY_DN3243_c2_g4(1.8219994837),TRINITY_DN886_c0_g1(3.44157379396)	TRINITY_DN2638_c4_g1(-1.94308971346),TRINITY_DN2638_c4_g3(-1.69613457802),TRINITY_DN3243_c2_g4(1.8219994837),TRINITY_DN886_c0_g1(3.44157379396)
GO:0052652	cyclic purine nucleotide metabolic process	biological process	4/234	6/681	0.10961	1	TRINITY_DN2638_c4_g1(-1.94308971346),TRINITY_DN2638_c4_g3(-1.69613457802),TRINITY_DN3243_c2_g4(1.8219994837),TRINITY_DN886_c0_g1(3.44157379396)	TRINITY_DN2638_c4_g1(-1.94308971346),TRINITY_DN2638_c4_g3(-1.69613457802),TRINITY_DN3243_c2_g4(1.8219994837),TRINITY_DN886_c0_g1(3.44157379396)
GO:0071479	cellular response to ionizing radiation	biological process	4/234	6/681	0.10961	1	TRINITY_DN3135_c2_g3(1.84163748525),TRINITY_DN3238_c1_g1(4.68706194956),TRINITY_DN3311_c1_g2(-1.13281740221),TRINITY_DN3355_c2_g2(-1.83919966724)	TRINITY_DN3135_c2_g3(1.84163748525),TRINITY_DN3238_c1_g1(4.68706194956),TRINITY_DN3311_c1_g2(-1.13281740221),TRINITY_DN3355_c2_g2(-1.83919966724)
GO:0071480	cellular response to gamma radiation	biological process	4/234	6/681	0.10961	1	TRINITY_DN3135_c2_g3(1.84163748525),TRINITY_DN3238_c1_g1(4.68706194956),TRINITY_DN3311_c1_g2(-1.13281740221),TRINITY_DN3355_c2_g2(-1.83919966724)	TRINITY_DN3135_c2_g3(1.84163748525),TRINITY_DN3238_c1_g1(4.68706194956),TRINITY_DN3311_c1_g2(-1.13281740221),TRINITY_DN3355_c2_g2(-1.83919966724)
GO:0090092	regulation of transmembrane receptor protein serine/threonine kinase signaling pathway	biological process	4/234	6/681	0.10961	1	TRINITY_DN1896_c0_g1(-1.43122376696),TRINITY_DN2948_c3_g2(-1.25152991183),TRINITY_DN3344_c2_g2(-1.07984282302),TRINITY_DN3416_c0_g3(-1.06697066005)	TRINITY_DN1896_c0_g1(-1.43122376696),TRINITY_DN2948_c3_g2(-1.25152991183),TRINITY_DN3344_c2_g2(-1.07984282302),TRINITY_DN3416_c0_g3(-1.06697066005)
GO:0090101	negative regulation of transmembrane receptor protein serine/threonine kinase signaling pathway	biological process	4/234	6/681	0.10961	1	TRINITY_DN1896_c0_g1(-1.43122376696),TRINITY_DN2948_c3_g2(-1.25152991183),TRINITY_DN3344_c2_g2(-1.07984282302),TRINITY_DN3416_c0_g3(-1.06697066005)	TRINITY_DN1896_c0_g1(-1.43122376696),TRINITY_DN2948_c3_g2(-1.25152991183),TRINITY_DN3344_c2_g2(-1.07984282302),TRINITY_DN3416_c0_g3(-1.06697066005)
GO:0090316	positive regulation of intracellular protein transport	biological process	4/234	6/681	0.10961	1	TRINITY_DN2618_c2_g3(1.16746035949),TRINITY_DN3512_c0_g2(-1.87901474245),TRINITY_DN3656_c1_g1(-2.08721167236),TRINITY_DN3656_c1_g5(-3.02684114829)	TRINITY_DN2618_c2_g3(1.16746035949),TRINITY_DN3512_c0_g2(-1.87901474245),TRINITY_DN3656_c1_g1(-2.08721167236),TRINITY_DN3656_c1_g5(-3.02684114829)
GO:0006811	ion transport	biological process	31/234	75/681	0.11225	1	TRINITY_DN1269_c0_g1(-2.69702190868),TRINITY_DN1357_c0_g1(-2.55339730538),TRINITY_DN1373_c0_g1(-2.06665804542),TRINITY_DN1903_c0_g1(-1.0299931519),TRINITY_DN2198_c0_g1(1.02592882666),TRINITY_DN2539_c0_g1(-1.81563107104),TRINITY_DN2642_c2_g4(2.69107002639),TRINITY_DN2677_c1_g2(1.75084897723),TRINITY_DN2823_c2_g4(-1.13639408501),TRINITY_DN2848_c1_g1(1.48364203419),TRINITY_DN2981_c1_g1(-1.2865393413…	TRINITY_DN1269_c0_g1(-2.69702190868),TRINITY_DN1357_c0_g1(-2.55339730538),TRINITY_DN1373_c0_g1(-2.06665804542),TRINITY_DN1903_c0_g1(-1.0299931519),TRINITY_DN2198_c0_g1(1.02592882666),TRINITY_DN2539_c0_g1(-1.81563107104),TRINITY_DN2642_c2_g4(2.69107002639),TRINITY_DN2677_c1_g2(1.75084897723),TRINITY_DN2823_c2_g4(-1.13639408501),TRINITY_DN2848_c1_g1(1.48364203419),TRINITY_DN2981_c1_g1(-1.2865393413…
GO:1901575	organic substance catabolic process	biological process	42/234	105/681	0.11353	1	TRINITY_DN1086_c0_g1(2.04510527931),TRINITY_DN1427_c0_g1(-2.09599714025),TRINITY_DN1445_c0_g1(-3.12136795106),TRINITY_DN1568_c0_g1(-1.33754060427),TRINITY_DN2301_c0_g1(2.37287805567),TRINITY_DN2481_c5_g1(-1.72793019786),TRINITY_DN2610_c4_g1(-1.54090835941),TRINITY_DN2670_c2_g6(-1.02619526061),TRINITY_DN2713_c2_g2(-1.10006926738),TRINITY_DN2713_c2_g4(-1.53848907314),TRINITY_DN2783_c0_g1(-2.2794169…	TRINITY_DN1086_c0_g1(2.04510527931),TRINITY_DN1427_c0_g1(-2.09599714025),TRINITY_DN1445_c0_g1(-3.12136795106),TRINITY_DN1568_c0_g1(-1.33754060427),TRINITY_DN2301_c0_g1(2.37287805567),TRINITY_DN2481_c5_g1(-1.72793019786),TRINITY_DN2610_c4_g1(-1.54090835941),TRINITY_DN2670_c2_g6(-1.02619526061),TRINITY_DN2713_c2_g2(-1.10006926738),TRINITY_DN2713_c2_g4(-1.53848907314),TRINITY_DN2783_c0_g1(-2.2794169…
GO:0007292	female gamete generation	biological process	7/234	13/681	0.1169	1	TRINITY_DN1577_c0_g1(-1.27109622825),TRINITY_DN2576_c0_g2(-1.04508082347),TRINITY_DN2948_c3_g2(-1.25152991183),TRINITY_DN2986_c3_g1(-1.95868262638),TRINITY_DN2990_c3_g1(4.48637222765),TRINITY_DN3344_c2_g2(-1.07984282302),TRINITY_DN3416_c0_g3(-1.06697066005)	TRINITY_DN1577_c0_g1(-1.27109622825),TRINITY_DN2576_c0_g2(-1.04508082347),TRINITY_DN2948_c3_g2(-1.25152991183),TRINITY_DN2986_c3_g1(-1.95868262638),TRINITY_DN2990_c3_g1(4.48637222765),TRINITY_DN3344_c2_g2(-1.07984282302),TRINITY_DN3416_c0_g3(-1.06697066005)
GO:0000919	cell plate assembly	biological process	2/234	2/681	0.11774	1	TRINITY_DN2786_c2_g4(-1.88079518437),TRINITY_DN3580_c0_g1(-1.66708596092)	TRINITY_DN2786_c2_g4(-1.88079518437),TRINITY_DN3580_c0_g1(-1.66708596092)
GO:0001756	somitogenesis	biological process	2/234	2/681	0.11774	1	TRINITY_DN2244_c0_g1(-2.14833104305),TRINITY_DN2670_c0_g1(-1.16807489944)	TRINITY_DN2244_c0_g1(-2.14833104305),TRINITY_DN2670_c0_g1(-1.16807489944)
GO:0001947	heart looping	biological process	2/234	2/681	0.11774	1	TRINITY_DN1551_c0_g1(-2.62773240149),TRINITY_DN2990_c3_g1(4.48637222765)	TRINITY_DN1551_c0_g1(-2.62773240149),TRINITY_DN2990_c3_g1(4.48637222765)
GO:0003143	embryonic heart tube morphogenesis	biological process	2/234	2/681	0.11774	1	TRINITY_DN1551_c0_g1(-2.62773240149),TRINITY_DN2990_c3_g1(4.48637222765)	TRINITY_DN1551_c0_g1(-2.62773240149),TRINITY_DN2990_c3_g1(4.48637222765)
GO:0005977	glycogen metabolic process	biological process	2/234	2/681	0.11774	1	TRINITY_DN2955_c0_g3(1.04682740551),TRINITY_DN3502_c0_g1(-1.23001299537)	TRINITY_DN2955_c0_g3(1.04682740551),TRINITY_DN3502_c0_g1(-1.23001299537)
GO:0006112	energy reserve metabolic process	biological process	2/234	2/681	0.11774	1	TRINITY_DN2955_c0_g3(1.04682740551),TRINITY_DN3502_c0_g1(-1.23001299537)	TRINITY_DN2955_c0_g3(1.04682740551),TRINITY_DN3502_c0_g1(-1.23001299537)
GO:0006400	tRNA modification	biological process	2/234	2/681	0.11774	1	TRINITY_DN3002_c7_g7(1.15397086811),TRINITY_DN3522_c0_g2(-1.86254793253)	TRINITY_DN3002_c7_g7(1.15397086811),TRINITY_DN3522_c0_g2(-1.86254793253)
GO:0006471	protein ADP-ribosylation	biological process	2/234	2/681	0.11774	1	TRINITY_DN1267_c0_g1(-3.74317437745),TRINITY_DN1268_c0_g1(-2.06811775799)	TRINITY_DN1267_c0_g1(-3.74317437745),TRINITY_DN1268_c0_g1(-2.06811775799)
GO:0006493	protein O-linked glycosylation	biological process	2/234	2/681	0.11774	1	TRINITY_DN2244_c0_g1(-2.14833104305),TRINITY_DN2670_c0_g1(-1.16807489944)	TRINITY_DN2244_c0_g1(-2.14833104305),TRINITY_DN2670_c0_g1(-1.16807489944)
GO:0006743	ubiquinone metabolic process	biological process	2/234	2/681	0.11774	1	TRINITY_DN767_c0_g1(-1.4406680883),TRINITY_DN877_c0_g2(-2.38734682685)	TRINITY_DN767_c0_g1(-1.4406680883),TRINITY_DN877_c0_g2(-2.38734682685)
GO:0006744	ubiquinone biosynthetic process	biological process	2/234	2/681	0.11774	1	TRINITY_DN767_c0_g1(-1.4406680883),TRINITY_DN877_c0_g2(-2.38734682685)	TRINITY_DN767_c0_g1(-1.4406680883),TRINITY_DN877_c0_g2(-2.38734682685)
GO:0006891	intra-Golgi vesicle-mediated transport	biological process	2/234	2/681	0.11774	1	TRINITY_DN2786_c2_g4(-1.88079518437),TRINITY_DN3580_c0_g1(-1.66708596092)	TRINITY_DN2786_c2_g4(-1.88079518437),TRINITY_DN3580_c0_g1(-1.66708596092)
GO:0007029	endoplasmic reticulum organization	biological process	2/234	2/681	0.11774	1	TRINITY_DN3118_c6_g1(-2.15189148233),TRINITY_DN3252_c2_g1(-1.37996033515)	TRINITY_DN3118_c6_g1(-2.15189148233),TRINITY_DN3252_c2_g1(-1.37996033515)
GO:0007051	spindle organization	biological process	2/234	2/681	0.11774	1	TRINITY_DN1551_c0_g1(-2.62773240149),TRINITY_DN3368_c3_g3(-1.35865189413)	TRINITY_DN1551_c0_g1(-2.62773240149),TRINITY_DN3368_c3_g3(-1.35865189413)
GO:0007052	mitotic spindle organization	biological process	2/234	2/681	0.11774	1	TRINITY_DN1551_c0_g1(-2.62773240149),TRINITY_DN3368_c3_g3(-1.35865189413)	TRINITY_DN1551_c0_g1(-2.62773240149),TRINITY_DN3368_c3_g3(-1.35865189413)
GO:0007095	mitotic G2 DNA damage checkpoint	biological process	2/234	2/681	0.11774	1	TRINITY_DN1577_c0_g1(-1.27109622825),TRINITY_DN3285_c2_g1(-1.58640393684)	TRINITY_DN1577_c0_g1(-1.27109622825),TRINITY_DN3285_c2_g1(-1.58640393684)
GO:0007140	male meiotic nuclear division	biological process	2/234	2/681	0.11774	1	TRINITY_DN2576_c0_g2(-1.04508082347),TRINITY_DN2986_c3_g1(-1.95868262638)	TRINITY_DN2576_c0_g2(-1.04508082347),TRINITY_DN2986_c3_g1(-1.95868262638)
GO:0007143	female meiotic nuclear division	biological process	2/234	2/681	0.11774	1	TRINITY_DN2576_c0_g2(-1.04508082347),TRINITY_DN2986_c3_g1(-1.95868262638)	TRINITY_DN2576_c0_g2(-1.04508082347),TRINITY_DN2986_c3_g1(-1.95868262638)
GO:0009269	response to desiccation	biological process	2/234	2/681	0.11774	1	TRINITY_DN1383_c0_g2(-5.09453204951),TRINITY_DN3502_c0_g1(-1.23001299537)	TRINITY_DN1383_c0_g2(-5.09453204951),TRINITY_DN3502_c0_g1(-1.23001299537)
GO:0009816	defense response to bacterium, incompatible interaction	biological process	2/234	2/681	0.11774	1	TRINITY_DN2670_c2_g4(-1.43011048969),TRINITY_DN3667_c3_g3(-1.03216184042)	TRINITY_DN2670_c2_g4(-1.43011048969),TRINITY_DN3667_c3_g3(-1.03216184042)
GO:0010039	response to iron ion	biological process	2/234	2/681	0.11774	1	TRINITY_DN3455_c5_g4(-1.38140557462),TRINITY_DN3634_c5_g2(-1.43389994753)	TRINITY_DN3455_c5_g4(-1.38140557462),TRINITY_DN3634_c5_g2(-1.43389994753)
GO:0010171	body morphogenesis	biological process	2/234	2/681	0.11774	1	TRINITY_DN1551_c0_g1(-2.62773240149),TRINITY_DN2990_c3_g1(4.48637222765)	TRINITY_DN1551_c0_g1(-2.62773240149),TRINITY_DN2990_c3_g1(4.48637222765)
GO:0010470	regulation of gastrulation	biological process	2/234	2/681	0.11774	1	TRINITY_DN2244_c0_g1(-2.14833104305),TRINITY_DN2670_c0_g1(-1.16807489944)	TRINITY_DN2244_c0_g1(-2.14833104305),TRINITY_DN2670_c0_g1(-1.16807489944)
GO:0016540	protein autoprocessing	biological process	2/234	2/681	0.11774	1	TRINITY_DN2990_c3_g1(4.48637222765),TRINITY_DN3071_c0_g4(-1.25105018748)	TRINITY_DN2990_c3_g1(4.48637222765),TRINITY_DN3071_c0_g4(-1.25105018748)
GO:0018242	protein O-linked glycosylation via serine	biological process	2/234	2/681	0.11774	1	TRINITY_DN2244_c0_g1(-2.14833104305),TRINITY_DN2670_c0_g1(-1.16807489944)	TRINITY_DN2244_c0_g1(-2.14833104305),TRINITY_DN2670_c0_g1(-1.16807489944)
GO:0030900	forebrain development	biological process	2/234	2/681	0.11774	1	TRINITY_DN1551_c0_g1(-2.62773240149),TRINITY_DN2990_c3_g1(4.48637222765)	TRINITY_DN1551_c0_g1(-2.62773240149),TRINITY_DN2990_c3_g1(4.48637222765)
GO:0031109	microtubule polymerization or depolymerization	biological process	2/234	2/681	0.11774	1	TRINITY_DN2881_c4_g1(-2.13230653776),TRINITY_DN3495_c0_g2(-1.90844140963)	TRINITY_DN2881_c4_g1(-2.13230653776),TRINITY_DN3495_c0_g2(-1.90844140963)
GO:0031572	G2 DNA damage checkpoint	biological process	2/234	2/681	0.11774	1	TRINITY_DN1577_c0_g1(-1.27109622825),TRINITY_DN3285_c2_g1(-1.58640393684)	TRINITY_DN1577_c0_g1(-1.27109622825),TRINITY_DN3285_c2_g1(-1.58640393684)
GO:0031581	hemidesmosome assembly	biological process	2/234	2/681	0.11774	1	TRINITY_DN3113_c1_g12(-1.31724482175),TRINITY_DN3629_c0_g1(-1.0197644295)	TRINITY_DN3113_c1_g12(-1.31724482175),TRINITY_DN3629_c0_g1(-1.0197644295)
GO:0033577	protein glycosylation in endoplasmic reticulum	biological process	2/234	2/681	0.11774	1	TRINITY_DN2244_c0_g1(-2.14833104305),TRINITY_DN2670_c0_g1(-1.16807489944)	TRINITY_DN2244_c0_g1(-2.14833104305),TRINITY_DN2670_c0_g1(-1.16807489944)
GO:0035050	embryonic heart tube development	biological process	2/234	2/681	0.11774	1	TRINITY_DN1551_c0_g1(-2.62773240149),TRINITY_DN2990_c3_g1(4.48637222765)	TRINITY_DN1551_c0_g1(-2.62773240149),TRINITY_DN2990_c3_g1(4.48637222765)
GO:0036158	outer dynein arm assembly	biological process	2/234	2/681	0.11774	1	TRINITY_DN3526_c2_g3(-3.28668474605),TRINITY_DN99_c0_g1(-1.6657118923)	TRINITY_DN3526_c2_g3(-3.28668474605),TRINITY_DN99_c0_g1(-1.6657118923)
GO:0042052	rhabdomere development	biological process	2/234	2/681	0.11774	1	TRINITY_DN2244_c0_g1(-2.14833104305),TRINITY_DN2670_c0_g1(-1.16807489944)	TRINITY_DN2244_c0_g1(-2.14833104305),TRINITY_DN2670_c0_g1(-1.16807489944)
GO:0044818	mitotic G2/M transition checkpoint	biological process	2/234	2/681	0.11774	1	TRINITY_DN1577_c0_g1(-1.27109622825),TRINITY_DN3285_c2_g1(-1.58640393684)	TRINITY_DN1577_c0_g1(-1.27109622825),TRINITY_DN3285_c2_g1(-1.58640393684)
GO:0045226	extracellular polysaccharide biosynthetic process	biological process	2/234	2/681	0.11774	1	TRINITY_DN2244_c0_g1(-2.14833104305),TRINITY_DN2670_c0_g1(-1.16807489944)	TRINITY_DN2244_c0_g1(-2.14833104305),TRINITY_DN2670_c0_g1(-1.16807489944)
GO:0045227	capsule polysaccharide biosynthetic process	biological process	2/234	2/681	0.11774	1	TRINITY_DN2244_c0_g1(-2.14833104305),TRINITY_DN2670_c0_g1(-1.16807489944)	TRINITY_DN2244_c0_g1(-2.14833104305),TRINITY_DN2670_c0_g1(-1.16807489944)
GO:0045230	capsule organization	biological process	2/234	2/681	0.11774	1	TRINITY_DN2244_c0_g1(-2.14833104305),TRINITY_DN2670_c0_g1(-1.16807489944)	TRINITY_DN2244_c0_g1(-2.14833104305),TRINITY_DN2670_c0_g1(-1.16807489944)
GO:0045582	positive regulation of T cell differentiation	biological process	2/234	2/681	0.11774	1	TRINITY_DN2863_c0_g2(-1.17670982061),TRINITY_DN2990_c3_g1(4.48637222765)	TRINITY_DN2863_c0_g2(-1.17670982061),TRINITY_DN2990_c3_g1(4.48637222765)
GO:0045621	positive regulation of lymphocyte differentiation	biological process	2/234	2/681	0.11774	1	TRINITY_DN2863_c0_g2(-1.17670982061),TRINITY_DN2990_c3_g1(4.48637222765)	TRINITY_DN2863_c0_g2(-1.17670982061),TRINITY_DN2990_c3_g1(4.48637222765)
GO:0045746	negative regulation of Notch signaling pathway	biological process	2/234	2/681	0.11774	1	TRINITY_DN2244_c0_g1(-2.14833104305),TRINITY_DN2670_c0_g1(-1.16807489944)	TRINITY_DN2244_c0_g1(-2.14833104305),TRINITY_DN2670_c0_g1(-1.16807489944)
GO:0045793	positive regulation of cell size	biological process	2/234	2/681	0.11774	1	TRINITY_DN3034_c3_g2(-2.78869539746),TRINITY_DN3343_c1_g7(1.11505558557)	TRINITY_DN3034_c3_g2(-2.78869539746),TRINITY_DN3343_c1_g7(1.11505558557)
GO:0046488	phosphatidylinositol metabolic process	biological process	2/234	2/681	0.11774	1	TRINITY_DN2767_c3_g3(-1.67248354228),TRINITY_DN3039_c1_g2(-1.41066512147)	TRINITY_DN2767_c3_g3(-1.67248354228),TRINITY_DN3039_c1_g2(-1.41066512147)
GO:0046785	microtubule polymerization	biological process	2/234	2/681	0.11774	1	TRINITY_DN2881_c4_g1(-2.13230653776),TRINITY_DN3495_c0_g2(-1.90844140963)	TRINITY_DN2881_c4_g1(-2.13230653776),TRINITY_DN3495_c0_g2(-1.90844140963)
GO:0048318	axial mesoderm development	biological process	2/234	2/681	0.11774	1	TRINITY_DN2244_c0_g1(-2.14833104305),TRINITY_DN2670_c0_g1(-1.16807489944)	TRINITY_DN2244_c0_g1(-2.14833104305),TRINITY_DN2670_c0_g1(-1.16807489944)
GO:0048339	paraxial mesoderm development	biological process	2/234	2/681	0.11774	1	TRINITY_DN2244_c0_g1(-2.14833104305),TRINITY_DN2670_c0_g1(-1.16807489944)	TRINITY_DN2244_c0_g1(-2.14833104305),TRINITY_DN2670_c0_g1(-1.16807489944)
GO:0051225	spindle assembly	biological process	2/234	2/681	0.11774	1	TRINITY_DN1551_c0_g1(-2.62773240149),TRINITY_DN3368_c3_g3(-1.35865189413)	TRINITY_DN1551_c0_g1(-2.62773240149),TRINITY_DN3368_c3_g3(-1.35865189413)
GO:0061371	determination of heart left/right asymmetry	biological process	2/234	2/681	0.11774	1	TRINITY_DN1551_c0_g1(-2.62773240149),TRINITY_DN2990_c3_g1(4.48637222765)	TRINITY_DN1551_c0_g1(-2.62773240149),TRINITY_DN2990_c3_g1(4.48637222765)
GO:0071281	cellular response to iron ion	biological process	2/234	2/681	0.11774	1	TRINITY_DN3455_c5_g4(-1.38140557462),TRINITY_DN3634_c5_g2(-1.43389994753)	TRINITY_DN3455_c5_g4(-1.38140557462),TRINITY_DN3634_c5_g2(-1.43389994753)
GO:0071369	cellular response to ethylene stimulus	biological process	2/234	2/681	0.11774	1	TRINITY_DN3455_c5_g4(-1.38140557462),TRINITY_DN3634_c5_g2(-1.43389994753)	TRINITY_DN3455_c5_g4(-1.38140557462),TRINITY_DN3634_c5_g2(-1.43389994753)
GO:0071731	response to nitric oxide	biological process	2/234	2/681	0.11774	1	TRINITY_DN3455_c5_g4(-1.38140557462),TRINITY_DN3634_c5_g2(-1.43389994753)	TRINITY_DN3455_c5_g4(-1.38140557462),TRINITY_DN3634_c5_g2(-1.43389994753)
GO:0071732	cellular response to nitric oxide	biological process	2/234	2/681	0.11774	1	TRINITY_DN3455_c5_g4(-1.38140557462),TRINITY_DN3634_c5_g2(-1.43389994753)	TRINITY_DN3455_c5_g4(-1.38140557462),TRINITY_DN3634_c5_g2(-1.43389994753)
GO:0071786	endoplasmic reticulum tubular network organization	biological process	2/234	2/681	0.11774	1	TRINITY_DN3118_c6_g1(-2.15189148233),TRINITY_DN3252_c2_g1(-1.37996033515)	TRINITY_DN3118_c6_g1(-2.15189148233),TRINITY_DN3252_c2_g1(-1.37996033515)
GO:0097366	response to bronchodilator	biological process	2/234	2/681	0.11774	1	TRINITY_DN3455_c5_g4(-1.38140557462),TRINITY_DN3634_c5_g2(-1.43389994753)	TRINITY_DN3455_c5_g4(-1.38140557462),TRINITY_DN3634_c5_g2(-1.43389994753)
GO:1901661	quinone metabolic process	biological process	2/234	2/681	0.11774	1	TRINITY_DN767_c0_g1(-1.4406680883),TRINITY_DN877_c0_g2(-2.38734682685)	TRINITY_DN767_c0_g1(-1.4406680883),TRINITY_DN877_c0_g2(-2.38734682685)
GO:1901663	quinone biosynthetic process	biological process	2/234	2/681	0.11774	1	TRINITY_DN767_c0_g1(-1.4406680883),TRINITY_DN877_c0_g2(-2.38734682685)	TRINITY_DN767_c0_g1(-1.4406680883),TRINITY_DN877_c0_g2(-2.38734682685)
GO:1902170	cellular response to reactive nitrogen species	biological process	2/234	2/681	0.11774	1	TRINITY_DN3455_c5_g4(-1.38140557462),TRINITY_DN3634_c5_g2(-1.43389994753)	TRINITY_DN3455_c5_g4(-1.38140557462),TRINITY_DN3634_c5_g2(-1.43389994753)
GO:2000035	regulation of stem cell division	biological process	2/234	2/681	0.11774	1	TRINITY_DN2244_c0_g1(-2.14833104305),TRINITY_DN2670_c0_g1(-1.16807489944)	TRINITY_DN2244_c0_g1(-2.14833104305),TRINITY_DN2670_c0_g1(-1.16807489944)
GO:0001751	compound eye photoreceptor cell differentiation	biological process	3/234	4/681	0.1198	1	TRINITY_DN2244_c0_g1(-2.14833104305),TRINITY_DN2670_c0_g1(-1.16807489944),TRINITY_DN2990_c3_g1(4.48637222765)	TRINITY_DN2244_c0_g1(-2.14833104305),TRINITY_DN2670_c0_g1(-1.16807489944),TRINITY_DN2990_c3_g1(4.48637222765)
GO:0001754	eye photoreceptor cell differentiation	biological process	3/234	4/681	0.1198	1	TRINITY_DN2244_c0_g1(-2.14833104305),TRINITY_DN2670_c0_g1(-1.16807489944),TRINITY_DN2990_c3_g1(4.48637222765)	TRINITY_DN2244_c0_g1(-2.14833104305),TRINITY_DN2670_c0_g1(-1.16807489944),TRINITY_DN2990_c3_g1(4.48637222765)
GO:0003376	sphingosine-1-phosphate signaling pathway	biological process	3/234	4/681	0.1198	1	TRINITY_DN2948_c3_g2(-1.25152991183),TRINITY_DN3344_c2_g2(-1.07984282302),TRINITY_DN3416_c0_g3(-1.06697066005)	TRINITY_DN2948_c3_g2(-1.25152991183),TRINITY_DN3344_c2_g2(-1.07984282302),TRINITY_DN3416_c0_g3(-1.06697066005)
GO:0007040	lysosome organization	biological process	3/234	4/681	0.1198	1	TRINITY_DN2948_c3_g2(-1.25152991183),TRINITY_DN3344_c2_g2(-1.07984282302),TRINITY_DN3416_c0_g3(-1.06697066005)	TRINITY_DN2948_c3_g2(-1.25152991183),TRINITY_DN3344_c2_g2(-1.07984282302),TRINITY_DN3416_c0_g3(-1.06697066005)
GO:0007498	mesoderm development	biological process	3/234	4/681	0.1198	1	TRINITY_DN2244_c0_g1(-2.14833104305),TRINITY_DN2670_c0_g1(-1.16807489944),TRINITY_DN2990_c3_g1(4.48637222765)	TRINITY_DN2244_c0_g1(-2.14833104305),TRINITY_DN2670_c0_g1(-1.16807489944),TRINITY_DN2990_c3_g1(4.48637222765)
GO:0007528	neuromuscular junction development	biological process	3/234	4/681	0.1198	1	TRINITY_DN2948_c3_g2(-1.25152991183),TRINITY_DN3344_c2_g2(-1.07984282302),TRINITY_DN3416_c0_g3(-1.06697066005)	TRINITY_DN2948_c3_g2(-1.25152991183),TRINITY_DN3344_c2_g2(-1.07984282302),TRINITY_DN3416_c0_g3(-1.06697066005)
GO:0008033	tRNA processing	biological process	3/234	4/681	0.1198	1	TRINITY_DN3002_c7_g7(1.15397086811),TRINITY_DN3522_c0_g2(-1.86254793253),TRINITY_DN3602_c4_g2(-2.95532582631)	TRINITY_DN3002_c7_g7(1.15397086811),TRINITY_DN3522_c0_g2(-1.86254793253),TRINITY_DN3602_c4_g2(-2.95532582631)
GO:0008101	decapentaplegic signaling pathway	biological process	3/234	4/681	0.1198	1	TRINITY_DN2948_c3_g2(-1.25152991183),TRINITY_DN3344_c2_g2(-1.07984282302),TRINITY_DN3416_c0_g3(-1.06697066005)	TRINITY_DN2948_c3_g2(-1.25152991183),TRINITY_DN3344_c2_g2(-1.07984282302),TRINITY_DN3416_c0_g3(-1.06697066005)
GO:0008582	regulation of synaptic growth at neuromuscular junction	biological process	3/234	4/681	0.1198	1	TRINITY_DN2948_c3_g2(-1.25152991183),TRINITY_DN3344_c2_g2(-1.07984282302),TRINITY_DN3416_c0_g3(-1.06697066005)	TRINITY_DN2948_c3_g2(-1.25152991183),TRINITY_DN3344_c2_g2(-1.07984282302),TRINITY_DN3416_c0_g3(-1.06697066005)
GO:0008593	regulation of Notch signaling pathway	biological process	3/234	4/681	0.1198	1	TRINITY_DN2244_c0_g1(-2.14833104305),TRINITY_DN2670_c0_g1(-1.16807489944),TRINITY_DN2863_c0_g2(-1.17670982061)	TRINITY_DN2244_c0_g1(-2.14833104305),TRINITY_DN2670_c0_g1(-1.16807489944),TRINITY_DN2863_c0_g2(-1.17670982061)
GO:0009952	anterior/posterior pattern specification	biological process	3/234	4/681	0.1198	1	TRINITY_DN2244_c0_g1(-2.14833104305),TRINITY_DN2670_c0_g1(-1.16807489944),TRINITY_DN2990_c3_g1(4.48637222765)	TRINITY_DN2244_c0_g1(-2.14833104305),TRINITY_DN2670_c0_g1(-1.16807489944),TRINITY_DN2990_c3_g1(4.48637222765)
GO:0017145	stem cell division	biological process	3/234	4/681	0.1198	1	TRINITY_DN2244_c0_g1(-2.14833104305),TRINITY_DN2670_c0_g1(-1.16807489944),TRINITY_DN2990_c3_g1(4.48637222765)	TRINITY_DN2244_c0_g1(-2.14833104305),TRINITY_DN2670_c0_g1(-1.16807489944),TRINITY_DN2990_c3_g1(4.48637222765)
GO:0032535	regulation of cellular component size	biological process	3/234	4/681	0.1198	1	TRINITY_DN2624_c3_g2(-1.7395971044),TRINITY_DN3034_c3_g2(-2.78869539746),TRINITY_DN3343_c1_g7(1.11505558557)	TRINITY_DN2624_c3_g2(-1.7395971044),TRINITY_DN3034_c3_g2(-2.78869539746),TRINITY_DN3343_c1_g7(1.11505558557)
GO:0035193	larval central nervous system remodeling	biological process	3/234	4/681	0.1198	1	TRINITY_DN2948_c3_g2(-1.25152991183),TRINITY_DN3344_c2_g2(-1.07984282302),TRINITY_DN3416_c0_g3(-1.06697066005)	TRINITY_DN2948_c3_g2(-1.25152991183),TRINITY_DN3344_c2_g2(-1.07984282302),TRINITY_DN3416_c0_g3(-1.06697066005)
GO:0036465	synaptic vesicle recycling	biological process	3/234	4/681	0.1198	1	TRINITY_DN2948_c3_g2(-1.25152991183),TRINITY_DN3344_c2_g2(-1.07984282302),TRINITY_DN3416_c0_g3(-1.06697066005)	TRINITY_DN2948_c3_g2(-1.25152991183),TRINITY_DN3344_c2_g2(-1.07984282302),TRINITY_DN3416_c0_g3(-1.06697066005)
GO:0045005	DNA-dependent DNA replication maintenance of fidelity	biological process	3/234	4/681	0.1198	1	TRINITY_DN1577_c0_g1(-1.27109622825),TRINITY_DN2834_c2_g1(-1.88177373969),TRINITY_DN3311_c1_g2(-1.13281740221)	TRINITY_DN1577_c0_g1(-1.27109622825),TRINITY_DN2834_c2_g1(-1.88177373969),TRINITY_DN3311_c1_g2(-1.13281740221)
GO:0045477	regulation of nurse cell apoptotic process	biological process	3/234	4/681	0.1198	1	TRINITY_DN2948_c3_g2(-1.25152991183),TRINITY_DN3344_c2_g2(-1.07984282302),TRINITY_DN3416_c0_g3(-1.06697066005)	TRINITY_DN2948_c3_g2(-1.25152991183),TRINITY_DN3344_c2_g2(-1.07984282302),TRINITY_DN3416_c0_g3(-1.06697066005)
GO:0045924	regulation of female receptivity	biological process	3/234	4/681	0.1198	1	TRINITY_DN2948_c3_g2(-1.25152991183),TRINITY_DN3344_c2_g2(-1.07984282302),TRINITY_DN3416_c0_g3(-1.06697066005)	TRINITY_DN2948_c3_g2(-1.25152991183),TRINITY_DN3344_c2_g2(-1.07984282302),TRINITY_DN3416_c0_g3(-1.06697066005)
GO:0048488	synaptic vesicle endocytosis	biological process	3/234	4/681	0.1198	1	TRINITY_DN2948_c3_g2(-1.25152991183),TRINITY_DN3344_c2_g2(-1.07984282302),TRINITY_DN3416_c0_g3(-1.06697066005)	TRINITY_DN2948_c3_g2(-1.25152991183),TRINITY_DN3344_c2_g2(-1.07984282302),TRINITY_DN3416_c0_g3(-1.06697066005)
GO:0051054	positive regulation of DNA metabolic process	biological process	3/234	4/681	0.1198	1	TRINITY_DN1268_c0_g1(-2.06811775799),TRINITY_DN3034_c3_g2(-2.78869539746),TRINITY_DN3311_c1_g2(-1.13281740221)	TRINITY_DN1268_c0_g1(-2.06811775799),TRINITY_DN3034_c3_g2(-2.78869539746),TRINITY_DN3311_c1_g2(-1.13281740221)
GO:0051124	synaptic growth at neuromuscular junction	biological process	3/234	4/681	0.1198	1	TRINITY_DN2948_c3_g2(-1.25152991183),TRINITY_DN3344_c2_g2(-1.07984282302),TRINITY_DN3416_c0_g3(-1.06697066005)	TRINITY_DN2948_c3_g2(-1.25152991183),TRINITY_DN3344_c2_g2(-1.07984282302),TRINITY_DN3416_c0_g3(-1.06697066005)
GO:0051963	regulation of synapse assembly	biological process	3/234	4/681	0.1198	1	TRINITY_DN2948_c3_g2(-1.25152991183),TRINITY_DN3344_c2_g2(-1.07984282302),TRINITY_DN3416_c0_g3(-1.06697066005)	TRINITY_DN2948_c3_g2(-1.25152991183),TRINITY_DN3344_c2_g2(-1.07984282302),TRINITY_DN3416_c0_g3(-1.06697066005)
GO:0060180	female mating behavior	biological process	3/234	4/681	0.1198	1	TRINITY_DN2948_c3_g2(-1.25152991183),TRINITY_DN3344_c2_g2(-1.07984282302),TRINITY_DN3416_c0_g3(-1.06697066005)	TRINITY_DN2948_c3_g2(-1.25152991183),TRINITY_DN3344_c2_g2(-1.07984282302),TRINITY_DN3416_c0_g3(-1.06697066005)
GO:0060294	cilium movement involved in cell motility	biological process	3/234	4/681	0.1198	1	TRINITY_DN1245_c0_g2(-3.43593361414),TRINITY_DN3526_c2_g3(-3.28668474605),TRINITY_DN99_c0_g1(-1.6657118923)	TRINITY_DN1245_c0_g2(-3.43593361414),TRINITY_DN3526_c2_g3(-3.28668474605),TRINITY_DN99_c0_g1(-1.6657118923)
GO:0072358	cardiovascular system development	biological process	3/234	4/681	0.1198	1	TRINITY_DN2244_c0_g1(-2.14833104305),TRINITY_DN2670_c0_g1(-1.16807489944),TRINITY_DN2990_c3_g1(4.48637222765)	TRINITY_DN2244_c0_g1(-2.14833104305),TRINITY_DN2670_c0_g1(-1.16807489944),TRINITY_DN2990_c3_g1(4.48637222765)
GO:0080171	lytic vacuole organization	biological process	3/234	4/681	0.1198	1	TRINITY_DN2948_c3_g2(-1.25152991183),TRINITY_DN3344_c2_g2(-1.07984282302),TRINITY_DN3416_c0_g3(-1.06697066005)	TRINITY_DN2948_c3_g2(-1.25152991183),TRINITY_DN3344_c2_g2(-1.07984282302),TRINITY_DN3416_c0_g3(-1.06697066005)
GO:0090066	regulation of anatomical structure size	biological process	3/234	4/681	0.1198	1	TRINITY_DN2624_c3_g2(-1.7395971044),TRINITY_DN3034_c3_g2(-2.78869539746),TRINITY_DN3343_c1_g7(1.11505558557)	TRINITY_DN2624_c3_g2(-1.7395971044),TRINITY_DN3034_c3_g2(-2.78869539746),TRINITY_DN3343_c1_g7(1.11505558557)
GO:0090097	regulation of decapentaplegic signaling pathway	biological process	3/234	4/681	0.1198	1	TRINITY_DN2948_c3_g2(-1.25152991183),TRINITY_DN3344_c2_g2(-1.07984282302),TRINITY_DN3416_c0_g3(-1.06697066005)	TRINITY_DN2948_c3_g2(-1.25152991183),TRINITY_DN3344_c2_g2(-1.07984282302),TRINITY_DN3416_c0_g3(-1.06697066005)
GO:0090099	negative regulation of decapentaplegic signaling pathway	biological process	3/234	4/681	0.1198	1	TRINITY_DN2948_c3_g2(-1.25152991183),TRINITY_DN3344_c2_g2(-1.07984282302),TRINITY_DN3416_c0_g3(-1.06697066005)	TRINITY_DN2948_c3_g2(-1.25152991183),TRINITY_DN3344_c2_g2(-1.07984282302),TRINITY_DN3416_c0_g3(-1.06697066005)
GO:0090520	sphingolipid mediated signaling pathway	biological process	3/234	4/681	0.1198	1	TRINITY_DN2948_c3_g2(-1.25152991183),TRINITY_DN3344_c2_g2(-1.07984282302),TRINITY_DN3416_c0_g3(-1.06697066005)	TRINITY_DN2948_c3_g2(-1.25152991183),TRINITY_DN3344_c2_g2(-1.07984282302),TRINITY_DN3416_c0_g3(-1.06697066005)
GO:0099003	vesicle-mediated transport in synapse	biological process	3/234	4/681	0.1198	1	TRINITY_DN2948_c3_g2(-1.25152991183),TRINITY_DN3344_c2_g2(-1.07984282302),TRINITY_DN3416_c0_g3(-1.06697066005)	TRINITY_DN2948_c3_g2(-1.25152991183),TRINITY_DN3344_c2_g2(-1.07984282302),TRINITY_DN3416_c0_g3(-1.06697066005)
GO:0099504	synaptic vesicle cycle	biological process	3/234	4/681	0.1198	1	TRINITY_DN2948_c3_g2(-1.25152991183),TRINITY_DN3344_c2_g2(-1.07984282302),TRINITY_DN3416_c0_g3(-1.06697066005)	TRINITY_DN2948_c3_g2(-1.25152991183),TRINITY_DN3344_c2_g2(-1.07984282302),TRINITY_DN3416_c0_g3(-1.06697066005)
GO:1904396	regulation of neuromuscular junction development	biological process	3/234	4/681	0.1198	1	TRINITY_DN2948_c3_g2(-1.25152991183),TRINITY_DN3344_c2_g2(-1.07984282302),TRINITY_DN3416_c0_g3(-1.06697066005)	TRINITY_DN2948_c3_g2(-1.25152991183),TRINITY_DN3344_c2_g2(-1.07984282302),TRINITY_DN3416_c0_g3(-1.06697066005)
GO:1904748	regulation of apoptotic process involved in development	biological process	3/234	4/681	0.1198	1	TRINITY_DN2948_c3_g2(-1.25152991183),TRINITY_DN3344_c2_g2(-1.07984282302),TRINITY_DN3416_c0_g3(-1.06697066005)	TRINITY_DN2948_c3_g2(-1.25152991183),TRINITY_DN3344_c2_g2(-1.07984282302),TRINITY_DN3416_c0_g3(-1.06697066005)
GO:0009607	response to biotic stimulus	biological process	23/234	54/681	0.12019	1	TRINITY_DN1383_c0_g2(-5.09453204951),TRINITY_DN1453_c0_g1(-2.82693098456),TRINITY_DN2506_c1_g2(2.69390264406),TRINITY_DN2522_c0_g1(1.71353669634),TRINITY_DN2610_c4_g1(-1.54090835941),TRINITY_DN2618_c2_g3(1.16746035949),TRINITY_DN2638_c4_g1(-1.94308971346),TRINITY_DN2638_c4_g3(-1.69613457802),TRINITY_DN2670_c2_g4(-1.43011048969),TRINITY_DN2670_c2_g6(-1.02619526061),TRINITY_DN2727_c2_g2(2.807008948…	TRINITY_DN1383_c0_g2(-5.09453204951),TRINITY_DN1453_c0_g1(-2.82693098456),TRINITY_DN2506_c1_g2(2.69390264406),TRINITY_DN2522_c0_g1(1.71353669634),TRINITY_DN2610_c4_g1(-1.54090835941),TRINITY_DN2618_c2_g3(1.16746035949),TRINITY_DN2638_c4_g1(-1.94308971346),TRINITY_DN2638_c4_g3(-1.69613457802),TRINITY_DN2670_c2_g4(-1.43011048969),TRINITY_DN2670_c2_g6(-1.02619526061),TRINITY_DN2727_c2_g2(2.807008948…
GO:0009966	regulation of signal transduction	biological process	23/234	54/681	0.12019	1	TRINITY_DN1357_c0_g1(-2.55339730538),TRINITY_DN1896_c0_g1(-1.43122376696),TRINITY_DN2244_c0_g1(-2.14833104305),TRINITY_DN2512_c2_g5(-3.78741905927),TRINITY_DN2618_c2_g3(1.16746035949),TRINITY_DN2670_c0_g1(-1.16807489944),TRINITY_DN2677_c1_g2(1.75084897723),TRINITY_DN2863_c0_g2(-1.17670982061),TRINITY_DN2948_c3_g2(-1.25152991183),TRINITY_DN2990_c3_g1(4.48637222765),TRINITY_DN2991_c1_g2(-1.38723740…	TRINITY_DN1357_c0_g1(-2.55339730538),TRINITY_DN1896_c0_g1(-1.43122376696),TRINITY_DN2244_c0_g1(-2.14833104305),TRINITY_DN2512_c2_g5(-3.78741905927),TRINITY_DN2618_c2_g3(1.16746035949),TRINITY_DN2670_c0_g1(-1.16807489944),TRINITY_DN2677_c1_g2(1.75084897723),TRINITY_DN2863_c0_g2(-1.17670982061),TRINITY_DN2948_c3_g2(-1.25152991183),TRINITY_DN2990_c3_g1(4.48637222765),TRINITY_DN2991_c1_g2(-1.38723740…
GO:0009267	cellular response to starvation	biological process	9/234	18/681	0.12331	1	TRINITY_DN2618_c2_g3(1.16746035949),TRINITY_DN2948_c3_g2(-1.25152991183),TRINITY_DN3311_c1_g2(-1.13281740221),TRINITY_DN3344_c2_g2(-1.07984282302),TRINITY_DN3416_c0_g3(-1.06697066005),TRINITY_DN3512_c0_g2(-1.87901474245),TRINITY_DN3520_c4_g1(1.22629129786),TRINITY_DN3656_c1_g1(-2.08721167236),TRINITY_DN3656_c1_g5(-3.02684114829)	TRINITY_DN2618_c2_g3(1.16746035949),TRINITY_DN2948_c3_g2(-1.25152991183),TRINITY_DN3311_c1_g2(-1.13281740221),TRINITY_DN3344_c2_g2(-1.07984282302),TRINITY_DN3416_c0_g3(-1.06697066005),TRINITY_DN3512_c0_g2(-1.87901474245),TRINITY_DN3520_c4_g1(1.22629129786),TRINITY_DN3656_c1_g1(-2.08721167236),TRINITY_DN3656_c1_g5(-3.02684114829)
GO:0031399	regulation of protein modification process	biological process	11/234	23/681	0.12409	1	TRINITY_DN1268_c0_g1(-2.06811775799),TRINITY_DN1551_c0_g1(-2.62773240149),TRINITY_DN2618_c2_g3(1.16746035949),TRINITY_DN2990_c3_g1(4.48637222765),TRINITY_DN3034_c4_g1(-2.34785465768),TRINITY_DN3135_c2_g3(1.84163748525),TRINITY_DN3238_c1_g1(4.68706194956),TRINITY_DN3355_c2_g2(-1.83919966724),TRINITY_DN3512_c0_g2(-1.87901474245),TRINITY_DN3656_c1_g1(-2.08721167236),TRINITY_DN3656_c1_g5(-3.026841148…	TRINITY_DN1268_c0_g1(-2.06811775799),TRINITY_DN1551_c0_g1(-2.62773240149),TRINITY_DN2618_c2_g3(1.16746035949),TRINITY_DN2990_c3_g1(4.48637222765),TRINITY_DN3034_c4_g1(-2.34785465768),TRINITY_DN3135_c2_g3(1.84163748525),TRINITY_DN3238_c1_g1(4.68706194956),TRINITY_DN3355_c2_g2(-1.83919966724),TRINITY_DN3512_c0_g2(-1.87901474245),TRINITY_DN3656_c1_g1(-2.08721167236),TRINITY_DN3656_c1_g5(-3.026841148…
GO:0051052	regulation of DNA metabolic process	biological process	6/234	11/681	0.13625	1	TRINITY_DN1268_c0_g1(-2.06811775799),TRINITY_DN1577_c0_g1(-1.27109622825),TRINITY_DN2834_c2_g1(-1.88177373969),TRINITY_DN3034_c3_g2(-2.78869539746),TRINITY_DN3311_c1_g2(-1.13281740221),TRINITY_DN3593_c3_g1(-1.127844984)	TRINITY_DN1268_c0_g1(-2.06811775799),TRINITY_DN1577_c0_g1(-1.27109622825),TRINITY_DN2834_c2_g1(-1.88177373969),TRINITY_DN3034_c3_g2(-2.78869539746),TRINITY_DN3311_c1_g2(-1.13281740221),TRINITY_DN3593_c3_g1(-1.127844984)
GO:0071214	cellular response to abiotic stimulus	biological process	6/234	11/681	0.13625	1	TRINITY_DN3135_c2_g3(1.84163748525),TRINITY_DN3238_c1_g1(4.68706194956),TRINITY_DN3311_c1_g2(-1.13281740221),TRINITY_DN3355_c2_g2(-1.83919966724),TRINITY_DN3368_c3_g4(-1.07708134491),TRINITY_DN3502_c0_g1(-1.23001299537)	TRINITY_DN3135_c2_g3(1.84163748525),TRINITY_DN3238_c1_g1(4.68706194956),TRINITY_DN3311_c1_g2(-1.13281740221),TRINITY_DN3355_c2_g2(-1.83919966724),TRINITY_DN3368_c3_g4(-1.07708134491),TRINITY_DN3502_c0_g1(-1.23001299537)
GO:0104004	cellular response to environmental stimulus	biological process	6/234	11/681	0.13625	1	TRINITY_DN3135_c2_g3(1.84163748525),TRINITY_DN3238_c1_g1(4.68706194956),TRINITY_DN3311_c1_g2(-1.13281740221),TRINITY_DN3355_c2_g2(-1.83919966724),TRINITY_DN3368_c3_g4(-1.07708134491),TRINITY_DN3502_c0_g1(-1.23001299537)	TRINITY_DN3135_c2_g3(1.84163748525),TRINITY_DN3238_c1_g1(4.68706194956),TRINITY_DN3311_c1_g2(-1.13281740221),TRINITY_DN3355_c2_g2(-1.83919966724),TRINITY_DN3368_c3_g4(-1.07708134491),TRINITY_DN3502_c0_g1(-1.23001299537)
GO:0007276	gamete generation	biological process	12/234	26/681	0.14044	1	TRINITY_DN1577_c0_g1(-1.27109622825),TRINITY_DN2576_c0_g2(-1.04508082347),TRINITY_DN2948_c3_g2(-1.25152991183),TRINITY_DN2986_c3_g1(-1.95868262638),TRINITY_DN2990_c3_g1(4.48637222765),TRINITY_DN3160_c3_g6(1.13017127252),TRINITY_DN3282_c0_g4(1.20593803666),TRINITY_DN3344_c2_g2(-1.07984282302),TRINITY_DN3416_c0_g3(-1.06697066005),TRINITY_DN3466_c5_g2(-1.56168631845),TRINITY_DN3602_c4_g2(-2.95532582…	TRINITY_DN1577_c0_g1(-1.27109622825),TRINITY_DN2576_c0_g2(-1.04508082347),TRINITY_DN2948_c3_g2(-1.25152991183),TRINITY_DN2986_c3_g1(-1.95868262638),TRINITY_DN2990_c3_g1(4.48637222765),TRINITY_DN3160_c3_g6(1.13017127252),TRINITY_DN3282_c0_g4(1.20593803666),TRINITY_DN3344_c2_g2(-1.07984282302),TRINITY_DN3416_c0_g3(-1.06697066005),TRINITY_DN3466_c5_g2(-1.56168631845),TRINITY_DN3602_c4_g2(-2.95532582…
GO:0007417	central nervous system development	biological process	8/234	16/681	0.1435	1	TRINITY_DN1551_c0_g1(-2.62773240149),TRINITY_DN2948_c3_g2(-1.25152991183),TRINITY_DN2990_c3_g1(4.48637222765),TRINITY_DN3160_c3_g6(1.13017127252),TRINITY_DN3282_c0_g4(1.20593803666),TRINITY_DN3344_c2_g2(-1.07984282302),TRINITY_DN3416_c0_g3(-1.06697066005),TRINITY_DN483_c0_g1(-1.37439231237)	TRINITY_DN1551_c0_g1(-2.62773240149),TRINITY_DN2948_c3_g2(-1.25152991183),TRINITY_DN2990_c3_g1(4.48637222765),TRINITY_DN3160_c3_g6(1.13017127252),TRINITY_DN3282_c0_g4(1.20593803666),TRINITY_DN3344_c2_g2(-1.07984282302),TRINITY_DN3416_c0_g3(-1.06697066005),TRINITY_DN483_c0_g1(-1.37439231237)
GO:0010562	positive regulation of phosphorus metabolic process	biological process	8/234	16/681	0.1435	1	TRINITY_DN1551_c0_g1(-2.62773240149),TRINITY_DN2618_c2_g3(1.16746035949),TRINITY_DN3135_c2_g3(1.84163748525),TRINITY_DN3238_c1_g1(4.68706194956),TRINITY_DN3355_c2_g2(-1.83919966724),TRINITY_DN3512_c0_g2(-1.87901474245),TRINITY_DN3656_c1_g1(-2.08721167236),TRINITY_DN3656_c1_g5(-3.02684114829)	TRINITY_DN1551_c0_g1(-2.62773240149),TRINITY_DN2618_c2_g3(1.16746035949),TRINITY_DN3135_c2_g3(1.84163748525),TRINITY_DN3238_c1_g1(4.68706194956),TRINITY_DN3355_c2_g2(-1.83919966724),TRINITY_DN3512_c0_g2(-1.87901474245),TRINITY_DN3656_c1_g1(-2.08721167236),TRINITY_DN3656_c1_g5(-3.02684114829)
GO:0045859	regulation of protein kinase activity	biological process	8/234	16/681	0.1435	1	TRINITY_DN1551_c0_g1(-2.62773240149),TRINITY_DN2618_c2_g3(1.16746035949),TRINITY_DN3135_c2_g3(1.84163748525),TRINITY_DN3238_c1_g1(4.68706194956),TRINITY_DN3355_c2_g2(-1.83919966724),TRINITY_DN3512_c0_g2(-1.87901474245),TRINITY_DN3656_c1_g1(-2.08721167236),TRINITY_DN3656_c1_g5(-3.02684114829)	TRINITY_DN1551_c0_g1(-2.62773240149),TRINITY_DN2618_c2_g3(1.16746035949),TRINITY_DN3135_c2_g3(1.84163748525),TRINITY_DN3238_c1_g1(4.68706194956),TRINITY_DN3355_c2_g2(-1.83919966724),TRINITY_DN3512_c0_g2(-1.87901474245),TRINITY_DN3656_c1_g1(-2.08721167236),TRINITY_DN3656_c1_g5(-3.02684114829)
GO:0045937	positive regulation of phosphate metabolic process	biological process	8/234	16/681	0.1435	1	TRINITY_DN1551_c0_g1(-2.62773240149),TRINITY_DN2618_c2_g3(1.16746035949),TRINITY_DN3135_c2_g3(1.84163748525),TRINITY_DN3238_c1_g1(4.68706194956),TRINITY_DN3355_c2_g2(-1.83919966724),TRINITY_DN3512_c0_g2(-1.87901474245),TRINITY_DN3656_c1_g1(-2.08721167236),TRINITY_DN3656_c1_g5(-3.02684114829)	TRINITY_DN1551_c0_g1(-2.62773240149),TRINITY_DN2618_c2_g3(1.16746035949),TRINITY_DN3135_c2_g3(1.84163748525),TRINITY_DN3238_c1_g1(4.68706194956),TRINITY_DN3355_c2_g2(-1.83919966724),TRINITY_DN3512_c0_g2(-1.87901474245),TRINITY_DN3656_c1_g1(-2.08721167236),TRINITY_DN3656_c1_g5(-3.02684114829)
GO:0010564	regulation of cell cycle process	biological process	10/234	21/681	0.14358	1	TRINITY_DN1551_c0_g1(-2.62773240149),TRINITY_DN1577_c0_g1(-1.27109622825),TRINITY_DN2618_c2_g3(1.16746035949),TRINITY_DN2830_c1_g6(-2.81950059698),TRINITY_DN3034_c3_g2(-2.78869539746),TRINITY_DN3285_c2_g1(-1.58640393684),TRINITY_DN3512_c0_g2(-1.87901474245),TRINITY_DN3656_c1_g1(-2.08721167236),TRINITY_DN3656_c1_g5(-3.02684114829),TRINITY_DN3688_c1_g7(-2.38640377363)	TRINITY_DN1551_c0_g1(-2.62773240149),TRINITY_DN1577_c0_g1(-1.27109622825),TRINITY_DN2618_c2_g3(1.16746035949),TRINITY_DN2830_c1_g6(-2.81950059698),TRINITY_DN3034_c3_g2(-2.78869539746),TRINITY_DN3285_c2_g1(-1.58640393684),TRINITY_DN3512_c0_g2(-1.87901474245),TRINITY_DN3656_c1_g1(-2.08721167236),TRINITY_DN3656_c1_g5(-3.02684114829),TRINITY_DN3688_c1_g7(-2.38640377363)
GO:0120031	plasma membrane bounded cell projection assembly	biological process	10/234	21/681	0.14358	1	TRINITY_DN109_c0_g1(-2.43108989434),TRINITY_DN1245_c0_g2(-3.43593361414),TRINITY_DN1551_c0_g1(-2.62773240149),TRINITY_DN2656_c0_g2(-4.58846026162),TRINITY_DN2990_c3_g1(4.48637222765),TRINITY_DN3032_c1_g3(-1.81290474391),TRINITY_DN311_c0_g1(-3.06936398231),TRINITY_DN3282_c0_g4(1.20593803666),TRINITY_DN3526_c2_g3(-3.28668474605),TRINITY_DN99_c0_g1(-1.6657118923)	TRINITY_DN109_c0_g1(-2.43108989434),TRINITY_DN1245_c0_g2(-3.43593361414),TRINITY_DN1551_c0_g1(-2.62773240149),TRINITY_DN2656_c0_g2(-4.58846026162),TRINITY_DN2990_c3_g1(4.48637222765),TRINITY_DN3032_c1_g3(-1.81290474391),TRINITY_DN311_c0_g1(-3.06936398231),TRINITY_DN3282_c0_g4(1.20593803666),TRINITY_DN3526_c2_g3(-3.28668474605),TRINITY_DN99_c0_g1(-1.6657118923)
GO:1902531	regulation of intracellular signal transduction	biological process	13/234	29/681	0.15547	1	TRINITY_DN1357_c0_g1(-2.55339730538),TRINITY_DN2512_c2_g5(-3.78741905927),TRINITY_DN2618_c2_g3(1.16746035949),TRINITY_DN2677_c1_g2(1.75084897723),TRINITY_DN2991_c1_g2(-1.38723740444),TRINITY_DN3130_c0_g1(-1.11371794823),TRINITY_DN3135_c2_g3(1.84163748525),TRINITY_DN3238_c1_g1(4.68706194956),TRINITY_DN3355_c2_g2(-1.83919966724),TRINITY_DN3512_c0_g2(-1.87901474245),TRINITY_DN3656_c1_g1(-2.087211672…	TRINITY_DN1357_c0_g1(-2.55339730538),TRINITY_DN2512_c2_g5(-3.78741905927),TRINITY_DN2618_c2_g3(1.16746035949),TRINITY_DN2677_c1_g2(1.75084897723),TRINITY_DN2991_c1_g2(-1.38723740444),TRINITY_DN3130_c0_g1(-1.11371794823),TRINITY_DN3135_c2_g3(1.84163748525),TRINITY_DN3238_c1_g1(4.68706194956),TRINITY_DN3355_c2_g2(-1.83919966724),TRINITY_DN3512_c0_g2(-1.87901474245),TRINITY_DN3656_c1_g1(-2.087211672…
GO:0009056	catabolic process	biological process	44/234	113/681	0.15548	1	TRINITY_DN1086_c0_g1(2.04510527931),TRINITY_DN1427_c0_g1(-2.09599714025),TRINITY_DN1445_c0_g1(-3.12136795106),TRINITY_DN1568_c0_g1(-1.33754060427),TRINITY_DN2301_c0_g1(2.37287805567),TRINITY_DN2481_c5_g1(-1.72793019786),TRINITY_DN2610_c4_g1(-1.54090835941),TRINITY_DN2670_c2_g6(-1.02619526061),TRINITY_DN2713_c2_g2(-1.10006926738),TRINITY_DN2713_c2_g4(-1.53848907314),TRINITY_DN2783_c0_g1(-2.2794169…	TRINITY_DN1086_c0_g1(2.04510527931),TRINITY_DN1427_c0_g1(-2.09599714025),TRINITY_DN1445_c0_g1(-3.12136795106),TRINITY_DN1568_c0_g1(-1.33754060427),TRINITY_DN2301_c0_g1(2.37287805567),TRINITY_DN2481_c5_g1(-1.72793019786),TRINITY_DN2610_c4_g1(-1.54090835941),TRINITY_DN2670_c2_g6(-1.02619526061),TRINITY_DN2713_c2_g2(-1.10006926738),TRINITY_DN2713_c2_g4(-1.53848907314),TRINITY_DN2783_c0_g1(-2.2794169…
GO:0000075	cell cycle checkpoint	biological process	5/234	9/681	0.15961	1	TRINITY_DN1577_c0_g1(-1.27109622825),TRINITY_DN3135_c2_g3(1.84163748525),TRINITY_DN3238_c1_g1(4.68706194956),TRINITY_DN3285_c2_g1(-1.58640393684),TRINITY_DN3355_c2_g2(-1.83919966724)	TRINITY_DN1577_c0_g1(-1.27109622825),TRINITY_DN3135_c2_g3(1.84163748525),TRINITY_DN3238_c1_g1(4.68706194956),TRINITY_DN3285_c2_g1(-1.58640393684),TRINITY_DN3355_c2_g2(-1.83919966724)
GO:0000122	negative regulation of transcription by RNA polymerase II	biological process	5/234	9/681	0.15961	1	TRINITY_DN2618_c2_g3(1.16746035949),TRINITY_DN3034_c4_g1(-2.34785465768),TRINITY_DN3512_c0_g2(-1.87901474245),TRINITY_DN3656_c1_g1(-2.08721167236),TRINITY_DN3656_c1_g5(-3.02684114829)	TRINITY_DN2618_c2_g3(1.16746035949),TRINITY_DN3034_c4_g1(-2.34785465768),TRINITY_DN3512_c0_g2(-1.87901474245),TRINITY_DN3656_c1_g1(-2.08721167236),TRINITY_DN3656_c1_g5(-3.02684114829)
GO:0001508	action potential	biological process	5/234	9/681	0.15961	1	TRINITY_DN1357_c0_g1(-2.55339730538),TRINITY_DN2677_c1_g2(1.75084897723),TRINITY_DN2991_c1_g2(-1.38723740444),TRINITY_DN3130_c0_g1(-1.11371794823),TRINITY_DN3757_c3_g4(2.45866702157)	TRINITY_DN1357_c0_g1(-2.55339730538),TRINITY_DN2677_c1_g2(1.75084897723),TRINITY_DN2991_c1_g2(-1.38723740444),TRINITY_DN3130_c0_g1(-1.11371794823),TRINITY_DN3757_c3_g4(2.45866702157)
GO:0007034	vacuolar transport	biological process	5/234	9/681	0.15961	1	TRINITY_DN2829_c3_g4(-2.33743191627),TRINITY_DN2948_c3_g2(-1.25152991183),TRINITY_DN3118_c6_g1(-2.15189148233),TRINITY_DN3344_c2_g2(-1.07984282302),TRINITY_DN3416_c0_g3(-1.06697066005)	TRINITY_DN2829_c3_g4(-2.33743191627),TRINITY_DN2948_c3_g2(-1.25152991183),TRINITY_DN3118_c6_g1(-2.15189148233),TRINITY_DN3344_c2_g2(-1.07984282302),TRINITY_DN3416_c0_g3(-1.06697066005)
GO:0007093	mitotic cell cycle checkpoint	biological process	5/234	9/681	0.15961	1	TRINITY_DN1577_c0_g1(-1.27109622825),TRINITY_DN3135_c2_g3(1.84163748525),TRINITY_DN3238_c1_g1(4.68706194956),TRINITY_DN3285_c2_g1(-1.58640393684),TRINITY_DN3355_c2_g2(-1.83919966724)	TRINITY_DN1577_c0_g1(-1.27109622825),TRINITY_DN3135_c2_g3(1.84163748525),TRINITY_DN3238_c1_g1(4.68706194956),TRINITY_DN3285_c2_g1(-1.58640393684),TRINITY_DN3355_c2_g2(-1.83919966724)
GO:0009658	chloroplast organization	biological process	5/234	9/681	0.15961	1	TRINITY_DN1349_c0_g1(1.13858735078),TRINITY_DN1762_c0_g1(1.27810707468),TRINITY_DN2604_c2_g2(-1.40351045286),TRINITY_DN3081_c0_g1(1.24454299096),TRINITY_DN3463_c3_g2(1.40977209201)	TRINITY_DN1349_c0_g1(1.13858735078),TRINITY_DN1762_c0_g1(1.27810707468),TRINITY_DN2604_c2_g2(-1.40351045286),TRINITY_DN3081_c0_g1(1.24454299096),TRINITY_DN3463_c3_g2(1.40977209201)
GO:0010737	protein kinase A signaling	biological process	5/234	9/681	0.15961	1	TRINITY_DN1357_c0_g1(-2.55339730538),TRINITY_DN2677_c1_g2(1.75084897723),TRINITY_DN2991_c1_g2(-1.38723740444),TRINITY_DN3130_c0_g1(-1.11371794823),TRINITY_DN3757_c3_g4(2.45866702157)	TRINITY_DN1357_c0_g1(-2.55339730538),TRINITY_DN2677_c1_g2(1.75084897723),TRINITY_DN2991_c1_g2(-1.38723740444),TRINITY_DN3130_c0_g1(-1.11371794823),TRINITY_DN3757_c3_g4(2.45866702157)
GO:0010738	regulation of protein kinase A signaling	biological process	5/234	9/681	0.15961	1	TRINITY_DN1357_c0_g1(-2.55339730538),TRINITY_DN2677_c1_g2(1.75084897723),TRINITY_DN2991_c1_g2(-1.38723740444),TRINITY_DN3130_c0_g1(-1.11371794823),TRINITY_DN3757_c3_g4(2.45866702157)	TRINITY_DN1357_c0_g1(-2.55339730538),TRINITY_DN2677_c1_g2(1.75084897723),TRINITY_DN2991_c1_g2(-1.38723740444),TRINITY_DN3130_c0_g1(-1.11371794823),TRINITY_DN3757_c3_g4(2.45866702157)
GO:0032411	positive regulation of transporter activity	biological process	5/234	9/681	0.15961	1	TRINITY_DN1357_c0_g1(-2.55339730538),TRINITY_DN2677_c1_g2(1.75084897723),TRINITY_DN2991_c1_g2(-1.38723740444),TRINITY_DN3130_c0_g1(-1.11371794823),TRINITY_DN3757_c3_g4(2.45866702157)	TRINITY_DN1357_c0_g1(-2.55339730538),TRINITY_DN2677_c1_g2(1.75084897723),TRINITY_DN2991_c1_g2(-1.38723740444),TRINITY_DN3130_c0_g1(-1.11371794823),TRINITY_DN3757_c3_g4(2.45866702157)
GO:0032414	positive regulation of ion transmembrane transporter activity	biological process	5/234	9/681	0.15961	1	TRINITY_DN1357_c0_g1(-2.55339730538),TRINITY_DN2677_c1_g2(1.75084897723),TRINITY_DN2991_c1_g2(-1.38723740444),TRINITY_DN3130_c0_g1(-1.11371794823),TRINITY_DN3757_c3_g4(2.45866702157)	TRINITY_DN1357_c0_g1(-2.55339730538),TRINITY_DN2677_c1_g2(1.75084897723),TRINITY_DN2991_c1_g2(-1.38723740444),TRINITY_DN3130_c0_g1(-1.11371794823),TRINITY_DN3757_c3_g4(2.45866702157)
GO:0032506	cytokinetic process	biological process	5/234	9/681	0.15961	1	TRINITY_DN2594_c2_g3(-1.36851091336),TRINITY_DN2639_c3_g4(-1.71335820389),TRINITY_DN2786_c2_g4(-1.88079518437),TRINITY_DN3034_c3_g2(-2.78869539746),TRINITY_DN3580_c0_g1(-1.66708596092)	TRINITY_DN2594_c2_g3(-1.36851091336),TRINITY_DN2639_c3_g4(-1.71335820389),TRINITY_DN2786_c2_g4(-1.88079518437),TRINITY_DN3034_c3_g2(-2.78869539746),TRINITY_DN3580_c0_g1(-1.66708596092)
GO:0043268	positive regulation of potassium ion transport	biological process	5/234	9/681	0.15961	1	TRINITY_DN1357_c0_g1(-2.55339730538),TRINITY_DN2677_c1_g2(1.75084897723),TRINITY_DN2991_c1_g2(-1.38723740444),TRINITY_DN3130_c0_g1(-1.11371794823),TRINITY_DN3757_c3_g4(2.45866702157)	TRINITY_DN1357_c0_g1(-2.55339730538),TRINITY_DN2677_c1_g2(1.75084897723),TRINITY_DN2991_c1_g2(-1.38723740444),TRINITY_DN3130_c0_g1(-1.11371794823),TRINITY_DN3757_c3_g4(2.45866702157)
GO:0051302	regulation of cell division	biological process	5/234	9/681	0.15961	1	TRINITY_DN2244_c0_g1(-2.14833104305),TRINITY_DN2670_c0_g1(-1.16807489944),TRINITY_DN2830_c1_g6(-2.81950059698),TRINITY_DN3034_c3_g2(-2.78869539746),TRINITY_DN3688_c1_g7(-2.38640377363)	TRINITY_DN2244_c0_g1(-2.14833104305),TRINITY_DN2670_c0_g1(-1.16807489944),TRINITY_DN2830_c1_g6(-2.81950059698),TRINITY_DN3034_c3_g2(-2.78869539746),TRINITY_DN3688_c1_g7(-2.38640377363)
GO:0060306	regulation of membrane repolarization	biological process	5/234	9/681	0.15961	1	TRINITY_DN1357_c0_g1(-2.55339730538),TRINITY_DN2677_c1_g2(1.75084897723),TRINITY_DN2991_c1_g2(-1.38723740444),TRINITY_DN3130_c0_g1(-1.11371794823),TRINITY_DN3757_c3_g4(2.45866702157)	TRINITY_DN1357_c0_g1(-2.55339730538),TRINITY_DN2677_c1_g2(1.75084897723),TRINITY_DN2991_c1_g2(-1.38723740444),TRINITY_DN3130_c0_g1(-1.11371794823),TRINITY_DN3757_c3_g4(2.45866702157)
GO:0071320	cellular response to cAMP	biological process	5/234	9/681	0.15961	1	TRINITY_DN1357_c0_g1(-2.55339730538),TRINITY_DN2677_c1_g2(1.75084897723),TRINITY_DN2991_c1_g2(-1.38723740444),TRINITY_DN3130_c0_g1(-1.11371794823),TRINITY_DN3757_c3_g4(2.45866702157)	TRINITY_DN1357_c0_g1(-2.55339730538),TRINITY_DN2677_c1_g2(1.75084897723),TRINITY_DN2991_c1_g2(-1.38723740444),TRINITY_DN3130_c0_g1(-1.11371794823),TRINITY_DN3757_c3_g4(2.45866702157)
GO:0071478	cellular response to radiation	biological process	5/234	9/681	0.15961	1	TRINITY_DN3135_c2_g3(1.84163748525),TRINITY_DN3238_c1_g1(4.68706194956),TRINITY_DN3311_c1_g2(-1.13281740221),TRINITY_DN3355_c2_g2(-1.83919966724),TRINITY_DN3368_c3_g4(-1.07708134491)	TRINITY_DN3135_c2_g3(1.84163748525),TRINITY_DN3238_c1_g1(4.68706194956),TRINITY_DN3311_c1_g2(-1.13281740221),TRINITY_DN3355_c2_g2(-1.83919966724),TRINITY_DN3368_c3_g4(-1.07708134491)
GO:0086009	membrane repolarization	biological process	5/234	9/681	0.15961	1	TRINITY_DN1357_c0_g1(-2.55339730538),TRINITY_DN2677_c1_g2(1.75084897723),TRINITY_DN2991_c1_g2(-1.38723740444),TRINITY_DN3130_c0_g1(-1.11371794823),TRINITY_DN3757_c3_g4(2.45866702157)	TRINITY_DN1357_c0_g1(-2.55339730538),TRINITY_DN2677_c1_g2(1.75084897723),TRINITY_DN2991_c1_g2(-1.38723740444),TRINITY_DN3130_c0_g1(-1.11371794823),TRINITY_DN3757_c3_g4(2.45866702157)
GO:1901018	positive regulation of potassium ion transmembrane transporter activity	biological process	5/234	9/681	0.15961	1	TRINITY_DN1357_c0_g1(-2.55339730538),TRINITY_DN2677_c1_g2(1.75084897723),TRINITY_DN2991_c1_g2(-1.38723740444),TRINITY_DN3130_c0_g1(-1.11371794823),TRINITY_DN3757_c3_g4(2.45866702157)	TRINITY_DN1357_c0_g1(-2.55339730538),TRINITY_DN2677_c1_g2(1.75084897723),TRINITY_DN2991_c1_g2(-1.38723740444),TRINITY_DN3130_c0_g1(-1.11371794823),TRINITY_DN3757_c3_g4(2.45866702157)
GO:1901381	positive regulation of potassium ion transmembrane transport	biological process	5/234	9/681	0.15961	1	TRINITY_DN1357_c0_g1(-2.55339730538),TRINITY_DN2677_c1_g2(1.75084897723),TRINITY_DN2991_c1_g2(-1.38723740444),TRINITY_DN3130_c0_g1(-1.11371794823),TRINITY_DN3757_c3_g4(2.45866702157)	TRINITY_DN1357_c0_g1(-2.55339730538),TRINITY_DN2677_c1_g2(1.75084897723),TRINITY_DN2991_c1_g2(-1.38723740444),TRINITY_DN3130_c0_g1(-1.11371794823),TRINITY_DN3757_c3_g4(2.45866702157)
GO:1902259	regulation of delayed rectifier potassium channel activity	biological process	5/234	9/681	0.15961	1	TRINITY_DN1357_c0_g1(-2.55339730538),TRINITY_DN2677_c1_g2(1.75084897723),TRINITY_DN2991_c1_g2(-1.38723740444),TRINITY_DN3130_c0_g1(-1.11371794823),TRINITY_DN3757_c3_g4(2.45866702157)	TRINITY_DN1357_c0_g1(-2.55339730538),TRINITY_DN2677_c1_g2(1.75084897723),TRINITY_DN2991_c1_g2(-1.38723740444),TRINITY_DN3130_c0_g1(-1.11371794823),TRINITY_DN3757_c3_g4(2.45866702157)
GO:1902261	positive regulation of delayed rectifier potassium channel activity	biological process	5/234	9/681	0.15961	1	TRINITY_DN1357_c0_g1(-2.55339730538),TRINITY_DN2677_c1_g2(1.75084897723),TRINITY_DN2991_c1_g2(-1.38723740444),TRINITY_DN3130_c0_g1(-1.11371794823),TRINITY_DN3757_c3_g4(2.45866702157)	TRINITY_DN1357_c0_g1(-2.55339730538),TRINITY_DN2677_c1_g2(1.75084897723),TRINITY_DN2991_c1_g2(-1.38723740444),TRINITY_DN3130_c0_g1(-1.11371794823),TRINITY_DN3757_c3_g4(2.45866702157)
GO:1903818	positive regulation of voltage-gated potassium channel activity	biological process	5/234	9/681	0.15961	1	TRINITY_DN1357_c0_g1(-2.55339730538),TRINITY_DN2677_c1_g2(1.75084897723),TRINITY_DN2991_c1_g2(-1.38723740444),TRINITY_DN3130_c0_g1(-1.11371794823),TRINITY_DN3757_c3_g4(2.45866702157)	TRINITY_DN1357_c0_g1(-2.55339730538),TRINITY_DN2677_c1_g2(1.75084897723),TRINITY_DN2991_c1_g2(-1.38723740444),TRINITY_DN3130_c0_g1(-1.11371794823),TRINITY_DN3757_c3_g4(2.45866702157)
GO:2001259	positive regulation of cation channel activity	biological process	5/234	9/681	0.15961	1	TRINITY_DN1357_c0_g1(-2.55339730538),TRINITY_DN2677_c1_g2(1.75084897723),TRINITY_DN2991_c1_g2(-1.38723740444),TRINITY_DN3130_c0_g1(-1.11371794823),TRINITY_DN3757_c3_g4(2.45866702157)	TRINITY_DN1357_c0_g1(-2.55339730538),TRINITY_DN2677_c1_g2(1.75084897723),TRINITY_DN2991_c1_g2(-1.38723740444),TRINITY_DN3130_c0_g1(-1.11371794823),TRINITY_DN3757_c3_g4(2.45866702157)
GO:0000226	microtubule cytoskeleton organization	biological process	11/234	24/681	0.16178	1	TRINITY_DN109_c0_g1(-2.43108989434),TRINITY_DN1245_c0_g2(-3.43593361414),TRINITY_DN1551_c0_g1(-2.62773240149),TRINITY_DN2656_c0_g2(-4.58846026162),TRINITY_DN2881_c4_g1(-2.13230653776),TRINITY_DN311_c0_g1(-3.06936398231),TRINITY_DN3282_c0_g4(1.20593803666),TRINITY_DN3368_c3_g3(-1.35865189413),TRINITY_DN3495_c0_g2(-1.90844140963),TRINITY_DN3526_c2_g3(-3.28668474605),TRINITY_DN99_c0_g1(-1.6657118923)	TRINITY_DN109_c0_g1(-2.43108989434),TRINITY_DN1245_c0_g2(-3.43593361414),TRINITY_DN1551_c0_g1(-2.62773240149),TRINITY_DN2656_c0_g2(-4.58846026162),TRINITY_DN2881_c4_g1(-2.13230653776),TRINITY_DN311_c0_g1(-3.06936398231),TRINITY_DN3282_c0_g4(1.20593803666),TRINITY_DN3368_c3_g3(-1.35865189413),TRINITY_DN3495_c0_g2(-1.90844140963),TRINITY_DN3526_c2_g3(-3.28668474605),TRINITY_DN99_c0_g1(-1.6657118923)
GO:0030001	metal ion transport	biological process	11/234	24/681	0.16178	1	TRINITY_DN1357_c0_g1(-2.55339730538),TRINITY_DN1903_c0_g1(-1.0299931519),TRINITY_DN2677_c1_g2(1.75084897723),TRINITY_DN2991_c1_g2(-1.38723740444),TRINITY_DN3032_c1_g3(-1.81290474391),TRINITY_DN3130_c0_g1(-1.11371794823),TRINITY_DN3141_c1_g4(-1.27569617362),TRINITY_DN3324_c1_g1(-1.19910771168),TRINITY_DN3455_c5_g4(-1.38140557462),TRINITY_DN3600_c1_g3(3.14748655044),TRINITY_DN3757_c3_g4(2.458667021…	TRINITY_DN1357_c0_g1(-2.55339730538),TRINITY_DN1903_c0_g1(-1.0299931519),TRINITY_DN2677_c1_g2(1.75084897723),TRINITY_DN2991_c1_g2(-1.38723740444),TRINITY_DN3032_c1_g3(-1.81290474391),TRINITY_DN3130_c0_g1(-1.11371794823),TRINITY_DN3141_c1_g4(-1.27569617362),TRINITY_DN3324_c1_g1(-1.19910771168),TRINITY_DN3455_c5_g4(-1.38140557462),TRINITY_DN3600_c1_g3(3.14748655044),TRINITY_DN3757_c3_g4(2.458667021…
GO:0006813	potassium ion transport	biological process	7/234	14/681	0.16768	1	TRINITY_DN1357_c0_g1(-2.55339730538),TRINITY_DN1903_c0_g1(-1.0299931519),TRINITY_DN2677_c1_g2(1.75084897723),TRINITY_DN2991_c1_g2(-1.38723740444),TRINITY_DN3130_c0_g1(-1.11371794823),TRINITY_DN3324_c1_g1(-1.19910771168),TRINITY_DN3757_c3_g4(2.45866702157)	TRINITY_DN1357_c0_g1(-2.55339730538),TRINITY_DN1903_c0_g1(-1.0299931519),TRINITY_DN2677_c1_g2(1.75084897723),TRINITY_DN2991_c1_g2(-1.38723740444),TRINITY_DN3130_c0_g1(-1.11371794823),TRINITY_DN3324_c1_g1(-1.19910771168),TRINITY_DN3757_c3_g4(2.45866702157)
GO:0007281	germ cell development	biological process	7/234	14/681	0.16768	1	TRINITY_DN1577_c0_g1(-1.27109622825),TRINITY_DN2948_c3_g2(-1.25152991183),TRINITY_DN2990_c3_g1(4.48637222765),TRINITY_DN3282_c0_g4(1.20593803666),TRINITY_DN3344_c2_g2(-1.07984282302),TRINITY_DN3416_c0_g3(-1.06697066005),TRINITY_DN3602_c4_g2(-2.95532582631)	TRINITY_DN1577_c0_g1(-1.27109622825),TRINITY_DN2948_c3_g2(-1.25152991183),TRINITY_DN2990_c3_g1(4.48637222765),TRINITY_DN3282_c0_g4(1.20593803666),TRINITY_DN3344_c2_g2(-1.07984282302),TRINITY_DN3416_c0_g3(-1.06697066005),TRINITY_DN3602_c4_g2(-2.95532582631)
GO:0015698	inorganic anion transport	biological process	7/234	14/681	0.16768	1	TRINITY_DN1269_c0_g1(-2.69702190868),TRINITY_DN2823_c2_g4(-1.13639408501),TRINITY_DN2981_c1_g1(-1.28653934136),TRINITY_DN3217_c0_g1(-4.26414724998),TRINITY_DN3217_c0_g2(-14.4886184371),TRINITY_DN3572_c0_g1(2.50846379256),TRINITY_DN3572_c0_g4(-1.01046578553)	TRINITY_DN1269_c0_g1(-2.69702190868),TRINITY_DN2823_c2_g4(-1.13639408501),TRINITY_DN2981_c1_g1(-1.28653934136),TRINITY_DN3217_c0_g1(-4.26414724998),TRINITY_DN3217_c0_g2(-14.4886184371),TRINITY_DN3572_c0_g1(2.50846379256),TRINITY_DN3572_c0_g4(-1.01046578553)
GO:0046677	response to antibiotic	biological process	7/234	14/681	0.16768	1	TRINITY_DN1383_c0_g2(-5.09453204951),TRINITY_DN3324_c1_g1(-1.19910771168),TRINITY_DN3436_c0_g2(-1.03382554582),TRINITY_DN3502_c0_g1(-1.23001299537),TRINITY_DN3600_c1_g3(3.14748655044),TRINITY_DN3627_c0_g3(-1.19857734941),TRINITY_DN3704_c2_g2(-1.53812790792)	TRINITY_DN1383_c0_g2(-5.09453204951),TRINITY_DN3324_c1_g1(-1.19910771168),TRINITY_DN3436_c0_g2(-1.03382554582),TRINITY_DN3502_c0_g1(-1.23001299537),TRINITY_DN3600_c1_g3(3.14748655044),TRINITY_DN3627_c0_g3(-1.19857734941),TRINITY_DN3704_c2_g2(-1.53812790792)
GO:0048598	embryonic morphogenesis	biological process	7/234	14/681	0.16768	1	TRINITY_DN1551_c0_g1(-2.62773240149),TRINITY_DN2244_c0_g1(-2.14833104305),TRINITY_DN2670_c0_g1(-1.16807489944),TRINITY_DN2990_c3_g1(4.48637222765),TRINITY_DN3135_c2_g3(1.84163748525),TRINITY_DN3238_c1_g1(4.68706194956),TRINITY_DN3355_c2_g2(-1.83919966724)	TRINITY_DN1551_c0_g1(-2.62773240149),TRINITY_DN2244_c0_g1(-2.14833104305),TRINITY_DN2670_c0_g1(-1.16807489944),TRINITY_DN2990_c3_g1(4.48637222765),TRINITY_DN3135_c2_g3(1.84163748525),TRINITY_DN3238_c1_g1(4.68706194956),TRINITY_DN3355_c2_g2(-1.83919966724)
GO:0050832	defense response to fungus	biological process	7/234	14/681	0.16768	1	TRINITY_DN1383_c0_g2(-5.09453204951),TRINITY_DN2506_c1_g2(2.69390264406),TRINITY_DN2670_c2_g6(-1.02619526061),TRINITY_DN2727_c2_g2(2.80700894859),TRINITY_DN3324_c1_g1(-1.19910771168),TRINITY_DN3436_c0_g2(-1.03382554582),TRINITY_DN3722_c1_g7(-2.33487818804)	TRINITY_DN1383_c0_g2(-5.09453204951),TRINITY_DN2506_c1_g2(2.69390264406),TRINITY_DN2670_c2_g6(-1.02619526061),TRINITY_DN2727_c2_g2(2.80700894859),TRINITY_DN3324_c1_g1(-1.19910771168),TRINITY_DN3436_c0_g2(-1.03382554582),TRINITY_DN3722_c1_g7(-2.33487818804)
GO:0060249	anatomical structure homeostasis	biological process	7/234	14/681	0.16768	1	TRINITY_DN1268_c0_g1(-2.06811775799),TRINITY_DN1551_c0_g1(-2.62773240149),TRINITY_DN2990_c3_g1(4.48637222765),TRINITY_DN3160_c3_g6(1.13017127252),TRINITY_DN3311_c1_g2(-1.13281740221),TRINITY_DN3569_c7_g1(-1.71456957864),TRINITY_DN3593_c3_g1(-1.127844984)	TRINITY_DN1268_c0_g1(-2.06811775799),TRINITY_DN1551_c0_g1(-2.62773240149),TRINITY_DN2990_c3_g1(4.48637222765),TRINITY_DN3160_c3_g6(1.13017127252),TRINITY_DN3311_c1_g2(-1.13281740221),TRINITY_DN3569_c7_g1(-1.71456957864),TRINITY_DN3593_c3_g1(-1.127844984)
GO:0071804	cellular potassium ion transport	biological process	7/234	14/681	0.16768	1	TRINITY_DN1357_c0_g1(-2.55339730538),TRINITY_DN1903_c0_g1(-1.0299931519),TRINITY_DN2677_c1_g2(1.75084897723),TRINITY_DN2991_c1_g2(-1.38723740444),TRINITY_DN3130_c0_g1(-1.11371794823),TRINITY_DN3324_c1_g1(-1.19910771168),TRINITY_DN3757_c3_g4(2.45866702157)	TRINITY_DN1357_c0_g1(-2.55339730538),TRINITY_DN1903_c0_g1(-1.0299931519),TRINITY_DN2677_c1_g2(1.75084897723),TRINITY_DN2991_c1_g2(-1.38723740444),TRINITY_DN3130_c0_g1(-1.11371794823),TRINITY_DN3324_c1_g1(-1.19910771168),TRINITY_DN3757_c3_g4(2.45866702157)
GO:0071805	potassium ion transmembrane transport	biological process	7/234	14/681	0.16768	1	TRINITY_DN1357_c0_g1(-2.55339730538),TRINITY_DN1903_c0_g1(-1.0299931519),TRINITY_DN2677_c1_g2(1.75084897723),TRINITY_DN2991_c1_g2(-1.38723740444),TRINITY_DN3130_c0_g1(-1.11371794823),TRINITY_DN3324_c1_g1(-1.19910771168),TRINITY_DN3757_c3_g4(2.45866702157)	TRINITY_DN1357_c0_g1(-2.55339730538),TRINITY_DN1903_c0_g1(-1.0299931519),TRINITY_DN2677_c1_g2(1.75084897723),TRINITY_DN2991_c1_g2(-1.38723740444),TRINITY_DN3130_c0_g1(-1.11371794823),TRINITY_DN3324_c1_g1(-1.19910771168),TRINITY_DN3757_c3_g4(2.45866702157)
GO:0006974	cellular response to DNA damage stimulus	biological process	15/234	35/681	0.18219	1	TRINITY_DN1268_c0_g1(-2.06811775799),TRINITY_DN1577_c0_g1(-1.27109622825),TRINITY_DN1914_c0_g1(-1.41718553061),TRINITY_DN2576_c0_g2(-1.04508082347),TRINITY_DN2834_c2_g1(-1.88177373969),TRINITY_DN2894_c1_g4(-1.13651404581),TRINITY_DN3003_c0_g1(-1.38606041139),TRINITY_DN3135_c2_g3(1.84163748525),TRINITY_DN3238_c1_g1(4.68706194956),TRINITY_DN3285_c2_g1(-1.58640393684),TRINITY_DN3311_c1_g2(-1.1328174…	TRINITY_DN1268_c0_g1(-2.06811775799),TRINITY_DN1577_c0_g1(-1.27109622825),TRINITY_DN1914_c0_g1(-1.41718553061),TRINITY_DN2576_c0_g2(-1.04508082347),TRINITY_DN2834_c2_g1(-1.88177373969),TRINITY_DN2894_c1_g4(-1.13651404581),TRINITY_DN3003_c0_g1(-1.38606041139),TRINITY_DN3135_c2_g3(1.84163748525),TRINITY_DN3238_c1_g1(4.68706194956),TRINITY_DN3285_c2_g1(-1.58640393684),TRINITY_DN3311_c1_g2(-1.1328174…
GO:0042493	response to drug	biological process	15/234	35/681	0.18219	1	TRINITY_DN1383_c0_g2(-5.09453204951),TRINITY_DN2618_c2_g3(1.16746035949),TRINITY_DN2854_c3_g4(-1.03193046162),TRINITY_DN3324_c1_g1(-1.19910771168),TRINITY_DN3343_c1_g7(1.11505558557),TRINITY_DN3436_c0_g2(-1.03382554582),TRINITY_DN3455_c5_g4(-1.38140557462),TRINITY_DN3502_c0_g1(-1.23001299537),TRINITY_DN3512_c0_g2(-1.87901474245),TRINITY_DN3600_c1_g3(3.14748655044),TRINITY_DN3627_c0_g3(-1.19857734…	TRINITY_DN1383_c0_g2(-5.09453204951),TRINITY_DN2618_c2_g3(1.16746035949),TRINITY_DN2854_c3_g4(-1.03193046162),TRINITY_DN3324_c1_g1(-1.19910771168),TRINITY_DN3343_c1_g7(1.11505558557),TRINITY_DN3436_c0_g2(-1.03382554582),TRINITY_DN3455_c5_g4(-1.38140557462),TRINITY_DN3502_c0_g1(-1.23001299537),TRINITY_DN3512_c0_g2(-1.87901474245),TRINITY_DN3600_c1_g3(3.14748655044),TRINITY_DN3627_c0_g3(-1.19857734…
GO:0051301	cell division	biological process	15/234	35/681	0.18219	1	TRINITY_DN2244_c0_g1(-2.14833104305),TRINITY_DN2594_c2_g3(-1.36851091336),TRINITY_DN2618_c2_g3(1.16746035949),TRINITY_DN2639_c3_g4(-1.71335820389),TRINITY_DN2670_c0_g1(-1.16807489944),TRINITY_DN2786_c2_g4(-1.88079518437),TRINITY_DN2830_c1_g6(-2.81950059698),TRINITY_DN2990_c3_g1(4.48637222765),TRINITY_DN3034_c3_g2(-2.78869539746),TRINITY_DN3496_c4_g3(-1.18941672544),TRINITY_DN3512_c0_g2(-1.8790147…	TRINITY_DN2244_c0_g1(-2.14833104305),TRINITY_DN2594_c2_g3(-1.36851091336),TRINITY_DN2618_c2_g3(1.16746035949),TRINITY_DN2639_c3_g4(-1.71335820389),TRINITY_DN2670_c0_g1(-1.16807489944),TRINITY_DN2786_c2_g4(-1.88079518437),TRINITY_DN2830_c1_g6(-2.81950059698),TRINITY_DN2990_c3_g1(4.48637222765),TRINITY_DN3034_c3_g2(-2.78869539746),TRINITY_DN3496_c4_g3(-1.18941672544),TRINITY_DN3512_c0_g2(-1.8790147…
GO:0006952	defense response	biological process	18/234	43/681	0.18229	1	TRINITY_DN1383_c0_g2(-5.09453204951),TRINITY_DN1453_c0_g1(-2.82693098456),TRINITY_DN2506_c1_g2(2.69390264406),TRINITY_DN2522_c0_g1(1.71353669634),TRINITY_DN2638_c4_g1(-1.94308971346),TRINITY_DN2638_c4_g3(-1.69613457802),TRINITY_DN2670_c2_g4(-1.43011048969),TRINITY_DN2670_c2_g6(-1.02619526061),TRINITY_DN2727_c2_g2(2.80700894859),TRINITY_DN2863_c0_g2(-1.17670982061),TRINITY_DN3002_c7_g4(-1.40332126…	TRINITY_DN1383_c0_g2(-5.09453204951),TRINITY_DN1453_c0_g1(-2.82693098456),TRINITY_DN2506_c1_g2(2.69390264406),TRINITY_DN2522_c0_g1(1.71353669634),TRINITY_DN2638_c4_g1(-1.94308971346),TRINITY_DN2638_c4_g3(-1.69613457802),TRINITY_DN2670_c2_g4(-1.43011048969),TRINITY_DN2670_c2_g6(-1.02619526061),TRINITY_DN2727_c2_g2(2.80700894859),TRINITY_DN2863_c0_g2(-1.17670982061),TRINITY_DN3002_c7_g4(-1.40332126…
GO:0035556	intracellular signal transduction	biological process	18/234	43/681	0.18229	1	TRINITY_DN1357_c0_g1(-2.55339730538),TRINITY_DN2512_c2_g5(-3.78741905927),TRINITY_DN2618_c2_g3(1.16746035949),TRINITY_DN2677_c1_g2(1.75084897723),TRINITY_DN2990_c3_g1(4.48637222765),TRINITY_DN2991_c1_g2(-1.38723740444),TRINITY_DN3032_c1_g3(-1.81290474391),TRINITY_DN3130_c0_g1(-1.11371794823),TRINITY_DN3135_c2_g3(1.84163748525),TRINITY_DN3238_c1_g1(4.68706194956),TRINITY_DN3285_c2_g1(-1.5864039368…	TRINITY_DN1357_c0_g1(-2.55339730538),TRINITY_DN2512_c2_g5(-3.78741905927),TRINITY_DN2618_c2_g3(1.16746035949),TRINITY_DN2677_c1_g2(1.75084897723),TRINITY_DN2990_c3_g1(4.48637222765),TRINITY_DN2991_c1_g2(-1.38723740444),TRINITY_DN3032_c1_g3(-1.81290474391),TRINITY_DN3130_c0_g1(-1.11371794823),TRINITY_DN3135_c2_g3(1.84163748525),TRINITY_DN3238_c1_g1(4.68706194956),TRINITY_DN3285_c2_g1(-1.5864039368…
GO:0098660	inorganic ion transmembrane transport	biological process	18/234	43/681	0.18229	1	TRINITY_DN1357_c0_g1(-2.55339730538),TRINITY_DN1903_c0_g1(-1.0299931519),TRINITY_DN2539_c0_g1(-1.81563107104),TRINITY_DN2677_c1_g2(1.75084897723),TRINITY_DN2823_c2_g4(-1.13639408501),TRINITY_DN2991_c1_g2(-1.38723740444),TRINITY_DN3032_c1_g3(-1.81290474391),TRINITY_DN3130_c0_g1(-1.11371794823),TRINITY_DN3152_c0_g2(1.64967134113),TRINITY_DN3217_c0_g1(-4.26414724998),TRINITY_DN3217_c0_g2(-14.4886184…	TRINITY_DN1357_c0_g1(-2.55339730538),TRINITY_DN1903_c0_g1(-1.0299931519),TRINITY_DN2539_c0_g1(-1.81563107104),TRINITY_DN2677_c1_g2(1.75084897723),TRINITY_DN2823_c2_g4(-1.13639408501),TRINITY_DN2991_c1_g2(-1.38723740444),TRINITY_DN3032_c1_g3(-1.81290474391),TRINITY_DN3130_c0_g1(-1.11371794823),TRINITY_DN3152_c0_g2(1.64967134113),TRINITY_DN3217_c0_g1(-4.26414724998),TRINITY_DN3217_c0_g2(-14.4886184…
GO:0030031	cell projection assembly	biological process	10/234	22/681	0.18667	1	TRINITY_DN109_c0_g1(-2.43108989434),TRINITY_DN1245_c0_g2(-3.43593361414),TRINITY_DN1551_c0_g1(-2.62773240149),TRINITY_DN2656_c0_g2(-4.58846026162),TRINITY_DN2990_c3_g1(4.48637222765),TRINITY_DN3032_c1_g3(-1.81290474391),TRINITY_DN311_c0_g1(-3.06936398231),TRINITY_DN3282_c0_g4(1.20593803666),TRINITY_DN3526_c2_g3(-3.28668474605),TRINITY_DN99_c0_g1(-1.6657118923)	TRINITY_DN109_c0_g1(-2.43108989434),TRINITY_DN1245_c0_g2(-3.43593361414),TRINITY_DN1551_c0_g1(-2.62773240149),TRINITY_DN2656_c0_g2(-4.58846026162),TRINITY_DN2990_c3_g1(4.48637222765),TRINITY_DN3032_c1_g3(-1.81290474391),TRINITY_DN311_c0_g1(-3.06936398231),TRINITY_DN3282_c0_g4(1.20593803666),TRINITY_DN3526_c2_g3(-3.28668474605),TRINITY_DN99_c0_g1(-1.6657118923)
GO:0032270	positive regulation of cellular protein metabolic process	biological process	10/234	22/681	0.18667	1	TRINITY_DN1551_c0_g1(-2.62773240149),TRINITY_DN2618_c2_g3(1.16746035949),TRINITY_DN2830_c1_g6(-2.81950059698),TRINITY_DN3135_c2_g3(1.84163748525),TRINITY_DN3238_c1_g1(4.68706194956),TRINITY_DN3355_c2_g2(-1.83919966724),TRINITY_DN3512_c0_g2(-1.87901474245),TRINITY_DN3656_c1_g1(-2.08721167236),TRINITY_DN3656_c1_g5(-3.02684114829),TRINITY_DN3688_c1_g7(-2.38640377363)	TRINITY_DN1551_c0_g1(-2.62773240149),TRINITY_DN2618_c2_g3(1.16746035949),TRINITY_DN2830_c1_g6(-2.81950059698),TRINITY_DN3135_c2_g3(1.84163748525),TRINITY_DN3238_c1_g1(4.68706194956),TRINITY_DN3355_c2_g2(-1.83919966724),TRINITY_DN3512_c0_g2(-1.87901474245),TRINITY_DN3656_c1_g1(-2.08721167236),TRINITY_DN3656_c1_g5(-3.02684114829),TRINITY_DN3688_c1_g7(-2.38640377363)
GO:0048589	developmental growth	biological process	10/234	22/681	0.18667	1	TRINITY_DN1551_c0_g1(-2.62773240149),TRINITY_DN2767_c3_g3(-1.67248354228),TRINITY_DN2948_c3_g2(-1.25152991183),TRINITY_DN2990_c3_g1(4.48637222765),TRINITY_DN3034_c3_g2(-2.78869539746),TRINITY_DN3324_c1_g1(-1.19910771168),TRINITY_DN3344_c2_g2(-1.07984282302),TRINITY_DN3416_c0_g3(-1.06697066005),TRINITY_DN3496_c4_g3(-1.18941672544),TRINITY_DN3569_c7_g1(-1.71456957864)	TRINITY_DN1551_c0_g1(-2.62773240149),TRINITY_DN2767_c3_g3(-1.67248354228),TRINITY_DN2948_c3_g2(-1.25152991183),TRINITY_DN2990_c3_g1(4.48637222765),TRINITY_DN3034_c3_g2(-2.78869539746),TRINITY_DN3324_c1_g1(-1.19910771168),TRINITY_DN3344_c2_g2(-1.07984282302),TRINITY_DN3416_c0_g3(-1.06697066005),TRINITY_DN3496_c4_g3(-1.18941672544),TRINITY_DN3569_c7_g1(-1.71456957864)
GO:0051247	positive regulation of protein metabolic process	biological process	10/234	22/681	0.18667	1	TRINITY_DN1551_c0_g1(-2.62773240149),TRINITY_DN2618_c2_g3(1.16746035949),TRINITY_DN2830_c1_g6(-2.81950059698),TRINITY_DN3135_c2_g3(1.84163748525),TRINITY_DN3238_c1_g1(4.68706194956),TRINITY_DN3355_c2_g2(-1.83919966724),TRINITY_DN3512_c0_g2(-1.87901474245),TRINITY_DN3656_c1_g1(-2.08721167236),TRINITY_DN3656_c1_g5(-3.02684114829),TRINITY_DN3688_c1_g7(-2.38640377363)	TRINITY_DN1551_c0_g1(-2.62773240149),TRINITY_DN2618_c2_g3(1.16746035949),TRINITY_DN2830_c1_g6(-2.81950059698),TRINITY_DN3135_c2_g3(1.84163748525),TRINITY_DN3238_c1_g1(4.68706194956),TRINITY_DN3355_c2_g2(-1.83919966724),TRINITY_DN3512_c0_g2(-1.87901474245),TRINITY_DN3656_c1_g1(-2.08721167236),TRINITY_DN3656_c1_g5(-3.02684114829),TRINITY_DN3688_c1_g7(-2.38640377363)
GO:0000920	cell separation after cytokinesis	biological process	4/234	7/681	0.18834	1	TRINITY_DN2618_c2_g3(1.16746035949),TRINITY_DN3512_c0_g2(-1.87901474245),TRINITY_DN3656_c1_g1(-2.08721167236),TRINITY_DN3656_c1_g5(-3.02684114829)	TRINITY_DN2618_c2_g3(1.16746035949),TRINITY_DN3512_c0_g2(-1.87901474245),TRINITY_DN3656_c1_g1(-2.08721167236),TRINITY_DN3656_c1_g5(-3.02684114829)
GO:0001654	eye development	biological process	4/234	7/681	0.18834	1	TRINITY_DN2244_c0_g1(-2.14833104305),TRINITY_DN2670_c0_g1(-1.16807489944),TRINITY_DN2830_c1_g6(-2.81950059698),TRINITY_DN2990_c3_g1(4.48637222765)	TRINITY_DN2244_c0_g1(-2.14833104305),TRINITY_DN2670_c0_g1(-1.16807489944),TRINITY_DN2830_c1_g6(-2.81950059698),TRINITY_DN2990_c3_g1(4.48637222765)
GO:0007423	sensory organ development	biological process	4/234	7/681	0.18834	1	TRINITY_DN2244_c0_g1(-2.14833104305),TRINITY_DN2670_c0_g1(-1.16807489944),TRINITY_DN2830_c1_g6(-2.81950059698),TRINITY_DN2990_c3_g1(4.48637222765)	TRINITY_DN2244_c0_g1(-2.14833104305),TRINITY_DN2670_c0_g1(-1.16807489944),TRINITY_DN2830_c1_g6(-2.81950059698),TRINITY_DN2990_c3_g1(4.48637222765)
GO:0009814	defense response, incompatible interaction	biological process	4/234	7/681	0.18834	1	TRINITY_DN2506_c1_g2(2.69390264406),TRINITY_DN2670_c2_g4(-1.43011048969),TRINITY_DN2727_c2_g2(2.80700894859),TRINITY_DN3667_c3_g3(-1.03216184042)	TRINITY_DN2506_c1_g2(2.69390264406),TRINITY_DN2670_c2_g4(-1.43011048969),TRINITY_DN2727_c2_g2(2.80700894859),TRINITY_DN3667_c3_g3(-1.03216184042)
GO:0010332	response to gamma radiation	biological process	4/234	7/681	0.18834	1	TRINITY_DN3135_c2_g3(1.84163748525),TRINITY_DN3238_c1_g1(4.68706194956),TRINITY_DN3311_c1_g2(-1.13281740221),TRINITY_DN3355_c2_g2(-1.83919966724)	TRINITY_DN3135_c2_g3(1.84163748525),TRINITY_DN3238_c1_g1(4.68706194956),TRINITY_DN3311_c1_g2(-1.13281740221),TRINITY_DN3355_c2_g2(-1.83919966724)
GO:0031334	positive regulation of protein complex assembly	biological process	4/234	7/681	0.18834	1	TRINITY_DN2624_c3_g2(-1.7395971044),TRINITY_DN2881_c4_g1(-2.13230653776),TRINITY_DN3495_c0_g2(-1.90844140963),TRINITY_DN3688_c1_g7(-2.38640377363)	TRINITY_DN2624_c3_g2(-1.7395971044),TRINITY_DN2881_c4_g1(-2.13230653776),TRINITY_DN3495_c0_g2(-1.90844140963),TRINITY_DN3688_c1_g7(-2.38640377363)
GO:0033157	regulation of intracellular protein transport	biological process	4/234	7/681	0.18834	1	TRINITY_DN2618_c2_g3(1.16746035949),TRINITY_DN3512_c0_g2(-1.87901474245),TRINITY_DN3656_c1_g1(-2.08721167236),TRINITY_DN3656_c1_g5(-3.02684114829)	TRINITY_DN2618_c2_g3(1.16746035949),TRINITY_DN3512_c0_g2(-1.87901474245),TRINITY_DN3656_c1_g1(-2.08721167236),TRINITY_DN3656_c1_g5(-3.02684114829)
GO:0045927	positive regulation of growth	biological process	4/234	7/681	0.18834	1	TRINITY_DN2618_c2_g3(1.16746035949),TRINITY_DN3512_c0_g2(-1.87901474245),TRINITY_DN3656_c1_g1(-2.08721167236),TRINITY_DN3656_c1_g5(-3.02684114829)	TRINITY_DN2618_c2_g3(1.16746035949),TRINITY_DN3512_c0_g2(-1.87901474245),TRINITY_DN3656_c1_g1(-2.08721167236),TRINITY_DN3656_c1_g5(-3.02684114829)
GO:0046822	regulation of nucleocytoplasmic transport	biological process	4/234	7/681	0.18834	1	TRINITY_DN2618_c2_g3(1.16746035949),TRINITY_DN3512_c0_g2(-1.87901474245),TRINITY_DN3656_c1_g1(-2.08721167236),TRINITY_DN3656_c1_g5(-3.02684114829)	TRINITY_DN2618_c2_g3(1.16746035949),TRINITY_DN3512_c0_g2(-1.87901474245),TRINITY_DN3656_c1_g1(-2.08721167236),TRINITY_DN3656_c1_g5(-3.02684114829)
GO:0048749	compound eye development	biological process	4/234	7/681	0.18834	1	TRINITY_DN2244_c0_g1(-2.14833104305),TRINITY_DN2670_c0_g1(-1.16807489944),TRINITY_DN2830_c1_g6(-2.81950059698),TRINITY_DN2990_c3_g1(4.48637222765)	TRINITY_DN2244_c0_g1(-2.14833104305),TRINITY_DN2670_c0_g1(-1.16807489944),TRINITY_DN2830_c1_g6(-2.81950059698),TRINITY_DN2990_c3_g1(4.48637222765)
GO:0051304	chromosome separation	biological process	4/234	7/681	0.18834	1	TRINITY_DN2674_c3_g1(-1.20247600187),TRINITY_DN2830_c1_g6(-2.81950059698),TRINITY_DN2986_c3_g1(-1.95868262638),TRINITY_DN3688_c1_g7(-2.38640377363)	TRINITY_DN2674_c3_g1(-1.20247600187),TRINITY_DN2830_c1_g6(-2.81950059698),TRINITY_DN2986_c3_g1(-1.95868262638),TRINITY_DN3688_c1_g7(-2.38640377363)
GO:0051606	detection of stimulus	biological process	4/234	7/681	0.18834	1	TRINITY_DN1268_c0_g1(-2.06811775799),TRINITY_DN1453_c0_g1(-2.82693098456),TRINITY_DN1926_c0_g1(-2.31459139144),TRINITY_DN3593_c1_g1(-1.02641959886)	TRINITY_DN1268_c0_g1(-2.06811775799),TRINITY_DN1453_c0_g1(-2.82693098456),TRINITY_DN1926_c0_g1(-2.31459139144),TRINITY_DN3593_c1_g1(-1.02641959886)
GO:0060560	developmental growth involved in morphogenesis	biological process	4/234	7/681	0.18834	1	TRINITY_DN2767_c3_g3(-1.67248354228),TRINITY_DN3034_c3_g2(-2.78869539746),TRINITY_DN3324_c1_g1(-1.19910771168),TRINITY_DN3496_c4_g3(-1.18941672544)	TRINITY_DN2767_c3_g3(-1.67248354228),TRINITY_DN3034_c3_g2(-2.78869539746),TRINITY_DN3324_c1_g1(-1.19910771168),TRINITY_DN3496_c4_g3(-1.18941672544)
GO:0061982	meiosis I cell cycle process	biological process	4/234	7/681	0.18834	1	TRINITY_DN2674_c3_g1(-1.20247600187),TRINITY_DN2834_c2_g1(-1.88177373969),TRINITY_DN2880_c5_g2(-1.41891648753),TRINITY_DN2986_c3_g1(-1.95868262638)	TRINITY_DN2674_c3_g1(-1.20247600187),TRINITY_DN2834_c2_g1(-1.88177373969),TRINITY_DN2880_c5_g2(-1.41891648753),TRINITY_DN2986_c3_g1(-1.95868262638)
GO:0071902	positive regulation of protein serine/threonine kinase activity	biological process	4/234	7/681	0.18834	1	TRINITY_DN1551_c0_g1(-2.62773240149),TRINITY_DN3135_c2_g3(1.84163748525),TRINITY_DN3238_c1_g1(4.68706194956),TRINITY_DN3355_c2_g2(-1.83919966724)	TRINITY_DN1551_c0_g1(-2.62773240149),TRINITY_DN3135_c2_g3(1.84163748525),TRINITY_DN3238_c1_g1(4.68706194956),TRINITY_DN3355_c2_g2(-1.83919966724)
GO:0034220	ion transmembrane transport	biological process	26/234	65/681	0.19162	1	TRINITY_DN1357_c0_g1(-2.55339730538),TRINITY_DN1903_c0_g1(-1.0299931519),TRINITY_DN2198_c0_g1(1.02592882666),TRINITY_DN2539_c0_g1(-1.81563107104),TRINITY_DN2642_c2_g4(2.69107002639),TRINITY_DN2677_c1_g2(1.75084897723),TRINITY_DN2823_c2_g4(-1.13639408501),TRINITY_DN2848_c1_g1(1.48364203419),TRINITY_DN2981_c1_g1(-1.28653934136),TRINITY_DN2991_c1_g2(-1.38723740444),TRINITY_DN2991_c6_g5(-1.0033510942…	TRINITY_DN1357_c0_g1(-2.55339730538),TRINITY_DN1903_c0_g1(-1.0299931519),TRINITY_DN2198_c0_g1(1.02592882666),TRINITY_DN2539_c0_g1(-1.81563107104),TRINITY_DN2642_c2_g4(2.69107002639),TRINITY_DN2677_c1_g2(1.75084897723),TRINITY_DN2823_c2_g4(-1.13639408501),TRINITY_DN2848_c1_g1(1.48364203419),TRINITY_DN2981_c1_g1(-1.28653934136),TRINITY_DN2991_c1_g2(-1.38723740444),TRINITY_DN2991_c6_g5(-1.0033510942…
GO:0001932	regulation of protein phosphorylation	biological process	8/234	17/681	0.19375	1	TRINITY_DN1551_c0_g1(-2.62773240149),TRINITY_DN2618_c2_g3(1.16746035949),TRINITY_DN3135_c2_g3(1.84163748525),TRINITY_DN3238_c1_g1(4.68706194956),TRINITY_DN3355_c2_g2(-1.83919966724),TRINITY_DN3512_c0_g2(-1.87901474245),TRINITY_DN3656_c1_g1(-2.08721167236),TRINITY_DN3656_c1_g5(-3.02684114829)	TRINITY_DN1551_c0_g1(-2.62773240149),TRINITY_DN2618_c2_g3(1.16746035949),TRINITY_DN3135_c2_g3(1.84163748525),TRINITY_DN3238_c1_g1(4.68706194956),TRINITY_DN3355_c2_g2(-1.83919966724),TRINITY_DN3512_c0_g2(-1.87901474245),TRINITY_DN3656_c1_g1(-2.08721167236),TRINITY_DN3656_c1_g5(-3.02684114829)
GO:0043549	regulation of kinase activity	biological process	8/234	17/681	0.19375	1	TRINITY_DN1551_c0_g1(-2.62773240149),TRINITY_DN2618_c2_g3(1.16746035949),TRINITY_DN3135_c2_g3(1.84163748525),TRINITY_DN3238_c1_g1(4.68706194956),TRINITY_DN3355_c2_g2(-1.83919966724),TRINITY_DN3512_c0_g2(-1.87901474245),TRINITY_DN3656_c1_g1(-2.08721167236),TRINITY_DN3656_c1_g5(-3.02684114829)	TRINITY_DN1551_c0_g1(-2.62773240149),TRINITY_DN2618_c2_g3(1.16746035949),TRINITY_DN3135_c2_g3(1.84163748525),TRINITY_DN3238_c1_g1(4.68706194956),TRINITY_DN3355_c2_g2(-1.83919966724),TRINITY_DN3512_c0_g2(-1.87901474245),TRINITY_DN3656_c1_g1(-2.08721167236),TRINITY_DN3656_c1_g5(-3.02684114829)
GO:0098542	defense response to other organism	biological process	16/234	38/681	0.19412	1	TRINITY_DN1383_c0_g2(-5.09453204951),TRINITY_DN1453_c0_g1(-2.82693098456),TRINITY_DN2506_c1_g2(2.69390264406),TRINITY_DN2522_c0_g1(1.71353669634),TRINITY_DN2638_c4_g1(-1.94308971346),TRINITY_DN2638_c4_g3(-1.69613457802),TRINITY_DN2670_c2_g4(-1.43011048969),TRINITY_DN2670_c2_g6(-1.02619526061),TRINITY_DN2727_c2_g2(2.80700894859),TRINITY_DN3243_c2_g4(1.8219994837),TRINITY_DN3324_c1_g1(-1.1991077116…	TRINITY_DN1383_c0_g2(-5.09453204951),TRINITY_DN1453_c0_g1(-2.82693098456),TRINITY_DN2506_c1_g2(2.69390264406),TRINITY_DN2522_c0_g1(1.71353669634),TRINITY_DN2638_c4_g1(-1.94308971346),TRINITY_DN2638_c4_g3(-1.69613457802),TRINITY_DN2670_c2_g4(-1.43011048969),TRINITY_DN2670_c2_g6(-1.02619526061),TRINITY_DN2727_c2_g2(2.80700894859),TRINITY_DN3243_c2_g4(1.8219994837),TRINITY_DN3324_c1_g1(-1.1991077116…
GO:0032101	regulation of response to external stimulus	biological process	6/234	12/681	0.19701	1	TRINITY_DN2618_c2_g3(1.16746035949),TRINITY_DN2863_c0_g2(-1.17670982061),TRINITY_DN3032_c1_g3(-1.81290474391),TRINITY_DN3512_c0_g2(-1.87901474245),TRINITY_DN3656_c1_g1(-2.08721167236),TRINITY_DN3656_c1_g5(-3.02684114829)	TRINITY_DN2618_c2_g3(1.16746035949),TRINITY_DN2863_c0_g2(-1.17670982061),TRINITY_DN3032_c1_g3(-1.81290474391),TRINITY_DN3512_c0_g2(-1.87901474245),TRINITY_DN3656_c1_g1(-2.08721167236),TRINITY_DN3656_c1_g5(-3.02684114829)
GO:0035690	cellular response to drug	biological process	6/234	12/681	0.19701	1	TRINITY_DN2618_c2_g3(1.16746035949),TRINITY_DN3455_c5_g4(-1.38140557462),TRINITY_DN3512_c0_g2(-1.87901474245),TRINITY_DN3634_c5_g2(-1.43389994753),TRINITY_DN3656_c1_g1(-2.08721167236),TRINITY_DN3656_c1_g5(-3.02684114829)	TRINITY_DN2618_c2_g3(1.16746035949),TRINITY_DN3455_c5_g4(-1.38140557462),TRINITY_DN3512_c0_g2(-1.87901474245),TRINITY_DN3634_c5_g2(-1.43389994753),TRINITY_DN3656_c1_g1(-2.08721167236),TRINITY_DN3656_c1_g5(-3.02684114829)
GO:0098813	nuclear chromosome segregation	biological process	6/234	12/681	0.19701	1	TRINITY_DN2674_c3_g1(-1.20247600187),TRINITY_DN2830_c1_g6(-2.81950059698),TRINITY_DN2986_c3_g1(-1.95868262638),TRINITY_DN3368_c3_g3(-1.35865189413),TRINITY_DN3522_c0_g5(-1.94485287609),TRINITY_DN3688_c1_g7(-2.38640377363)	TRINITY_DN2674_c3_g1(-1.20247600187),TRINITY_DN2830_c1_g6(-2.81950059698),TRINITY_DN2986_c3_g1(-1.95868262638),TRINITY_DN3368_c3_g3(-1.35865189413),TRINITY_DN3522_c0_g5(-1.94485287609),TRINITY_DN3688_c1_g7(-2.38640377363)
GO:0043085	positive regulation of catalytic activity	biological process	11/234	25/681	0.20446	1	TRINITY_DN1268_c0_g1(-2.06811775799),TRINITY_DN1551_c0_g1(-2.62773240149),TRINITY_DN2618_c2_g3(1.16746035949),TRINITY_DN3135_c2_g3(1.84163748525),TRINITY_DN3238_c1_g1(4.68706194956),TRINITY_DN3311_c1_g2(-1.13281740221),TRINITY_DN3345_c3_g2(-1.99589681954),TRINITY_DN3355_c2_g2(-1.83919966724),TRINITY_DN3512_c0_g2(-1.87901474245),TRINITY_DN3656_c1_g1(-2.08721167236),TRINITY_DN3656_c1_g5(-3.02684114…	TRINITY_DN1268_c0_g1(-2.06811775799),TRINITY_DN1551_c0_g1(-2.62773240149),TRINITY_DN2618_c2_g3(1.16746035949),TRINITY_DN3135_c2_g3(1.84163748525),TRINITY_DN3238_c1_g1(4.68706194956),TRINITY_DN3311_c1_g2(-1.13281740221),TRINITY_DN3345_c3_g2(-1.99589681954),TRINITY_DN3355_c2_g2(-1.83919966724),TRINITY_DN3512_c0_g2(-1.87901474245),TRINITY_DN3656_c1_g1(-2.08721167236),TRINITY_DN3656_c1_g5(-3.02684114…
GO:0120036	plasma membrane bounded cell projection organization	biological process	11/234	25/681	0.20446	1	TRINITY_DN109_c0_g1(-2.43108989434),TRINITY_DN1245_c0_g2(-3.43593361414),TRINITY_DN1483_c0_g1(-2.10294444973),TRINITY_DN1551_c0_g1(-2.62773240149),TRINITY_DN2656_c0_g2(-4.58846026162),TRINITY_DN2990_c3_g1(4.48637222765),TRINITY_DN3032_c1_g3(-1.81290474391),TRINITY_DN311_c0_g1(-3.06936398231),TRINITY_DN3282_c0_g4(1.20593803666),TRINITY_DN3526_c2_g3(-3.28668474605),TRINITY_DN99_c0_g1(-1.6657118923)	TRINITY_DN109_c0_g1(-2.43108989434),TRINITY_DN1245_c0_g2(-3.43593361414),TRINITY_DN1483_c0_g1(-2.10294444973),TRINITY_DN1551_c0_g1(-2.62773240149),TRINITY_DN2656_c0_g2(-4.58846026162),TRINITY_DN2990_c3_g1(4.48637222765),TRINITY_DN3032_c1_g3(-1.81290474391),TRINITY_DN311_c0_g1(-3.06936398231),TRINITY_DN3282_c0_g4(1.20593803666),TRINITY_DN3526_c2_g3(-3.28668474605),TRINITY_DN99_c0_g1(-1.6657118923)
GO:0010033	response to organic substance	biological process	38/234	99/681	0.21182	1	TRINITY_DN1357_c0_g1(-2.55339730538),TRINITY_DN1383_c0_g2(-5.09453204951),TRINITY_DN1453_c0_g1(-2.82693098456),TRINITY_DN1494_c0_g1(-2.19265717403),TRINITY_DN1896_c0_g1(-1.43122376696),TRINITY_DN2522_c0_g1(1.71353669634),TRINITY_DN2618_c2_g3(1.16746035949),TRINITY_DN2638_c4_g1(-1.94308971346),TRINITY_DN2638_c4_g3(-1.69613457802),TRINITY_DN2670_c2_g6(-1.02619526061),TRINITY_DN2677_c1_g2(1.75084897…	TRINITY_DN1357_c0_g1(-2.55339730538),TRINITY_DN1383_c0_g2(-5.09453204951),TRINITY_DN1453_c0_g1(-2.82693098456),TRINITY_DN1494_c0_g1(-2.19265717403),TRINITY_DN1896_c0_g1(-1.43122376696),TRINITY_DN2522_c0_g1(1.71353669634),TRINITY_DN2618_c2_g3(1.16746035949),TRINITY_DN2638_c4_g1(-1.94308971346),TRINITY_DN2638_c4_g3(-1.69613457802),TRINITY_DN2670_c2_g6(-1.02619526061),TRINITY_DN2677_c1_g2(1.75084897…
GO:0009617	response to bacterium	biological process	9/234	20/681	0.21581	1	TRINITY_DN1453_c0_g1(-2.82693098456),TRINITY_DN2522_c0_g1(1.71353669634),TRINITY_DN2638_c4_g1(-1.94308971346),TRINITY_DN2638_c4_g3(-1.69613457802),TRINITY_DN2670_c2_g4(-1.43011048969),TRINITY_DN3243_c2_g4(1.8219994837),TRINITY_DN3627_c0_g3(-1.19857734941),TRINITY_DN3667_c3_g3(-1.03216184042),TRINITY_DN886_c0_g1(3.44157379396)	TRINITY_DN1453_c0_g1(-2.82693098456),TRINITY_DN2522_c0_g1(1.71353669634),TRINITY_DN2638_c4_g1(-1.94308971346),TRINITY_DN2638_c4_g3(-1.69613457802),TRINITY_DN2670_c2_g4(-1.43011048969),TRINITY_DN3243_c2_g4(1.8219994837),TRINITY_DN3627_c0_g3(-1.19857734941),TRINITY_DN3667_c3_g3(-1.03216184042),TRINITY_DN886_c0_g1(3.44157379396)
GO:0048468	cell development	biological process	15/234	36/681	0.21931	1	TRINITY_DN1577_c0_g1(-1.27109622825),TRINITY_DN2244_c0_g1(-2.14833104305),TRINITY_DN2618_c2_g3(1.16746035949),TRINITY_DN2670_c0_g1(-1.16807489944),TRINITY_DN2767_c3_g3(-1.67248354228),TRINITY_DN2948_c3_g2(-1.25152991183),TRINITY_DN2990_c3_g1(4.48637222765),TRINITY_DN3282_c0_g4(1.20593803666),TRINITY_DN3324_c1_g1(-1.19910771168),TRINITY_DN3344_c2_g2(-1.07984282302),TRINITY_DN3416_c0_g3(-1.06697066…	TRINITY_DN1577_c0_g1(-1.27109622825),TRINITY_DN2244_c0_g1(-2.14833104305),TRINITY_DN2618_c2_g3(1.16746035949),TRINITY_DN2670_c0_g1(-1.16807489944),TRINITY_DN2767_c3_g3(-1.67248354228),TRINITY_DN2948_c3_g2(-1.25152991183),TRINITY_DN2990_c3_g1(4.48637222765),TRINITY_DN3282_c0_g4(1.20593803666),TRINITY_DN3324_c1_g1(-1.19910771168),TRINITY_DN3344_c2_g2(-1.07984282302),TRINITY_DN3416_c0_g3(-1.06697066…
GO:0000154	rRNA modification	biological process	3/234	5/681	0.22463	1	TRINITY_DN3002_c7_g7(1.15397086811),TRINITY_DN3160_c3_g6(1.13017127252),TRINITY_DN3522_c0_g2(-1.86254793253)	TRINITY_DN3002_c7_g7(1.15397086811),TRINITY_DN3160_c3_g6(1.13017127252),TRINITY_DN3522_c0_g2(-1.86254793253)
GO:0000186	activation of MAPKK activity	biological process	3/234	5/681	0.22463	1	TRINITY_DN3135_c2_g3(1.84163748525),TRINITY_DN3238_c1_g1(4.68706194956),TRINITY_DN3355_c2_g2(-1.83919966724)	TRINITY_DN3135_c2_g3(1.84163748525),TRINITY_DN3238_c1_g1(4.68706194956),TRINITY_DN3355_c2_g2(-1.83919966724)
GO:0001745	compound eye morphogenesis	biological process	3/234	5/681	0.22463	1	TRINITY_DN2244_c0_g1(-2.14833104305),TRINITY_DN2670_c0_g1(-1.16807489944),TRINITY_DN2990_c3_g1(4.48637222765)	TRINITY_DN2244_c0_g1(-2.14833104305),TRINITY_DN2670_c0_g1(-1.16807489944),TRINITY_DN2990_c3_g1(4.48637222765)
GO:0006275	regulation of DNA replication	biological process	3/234	5/681	0.22463	1	TRINITY_DN1577_c0_g1(-1.27109622825),TRINITY_DN2834_c2_g1(-1.88177373969),TRINITY_DN3034_c3_g2(-2.78869539746)	TRINITY_DN1577_c0_g1(-1.27109622825),TRINITY_DN2834_c2_g1(-1.88177373969),TRINITY_DN3034_c3_g2(-2.78869539746)
GO:0006551	leucine metabolic process	biological process	3/234	5/681	0.22463	1	TRINITY_DN2481_c5_g1(-1.72793019786),TRINITY_DN2989_c0_g3(-1.94950554293),TRINITY_DN3463_c3_g2(1.40977209201)	TRINITY_DN2481_c5_g1(-1.72793019786),TRINITY_DN2989_c0_g3(-1.94950554293),TRINITY_DN3463_c3_g2(1.40977209201)
GO:0006664	glycolipid metabolic process	biological process	3/234	5/681	0.22463	1	TRINITY_DN2244_c0_g1(-2.14833104305),TRINITY_DN2670_c0_g1(-1.16807489944),TRINITY_DN2767_c3_g3(-1.67248354228)	TRINITY_DN2244_c0_g1(-2.14833104305),TRINITY_DN2670_c0_g1(-1.16807489944),TRINITY_DN2767_c3_g3(-1.67248354228)
GO:0007254	JNK cascade	biological process	3/234	5/681	0.22463	1	TRINITY_DN3135_c2_g3(1.84163748525),TRINITY_DN3238_c1_g1(4.68706194956),TRINITY_DN3355_c2_g2(-1.83919966724)	TRINITY_DN3135_c2_g3(1.84163748525),TRINITY_DN3238_c1_g1(4.68706194956),TRINITY_DN3355_c2_g2(-1.83919966724)
GO:0007257	activation of JUN kinase activity	biological process	3/234	5/681	0.22463	1	TRINITY_DN3135_c2_g3(1.84163748525),TRINITY_DN3238_c1_g1(4.68706194956),TRINITY_DN3355_c2_g2(-1.83919966724)	TRINITY_DN3135_c2_g3(1.84163748525),TRINITY_DN3238_c1_g1(4.68706194956),TRINITY_DN3355_c2_g2(-1.83919966724)
GO:0007416	synapse assembly	biological process	3/234	5/681	0.22463	1	TRINITY_DN2948_c3_g2(-1.25152991183),TRINITY_DN3344_c2_g2(-1.07984282302),TRINITY_DN3416_c0_g3(-1.06697066005)	TRINITY_DN2948_c3_g2(-1.25152991183),TRINITY_DN3344_c2_g2(-1.07984282302),TRINITY_DN3416_c0_g3(-1.06697066005)
GO:0007617	mating behavior	biological process	3/234	5/681	0.22463	1	TRINITY_DN2948_c3_g2(-1.25152991183),TRINITY_DN3344_c2_g2(-1.07984282302),TRINITY_DN3416_c0_g3(-1.06697066005)	TRINITY_DN2948_c3_g2(-1.25152991183),TRINITY_DN3344_c2_g2(-1.07984282302),TRINITY_DN3416_c0_g3(-1.06697066005)
GO:0007618	mating	biological process	3/234	5/681	0.22463	1	TRINITY_DN2948_c3_g2(-1.25152991183),TRINITY_DN3344_c2_g2(-1.07984282302),TRINITY_DN3416_c0_g3(-1.06697066005)	TRINITY_DN2948_c3_g2(-1.25152991183),TRINITY_DN3344_c2_g2(-1.07984282302),TRINITY_DN3416_c0_g3(-1.06697066005)
GO:0007619	courtship behavior	biological process	3/234	5/681	0.22463	1	TRINITY_DN2948_c3_g2(-1.25152991183),TRINITY_DN3344_c2_g2(-1.07984282302),TRINITY_DN3416_c0_g3(-1.06697066005)	TRINITY_DN2948_c3_g2(-1.25152991183),TRINITY_DN3344_c2_g2(-1.07984282302),TRINITY_DN3416_c0_g3(-1.06697066005)
GO:0008333	endosome to lysosome transport	biological process	3/234	5/681	0.22463	1	TRINITY_DN2948_c3_g2(-1.25152991183),TRINITY_DN3344_c2_g2(-1.07984282302),TRINITY_DN3416_c0_g3(-1.06697066005)	TRINITY_DN2948_c3_g2(-1.25152991183),TRINITY_DN3344_c2_g2(-1.07984282302),TRINITY_DN3416_c0_g3(-1.06697066005)
GO:0009081	branched-chain amino acid metabolic process	biological process	3/234	5/681	0.22463	1	TRINITY_DN2481_c5_g1(-1.72793019786),TRINITY_DN2989_c0_g3(-1.94950554293),TRINITY_DN3463_c3_g2(1.40977209201)	TRINITY_DN2481_c5_g1(-1.72793019786),TRINITY_DN2989_c0_g3(-1.94950554293),TRINITY_DN3463_c3_g2(1.40977209201)
GO:0009247	glycolipid biosynthetic process	biological process	3/234	5/681	0.22463	1	TRINITY_DN2244_c0_g1(-2.14833104305),TRINITY_DN2670_c0_g1(-1.16807489944),TRINITY_DN2767_c3_g3(-1.67248354228)	TRINITY_DN2244_c0_g1(-2.14833104305),TRINITY_DN2670_c0_g1(-1.16807489944),TRINITY_DN2767_c3_g3(-1.67248354228)
GO:0009642	response to light intensity	biological process	3/234	5/681	0.22463	1	TRINITY_DN3078_c1_g7(-1.41151727277),TRINITY_DN3502_c0_g1(-1.23001299537),TRINITY_DN3627_c0_g3(-1.19857734941)	TRINITY_DN3078_c1_g7(-1.41151727277),TRINITY_DN3502_c0_g1(-1.23001299537),TRINITY_DN3627_c0_g3(-1.19857734941)
GO:0009644	response to high light intensity	biological process	3/234	5/681	0.22463	1	TRINITY_DN3078_c1_g7(-1.41151727277),TRINITY_DN3502_c0_g1(-1.23001299537),TRINITY_DN3627_c0_g3(-1.19857734941)	TRINITY_DN3078_c1_g7(-1.41151727277),TRINITY_DN3502_c0_g1(-1.23001299537),TRINITY_DN3627_c0_g3(-1.19857734941)
GO:0009880	embryonic pattern specification	biological process	3/234	5/681	0.22463	1	TRINITY_DN1551_c0_g1(-2.62773240149),TRINITY_DN2990_c3_g1(4.48637222765),TRINITY_DN3071_c0_g4(-1.25105018748)	TRINITY_DN1551_c0_g1(-2.62773240149),TRINITY_DN2990_c3_g1(4.48637222765),TRINITY_DN3071_c0_g4(-1.25105018748)
GO:0010623	programmed cell death involved in cell development	biological process	3/234	5/681	0.22463	1	TRINITY_DN2948_c3_g2(-1.25152991183),TRINITY_DN3344_c2_g2(-1.07984282302),TRINITY_DN3416_c0_g3(-1.06697066005)	TRINITY_DN2948_c3_g2(-1.25152991183),TRINITY_DN3344_c2_g2(-1.07984282302),TRINITY_DN3416_c0_g3(-1.06697066005)
GO:0032872	regulation of stress-activated MAPK cascade	biological process	3/234	5/681	0.22463	1	TRINITY_DN3135_c2_g3(1.84163748525),TRINITY_DN3238_c1_g1(4.68706194956),TRINITY_DN3355_c2_g2(-1.83919966724)	TRINITY_DN3135_c2_g3(1.84163748525),TRINITY_DN3238_c1_g1(4.68706194956),TRINITY_DN3355_c2_g2(-1.83919966724)
GO:0032874	positive regulation of stress-activated MAPK cascade	biological process	3/234	5/681	0.22463	1	TRINITY_DN3135_c2_g3(1.84163748525),TRINITY_DN3238_c1_g1(4.68706194956),TRINITY_DN3355_c2_g2(-1.83919966724)	TRINITY_DN3135_c2_g3(1.84163748525),TRINITY_DN3238_c1_g1(4.68706194956),TRINITY_DN3355_c2_g2(-1.83919966724)
GO:0043506	regulation of JUN kinase activity	biological process	3/234	5/681	0.22463	1	TRINITY_DN3135_c2_g3(1.84163748525),TRINITY_DN3238_c1_g1(4.68706194956),TRINITY_DN3355_c2_g2(-1.83919966724)	TRINITY_DN3135_c2_g3(1.84163748525),TRINITY_DN3238_c1_g1(4.68706194956),TRINITY_DN3355_c2_g2(-1.83919966724)
GO:0043507	positive regulation of JUN kinase activity	biological process	3/234	5/681	0.22463	1	TRINITY_DN3135_c2_g3(1.84163748525),TRINITY_DN3238_c1_g1(4.68706194956),TRINITY_DN3355_c2_g2(-1.83919966724)	TRINITY_DN3135_c2_g3(1.84163748525),TRINITY_DN3238_c1_g1(4.68706194956),TRINITY_DN3355_c2_g2(-1.83919966724)
GO:0045476	nurse cell apoptotic process	biological process	3/234	5/681	0.22463	1	TRINITY_DN2948_c3_g2(-1.25152991183),TRINITY_DN3344_c2_g2(-1.07984282302),TRINITY_DN3416_c0_g3(-1.06697066005)	TRINITY_DN2948_c3_g2(-1.25152991183),TRINITY_DN3344_c2_g2(-1.07984282302),TRINITY_DN3416_c0_g3(-1.06697066005)
GO:0046328	regulation of JNK cascade	biological process	3/234	5/681	0.22463	1	TRINITY_DN3135_c2_g3(1.84163748525),TRINITY_DN3238_c1_g1(4.68706194956),TRINITY_DN3355_c2_g2(-1.83919966724)	TRINITY_DN3135_c2_g3(1.84163748525),TRINITY_DN3238_c1_g1(4.68706194956),TRINITY_DN3355_c2_g2(-1.83919966724)
GO:0046330	positive regulation of JNK cascade	biological process	3/234	5/681	0.22463	1	TRINITY_DN3135_c2_g3(1.84163748525),TRINITY_DN3238_c1_g1(4.68706194956),TRINITY_DN3355_c2_g2(-1.83919966724)	TRINITY_DN3135_c2_g3(1.84163748525),TRINITY_DN3238_c1_g1(4.68706194956),TRINITY_DN3355_c2_g2(-1.83919966724)
GO:0046530	photoreceptor cell differentiation	biological process	3/234	5/681	0.22463	1	TRINITY_DN2244_c0_g1(-2.14833104305),TRINITY_DN2670_c0_g1(-1.16807489944),TRINITY_DN2990_c3_g1(4.48637222765)	TRINITY_DN2244_c0_g1(-2.14833104305),TRINITY_DN2670_c0_g1(-1.16807489944),TRINITY_DN2990_c3_g1(4.48637222765)
GO:0048592	eye morphogenesis	biological process	3/234	5/681	0.22463	1	TRINITY_DN2244_c0_g1(-2.14833104305),TRINITY_DN2670_c0_g1(-1.16807489944),TRINITY_DN2990_c3_g1(4.48637222765)	TRINITY_DN2244_c0_g1(-2.14833104305),TRINITY_DN2670_c0_g1(-1.16807489944),TRINITY_DN2990_c3_g1(4.48637222765)
GO:0050803	regulation of synapse structure or activity	biological process	3/234	5/681	0.22463	1	TRINITY_DN2948_c3_g2(-1.25152991183),TRINITY_DN3344_c2_g2(-1.07984282302),TRINITY_DN3416_c0_g3(-1.06697066005)	TRINITY_DN2948_c3_g2(-1.25152991183),TRINITY_DN3344_c2_g2(-1.07984282302),TRINITY_DN3416_c0_g3(-1.06697066005)
GO:0050807	regulation of synapse organization	biological process	3/234	5/681	0.22463	1	TRINITY_DN2948_c3_g2(-1.25152991183),TRINITY_DN3344_c2_g2(-1.07984282302),TRINITY_DN3416_c0_g3(-1.06697066005)	TRINITY_DN2948_c3_g2(-1.25152991183),TRINITY_DN3344_c2_g2(-1.07984282302),TRINITY_DN3416_c0_g3(-1.06697066005)
GO:0051262	protein tetramerization	biological process	3/234	5/681	0.22463	1	TRINITY_DN2899_c0_g4(1.57608294052),TRINITY_DN3141_c1_g4(-1.27569617362),TRINITY_DN3502_c1_g5(1.45165584107)	TRINITY_DN2899_c0_g4(1.57608294052),TRINITY_DN3141_c1_g4(-1.27569617362),TRINITY_DN3502_c1_g5(1.45165584107)
GO:0051403	stress-activated MAPK cascade	biological process	3/234	5/681	0.22463	1	TRINITY_DN3135_c2_g3(1.84163748525),TRINITY_DN3238_c1_g1(4.68706194956),TRINITY_DN3355_c2_g2(-1.83919966724)	TRINITY_DN3135_c2_g3(1.84163748525),TRINITY_DN3238_c1_g1(4.68706194956),TRINITY_DN3355_c2_g2(-1.83919966724)
GO:0070302	regulation of stress-activated protein kinase signaling cascade	biological process	3/234	5/681	0.22463	1	TRINITY_DN3135_c2_g3(1.84163748525),TRINITY_DN3238_c1_g1(4.68706194956),TRINITY_DN3355_c2_g2(-1.83919966724)	TRINITY_DN3135_c2_g3(1.84163748525),TRINITY_DN3238_c1_g1(4.68706194956),TRINITY_DN3355_c2_g2(-1.83919966724)
GO:0070304	positive regulation of stress-activated protein kinase signaling cascade	biological process	3/234	5/681	0.22463	1	TRINITY_DN3135_c2_g3(1.84163748525),TRINITY_DN3238_c1_g1(4.68706194956),TRINITY_DN3355_c2_g2(-1.83919966724)	TRINITY_DN3135_c2_g3(1.84163748525),TRINITY_DN3238_c1_g1(4.68706194956),TRINITY_DN3355_c2_g2(-1.83919966724)
GO:0090329	regulation of DNA-dependent DNA replication	biological process	3/234	5/681	0.22463	1	TRINITY_DN1577_c0_g1(-1.27109622825),TRINITY_DN2834_c2_g1(-1.88177373969),TRINITY_DN3034_c3_g2(-2.78869539746)	TRINITY_DN1577_c0_g1(-1.27109622825),TRINITY_DN2834_c2_g1(-1.88177373969),TRINITY_DN3034_c3_g2(-2.78869539746)
GO:0090596	sensory organ morphogenesis	biological process	3/234	5/681	0.22463	1	TRINITY_DN2244_c0_g1(-2.14833104305),TRINITY_DN2670_c0_g1(-1.16807489944),TRINITY_DN2990_c3_g1(4.48637222765)	TRINITY_DN2244_c0_g1(-2.14833104305),TRINITY_DN2670_c0_g1(-1.16807489944),TRINITY_DN2990_c3_g1(4.48637222765)
GO:1902742	apoptotic process involved in development	biological process	3/234	5/681	0.22463	1	TRINITY_DN2948_c3_g2(-1.25152991183),TRINITY_DN3344_c2_g2(-1.07984282302),TRINITY_DN3416_c0_g3(-1.06697066005)	TRINITY_DN2948_c3_g2(-1.25152991183),TRINITY_DN3344_c2_g2(-1.07984282302),TRINITY_DN3416_c0_g3(-1.06697066005)
GO:1903509	liposaccharide metabolic process	biological process	3/234	5/681	0.22463	1	TRINITY_DN2244_c0_g1(-2.14833104305),TRINITY_DN2670_c0_g1(-1.16807489944),TRINITY_DN2767_c3_g3(-1.67248354228)	TRINITY_DN2244_c0_g1(-2.14833104305),TRINITY_DN2670_c0_g1(-1.16807489944),TRINITY_DN2767_c3_g3(-1.67248354228)
GO:1905879	regulation of oogenesis	biological process	3/234	5/681	0.22463	1	TRINITY_DN2948_c3_g2(-1.25152991183),TRINITY_DN3344_c2_g2(-1.07984282302),TRINITY_DN3416_c0_g3(-1.06697066005)	TRINITY_DN2948_c3_g2(-1.25152991183),TRINITY_DN3344_c2_g2(-1.07984282302),TRINITY_DN3416_c0_g3(-1.06697066005)
GO:0008219	cell death	biological process	19/234	47/681	0.22541	1	TRINITY_DN1267_c0_g1(-3.74317437745),TRINITY_DN1551_c0_g1(-2.62773240149),TRINITY_DN2512_c2_g5(-3.78741905927),TRINITY_DN2618_c2_g3(1.16746035949),TRINITY_DN2948_c3_g2(-1.25152991183),TRINITY_DN2990_c3_g1(4.48637222765),TRINITY_DN3135_c2_g3(1.84163748525),TRINITY_DN3238_c1_g1(4.68706194956),TRINITY_DN3285_c2_g1(-1.58640393684),TRINITY_DN3311_c1_g2(-1.13281740221),TRINITY_DN3344_c2_g2(-1.079842823…	TRINITY_DN1267_c0_g1(-3.74317437745),TRINITY_DN1551_c0_g1(-2.62773240149),TRINITY_DN2512_c2_g5(-3.78741905927),TRINITY_DN2618_c2_g3(1.16746035949),TRINITY_DN2948_c3_g2(-1.25152991183),TRINITY_DN2990_c3_g1(4.48637222765),TRINITY_DN3135_c2_g3(1.84163748525),TRINITY_DN3238_c1_g1(4.68706194956),TRINITY_DN3285_c2_g1(-1.58640393684),TRINITY_DN3311_c1_g2(-1.13281740221),TRINITY_DN3344_c2_g2(-1.079842823…
GO:0055085	transmembrane transport	biological process	36/234	94/681	0.22591	1	TRINITY_DN1269_c0_g1(-2.69702190868),TRINITY_DN1357_c0_g1(-2.55339730538),TRINITY_DN1373_c0_g1(-2.06665804542),TRINITY_DN1903_c0_g1(-1.0299931519),TRINITY_DN2198_c0_g1(1.02592882666),TRINITY_DN2539_c0_g1(-1.81563107104),TRINITY_DN2642_c2_g4(2.69107002639),TRINITY_DN2674_c3_g2(-1.77339508967),TRINITY_DN2677_c1_g2(1.75084897723),TRINITY_DN2768_c3_g6(-1.36362015985),TRINITY_DN2823_c2_g4(-1.136394085…	TRINITY_DN1269_c0_g1(-2.69702190868),TRINITY_DN1357_c0_g1(-2.55339730538),TRINITY_DN1373_c0_g1(-2.06665804542),TRINITY_DN1903_c0_g1(-1.0299931519),TRINITY_DN2198_c0_g1(1.02592882666),TRINITY_DN2539_c0_g1(-1.81563107104),TRINITY_DN2642_c2_g4(2.69107002639),TRINITY_DN2674_c3_g2(-1.77339508967),TRINITY_DN2677_c1_g2(1.75084897723),TRINITY_DN2768_c3_g6(-1.36362015985),TRINITY_DN2823_c2_g4(-1.136394085…
GO:0007389	pattern specification process	biological process	7/234	15/681	0.2263	1	TRINITY_DN1551_c0_g1(-2.62773240149),TRINITY_DN2244_c0_g1(-2.14833104305),TRINITY_DN2656_c0_g2(-4.58846026162),TRINITY_DN2670_c0_g1(-1.16807489944),TRINITY_DN2990_c3_g1(4.48637222765),TRINITY_DN3071_c0_g4(-1.25105018748),TRINITY_DN311_c0_g1(-3.06936398231)	TRINITY_DN1551_c0_g1(-2.62773240149),TRINITY_DN2244_c0_g1(-2.14833104305),TRINITY_DN2656_c0_g2(-4.58846026162),TRINITY_DN2670_c0_g1(-1.16807489944),TRINITY_DN2990_c3_g1(4.48637222765),TRINITY_DN3071_c0_g4(-1.25105018748),TRINITY_DN311_c0_g1(-3.06936398231)
GO:0032880	regulation of protein localization	biological process	7/234	15/681	0.2263	1	TRINITY_DN1453_c0_g1(-2.82693098456),TRINITY_DN2618_c2_g3(1.16746035949),TRINITY_DN2990_c3_g1(4.48637222765),TRINITY_DN3032_c1_g3(-1.81290474391),TRINITY_DN3512_c0_g2(-1.87901474245),TRINITY_DN3656_c1_g1(-2.08721167236),TRINITY_DN3656_c1_g5(-3.02684114829)	TRINITY_DN1453_c0_g1(-2.82693098456),TRINITY_DN2618_c2_g3(1.16746035949),TRINITY_DN2990_c3_g1(4.48637222765),TRINITY_DN3032_c1_g3(-1.81290474391),TRINITY_DN3512_c0_g2(-1.87901474245),TRINITY_DN3656_c1_g1(-2.08721167236),TRINITY_DN3656_c1_g5(-3.02684114829)
GO:0006820	anion transport	biological process	16/234	39/681	0.23087	1	TRINITY_DN1269_c0_g1(-2.69702190868),TRINITY_DN1373_c0_g1(-2.06665804542),TRINITY_DN2198_c0_g1(1.02592882666),TRINITY_DN2823_c2_g4(-1.13639408501),TRINITY_DN2848_c1_g1(1.48364203419),TRINITY_DN2981_c1_g1(-1.28653934136),TRINITY_DN2991_c6_g5(-1.00335109421),TRINITY_DN3217_c0_g1(-4.26414724998),TRINITY_DN3217_c0_g2(-14.4886184371),TRINITY_DN3324_c1_g1(-1.19910771168),TRINITY_DN3343_c1_g7(1.11505558…	TRINITY_DN1269_c0_g1(-2.69702190868),TRINITY_DN1373_c0_g1(-2.06665804542),TRINITY_DN2198_c0_g1(1.02592882666),TRINITY_DN2823_c2_g4(-1.13639408501),TRINITY_DN2848_c1_g1(1.48364203419),TRINITY_DN2981_c1_g1(-1.28653934136),TRINITY_DN2991_c6_g5(-1.00335109421),TRINITY_DN3217_c0_g1(-4.26414724998),TRINITY_DN3217_c0_g2(-14.4886184371),TRINITY_DN3324_c1_g1(-1.19910771168),TRINITY_DN3343_c1_g7(1.11505558…
GO:0000723	telomere maintenance	biological process	5/234	10/681	0.23322	1	TRINITY_DN1268_c0_g1(-2.06811775799),TRINITY_DN3160_c3_g6(1.13017127252),TRINITY_DN3311_c1_g2(-1.13281740221),TRINITY_DN3569_c7_g1(-1.71456957864),TRINITY_DN3593_c3_g1(-1.127844984)	TRINITY_DN1268_c0_g1(-2.06811775799),TRINITY_DN3160_c3_g6(1.13017127252),TRINITY_DN3311_c1_g2(-1.13281740221),TRINITY_DN3569_c7_g1(-1.71456957864),TRINITY_DN3593_c3_g1(-1.127844984)
GO:0006733	oxidoreduction coenzyme metabolic process	biological process	5/234	10/681	0.23322	1	TRINITY_DN2378_c0_g1(-2.74436306224),TRINITY_DN3327_c4_g1(-1.07113224816),TRINITY_DN3569_c5_g1(-2.53028689894),TRINITY_DN767_c0_g1(-1.4406680883),TRINITY_DN877_c0_g2(-2.38734682685)	TRINITY_DN2378_c0_g1(-2.74436306224),TRINITY_DN3327_c4_g1(-1.07113224816),TRINITY_DN3569_c5_g1(-2.53028689894),TRINITY_DN767_c0_g1(-1.4406680883),TRINITY_DN877_c0_g2(-2.38734682685)
GO:0014074	response to purine-containing compound	biological process	5/234	10/681	0.23322	1	TRINITY_DN1357_c0_g1(-2.55339730538),TRINITY_DN2677_c1_g2(1.75084897723),TRINITY_DN2991_c1_g2(-1.38723740444),TRINITY_DN3130_c0_g1(-1.11371794823),TRINITY_DN3757_c3_g4(2.45866702157)	TRINITY_DN1357_c0_g1(-2.55339730538),TRINITY_DN2677_c1_g2(1.75084897723),TRINITY_DN2991_c1_g2(-1.38723740444),TRINITY_DN3130_c0_g1(-1.11371794823),TRINITY_DN3757_c3_g4(2.45866702157)
GO:0016485	protein processing	biological process	5/234	10/681	0.23322	1	TRINITY_DN1896_c0_g1(-1.43122376696),TRINITY_DN2863_c0_g2(-1.17670982061),TRINITY_DN2990_c3_g1(4.48637222765),TRINITY_DN3071_c0_g4(-1.25105018748),TRINITY_DN3160_c3_g6(1.13017127252)	TRINITY_DN1896_c0_g1(-1.43122376696),TRINITY_DN2863_c0_g2(-1.17670982061),TRINITY_DN2990_c3_g1(4.48637222765),TRINITY_DN3071_c0_g4(-1.25105018748),TRINITY_DN3160_c3_g6(1.13017127252)
GO:0032200	telomere organization	biological process	5/234	10/681	0.23322	1	TRINITY_DN1268_c0_g1(-2.06811775799),TRINITY_DN3160_c3_g6(1.13017127252),TRINITY_DN3311_c1_g2(-1.13281740221),TRINITY_DN3569_c7_g1(-1.71456957864),TRINITY_DN3593_c3_g1(-1.127844984)	TRINITY_DN1268_c0_g1(-2.06811775799),TRINITY_DN3160_c3_g6(1.13017127252),TRINITY_DN3311_c1_g2(-1.13281740221),TRINITY_DN3569_c7_g1(-1.71456957864),TRINITY_DN3593_c3_g1(-1.127844984)
GO:0045930	negative regulation of mitotic cell cycle	biological process	5/234	10/681	0.23322	1	TRINITY_DN1577_c0_g1(-1.27109622825),TRINITY_DN3135_c2_g3(1.84163748525),TRINITY_DN3238_c1_g1(4.68706194956),TRINITY_DN3285_c2_g1(-1.58640393684),TRINITY_DN3355_c2_g2(-1.83919966724)	TRINITY_DN1577_c0_g1(-1.27109622825),TRINITY_DN3135_c2_g3(1.84163748525),TRINITY_DN3238_c1_g1(4.68706194956),TRINITY_DN3285_c2_g1(-1.58640393684),TRINITY_DN3355_c2_g2(-1.83919966724)
GO:0046683	response to organophosphorus	biological process	5/234	10/681	0.23322	1	TRINITY_DN1357_c0_g1(-2.55339730538),TRINITY_DN2677_c1_g2(1.75084897723),TRINITY_DN2991_c1_g2(-1.38723740444),TRINITY_DN3130_c0_g1(-1.11371794823),TRINITY_DN3757_c3_g4(2.45866702157)	TRINITY_DN1357_c0_g1(-2.55339730538),TRINITY_DN2677_c1_g2(1.75084897723),TRINITY_DN2991_c1_g2(-1.38723740444),TRINITY_DN3130_c0_g1(-1.11371794823),TRINITY_DN3757_c3_g4(2.45866702157)
GO:0051051	negative regulation of transport	biological process	5/234	10/681	0.23322	1	TRINITY_DN1453_c0_g1(-2.82693098456),TRINITY_DN2618_c2_g3(1.16746035949),TRINITY_DN3512_c0_g2(-1.87901474245),TRINITY_DN3656_c1_g1(-2.08721167236),TRINITY_DN3656_c1_g5(-3.02684114829)	TRINITY_DN1453_c0_g1(-2.82693098456),TRINITY_DN2618_c2_g3(1.16746035949),TRINITY_DN3512_c0_g2(-1.87901474245),TRINITY_DN3656_c1_g1(-2.08721167236),TRINITY_DN3656_c1_g5(-3.02684114829)
GO:0051591	response to cAMP	biological process	5/234	10/681	0.23322	1	TRINITY_DN1357_c0_g1(-2.55339730538),TRINITY_DN2677_c1_g2(1.75084897723),TRINITY_DN2991_c1_g2(-1.38723740444),TRINITY_DN3130_c0_g1(-1.11371794823),TRINITY_DN3757_c3_g4(2.45866702157)	TRINITY_DN1357_c0_g1(-2.55339730538),TRINITY_DN2677_c1_g2(1.75084897723),TRINITY_DN2991_c1_g2(-1.38723740444),TRINITY_DN3130_c0_g1(-1.11371794823),TRINITY_DN3757_c3_g4(2.45866702157)
GO:0006259	DNA metabolic process	biological process	20/234	50/681	0.23459	1	TRINITY_DN1268_c0_g1(-2.06811775799),TRINITY_DN1577_c0_g1(-1.27109622825),TRINITY_DN1914_c0_g1(-1.41718553061),TRINITY_DN2576_c0_g2(-1.04508082347),TRINITY_DN2834_c2_g1(-1.88177373969),TRINITY_DN2880_c5_g2(-1.41891648753),TRINITY_DN2894_c1_g4(-1.13651404581),TRINITY_DN2986_c3_g1(-1.95868262638),TRINITY_DN3003_c0_g1(-1.38606041139),TRINITY_DN3034_c3_g2(-2.78869539746),TRINITY_DN3160_c3_g6(1.130171…	TRINITY_DN1268_c0_g1(-2.06811775799),TRINITY_DN1577_c0_g1(-1.27109622825),TRINITY_DN1914_c0_g1(-1.41718553061),TRINITY_DN2576_c0_g2(-1.04508082347),TRINITY_DN2834_c2_g1(-1.88177373969),TRINITY_DN2880_c5_g2(-1.41891648753),TRINITY_DN2894_c1_g4(-1.13651404581),TRINITY_DN2986_c3_g1(-1.95868262638),TRINITY_DN3003_c0_g1(-1.38606041139),TRINITY_DN3034_c3_g2(-2.78869539746),TRINITY_DN3160_c3_g6(1.130171…
GO:0019953	sexual reproduction	biological process	13/234	31/681	0.23463	1	TRINITY_DN1577_c0_g1(-1.27109622825),TRINITY_DN2521_c4_g1(-2.61442070653),TRINITY_DN2576_c0_g2(-1.04508082347),TRINITY_DN2948_c3_g2(-1.25152991183),TRINITY_DN2986_c3_g1(-1.95868262638),TRINITY_DN2990_c3_g1(4.48637222765),TRINITY_DN3160_c3_g6(1.13017127252),TRINITY_DN3282_c0_g4(1.20593803666),TRINITY_DN3344_c2_g2(-1.07984282302),TRINITY_DN3416_c0_g3(-1.06697066005),TRINITY_DN3466_c5_g2(-1.56168631…	TRINITY_DN1577_c0_g1(-1.27109622825),TRINITY_DN2521_c4_g1(-2.61442070653),TRINITY_DN2576_c0_g2(-1.04508082347),TRINITY_DN2948_c3_g2(-1.25152991183),TRINITY_DN2986_c3_g1(-1.95868262638),TRINITY_DN2990_c3_g1(4.48637222765),TRINITY_DN3160_c3_g6(1.13017127252),TRINITY_DN3282_c0_g4(1.20593803666),TRINITY_DN3344_c2_g2(-1.07984282302),TRINITY_DN3416_c0_g3(-1.06697066005),TRINITY_DN3466_c5_g2(-1.56168631…
GO:0032504	multicellular organism reproduction	biological process	13/234	31/681	0.23463	1	TRINITY_DN1577_c0_g1(-1.27109622825),TRINITY_DN2521_c4_g1(-2.61442070653),TRINITY_DN2576_c0_g2(-1.04508082347),TRINITY_DN2948_c3_g2(-1.25152991183),TRINITY_DN2986_c3_g1(-1.95868262638),TRINITY_DN2990_c3_g1(4.48637222765),TRINITY_DN3160_c3_g6(1.13017127252),TRINITY_DN3282_c0_g4(1.20593803666),TRINITY_DN3344_c2_g2(-1.07984282302),TRINITY_DN3416_c0_g3(-1.06697066005),TRINITY_DN3466_c5_g2(-1.56168631…	TRINITY_DN1577_c0_g1(-1.27109622825),TRINITY_DN2521_c4_g1(-2.61442070653),TRINITY_DN2576_c0_g2(-1.04508082347),TRINITY_DN2948_c3_g2(-1.25152991183),TRINITY_DN2986_c3_g1(-1.95868262638),TRINITY_DN2990_c3_g1(4.48637222765),TRINITY_DN3160_c3_g6(1.13017127252),TRINITY_DN3282_c0_g4(1.20593803666),TRINITY_DN3344_c2_g2(-1.07984282302),TRINITY_DN3416_c0_g3(-1.06697066005),TRINITY_DN3466_c5_g2(-1.56168631…
GO:0044703	multi-organism reproductive process	biological process	13/234	31/681	0.23463	1	TRINITY_DN1577_c0_g1(-1.27109622825),TRINITY_DN2521_c4_g1(-2.61442070653),TRINITY_DN2576_c0_g2(-1.04508082347),TRINITY_DN2948_c3_g2(-1.25152991183),TRINITY_DN2986_c3_g1(-1.95868262638),TRINITY_DN2990_c3_g1(4.48637222765),TRINITY_DN3160_c3_g6(1.13017127252),TRINITY_DN3282_c0_g4(1.20593803666),TRINITY_DN3344_c2_g2(-1.07984282302),TRINITY_DN3416_c0_g3(-1.06697066005),TRINITY_DN3466_c5_g2(-1.56168631…	TRINITY_DN1577_c0_g1(-1.27109622825),TRINITY_DN2521_c4_g1(-2.61442070653),TRINITY_DN2576_c0_g2(-1.04508082347),TRINITY_DN2948_c3_g2(-1.25152991183),TRINITY_DN2986_c3_g1(-1.95868262638),TRINITY_DN2990_c3_g1(4.48637222765),TRINITY_DN3160_c3_g6(1.13017127252),TRINITY_DN3282_c0_g4(1.20593803666),TRINITY_DN3344_c2_g2(-1.07984282302),TRINITY_DN3416_c0_g3(-1.06697066005),TRINITY_DN3466_c5_g2(-1.56168631…
GO:0031668	cellular response to extracellular stimulus	biological process	10/234	23/681	0.23481	1	TRINITY_DN2618_c2_g3(1.16746035949),TRINITY_DN2948_c3_g2(-1.25152991183),TRINITY_DN3311_c1_g2(-1.13281740221),TRINITY_DN3344_c2_g2(-1.07984282302),TRINITY_DN3416_c0_g3(-1.06697066005),TRINITY_DN3502_c0_g1(-1.23001299537),TRINITY_DN3512_c0_g2(-1.87901474245),TRINITY_DN3520_c4_g1(1.22629129786),TRINITY_DN3656_c1_g1(-2.08721167236),TRINITY_DN3656_c1_g5(-3.02684114829)	TRINITY_DN2618_c2_g3(1.16746035949),TRINITY_DN2948_c3_g2(-1.25152991183),TRINITY_DN3311_c1_g2(-1.13281740221),TRINITY_DN3344_c2_g2(-1.07984282302),TRINITY_DN3416_c0_g3(-1.06697066005),TRINITY_DN3502_c0_g1(-1.23001299537),TRINITY_DN3512_c0_g2(-1.87901474245),TRINITY_DN3520_c4_g1(1.22629129786),TRINITY_DN3656_c1_g1(-2.08721167236),TRINITY_DN3656_c1_g5(-3.02684114829)
GO:0071496	cellular response to external stimulus	biological process	10/234	23/681	0.23481	1	TRINITY_DN2618_c2_g3(1.16746035949),TRINITY_DN2948_c3_g2(-1.25152991183),TRINITY_DN3311_c1_g2(-1.13281740221),TRINITY_DN3344_c2_g2(-1.07984282302),TRINITY_DN3416_c0_g3(-1.06697066005),TRINITY_DN3502_c0_g1(-1.23001299537),TRINITY_DN3512_c0_g2(-1.87901474245),TRINITY_DN3520_c4_g1(1.22629129786),TRINITY_DN3656_c1_g1(-2.08721167236),TRINITY_DN3656_c1_g5(-3.02684114829)	TRINITY_DN2618_c2_g3(1.16746035949),TRINITY_DN2948_c3_g2(-1.25152991183),TRINITY_DN3311_c1_g2(-1.13281740221),TRINITY_DN3344_c2_g2(-1.07984282302),TRINITY_DN3416_c0_g3(-1.06697066005),TRINITY_DN3502_c0_g1(-1.23001299537),TRINITY_DN3512_c0_g2(-1.87901474245),TRINITY_DN3520_c4_g1(1.22629129786),TRINITY_DN3656_c1_g1(-2.08721167236),TRINITY_DN3656_c1_g5(-3.02684114829)
GO:0009719	response to endogenous stimulus	biological process	29/234	75/681	0.23933	1	TRINITY_DN1357_c0_g1(-2.55339730538),TRINITY_DN1383_c0_g2(-5.09453204951),TRINITY_DN1494_c0_g1(-2.19265717403),TRINITY_DN1896_c0_g1(-1.43122376696),TRINITY_DN2522_c0_g1(1.71353669634),TRINITY_DN2638_c4_g1(-1.94308971346),TRINITY_DN2638_c4_g3(-1.69613457802),TRINITY_DN2670_c2_g6(-1.02619526061),TRINITY_DN2677_c1_g2(1.75084897723),TRINITY_DN2727_c2_g2(2.80700894859),TRINITY_DN2854_c3_g4(-1.03193046…	TRINITY_DN1357_c0_g1(-2.55339730538),TRINITY_DN1383_c0_g2(-5.09453204951),TRINITY_DN1494_c0_g1(-2.19265717403),TRINITY_DN1896_c0_g1(-1.43122376696),TRINITY_DN2522_c0_g1(1.71353669634),TRINITY_DN2638_c4_g1(-1.94308971346),TRINITY_DN2638_c4_g3(-1.69613457802),TRINITY_DN2670_c2_g6(-1.02619526061),TRINITY_DN2677_c1_g2(1.75084897723),TRINITY_DN2727_c2_g2(2.80700894859),TRINITY_DN2854_c3_g4(-1.03193046…
GO:0042742	defense response to bacterium	biological process	8/234	18/681	0.2501	1	TRINITY_DN1453_c0_g1(-2.82693098456),TRINITY_DN2522_c0_g1(1.71353669634),TRINITY_DN2638_c4_g1(-1.94308971346),TRINITY_DN2638_c4_g3(-1.69613457802),TRINITY_DN2670_c2_g4(-1.43011048969),TRINITY_DN3243_c2_g4(1.8219994837),TRINITY_DN3667_c3_g3(-1.03216184042),TRINITY_DN886_c0_g1(3.44157379396)	TRINITY_DN1453_c0_g1(-2.82693098456),TRINITY_DN2522_c0_g1(1.71353669634),TRINITY_DN2638_c4_g1(-1.94308971346),TRINITY_DN2638_c4_g3(-1.69613457802),TRINITY_DN2670_c2_g4(-1.43011048969),TRINITY_DN3243_c2_g4(1.8219994837),TRINITY_DN3667_c3_g3(-1.03216184042),TRINITY_DN886_c0_g1(3.44157379396)
GO:0006281	DNA repair	biological process	11/234	26/681	0.25142	1	TRINITY_DN1268_c0_g1(-2.06811775799),TRINITY_DN1914_c0_g1(-1.41718553061),TRINITY_DN2576_c0_g2(-1.04508082347),TRINITY_DN2834_c2_g1(-1.88177373969),TRINITY_DN2894_c1_g4(-1.13651404581),TRINITY_DN3003_c0_g1(-1.38606041139),TRINITY_DN3285_c2_g1(-1.58640393684),TRINITY_DN3311_c1_g2(-1.13281740221),TRINITY_DN3368_c3_g4(-1.07708134491),TRINITY_DN3466_c5_g2(-1.56168631845),TRINITY_DN3526_c2_g2(1.755411…	TRINITY_DN1268_c0_g1(-2.06811775799),TRINITY_DN1914_c0_g1(-1.41718553061),TRINITY_DN2576_c0_g2(-1.04508082347),TRINITY_DN2834_c2_g1(-1.88177373969),TRINITY_DN2894_c1_g4(-1.13651404581),TRINITY_DN3003_c0_g1(-1.38606041139),TRINITY_DN3285_c2_g1(-1.58640393684),TRINITY_DN3311_c1_g2(-1.13281740221),TRINITY_DN3368_c3_g4(-1.07708134491),TRINITY_DN3466_c5_g2(-1.56168631845),TRINITY_DN3526_c2_g2(1.755411…
GO:0030030	cell projection organization	biological process	11/234	26/681	0.25142	1	TRINITY_DN109_c0_g1(-2.43108989434),TRINITY_DN1245_c0_g2(-3.43593361414),TRINITY_DN1483_c0_g1(-2.10294444973),TRINITY_DN1551_c0_g1(-2.62773240149),TRINITY_DN2656_c0_g2(-4.58846026162),TRINITY_DN2990_c3_g1(4.48637222765),TRINITY_DN3032_c1_g3(-1.81290474391),TRINITY_DN311_c0_g1(-3.06936398231),TRINITY_DN3282_c0_g4(1.20593803666),TRINITY_DN3526_c2_g3(-3.28668474605),TRINITY_DN99_c0_g1(-1.6657118923)	TRINITY_DN109_c0_g1(-2.43108989434),TRINITY_DN1245_c0_g2(-3.43593361414),TRINITY_DN1483_c0_g1(-2.10294444973),TRINITY_DN1551_c0_g1(-2.62773240149),TRINITY_DN2656_c0_g2(-4.58846026162),TRINITY_DN2990_c3_g1(4.48637222765),TRINITY_DN3032_c1_g3(-1.81290474391),TRINITY_DN311_c0_g1(-3.06936398231),TRINITY_DN3282_c0_g4(1.20593803666),TRINITY_DN3526_c2_g3(-3.28668474605),TRINITY_DN99_c0_g1(-1.6657118923)
GO:0006468	protein phosphorylation	biological process	15/234	37/681	0.25942	1	TRINITY_DN1551_c0_g1(-2.62773240149),TRINITY_DN2618_c2_g3(1.16746035949),TRINITY_DN2638_c4_g1(-1.94308971346),TRINITY_DN2638_c4_g3(-1.69613457802),TRINITY_DN3030_c0_g5(-1.81942673788),TRINITY_DN3135_c2_g3(1.84163748525),TRINITY_DN3238_c1_g1(4.68706194956),TRINITY_DN3243_c2_g4(1.8219994837),TRINITY_DN3324_c1_g1(-1.19910771168),TRINITY_DN3355_c2_g2(-1.83919966724),TRINITY_DN3512_c0_g2(-1.8790147424…	TRINITY_DN1551_c0_g1(-2.62773240149),TRINITY_DN2618_c2_g3(1.16746035949),TRINITY_DN2638_c4_g1(-1.94308971346),TRINITY_DN2638_c4_g3(-1.69613457802),TRINITY_DN3030_c0_g5(-1.81942673788),TRINITY_DN3135_c2_g3(1.84163748525),TRINITY_DN3238_c1_g1(4.68706194956),TRINITY_DN3243_c2_g4(1.8219994837),TRINITY_DN3324_c1_g1(-1.19910771168),TRINITY_DN3355_c2_g2(-1.83919966724),TRINITY_DN3512_c0_g2(-1.8790147424…
GO:0007059	chromosome segregation	biological process	6/234	13/681	0.26568	1	TRINITY_DN2674_c3_g1(-1.20247600187),TRINITY_DN2830_c1_g6(-2.81950059698),TRINITY_DN2986_c3_g1(-1.95868262638),TRINITY_DN3368_c3_g3(-1.35865189413),TRINITY_DN3522_c0_g5(-1.94485287609),TRINITY_DN3688_c1_g7(-2.38640377363)	TRINITY_DN2674_c3_g1(-1.20247600187),TRINITY_DN2830_c1_g6(-2.81950059698),TRINITY_DN2986_c3_g1(-1.95868262638),TRINITY_DN3368_c3_g3(-1.35865189413),TRINITY_DN3522_c0_g5(-1.94485287609),TRINITY_DN3688_c1_g7(-2.38640377363)
GO:0044403	symbiont process	biological process	6/234	13/681	0.26568	1	TRINITY_DN2618_c2_g3(1.16746035949),TRINITY_DN2782_c0_g6(1.65399754879),TRINITY_DN3020_c4_g1(-1.1057580358),TRINITY_DN3512_c0_g2(-1.87901474245),TRINITY_DN3656_c1_g1(-2.08721167236),TRINITY_DN3656_c1_g5(-3.02684114829)	TRINITY_DN2618_c2_g3(1.16746035949),TRINITY_DN2782_c0_g6(1.65399754879),TRINITY_DN3020_c4_g1(-1.1057580358),TRINITY_DN3512_c0_g2(-1.87901474245),TRINITY_DN3656_c1_g1(-2.08721167236),TRINITY_DN3656_c1_g5(-3.02684114829)
GO:0044248	cellular catabolic process	biological process	39/234	104/681	0.26603	1	TRINITY_DN1427_c0_g1(-2.09599714025),TRINITY_DN1445_c0_g1(-3.12136795106),TRINITY_DN1568_c0_g1(-1.33754060427),TRINITY_DN2301_c0_g1(2.37287805567),TRINITY_DN2481_c5_g1(-1.72793019786),TRINITY_DN2670_c2_g6(-1.02619526061),TRINITY_DN2713_c2_g2(-1.10006926738),TRINITY_DN2713_c2_g4(-1.53848907314),TRINITY_DN2783_c0_g1(-2.27941690147),TRINITY_DN2783_c1_g1(-1.61743360107),TRINITY_DN2783_c1_g3(-1.170435…	TRINITY_DN1427_c0_g1(-2.09599714025),TRINITY_DN1445_c0_g1(-3.12136795106),TRINITY_DN1568_c0_g1(-1.33754060427),TRINITY_DN2301_c0_g1(2.37287805567),TRINITY_DN2481_c5_g1(-1.72793019786),TRINITY_DN2670_c2_g6(-1.02619526061),TRINITY_DN2713_c2_g2(-1.10006926738),TRINITY_DN2713_c2_g4(-1.53848907314),TRINITY_DN2783_c0_g1(-2.27941690147),TRINITY_DN2783_c1_g1(-1.61743360107),TRINITY_DN2783_c1_g3(-1.170435…
GO:0080134	regulation of response to stress	biological process	12/234	29/681	0.26612	1	TRINITY_DN2618_c2_g3(1.16746035949),TRINITY_DN2670_c2_g4(-1.43011048969),TRINITY_DN2863_c0_g2(-1.17670982061),TRINITY_DN3135_c2_g3(1.84163748525),TRINITY_DN3238_c1_g1(4.68706194956),TRINITY_DN3324_c1_g1(-1.19910771168),TRINITY_DN3355_c2_g2(-1.83919966724),TRINITY_DN3405_c2_g4(1.31430881022),TRINITY_DN3512_c0_g2(-1.87901474245),TRINITY_DN3656_c1_g1(-2.08721167236),TRINITY_DN3656_c1_g5(-3.026841148…	TRINITY_DN2618_c2_g3(1.16746035949),TRINITY_DN2670_c2_g4(-1.43011048969),TRINITY_DN2863_c0_g2(-1.17670982061),TRINITY_DN3135_c2_g3(1.84163748525),TRINITY_DN3238_c1_g1(4.68706194956),TRINITY_DN3324_c1_g1(-1.19910771168),TRINITY_DN3355_c2_g2(-1.83919966724),TRINITY_DN3405_c2_g4(1.31430881022),TRINITY_DN3512_c0_g2(-1.87901474245),TRINITY_DN3656_c1_g1(-2.08721167236),TRINITY_DN3656_c1_g5(-3.026841148…
GO:0000041	transition metal ion transport	biological process	2/234	3/681	0.27276	1	TRINITY_DN3141_c1_g4(-1.27569617362),TRINITY_DN3455_c5_g4(-1.38140557462)	TRINITY_DN3141_c1_g4(-1.27569617362),TRINITY_DN3455_c5_g4(-1.38140557462)
GO:0000578	embryonic axis specification	biological process	2/234	3/681	0.27276	1	TRINITY_DN1551_c0_g1(-2.62773240149),TRINITY_DN2990_c3_g1(4.48637222765)	TRINITY_DN1551_c0_g1(-2.62773240149),TRINITY_DN2990_c3_g1(4.48637222765)
GO:0000731	DNA synthesis involved in DNA repair	biological process	2/234	3/681	0.27276	1	TRINITY_DN3311_c1_g2(-1.13281740221),TRINITY_DN3368_c3_g4(-1.07708134491)	TRINITY_DN3311_c1_g2(-1.13281740221),TRINITY_DN3368_c3_g4(-1.07708134491)
GO:0002062	chondrocyte differentiation	biological process	2/234	3/681	0.27276	1	TRINITY_DN1896_c0_g1(-1.43122376696),TRINITY_DN2990_c3_g1(4.48637222765)	TRINITY_DN1896_c0_g1(-1.43122376696),TRINITY_DN2990_c3_g1(4.48637222765)
GO:0003007	heart morphogenesis	biological process	2/234	3/681	0.27276	1	TRINITY_DN1551_c0_g1(-2.62773240149),TRINITY_DN2990_c3_g1(4.48637222765)	TRINITY_DN1551_c0_g1(-2.62773240149),TRINITY_DN2990_c3_g1(4.48637222765)
GO:0006120	mitochondrial electron transport, NADH to ubiquinone	biological process	2/234	3/681	0.27276	1	TRINITY_DN2512_c2_g5(-3.78741905927),TRINITY_DN877_c0_g2(-2.38734682685)	TRINITY_DN2512_c2_g5(-3.78741905927),TRINITY_DN877_c0_g2(-2.38734682685)
GO:0006476	protein deacetylation	biological process	2/234	3/681	0.27276	1	TRINITY_DN1267_c0_g1(-3.74317437745),TRINITY_DN3034_c4_g1(-2.34785465768)	TRINITY_DN1267_c0_g1(-3.74317437745),TRINITY_DN3034_c4_g1(-2.34785465768)
GO:0006687	glycosphingolipid metabolic process	biological process	2/234	3/681	0.27276	1	TRINITY_DN2244_c0_g1(-2.14833104305),TRINITY_DN2670_c0_g1(-1.16807489944)	TRINITY_DN2244_c0_g1(-2.14833104305),TRINITY_DN2670_c0_g1(-1.16807489944)
GO:0006688	glycosphingolipid biosynthetic process	biological process	2/234	3/681	0.27276	1	TRINITY_DN2244_c0_g1(-2.14833104305),TRINITY_DN2670_c0_g1(-1.16807489944)	TRINITY_DN2244_c0_g1(-2.14833104305),TRINITY_DN2670_c0_g1(-1.16807489944)
GO:0006898	receptor-mediated endocytosis	biological process	2/234	3/681	0.27276	1	TRINITY_DN1453_c0_g1(-2.82693098456),TRINITY_DN2559_c3_g1(-1.41187808043)	TRINITY_DN1453_c0_g1(-2.82693098456),TRINITY_DN2559_c3_g1(-1.41187808043)
GO:0007044	cell-substrate junction assembly	biological process	2/234	3/681	0.27276	1	TRINITY_DN3113_c1_g12(-1.31724482175),TRINITY_DN3629_c0_g1(-1.0197644295)	TRINITY_DN3113_c1_g12(-1.31724482175),TRINITY_DN3629_c0_g1(-1.0197644295)
GO:0007365	periodic partitioning	biological process	2/234	3/681	0.27276	1	TRINITY_DN2990_c3_g1(4.48637222765),TRINITY_DN3071_c0_g4(-1.25105018748)	TRINITY_DN2990_c3_g1(4.48637222765),TRINITY_DN3071_c0_g4(-1.25105018748)
GO:0007367	segment polarity determination	biological process	2/234	3/681	0.27276	1	TRINITY_DN2990_c3_g1(4.48637222765),TRINITY_DN3071_c0_g4(-1.25105018748)	TRINITY_DN2990_c3_g1(4.48637222765),TRINITY_DN3071_c0_g4(-1.25105018748)
GO:0008156	negative regulation of DNA replication	biological process	2/234	3/681	0.27276	1	TRINITY_DN1577_c0_g1(-1.27109622825),TRINITY_DN2834_c2_g1(-1.88177373969)	TRINITY_DN1577_c0_g1(-1.27109622825),TRINITY_DN2834_c2_g1(-1.88177373969)
GO:0008361	regulation of cell size	biological process	2/234	3/681	0.27276	1	TRINITY_DN3034_c3_g2(-2.78869539746),TRINITY_DN3343_c1_g7(1.11505558557)	TRINITY_DN3034_c3_g2(-2.78869539746),TRINITY_DN3343_c1_g7(1.11505558557)
GO:0009798	axis specification	biological process	2/234	3/681	0.27276	1	TRINITY_DN1551_c0_g1(-2.62773240149),TRINITY_DN2990_c3_g1(4.48637222765)	TRINITY_DN1551_c0_g1(-2.62773240149),TRINITY_DN2990_c3_g1(4.48637222765)
GO:0009860	pollen tube growth	biological process	2/234	3/681	0.27276	1	TRINITY_DN2767_c3_g3(-1.67248354228),TRINITY_DN3324_c1_g1(-1.19910771168)	TRINITY_DN2767_c3_g3(-1.67248354228),TRINITY_DN3324_c1_g1(-1.19910771168)
GO:0009932	cell tip growth	biological process	2/234	3/681	0.27276	1	TRINITY_DN2767_c3_g3(-1.67248354228),TRINITY_DN3324_c1_g1(-1.19910771168)	TRINITY_DN2767_c3_g3(-1.67248354228),TRINITY_DN3324_c1_g1(-1.19910771168)
GO:0010410	hemicellulose metabolic process	biological process	2/234	3/681	0.27276	1	TRINITY_DN3158_c1_g1(-2.93602217915),TRINITY_DN3722_c1_g7(-2.33487818804)	TRINITY_DN3158_c1_g1(-2.93602217915),TRINITY_DN3722_c1_g7(-2.33487818804)
GO:0010955	negative regulation of protein processing	biological process	2/234	3/681	0.27276	1	TRINITY_DN1896_c0_g1(-1.43122376696),TRINITY_DN2863_c0_g2(-1.17670982061)	TRINITY_DN1896_c0_g1(-1.43122376696),TRINITY_DN2863_c0_g2(-1.17670982061)
GO:0010972	negative regulation of G2/M transition of mitotic cell cycle	biological process	2/234	3/681	0.27276	1	TRINITY_DN1577_c0_g1(-1.27109622825),TRINITY_DN3285_c2_g1(-1.58640393684)	TRINITY_DN1577_c0_g1(-1.27109622825),TRINITY_DN3285_c2_g1(-1.58640393684)
GO:0016197	endosomal transport	biological process	2/234	3/681	0.27276	1	TRINITY_DN2786_c2_g4(-1.88079518437),TRINITY_DN3580_c0_g1(-1.66708596092)	TRINITY_DN2786_c2_g4(-1.88079518437),TRINITY_DN3580_c0_g1(-1.66708596092)
GO:0031348	negative regulation of defense response	biological process	2/234	3/681	0.27276	1	TRINITY_DN2670_c2_g4(-1.43011048969),TRINITY_DN3667_c3_g3(-1.03216184042)	TRINITY_DN2670_c2_g4(-1.43011048969),TRINITY_DN3667_c3_g3(-1.03216184042)
GO:0032204	regulation of telomere maintenance	biological process	2/234	3/681	0.27276	1	TRINITY_DN1268_c0_g1(-2.06811775799),TRINITY_DN3593_c3_g1(-1.127844984)	TRINITY_DN1268_c0_g1(-2.06811775799),TRINITY_DN3593_c3_g1(-1.127844984)
GO:0032210	regulation of telomere maintenance via telomerase	biological process	2/234	3/681	0.27276	1	TRINITY_DN1268_c0_g1(-2.06811775799),TRINITY_DN3593_c3_g1(-1.127844984)	TRINITY_DN1268_c0_g1(-2.06811775799),TRINITY_DN3593_c3_g1(-1.127844984)
GO:0032436	positive regulation of proteasomal ubiquitin-dependent protein catabolic process	biological process	2/234	3/681	0.27276	1	TRINITY_DN2830_c1_g6(-2.81950059698),TRINITY_DN3688_c1_g7(-2.38640377363)	TRINITY_DN2830_c1_g6(-2.81950059698),TRINITY_DN3688_c1_g7(-2.38640377363)
GO:0032943	mononuclear cell proliferation	biological process	2/234	3/681	0.27276	1	TRINITY_DN2863_c0_g2(-1.17670982061),TRINITY_DN2990_c3_g1(4.48637222765)	TRINITY_DN2863_c0_g2(-1.17670982061),TRINITY_DN2990_c3_g1(4.48637222765)
GO:0032944	regulation of mononuclear cell proliferation	biological process	2/234	3/681	0.27276	1	TRINITY_DN2863_c0_g2(-1.17670982061),TRINITY_DN2990_c3_g1(4.48637222765)	TRINITY_DN2863_c0_g2(-1.17670982061),TRINITY_DN2990_c3_g1(4.48637222765)
GO:0033260	nuclear DNA replication	biological process	2/234	3/681	0.27276	1	TRINITY_DN1577_c0_g1(-1.27109622825),TRINITY_DN3172_c3_g4(-1.50849298535)	TRINITY_DN1577_c0_g1(-1.27109622825),TRINITY_DN3172_c3_g4(-1.50849298535)
GO:0034498	early endosome to Golgi transport	biological process	2/234	3/681	0.27276	1	TRINITY_DN2786_c2_g4(-1.88079518437),TRINITY_DN3580_c0_g1(-1.66708596092)	TRINITY_DN2786_c2_g4(-1.88079518437),TRINITY_DN3580_c0_g1(-1.66708596092)
GO:0035601	protein deacylation	biological process	2/234	3/681	0.27276	1	TRINITY_DN1267_c0_g1(-3.74317437745),TRINITY_DN3034_c4_g1(-2.34785465768)	TRINITY_DN1267_c0_g1(-3.74317437745),TRINITY_DN3034_c4_g1(-2.34785465768)
GO:0042023	DNA endoreduplication	biological process	2/234	3/681	0.27276	1	TRINITY_DN3034_c3_g2(-2.78869539746),TRINITY_DN3343_c1_g7(1.11505558557)	TRINITY_DN3034_c3_g2(-2.78869539746),TRINITY_DN3343_c1_g7(1.11505558557)
GO:0042051	compound eye photoreceptor development	biological process	2/234	3/681	0.27276	1	TRINITY_DN2244_c0_g1(-2.14833104305),TRINITY_DN2670_c0_g1(-1.16807489944)	TRINITY_DN2244_c0_g1(-2.14833104305),TRINITY_DN2670_c0_g1(-1.16807489944)
GO:0042098	T cell proliferation	biological process	2/234	3/681	0.27276	1	TRINITY_DN2863_c0_g2(-1.17670982061),TRINITY_DN2990_c3_g1(4.48637222765)	TRINITY_DN2863_c0_g2(-1.17670982061),TRINITY_DN2990_c3_g1(4.48637222765)
GO:0042129	regulation of T cell proliferation	biological process	2/234	3/681	0.27276	1	TRINITY_DN2863_c0_g2(-1.17670982061),TRINITY_DN2990_c3_g1(4.48637222765)	TRINITY_DN2863_c0_g2(-1.17670982061),TRINITY_DN2990_c3_g1(4.48637222765)
GO:0042147	retrograde transport, endosome to Golgi	biological process	2/234	3/681	0.27276	1	TRINITY_DN2786_c2_g4(-1.88079518437),TRINITY_DN3580_c0_g1(-1.66708596092)	TRINITY_DN2786_c2_g4(-1.88079518437),TRINITY_DN3580_c0_g1(-1.66708596092)
GO:0042462	eye photoreceptor cell development	biological process	2/234	3/681	0.27276	1	TRINITY_DN2244_c0_g1(-2.14833104305),TRINITY_DN2670_c0_g1(-1.16807489944)	TRINITY_DN2244_c0_g1(-2.14833104305),TRINITY_DN2670_c0_g1(-1.16807489944)
GO:0044773	mitotic DNA damage checkpoint	biological process	2/234	3/681	0.27276	1	TRINITY_DN1577_c0_g1(-1.27109622825),TRINITY_DN3285_c2_g1(-1.58640393684)	TRINITY_DN1577_c0_g1(-1.27109622825),TRINITY_DN3285_c2_g1(-1.58640393684)
GO:0044774	mitotic DNA integrity checkpoint	biological process	2/234	3/681	0.27276	1	TRINITY_DN1577_c0_g1(-1.27109622825),TRINITY_DN3285_c2_g1(-1.58640393684)	TRINITY_DN1577_c0_g1(-1.27109622825),TRINITY_DN3285_c2_g1(-1.58640393684)
GO:0044806	G-quadruplex DNA unwinding	biological process	2/234	3/681	0.27276	1	TRINITY_DN3311_c1_g2(-1.13281740221),TRINITY_DN3593_c3_g1(-1.127844984)	TRINITY_DN3311_c1_g2(-1.13281740221),TRINITY_DN3593_c3_g1(-1.127844984)
GO:0045491	xylan metabolic process	biological process	2/234	3/681	0.27276	1	TRINITY_DN3158_c1_g1(-2.93602217915),TRINITY_DN3722_c1_g7(-2.33487818804)	TRINITY_DN3158_c1_g1(-2.93602217915),TRINITY_DN3722_c1_g7(-2.33487818804)
GO:0045732	positive regulation of protein catabolic process	biological process	2/234	3/681	0.27276	1	TRINITY_DN2830_c1_g6(-2.81950059698),TRINITY_DN3688_c1_g7(-2.38640377363)	TRINITY_DN2830_c1_g6(-2.81950059698),TRINITY_DN3688_c1_g7(-2.38640377363)
GO:0045747	positive regulation of Notch signaling pathway	biological process	2/234	3/681	0.27276	1	TRINITY_DN2244_c0_g1(-2.14833104305),TRINITY_DN2670_c0_g1(-1.16807489944)	TRINITY_DN2244_c0_g1(-2.14833104305),TRINITY_DN2670_c0_g1(-1.16807489944)
GO:0045840	positive regulation of mitotic nuclear division	biological process	2/234	3/681	0.27276	1	TRINITY_DN2830_c1_g6(-2.81950059698),TRINITY_DN3688_c1_g7(-2.38640377363)	TRINITY_DN2830_c1_g6(-2.81950059698),TRINITY_DN3688_c1_g7(-2.38640377363)
GO:0045842	positive regulation of mitotic metaphase/anaphase transition	biological process	2/234	3/681	0.27276	1	TRINITY_DN2830_c1_g6(-2.81950059698),TRINITY_DN3688_c1_g7(-2.38640377363)	TRINITY_DN2830_c1_g6(-2.81950059698),TRINITY_DN3688_c1_g7(-2.38640377363)
GO:0045931	positive regulation of mitotic cell cycle	biological process	2/234	3/681	0.27276	1	TRINITY_DN2830_c1_g6(-2.81950059698),TRINITY_DN3688_c1_g7(-2.38640377363)	TRINITY_DN2830_c1_g6(-2.81950059698),TRINITY_DN3688_c1_g7(-2.38640377363)
GO:0046379	extracellular polysaccharide metabolic process	biological process	2/234	3/681	0.27276	1	TRINITY_DN2244_c0_g1(-2.14833104305),TRINITY_DN2670_c0_g1(-1.16807489944)	TRINITY_DN2244_c0_g1(-2.14833104305),TRINITY_DN2670_c0_g1(-1.16807489944)
GO:0046651	lymphocyte proliferation	biological process	2/234	3/681	0.27276	1	TRINITY_DN2863_c0_g2(-1.17670982061),TRINITY_DN2990_c3_g1(4.48637222765)	TRINITY_DN2863_c0_g2(-1.17670982061),TRINITY_DN2990_c3_g1(4.48637222765)
GO:0048562	embryonic organ morphogenesis	biological process	2/234	3/681	0.27276	1	TRINITY_DN1551_c0_g1(-2.62773240149),TRINITY_DN2990_c3_g1(4.48637222765)	TRINITY_DN1551_c0_g1(-2.62773240149),TRINITY_DN2990_c3_g1(4.48637222765)
GO:0048568	embryonic organ development	biological process	2/234	3/681	0.27276	1	TRINITY_DN1551_c0_g1(-2.62773240149),TRINITY_DN2990_c3_g1(4.48637222765)	TRINITY_DN1551_c0_g1(-2.62773240149),TRINITY_DN2990_c3_g1(4.48637222765)
GO:0048868	pollen tube development	biological process	2/234	3/681	0.27276	1	TRINITY_DN2767_c3_g3(-1.67248354228),TRINITY_DN3324_c1_g1(-1.19910771168)	TRINITY_DN2767_c3_g3(-1.67248354228),TRINITY_DN3324_c1_g1(-1.19910771168)
GO:0050670	regulation of lymphocyte proliferation	biological process	2/234	3/681	0.27276	1	TRINITY_DN2863_c0_g2(-1.17670982061),TRINITY_DN2990_c3_g1(4.48637222765)	TRINITY_DN2863_c0_g2(-1.17670982061),TRINITY_DN2990_c3_g1(4.48637222765)
GO:0051307	meiotic chromosome separation	biological process	2/234	3/681	0.27276	1	TRINITY_DN2674_c3_g1(-1.20247600187),TRINITY_DN2986_c3_g1(-1.95868262638)	TRINITY_DN2674_c3_g1(-1.20247600187),TRINITY_DN2986_c3_g1(-1.95868262638)
GO:0051785	positive regulation of nuclear division	biological process	2/234	3/681	0.27276	1	TRINITY_DN2830_c1_g6(-2.81950059698),TRINITY_DN3688_c1_g7(-2.38640377363)	TRINITY_DN2830_c1_g6(-2.81950059698),TRINITY_DN3688_c1_g7(-2.38640377363)
GO:0051972	regulation of telomerase activity	biological process	2/234	3/681	0.27276	1	TRINITY_DN1268_c0_g1(-2.06811775799),TRINITY_DN3593_c3_g1(-1.127844984)	TRINITY_DN1268_c0_g1(-2.06811775799),TRINITY_DN3593_c3_g1(-1.127844984)
GO:0060348	bone development	biological process	2/234	3/681	0.27276	1	TRINITY_DN1896_c0_g1(-1.43122376696),TRINITY_DN2990_c3_g1(4.48637222765)	TRINITY_DN1896_c0_g1(-1.43122376696),TRINITY_DN2990_c3_g1(4.48637222765)
GO:0060349	bone morphogenesis	biological process	2/234	3/681	0.27276	1	TRINITY_DN1896_c0_g1(-1.43122376696),TRINITY_DN2990_c3_g1(4.48637222765)	TRINITY_DN1896_c0_g1(-1.43122376696),TRINITY_DN2990_c3_g1(4.48637222765)
GO:0070613	regulation of protein processing	biological process	2/234	3/681	0.27276	1	TRINITY_DN1896_c0_g1(-1.43122376696),TRINITY_DN2863_c0_g2(-1.17670982061)	TRINITY_DN1896_c0_g1(-1.43122376696),TRINITY_DN2863_c0_g2(-1.17670982061)
GO:0070661	leukocyte proliferation	biological process	2/234	3/681	0.27276	1	TRINITY_DN2863_c0_g2(-1.17670982061),TRINITY_DN2990_c3_g1(4.48637222765)	TRINITY_DN2863_c0_g2(-1.17670982061),TRINITY_DN2990_c3_g1(4.48637222765)
GO:0070663	regulation of leukocyte proliferation	biological process	2/234	3/681	0.27276	1	TRINITY_DN2863_c0_g2(-1.17670982061),TRINITY_DN2990_c3_g1(4.48637222765)	TRINITY_DN2863_c0_g2(-1.17670982061),TRINITY_DN2990_c3_g1(4.48637222765)
GO:0070988	demethylation	biological process	2/234	3/681	0.27276	1	TRINITY_DN3034_c4_g1(-2.34785465768),TRINITY_DN3466_c5_g2(-1.56168631845)	TRINITY_DN3034_c4_g1(-2.34785465768),TRINITY_DN3466_c5_g2(-1.56168631845)
GO:0071241	cellular response to inorganic substance	biological process	2/234	3/681	0.27276	1	TRINITY_DN3455_c5_g4(-1.38140557462),TRINITY_DN3634_c5_g2(-1.43389994753)	TRINITY_DN3455_c5_g4(-1.38140557462),TRINITY_DN3634_c5_g2(-1.43389994753)
GO:0071248	cellular response to metal ion	biological process	2/234	3/681	0.27276	1	TRINITY_DN3455_c5_g4(-1.38140557462),TRINITY_DN3634_c5_g2(-1.43389994753)	TRINITY_DN3455_c5_g4(-1.38140557462),TRINITY_DN3634_c5_g2(-1.43389994753)
GO:0090287	regulation of cellular response to growth factor stimulus	biological process	2/234	3/681	0.27276	1	TRINITY_DN1896_c0_g1(-1.43122376696),TRINITY_DN2990_c3_g1(4.48637222765)	TRINITY_DN1896_c0_g1(-1.43122376696),TRINITY_DN2990_c3_g1(4.48637222765)
GO:0098732	macromolecule deacylation	biological process	2/234	3/681	0.27276	1	TRINITY_DN1267_c0_g1(-3.74317437745),TRINITY_DN3034_c4_g1(-2.34785465768)	TRINITY_DN1267_c0_g1(-3.74317437745),TRINITY_DN3034_c4_g1(-2.34785465768)
GO:1901800	positive regulation of proteasomal protein catabolic process	biological process	2/234	3/681	0.27276	1	TRINITY_DN2830_c1_g6(-2.81950059698),TRINITY_DN3688_c1_g7(-2.38640377363)	TRINITY_DN2830_c1_g6(-2.81950059698),TRINITY_DN3688_c1_g7(-2.38640377363)
GO:1901970	positive regulation of mitotic sister chromatid separation	biological process	2/234	3/681	0.27276	1	TRINITY_DN2830_c1_g6(-2.81950059698),TRINITY_DN3688_c1_g7(-2.38640377363)	TRINITY_DN2830_c1_g6(-2.81950059698),TRINITY_DN3688_c1_g7(-2.38640377363)
GO:1901989	positive regulation of cell cycle phase transition	biological process	2/234	3/681	0.27276	1	TRINITY_DN2830_c1_g6(-2.81950059698),TRINITY_DN3688_c1_g7(-2.38640377363)	TRINITY_DN2830_c1_g6(-2.81950059698),TRINITY_DN3688_c1_g7(-2.38640377363)
GO:1901992	positive regulation of mitotic cell cycle phase transition	biological process	2/234	3/681	0.27276	1	TRINITY_DN2830_c1_g6(-2.81950059698),TRINITY_DN3688_c1_g7(-2.38640377363)	TRINITY_DN2830_c1_g6(-2.81950059698),TRINITY_DN3688_c1_g7(-2.38640377363)
GO:1902101	positive regulation of metaphase/anaphase transition of cell cycle	biological process	2/234	3/681	0.27276	1	TRINITY_DN2830_c1_g6(-2.81950059698),TRINITY_DN3688_c1_g7(-2.38640377363)	TRINITY_DN2830_c1_g6(-2.81950059698),TRINITY_DN3688_c1_g7(-2.38640377363)
GO:1902107	positive regulation of leukocyte differentiation	biological process	2/234	3/681	0.27276	1	TRINITY_DN2863_c0_g2(-1.17670982061),TRINITY_DN2990_c3_g1(4.48637222765)	TRINITY_DN2863_c0_g2(-1.17670982061),TRINITY_DN2990_c3_g1(4.48637222765)
GO:1902750	negative regulation of cell cycle G2/M phase transition	biological process	2/234	3/681	0.27276	1	TRINITY_DN1577_c0_g1(-1.27109622825),TRINITY_DN3285_c2_g1(-1.58640393684)	TRINITY_DN1577_c0_g1(-1.27109622825),TRINITY_DN3285_c2_g1(-1.58640393684)
GO:1903052	positive regulation of proteolysis involved in cellular protein catabolic process	biological process	2/234	3/681	0.27276	1	TRINITY_DN2830_c1_g6(-2.81950059698),TRINITY_DN3688_c1_g7(-2.38640377363)	TRINITY_DN2830_c1_g6(-2.81950059698),TRINITY_DN3688_c1_g7(-2.38640377363)
GO:1903317	regulation of protein maturation	biological process	2/234	3/681	0.27276	1	TRINITY_DN1896_c0_g1(-1.43122376696),TRINITY_DN2863_c0_g2(-1.17670982061)	TRINITY_DN1896_c0_g1(-1.43122376696),TRINITY_DN2863_c0_g2(-1.17670982061)
GO:1903318	negative regulation of protein maturation	biological process	2/234	3/681	0.27276	1	TRINITY_DN1896_c0_g1(-1.43122376696),TRINITY_DN2863_c0_g2(-1.17670982061)	TRINITY_DN1896_c0_g1(-1.43122376696),TRINITY_DN2863_c0_g2(-1.17670982061)
GO:1903364	positive regulation of cellular protein catabolic process	biological process	2/234	3/681	0.27276	1	TRINITY_DN2830_c1_g6(-2.81950059698),TRINITY_DN3688_c1_g7(-2.38640377363)	TRINITY_DN2830_c1_g6(-2.81950059698),TRINITY_DN3688_c1_g7(-2.38640377363)
GO:1903708	positive regulation of hemopoiesis	biological process	2/234	3/681	0.27276	1	TRINITY_DN2863_c0_g2(-1.17670982061),TRINITY_DN2990_c3_g1(4.48637222765)	TRINITY_DN2863_c0_g2(-1.17670982061),TRINITY_DN2990_c3_g1(4.48637222765)
GO:1904356	regulation of telomere maintenance via telomere lengthening	biological process	2/234	3/681	0.27276	1	TRINITY_DN1268_c0_g1(-2.06811775799),TRINITY_DN3593_c3_g1(-1.127844984)	TRINITY_DN1268_c0_g1(-2.06811775799),TRINITY_DN3593_c3_g1(-1.127844984)
GO:1905820	positive regulation of chromosome separation	biological process	2/234	3/681	0.27276	1	TRINITY_DN2830_c1_g6(-2.81950059698),TRINITY_DN3688_c1_g7(-2.38640377363)	TRINITY_DN2830_c1_g6(-2.81950059698),TRINITY_DN3688_c1_g7(-2.38640377363)
GO:2000060	positive regulation of ubiquitin-dependent protein catabolic process	biological process	2/234	3/681	0.27276	1	TRINITY_DN2830_c1_g6(-2.81950059698),TRINITY_DN3688_c1_g7(-2.38640377363)	TRINITY_DN2830_c1_g6(-2.81950059698),TRINITY_DN3688_c1_g7(-2.38640377363)
GO:2000104	negative regulation of DNA-dependent DNA replication	biological process	2/234	3/681	0.27276	1	TRINITY_DN1577_c0_g1(-1.27109622825),TRINITY_DN2834_c2_g1(-1.88177373969)	TRINITY_DN1577_c0_g1(-1.27109622825),TRINITY_DN2834_c2_g1(-1.88177373969)
GO:2000278	regulation of DNA biosynthetic process	biological process	2/234	3/681	0.27276	1	TRINITY_DN1268_c0_g1(-2.06811775799),TRINITY_DN3593_c3_g1(-1.127844984)	TRINITY_DN1268_c0_g1(-2.06811775799),TRINITY_DN3593_c3_g1(-1.127844984)
GO:0000272	polysaccharide catabolic process	biological process	4/234	8/681	0.27909	1	TRINITY_DN2955_c0_g3(1.04682740551),TRINITY_DN3158_c1_g1(-2.93602217915),TRINITY_DN3409_c1_g1(-1.36361747936),TRINITY_DN3409_c1_g2(-2.12264257282)	TRINITY_DN2955_c0_g3(1.04682740551),TRINITY_DN3158_c1_g1(-2.93602217915),TRINITY_DN3409_c1_g1(-1.36361747936),TRINITY_DN3409_c1_g2(-2.12264257282)
GO:0003341	cilium movement	biological process	4/234	8/681	0.27909	1	TRINITY_DN1245_c0_g2(-3.43593361414),TRINITY_DN2656_c0_g2(-4.58846026162),TRINITY_DN3526_c2_g3(-3.28668474605),TRINITY_DN99_c0_g1(-1.6657118923)	TRINITY_DN1245_c0_g2(-3.43593361414),TRINITY_DN2656_c0_g2(-4.58846026162),TRINITY_DN3526_c2_g3(-3.28668474605),TRINITY_DN99_c0_g1(-1.6657118923)
GO:0006278	RNA-dependent DNA biosynthetic process	biological process	4/234	8/681	0.27909	1	TRINITY_DN1268_c0_g1(-2.06811775799),TRINITY_DN3160_c3_g6(1.13017127252),TRINITY_DN3569_c7_g1(-1.71456957864),TRINITY_DN3593_c3_g1(-1.127844984)	TRINITY_DN1268_c0_g1(-2.06811775799),TRINITY_DN3160_c3_g6(1.13017127252),TRINITY_DN3569_c7_g1(-1.71456957864),TRINITY_DN3593_c3_g1(-1.127844984)
GO:0006302	double-strand break repair	biological process	4/234	8/681	0.27909	1	TRINITY_DN1914_c0_g1(-1.41718553061),TRINITY_DN2576_c0_g2(-1.04508082347),TRINITY_DN2894_c1_g4(-1.13651404581),TRINITY_DN3311_c1_g2(-1.13281740221)	TRINITY_DN1914_c0_g1(-1.41718553061),TRINITY_DN2576_c0_g2(-1.04508082347),TRINITY_DN2894_c1_g4(-1.13651404581),TRINITY_DN3311_c1_g2(-1.13281740221)
GO:0007004	telomere maintenance via telomerase	biological process	4/234	8/681	0.27909	1	TRINITY_DN1268_c0_g1(-2.06811775799),TRINITY_DN3160_c3_g6(1.13017127252),TRINITY_DN3569_c7_g1(-1.71456957864),TRINITY_DN3593_c3_g1(-1.127844984)	TRINITY_DN1268_c0_g1(-2.06811775799),TRINITY_DN3160_c3_g6(1.13017127252),TRINITY_DN3569_c7_g1(-1.71456957864),TRINITY_DN3593_c3_g1(-1.127844984)
GO:0009723	response to ethylene	biological process	4/234	8/681	0.27909	1	TRINITY_DN2727_c2_g2(2.80700894859),TRINITY_DN3455_c5_g4(-1.38140557462),TRINITY_DN3600_c1_g3(3.14748655044),TRINITY_DN3634_c5_g2(-1.43389994753)	TRINITY_DN2727_c2_g2(2.80700894859),TRINITY_DN3455_c5_g4(-1.38140557462),TRINITY_DN3600_c1_g3(3.14748655044),TRINITY_DN3634_c5_g2(-1.43389994753)
GO:0010212	response to ionizing radiation	biological process	4/234	8/681	0.27909	1	TRINITY_DN3135_c2_g3(1.84163748525),TRINITY_DN3238_c1_g1(4.68706194956),TRINITY_DN3311_c1_g2(-1.13281740221),TRINITY_DN3355_c2_g2(-1.83919966724)	TRINITY_DN3135_c2_g3(1.84163748525),TRINITY_DN3238_c1_g1(4.68706194956),TRINITY_DN3311_c1_g2(-1.13281740221),TRINITY_DN3355_c2_g2(-1.83919966724)
GO:0010833	telomere maintenance via telomere lengthening	biological process	4/234	8/681	0.27909	1	TRINITY_DN1268_c0_g1(-2.06811775799),TRINITY_DN3160_c3_g6(1.13017127252),TRINITY_DN3569_c7_g1(-1.71456957864),TRINITY_DN3593_c3_g1(-1.127844984)	TRINITY_DN1268_c0_g1(-2.06811775799),TRINITY_DN3160_c3_g6(1.13017127252),TRINITY_DN3569_c7_g1(-1.71456957864),TRINITY_DN3593_c3_g1(-1.127844984)
GO:0045787	positive regulation of cell cycle	biological process	4/234	8/681	0.27909	1	TRINITY_DN1551_c0_g1(-2.62773240149),TRINITY_DN2830_c1_g6(-2.81950059698),TRINITY_DN3034_c3_g2(-2.78869539746),TRINITY_DN3688_c1_g7(-2.38640377363)	TRINITY_DN1551_c0_g1(-2.62773240149),TRINITY_DN2830_c1_g6(-2.81950059698),TRINITY_DN3034_c3_g2(-2.78869539746),TRINITY_DN3688_c1_g7(-2.38640377363)
GO:0070286	axonemal dynein complex assembly	biological process	4/234	8/681	0.27909	1	TRINITY_DN1245_c0_g2(-3.43593361414),TRINITY_DN311_c0_g1(-3.06936398231),TRINITY_DN3526_c2_g3(-3.28668474605),TRINITY_DN99_c0_g1(-1.6657118923)	TRINITY_DN1245_c0_g2(-3.43593361414),TRINITY_DN311_c0_g1(-3.06936398231),TRINITY_DN3526_c2_g3(-3.28668474605),TRINITY_DN99_c0_g1(-1.6657118923)
GO:0071900	regulation of protein serine/threonine kinase activity	biological process	4/234	8/681	0.27909	1	TRINITY_DN1551_c0_g1(-2.62773240149),TRINITY_DN3135_c2_g3(1.84163748525),TRINITY_DN3238_c1_g1(4.68706194956),TRINITY_DN3355_c2_g2(-1.83919966724)	TRINITY_DN1551_c0_g1(-2.62773240149),TRINITY_DN3135_c2_g3(1.84163748525),TRINITY_DN3238_c1_g1(4.68706194956),TRINITY_DN3355_c2_g2(-1.83919966724)
GO:0140013	meiotic nuclear division	biological process	4/234	8/681	0.27909	1	TRINITY_DN2576_c0_g2(-1.04508082347),TRINITY_DN2674_c3_g1(-1.20247600187),TRINITY_DN2880_c5_g2(-1.41891648753),TRINITY_DN2986_c3_g1(-1.95868262638)	TRINITY_DN2576_c0_g2(-1.04508082347),TRINITY_DN2674_c3_g1(-1.20247600187),TRINITY_DN2880_c5_g2(-1.41891648753),TRINITY_DN2986_c3_g1(-1.95868262638)
GO:0048584	positive regulation of response to stimulus	biological process	13/234	32/681	0.27929	1	TRINITY_DN2244_c0_g1(-2.14833104305),TRINITY_DN2618_c2_g3(1.16746035949),TRINITY_DN2670_c0_g1(-1.16807489944),TRINITY_DN2863_c0_g2(-1.17670982061),TRINITY_DN2990_c3_g1(4.48637222765),TRINITY_DN3032_c1_g3(-1.81290474391),TRINITY_DN3135_c2_g3(1.84163748525),TRINITY_DN3238_c1_g1(4.68706194956),TRINITY_DN3324_c1_g1(-1.19910771168),TRINITY_DN3355_c2_g2(-1.83919966724),TRINITY_DN3512_c0_g2(-1.879014742…	TRINITY_DN2244_c0_g1(-2.14833104305),TRINITY_DN2618_c2_g3(1.16746035949),TRINITY_DN2670_c0_g1(-1.16807489944),TRINITY_DN2863_c0_g2(-1.17670982061),TRINITY_DN2990_c3_g1(4.48637222765),TRINITY_DN3032_c1_g3(-1.81290474391),TRINITY_DN3135_c2_g3(1.84163748525),TRINITY_DN3238_c1_g1(4.68706194956),TRINITY_DN3324_c1_g1(-1.19910771168),TRINITY_DN3355_c2_g2(-1.83919966724),TRINITY_DN3512_c0_g2(-1.879014742…
GO:0009653	anatomical structure morphogenesis	biological process	22/234	57/681	0.2857	1	TRINITY_DN1551_c0_g1(-2.62773240149),TRINITY_DN1577_c0_g1(-1.27109622825),TRINITY_DN1896_c0_g1(-1.43122376696),TRINITY_DN2244_c0_g1(-2.14833104305),TRINITY_DN2334_c0_g1(1.51252610966),TRINITY_DN2618_c2_g3(1.16746035949),TRINITY_DN2670_c0_g1(-1.16807489944),TRINITY_DN2767_c3_g3(-1.67248354228),TRINITY_DN2948_c3_g2(-1.25152991183),TRINITY_DN2990_c3_g1(4.48637222765),TRINITY_DN3032_c1_g3(-1.81290474…	TRINITY_DN1551_c0_g1(-2.62773240149),TRINITY_DN1577_c0_g1(-1.27109622825),TRINITY_DN1896_c0_g1(-1.43122376696),TRINITY_DN2244_c0_g1(-2.14833104305),TRINITY_DN2334_c0_g1(1.51252610966),TRINITY_DN2618_c2_g3(1.16746035949),TRINITY_DN2670_c0_g1(-1.16807489944),TRINITY_DN2767_c3_g3(-1.67248354228),TRINITY_DN2948_c3_g2(-1.25152991183),TRINITY_DN2990_c3_g1(4.48637222765),TRINITY_DN3032_c1_g3(-1.81290474…
GO:0043207	response to external biotic stimulus	biological process	18/234	46/681	0.2897	1	TRINITY_DN1383_c0_g2(-5.09453204951),TRINITY_DN1453_c0_g1(-2.82693098456),TRINITY_DN2506_c1_g2(2.69390264406),TRINITY_DN2522_c0_g1(1.71353669634),TRINITY_DN2638_c4_g1(-1.94308971346),TRINITY_DN2638_c4_g3(-1.69613457802),TRINITY_DN2670_c2_g4(-1.43011048969),TRINITY_DN2670_c2_g6(-1.02619526061),TRINITY_DN2727_c2_g2(2.80700894859),TRINITY_DN2782_c0_g6(1.65399754879),TRINITY_DN3243_c2_g4(1.8219994837…	TRINITY_DN1383_c0_g2(-5.09453204951),TRINITY_DN1453_c0_g1(-2.82693098456),TRINITY_DN2506_c1_g2(2.69390264406),TRINITY_DN2522_c0_g1(1.71353669634),TRINITY_DN2638_c4_g1(-1.94308971346),TRINITY_DN2638_c4_g3(-1.69613457802),TRINITY_DN2670_c2_g4(-1.43011048969),TRINITY_DN2670_c2_g6(-1.02619526061),TRINITY_DN2727_c2_g2(2.80700894859),TRINITY_DN2782_c0_g6(1.65399754879),TRINITY_DN3243_c2_g4(1.8219994837…
GO:0051707	response to other organism	biological process	18/234	46/681	0.2897	1	TRINITY_DN1383_c0_g2(-5.09453204951),TRINITY_DN1453_c0_g1(-2.82693098456),TRINITY_DN2506_c1_g2(2.69390264406),TRINITY_DN2522_c0_g1(1.71353669634),TRINITY_DN2638_c4_g1(-1.94308971346),TRINITY_DN2638_c4_g3(-1.69613457802),TRINITY_DN2670_c2_g4(-1.43011048969),TRINITY_DN2670_c2_g6(-1.02619526061),TRINITY_DN2727_c2_g2(2.80700894859),TRINITY_DN2782_c0_g6(1.65399754879),TRINITY_DN3243_c2_g4(1.8219994837…	TRINITY_DN1383_c0_g2(-5.09453204951),TRINITY_DN1453_c0_g1(-2.82693098456),TRINITY_DN2506_c1_g2(2.69390264406),TRINITY_DN2522_c0_g1(1.71353669634),TRINITY_DN2638_c4_g1(-1.94308971346),TRINITY_DN2638_c4_g3(-1.69613457802),TRINITY_DN2670_c2_g4(-1.43011048969),TRINITY_DN2670_c2_g6(-1.02619526061),TRINITY_DN2727_c2_g2(2.80700894859),TRINITY_DN2782_c0_g6(1.65399754879),TRINITY_DN3243_c2_g4(1.8219994837…
GO:1901605	alpha-amino acid metabolic process	biological process	7/234	16/681	0.29071	1	TRINITY_DN2481_c5_g1(-1.72793019786),TRINITY_DN2698_c1_g2(-3.10626025919),TRINITY_DN2698_c1_g3(-1.59157343931),TRINITY_DN2989_c0_g3(-1.94950554293),TRINITY_DN3023_c1_g1(1.29467178693),TRINITY_DN3345_c3_g2(-1.99589681954),TRINITY_DN3463_c3_g2(1.40977209201)	TRINITY_DN2481_c5_g1(-1.72793019786),TRINITY_DN2698_c1_g2(-3.10626025919),TRINITY_DN2698_c1_g3(-1.59157343931),TRINITY_DN2989_c0_g3(-1.94950554293),TRINITY_DN3023_c1_g1(1.29467178693),TRINITY_DN3345_c3_g2(-1.99589681954),TRINITY_DN3463_c3_g2(1.40977209201)
GO:1901699	cellular response to nitrogen compound	biological process	7/234	16/681	0.29071	1	TRINITY_DN1357_c0_g1(-2.55339730538),TRINITY_DN2677_c1_g2(1.75084897723),TRINITY_DN2991_c1_g2(-1.38723740444),TRINITY_DN3130_c0_g1(-1.11371794823),TRINITY_DN3455_c5_g4(-1.38140557462),TRINITY_DN3634_c5_g2(-1.43389994753),TRINITY_DN3757_c3_g4(2.45866702157)	TRINITY_DN1357_c0_g1(-2.55339730538),TRINITY_DN2677_c1_g2(1.75084897723),TRINITY_DN2991_c1_g2(-1.38723740444),TRINITY_DN3130_c0_g1(-1.11371794823),TRINITY_DN3455_c5_g4(-1.38140557462),TRINITY_DN3634_c5_g2(-1.43389994753),TRINITY_DN3757_c3_g4(2.45866702157)
GO:0010646	regulation of cell communication	biological process	24/234	63/681	0.30008	1	TRINITY_DN1357_c0_g1(-2.55339730538),TRINITY_DN1896_c0_g1(-1.43122376696),TRINITY_DN2244_c0_g1(-2.14833104305),TRINITY_DN2512_c2_g5(-3.78741905927),TRINITY_DN2559_c3_g1(-1.41187808043),TRINITY_DN2618_c2_g3(1.16746035949),TRINITY_DN2670_c0_g1(-1.16807489944),TRINITY_DN2677_c1_g2(1.75084897723),TRINITY_DN2863_c0_g2(-1.17670982061),TRINITY_DN2948_c3_g2(-1.25152991183),TRINITY_DN2990_c3_g1(4.48637222…	TRINITY_DN1357_c0_g1(-2.55339730538),TRINITY_DN1896_c0_g1(-1.43122376696),TRINITY_DN2244_c0_g1(-2.14833104305),TRINITY_DN2512_c2_g5(-3.78741905927),TRINITY_DN2559_c3_g1(-1.41187808043),TRINITY_DN2618_c2_g3(1.16746035949),TRINITY_DN2670_c0_g1(-1.16807489944),TRINITY_DN2677_c1_g2(1.75084897723),TRINITY_DN2863_c0_g2(-1.17670982061),TRINITY_DN2948_c3_g2(-1.25152991183),TRINITY_DN2990_c3_g1(4.48637222…
GO:0023051	regulation of signaling	biological process	24/234	63/681	0.30008	1	TRINITY_DN1357_c0_g1(-2.55339730538),TRINITY_DN1896_c0_g1(-1.43122376696),TRINITY_DN2244_c0_g1(-2.14833104305),TRINITY_DN2512_c2_g5(-3.78741905927),TRINITY_DN2559_c3_g1(-1.41187808043),TRINITY_DN2618_c2_g3(1.16746035949),TRINITY_DN2670_c0_g1(-1.16807489944),TRINITY_DN2677_c1_g2(1.75084897723),TRINITY_DN2863_c0_g2(-1.17670982061),TRINITY_DN2948_c3_g2(-1.25152991183),TRINITY_DN2990_c3_g1(4.48637222…	TRINITY_DN1357_c0_g1(-2.55339730538),TRINITY_DN1896_c0_g1(-1.43122376696),TRINITY_DN2244_c0_g1(-2.14833104305),TRINITY_DN2512_c2_g5(-3.78741905927),TRINITY_DN2559_c3_g1(-1.41187808043),TRINITY_DN2618_c2_g3(1.16746035949),TRINITY_DN2670_c0_g1(-1.16807489944),TRINITY_DN2677_c1_g2(1.75084897723),TRINITY_DN2863_c0_g2(-1.17670982061),TRINITY_DN2948_c3_g2(-1.25152991183),TRINITY_DN2990_c3_g1(4.48637222…
GO:0051049	regulation of transport	biological process	15/234	38/681	0.30201	1	TRINITY_DN1357_c0_g1(-2.55339730538),TRINITY_DN1453_c0_g1(-2.82693098456),TRINITY_DN2559_c3_g1(-1.41187808043),TRINITY_DN2618_c2_g3(1.16746035949),TRINITY_DN2642_c2_g4(2.69107002639),TRINITY_DN2677_c1_g2(1.75084897723),TRINITY_DN2991_c1_g2(-1.38723740444),TRINITY_DN3032_c1_g3(-1.81290474391),TRINITY_DN3118_c6_g1(-2.15189148233),TRINITY_DN3130_c0_g1(-1.11371794823),TRINITY_DN3324_c1_g1(-1.19910771…	TRINITY_DN1357_c0_g1(-2.55339730538),TRINITY_DN1453_c0_g1(-2.82693098456),TRINITY_DN2559_c3_g1(-1.41187808043),TRINITY_DN2618_c2_g3(1.16746035949),TRINITY_DN2642_c2_g4(2.69107002639),TRINITY_DN2677_c1_g2(1.75084897723),TRINITY_DN2991_c1_g2(-1.38723740444),TRINITY_DN3032_c1_g3(-1.81290474391),TRINITY_DN3118_c6_g1(-2.15189148233),TRINITY_DN3130_c0_g1(-1.11371794823),TRINITY_DN3324_c1_g1(-1.19910771…
GO:0042325	regulation of phosphorylation	biological process	8/234	19/681	0.31087	1	TRINITY_DN1551_c0_g1(-2.62773240149),TRINITY_DN2618_c2_g3(1.16746035949),TRINITY_DN3135_c2_g3(1.84163748525),TRINITY_DN3238_c1_g1(4.68706194956),TRINITY_DN3355_c2_g2(-1.83919966724),TRINITY_DN3512_c0_g2(-1.87901474245),TRINITY_DN3656_c1_g1(-2.08721167236),TRINITY_DN3656_c1_g5(-3.02684114829)	TRINITY_DN1551_c0_g1(-2.62773240149),TRINITY_DN2618_c2_g3(1.16746035949),TRINITY_DN3135_c2_g3(1.84163748525),TRINITY_DN3238_c1_g1(4.68706194956),TRINITY_DN3355_c2_g2(-1.83919966724),TRINITY_DN3512_c0_g2(-1.87901474245),TRINITY_DN3656_c1_g1(-2.08721167236),TRINITY_DN3656_c1_g5(-3.02684114829)
GO:0006928	movement of cell or subcellular component	biological process	16/234	41/681	0.31194	1	TRINITY_DN109_c0_g1(-2.43108989434),TRINITY_DN1245_c0_g2(-3.43593361414),TRINITY_DN1483_c0_g1(-2.10294444973),TRINITY_DN1896_c0_g1(-1.43122376696),TRINITY_DN2594_c2_g3(-1.36851091336),TRINITY_DN2639_c3_g4(-1.71335820389),TRINITY_DN2656_c0_g2(-4.58846026162),TRINITY_DN2948_c3_g2(-1.25152991183),TRINITY_DN2990_c3_g1(4.48637222765),TRINITY_DN311_c0_g1(-3.06936398231),TRINITY_DN3282_c0_g4(1.205938036…	TRINITY_DN109_c0_g1(-2.43108989434),TRINITY_DN1245_c0_g2(-3.43593361414),TRINITY_DN1483_c0_g1(-2.10294444973),TRINITY_DN1896_c0_g1(-1.43122376696),TRINITY_DN2594_c2_g3(-1.36851091336),TRINITY_DN2639_c3_g4(-1.71335820389),TRINITY_DN2656_c0_g2(-4.58846026162),TRINITY_DN2948_c3_g2(-1.25152991183),TRINITY_DN2990_c3_g1(4.48637222765),TRINITY_DN311_c0_g1(-3.06936398231),TRINITY_DN3282_c0_g4(1.205938036…
GO:0001539	cilium or flagellum-dependent cell motility	biological process	5/234	11/681	0.31403	1	TRINITY_DN109_c0_g1(-2.43108989434),TRINITY_DN1245_c0_g2(-3.43593361414),TRINITY_DN311_c0_g1(-3.06936398231),TRINITY_DN3526_c2_g3(-3.28668474605),TRINITY_DN99_c0_g1(-1.6657118923)	TRINITY_DN109_c0_g1(-2.43108989434),TRINITY_DN1245_c0_g2(-3.43593361414),TRINITY_DN311_c0_g1(-3.06936398231),TRINITY_DN3526_c2_g3(-3.28668474605),TRINITY_DN99_c0_g1(-1.6657118923)
GO:0009451	RNA modification	biological process	5/234	11/681	0.31403	1	TRINITY_DN2944_c0_g2(-1.28683924043),TRINITY_DN3002_c7_g7(1.15397086811),TRINITY_DN3160_c3_g6(1.13017127252),TRINITY_DN3466_c5_g2(-1.56168631845),TRINITY_DN3522_c0_g2(-1.86254793253)	TRINITY_DN2944_c0_g2(-1.28683924043),TRINITY_DN3002_c7_g7(1.15397086811),TRINITY_DN3160_c3_g6(1.13017127252),TRINITY_DN3466_c5_g2(-1.56168631845),TRINITY_DN3522_c0_g2(-1.86254793253)
GO:0009657	plastid organization	biological process	5/234	11/681	0.31403	1	TRINITY_DN1349_c0_g1(1.13858735078),TRINITY_DN1762_c0_g1(1.27810707468),TRINITY_DN2604_c2_g2(-1.40351045286),TRINITY_DN3081_c0_g1(1.24454299096),TRINITY_DN3463_c3_g2(1.40977209201)	TRINITY_DN1349_c0_g1(1.13858735078),TRINITY_DN1762_c0_g1(1.27810707468),TRINITY_DN2604_c2_g2(-1.40351045286),TRINITY_DN3081_c0_g1(1.24454299096),TRINITY_DN3463_c3_g2(1.40977209201)
GO:0009792	embryo development ending in birth or egg hatching	biological process	5/234	11/681	0.31403	1	TRINITY_DN1551_c0_g1(-2.62773240149),TRINITY_DN2244_c0_g1(-2.14833104305),TRINITY_DN2670_c0_g1(-1.16807489944),TRINITY_DN2990_c3_g1(4.48637222765),TRINITY_DN3602_c4_g2(-2.95532582631)	TRINITY_DN1551_c0_g1(-2.62773240149),TRINITY_DN2244_c0_g1(-2.14833104305),TRINITY_DN2670_c0_g1(-1.16807489944),TRINITY_DN2990_c3_g1(4.48637222765),TRINITY_DN3602_c4_g2(-2.95532582631)
GO:0016049	cell growth	biological process	5/234	11/681	0.31403	1	TRINITY_DN2512_c2_g5(-3.78741905927),TRINITY_DN2767_c3_g3(-1.67248354228),TRINITY_DN3034_c3_g2(-2.78869539746),TRINITY_DN3324_c1_g1(-1.19910771168),TRINITY_DN3496_c4_g3(-1.18941672544)	TRINITY_DN2512_c2_g5(-3.78741905927),TRINITY_DN2767_c3_g3(-1.67248354228),TRINITY_DN3034_c3_g2(-2.78869539746),TRINITY_DN3324_c1_g1(-1.19910771168),TRINITY_DN3496_c4_g3(-1.18941672544)
GO:0030162	regulation of proteolysis	biological process	5/234	11/681	0.31403	1	TRINITY_DN1896_c0_g1(-1.43122376696),TRINITY_DN2830_c1_g6(-2.81950059698),TRINITY_DN2863_c0_g2(-1.17670982061),TRINITY_DN2990_c3_g1(4.48637222765),TRINITY_DN3688_c1_g7(-2.38640377363)	TRINITY_DN1896_c0_g1(-1.43122376696),TRINITY_DN2830_c1_g6(-2.81950059698),TRINITY_DN2863_c0_g2(-1.17670982061),TRINITY_DN2990_c3_g1(4.48637222765),TRINITY_DN3688_c1_g7(-2.38640377363)
GO:0030435	sporulation resulting in formation of a cellular spore	biological process	5/234	11/681	0.31403	1	TRINITY_DN2618_c2_g3(1.16746035949),TRINITY_DN3032_c1_g3(-1.81290474391),TRINITY_DN3512_c0_g2(-1.87901474245),TRINITY_DN3656_c1_g1(-2.08721167236),TRINITY_DN3656_c1_g5(-3.02684114829)	TRINITY_DN2618_c2_g3(1.16746035949),TRINITY_DN3032_c1_g3(-1.81290474391),TRINITY_DN3512_c0_g2(-1.87901474245),TRINITY_DN3656_c1_g1(-2.08721167236),TRINITY_DN3656_c1_g5(-3.02684114829)
GO:0034504	protein localization to nucleus	biological process	5/234	11/681	0.31403	1	TRINITY_DN2618_c2_g3(1.16746035949),TRINITY_DN3311_c1_g2(-1.13281740221),TRINITY_DN3512_c0_g2(-1.87901474245),TRINITY_DN3656_c1_g1(-2.08721167236),TRINITY_DN3656_c1_g5(-3.02684114829)	TRINITY_DN2618_c2_g3(1.16746035949),TRINITY_DN3311_c1_g2(-1.13281740221),TRINITY_DN3512_c0_g2(-1.87901474245),TRINITY_DN3656_c1_g1(-2.08721167236),TRINITY_DN3656_c1_g5(-3.02684114829)
GO:0043934	sporulation	biological process	5/234	11/681	0.31403	1	TRINITY_DN2618_c2_g3(1.16746035949),TRINITY_DN3032_c1_g3(-1.81290474391),TRINITY_DN3512_c0_g2(-1.87901474245),TRINITY_DN3656_c1_g1(-2.08721167236),TRINITY_DN3656_c1_g5(-3.02684114829)	TRINITY_DN2618_c2_g3(1.16746035949),TRINITY_DN3032_c1_g3(-1.81290474391),TRINITY_DN3512_c0_g2(-1.87901474245),TRINITY_DN3656_c1_g1(-2.08721167236),TRINITY_DN3656_c1_g5(-3.02684114829)
GO:0048477	oogenesis	biological process	5/234	11/681	0.31403	1	TRINITY_DN1577_c0_g1(-1.27109622825),TRINITY_DN2948_c3_g2(-1.25152991183),TRINITY_DN2990_c3_g1(4.48637222765),TRINITY_DN3344_c2_g2(-1.07984282302),TRINITY_DN3416_c0_g3(-1.06697066005)	TRINITY_DN1577_c0_g1(-1.27109622825),TRINITY_DN2948_c3_g2(-1.25152991183),TRINITY_DN2990_c3_g1(4.48637222765),TRINITY_DN3344_c2_g2(-1.07984282302),TRINITY_DN3416_c0_g3(-1.06697066005)
GO:0048653	anther development	biological process	5/234	11/681	0.31403	1	TRINITY_DN2799_c7_g1(-1.47543719703),TRINITY_DN2942_c1_g5(-2.01094648508),TRINITY_DN2942_c1_g6(-2.98575187314),TRINITY_DN3328_c3_g3(-3.02560339128),TRINITY_DN3589_c6_g3(-1.72671706636)	TRINITY_DN2799_c7_g1(-1.47543719703),TRINITY_DN2942_c1_g5(-2.01094648508),TRINITY_DN2942_c1_g6(-2.98575187314),TRINITY_DN3328_c3_g3(-3.02560339128),TRINITY_DN3589_c6_g3(-1.72671706636)
GO:0060285	cilium-dependent cell motility	biological process	5/234	11/681	0.31403	1	TRINITY_DN109_c0_g1(-2.43108989434),TRINITY_DN1245_c0_g2(-3.43593361414),TRINITY_DN311_c0_g1(-3.06936398231),TRINITY_DN3526_c2_g3(-3.28668474605),TRINITY_DN99_c0_g1(-1.6657118923)	TRINITY_DN109_c0_g1(-2.43108989434),TRINITY_DN1245_c0_g2(-3.43593361414),TRINITY_DN311_c0_g1(-3.06936398231),TRINITY_DN3526_c2_g3(-3.28668474605),TRINITY_DN99_c0_g1(-1.6657118923)
GO:0048609	multicellular organismal reproductive process	biological process	12/234	30/681	0.31477	1	TRINITY_DN1577_c0_g1(-1.27109622825),TRINITY_DN2576_c0_g2(-1.04508082347),TRINITY_DN2948_c3_g2(-1.25152991183),TRINITY_DN2986_c3_g1(-1.95868262638),TRINITY_DN2990_c3_g1(4.48637222765),TRINITY_DN3160_c3_g6(1.13017127252),TRINITY_DN3282_c0_g4(1.20593803666),TRINITY_DN3344_c2_g2(-1.07984282302),TRINITY_DN3416_c0_g3(-1.06697066005),TRINITY_DN3466_c5_g2(-1.56168631845),TRINITY_DN3602_c4_g2(-2.95532582…	TRINITY_DN1577_c0_g1(-1.27109622825),TRINITY_DN2576_c0_g2(-1.04508082347),TRINITY_DN2948_c3_g2(-1.25152991183),TRINITY_DN2986_c3_g1(-1.95868262638),TRINITY_DN2990_c3_g1(4.48637222765),TRINITY_DN3160_c3_g6(1.13017127252),TRINITY_DN3282_c0_g4(1.20593803666),TRINITY_DN3344_c2_g2(-1.07984282302),TRINITY_DN3416_c0_g3(-1.06697066005),TRINITY_DN3466_c5_g2(-1.56168631845),TRINITY_DN3602_c4_g2(-2.95532582…
GO:0098656	anion transmembrane transport	biological process	12/234	30/681	0.31477	1	TRINITY_DN2198_c0_g1(1.02592882666),TRINITY_DN2823_c2_g4(-1.13639408501),TRINITY_DN2848_c1_g1(1.48364203419),TRINITY_DN2981_c1_g1(-1.28653934136),TRINITY_DN2991_c6_g5(-1.00335109421),TRINITY_DN3217_c0_g1(-4.26414724998),TRINITY_DN3217_c0_g2(-14.4886184371),TRINITY_DN3324_c1_g1(-1.19910771168),TRINITY_DN3572_c0_g1(2.50846379256),TRINITY_DN3572_c0_g4(-1.01046578553),TRINITY_DN3634_c5_g2(-1.43389994…	TRINITY_DN2198_c0_g1(1.02592882666),TRINITY_DN2823_c2_g4(-1.13639408501),TRINITY_DN2848_c1_g1(1.48364203419),TRINITY_DN2981_c1_g1(-1.28653934136),TRINITY_DN2991_c6_g5(-1.00335109421),TRINITY_DN3217_c0_g1(-4.26414724998),TRINITY_DN3217_c0_g2(-14.4886184371),TRINITY_DN3324_c1_g1(-1.19910771168),TRINITY_DN3572_c0_g1(2.50846379256),TRINITY_DN3572_c0_g4(-1.01046578553),TRINITY_DN3634_c5_g2(-1.43389994…
GO:0009605	response to external stimulus	biological process	32/234	86/681	0.3154	1	TRINITY_DN1267_c0_g1(-3.74317437745),TRINITY_DN1383_c0_g2(-5.09453204951),TRINITY_DN1453_c0_g1(-2.82693098456),TRINITY_DN2506_c1_g2(2.69390264406),TRINITY_DN2522_c0_g1(1.71353669634),TRINITY_DN2618_c2_g3(1.16746035949),TRINITY_DN2638_c4_g1(-1.94308971346),TRINITY_DN2638_c4_g3(-1.69613457802),TRINITY_DN2670_c2_g4(-1.43011048969),TRINITY_DN2670_c2_g6(-1.02619526061),TRINITY_DN2727_c2_g2(2.807008948…	TRINITY_DN1267_c0_g1(-3.74317437745),TRINITY_DN1383_c0_g2(-5.09453204951),TRINITY_DN1453_c0_g1(-2.82693098456),TRINITY_DN2506_c1_g2(2.69390264406),TRINITY_DN2522_c0_g1(1.71353669634),TRINITY_DN2618_c2_g3(1.16746035949),TRINITY_DN2638_c4_g1(-1.94308971346),TRINITY_DN2638_c4_g3(-1.69613457802),TRINITY_DN2670_c2_g4(-1.43011048969),TRINITY_DN2670_c2_g6(-1.02619526061),TRINITY_DN2727_c2_g2(2.807008948…
GO:0016310	phosphorylation	biological process	22/234	58/681	0.3215	1	TRINITY_DN1268_c0_g1(-2.06811775799),TRINITY_DN1551_c0_g1(-2.62773240149),TRINITY_DN2274_c0_g1(2.02583650026),TRINITY_DN2512_c2_g5(-3.78741905927),TRINITY_DN2618_c2_g3(1.16746035949),TRINITY_DN2638_c4_g1(-1.94308971346),TRINITY_DN2638_c4_g3(-1.69613457802),TRINITY_DN3030_c0_g5(-1.81942673788),TRINITY_DN3135_c2_g3(1.84163748525),TRINITY_DN3160_c3_g6(1.13017127252),TRINITY_DN3238_c1_g1(4.6870619495…	TRINITY_DN1268_c0_g1(-2.06811775799),TRINITY_DN1551_c0_g1(-2.62773240149),TRINITY_DN2274_c0_g1(2.02583650026),TRINITY_DN2512_c2_g5(-3.78741905927),TRINITY_DN2618_c2_g3(1.16746035949),TRINITY_DN2638_c4_g1(-1.94308971346),TRINITY_DN2638_c4_g3(-1.69613457802),TRINITY_DN3030_c0_g5(-1.81942673788),TRINITY_DN3135_c2_g3(1.84163748525),TRINITY_DN3160_c3_g6(1.13017127252),TRINITY_DN3238_c1_g1(4.6870619495…
GO:0031669	cellular response to nutrient levels	biological process	9/234	22/681	0.32766	1	TRINITY_DN2618_c2_g3(1.16746035949),TRINITY_DN2948_c3_g2(-1.25152991183),TRINITY_DN3311_c1_g2(-1.13281740221),TRINITY_DN3344_c2_g2(-1.07984282302),TRINITY_DN3416_c0_g3(-1.06697066005),TRINITY_DN3512_c0_g2(-1.87901474245),TRINITY_DN3520_c4_g1(1.22629129786),TRINITY_DN3656_c1_g1(-2.08721167236),TRINITY_DN3656_c1_g5(-3.02684114829)	TRINITY_DN2618_c2_g3(1.16746035949),TRINITY_DN2948_c3_g2(-1.25152991183),TRINITY_DN3311_c1_g2(-1.13281740221),TRINITY_DN3344_c2_g2(-1.07984282302),TRINITY_DN3416_c0_g3(-1.06697066005),TRINITY_DN3512_c0_g2(-1.87901474245),TRINITY_DN3520_c4_g1(1.22629129786),TRINITY_DN3656_c1_g1(-2.08721167236),TRINITY_DN3656_c1_g5(-3.02684114829)
GO:0042594	response to starvation	biological process	9/234	22/681	0.32766	1	TRINITY_DN2618_c2_g3(1.16746035949),TRINITY_DN2948_c3_g2(-1.25152991183),TRINITY_DN3311_c1_g2(-1.13281740221),TRINITY_DN3344_c2_g2(-1.07984282302),TRINITY_DN3416_c0_g3(-1.06697066005),TRINITY_DN3512_c0_g2(-1.87901474245),TRINITY_DN3520_c4_g1(1.22629129786),TRINITY_DN3656_c1_g1(-2.08721167236),TRINITY_DN3656_c1_g5(-3.02684114829)	TRINITY_DN2618_c2_g3(1.16746035949),TRINITY_DN2948_c3_g2(-1.25152991183),TRINITY_DN3311_c1_g2(-1.13281740221),TRINITY_DN3344_c2_g2(-1.07984282302),TRINITY_DN3416_c0_g3(-1.06697066005),TRINITY_DN3512_c0_g2(-1.87901474245),TRINITY_DN3520_c4_g1(1.22629129786),TRINITY_DN3656_c1_g1(-2.08721167236),TRINITY_DN3656_c1_g5(-3.02684114829)
GO:0006810	transport	biological process	63/234	175/681	0.32964	1	TRINITY_DN109_c0_g1(-2.43108989434),TRINITY_DN1269_c0_g1(-2.69702190868),TRINITY_DN1357_c0_g1(-2.55339730538),TRINITY_DN1373_c0_g1(-2.06665804542),TRINITY_DN1453_c0_g1(-2.82693098456),TRINITY_DN1483_c0_g1(-2.10294444973),TRINITY_DN1762_c0_g1(1.27810707468),TRINITY_DN1896_c0_g1(-1.43122376696),TRINITY_DN1903_c0_g1(-1.0299931519),TRINITY_DN1964_c0_g1(-1.68853346027),TRINITY_DN2198_c0_g1(1.025928826…	TRINITY_DN109_c0_g1(-2.43108989434),TRINITY_DN1269_c0_g1(-2.69702190868),TRINITY_DN1357_c0_g1(-2.55339730538),TRINITY_DN1373_c0_g1(-2.06665804542),TRINITY_DN1453_c0_g1(-2.82693098456),TRINITY_DN1483_c0_g1(-2.10294444973),TRINITY_DN1762_c0_g1(1.27810707468),TRINITY_DN1896_c0_g1(-1.43122376696),TRINITY_DN1903_c0_g1(-1.0299931519),TRINITY_DN1964_c0_g1(-1.68853346027),TRINITY_DN2198_c0_g1(1.025928826…
GO:0048869	cellular developmental process	biological process	24/234	64/681	0.33485	1	TRINITY_DN1577_c0_g1(-1.27109622825),TRINITY_DN1896_c0_g1(-1.43122376696),TRINITY_DN2244_c0_g1(-2.14833104305),TRINITY_DN2618_c2_g3(1.16746035949),TRINITY_DN2670_c0_g1(-1.16807489944),TRINITY_DN2767_c3_g3(-1.67248354228),TRINITY_DN2863_c0_g2(-1.17670982061),TRINITY_DN2948_c3_g2(-1.25152991183),TRINITY_DN2990_c3_g1(4.48637222765),TRINITY_DN3032_c1_g3(-1.81290474391),TRINITY_DN3034_c3_g2(-2.7886953…	TRINITY_DN1577_c0_g1(-1.27109622825),TRINITY_DN1896_c0_g1(-1.43122376696),TRINITY_DN2244_c0_g1(-2.14833104305),TRINITY_DN2618_c2_g3(1.16746035949),TRINITY_DN2670_c0_g1(-1.16807489944),TRINITY_DN2767_c3_g3(-1.67248354228),TRINITY_DN2863_c0_g2(-1.17670982061),TRINITY_DN2948_c3_g2(-1.25152991183),TRINITY_DN2990_c3_g1(4.48637222765),TRINITY_DN3032_c1_g3(-1.81290474391),TRINITY_DN3034_c3_g2(-2.7886953…
GO:0044281	small molecule metabolic process	biological process	30/234	81/681	0.33595	1	TRINITY_DN1267_c0_g1(-3.74317437745),TRINITY_DN1268_c0_g1(-2.06811775799),TRINITY_DN1383_c0_g2(-5.09453204951),TRINITY_DN2274_c0_g1(2.02583650026),TRINITY_DN2378_c0_g1(-2.74436306224),TRINITY_DN2481_c5_g1(-1.72793019786),TRINITY_DN2512_c2_g5(-3.78741905927),TRINITY_DN2605_c4_g2(-1.48134265292),TRINITY_DN2638_c4_g1(-1.94308971346),TRINITY_DN2638_c4_g3(-1.69613457802),TRINITY_DN2698_c1_g2(-3.106260…	TRINITY_DN1267_c0_g1(-3.74317437745),TRINITY_DN1268_c0_g1(-2.06811775799),TRINITY_DN1383_c0_g2(-5.09453204951),TRINITY_DN2274_c0_g1(2.02583650026),TRINITY_DN2378_c0_g1(-2.74436306224),TRINITY_DN2481_c5_g1(-1.72793019786),TRINITY_DN2512_c2_g5(-3.78741905927),TRINITY_DN2605_c4_g2(-1.48134265292),TRINITY_DN2638_c4_g1(-1.94308971346),TRINITY_DN2638_c4_g3(-1.69613457802),TRINITY_DN2698_c1_g2(-3.106260…
GO:0006310	DNA recombination	biological process	6/234	14/681	0.33918	1	TRINITY_DN1914_c0_g1(-1.41718553061),TRINITY_DN2576_c0_g2(-1.04508082347),TRINITY_DN2880_c5_g2(-1.41891648753),TRINITY_DN2986_c3_g1(-1.95868262638),TRINITY_DN3311_c1_g2(-1.13281740221),TRINITY_DN3593_c3_g1(-1.127844984)	TRINITY_DN1914_c0_g1(-1.41718553061),TRINITY_DN2576_c0_g2(-1.04508082347),TRINITY_DN2880_c5_g2(-1.41891648753),TRINITY_DN2986_c3_g1(-1.95868262638),TRINITY_DN3311_c1_g2(-1.13281740221),TRINITY_DN3593_c3_g1(-1.127844984)
GO:0051321	meiotic cell cycle	biological process	6/234	14/681	0.33918	1	TRINITY_DN2576_c0_g2(-1.04508082347),TRINITY_DN2674_c3_g1(-1.20247600187),TRINITY_DN2834_c2_g1(-1.88177373969),TRINITY_DN2880_c5_g2(-1.41891648753),TRINITY_DN2986_c3_g1(-1.95868262638),TRINITY_DN3595_c1_g1(-3.30684267146)	TRINITY_DN2576_c0_g2(-1.04508082347),TRINITY_DN2674_c3_g1(-1.20247600187),TRINITY_DN2834_c2_g1(-1.88177373969),TRINITY_DN2880_c5_g2(-1.41891648753),TRINITY_DN2986_c3_g1(-1.95868262638),TRINITY_DN3595_c1_g1(-3.30684267146)
GO:0000187	activation of MAPK activity	biological process	3/234	6/681	0.33965	1	TRINITY_DN3135_c2_g3(1.84163748525),TRINITY_DN3238_c1_g1(4.68706194956),TRINITY_DN3355_c2_g2(-1.83919966724)	TRINITY_DN3135_c2_g3(1.84163748525),TRINITY_DN3238_c1_g1(4.68706194956),TRINITY_DN3355_c2_g2(-1.83919966724)
GO:0000724	double-strand break repair via homologous recombination	biological process	3/234	6/681	0.33965	1	TRINITY_DN1914_c0_g1(-1.41718553061),TRINITY_DN2576_c0_g2(-1.04508082347),TRINITY_DN3311_c1_g2(-1.13281740221)	TRINITY_DN1914_c0_g1(-1.41718553061),TRINITY_DN2576_c0_g2(-1.04508082347),TRINITY_DN3311_c1_g2(-1.13281740221)
GO:0000725	recombinational repair	biological process	3/234	6/681	0.33965	1	TRINITY_DN1914_c0_g1(-1.41718553061),TRINITY_DN2576_c0_g2(-1.04508082347),TRINITY_DN3311_c1_g2(-1.13281740221)	TRINITY_DN1914_c0_g1(-1.41718553061),TRINITY_DN2576_c0_g2(-1.04508082347),TRINITY_DN3311_c1_g2(-1.13281740221)
GO:0007127	meiosis I	biological process	3/234	6/681	0.33965	1	TRINITY_DN2674_c3_g1(-1.20247600187),TRINITY_DN2880_c5_g2(-1.41891648753),TRINITY_DN2986_c3_g1(-1.95868262638)	TRINITY_DN2674_c3_g1(-1.20247600187),TRINITY_DN2880_c5_g2(-1.41891648753),TRINITY_DN2986_c3_g1(-1.95868262638)
GO:0007186	G-protein coupled receptor signaling pathway	biological process	3/234	6/681	0.33965	1	TRINITY_DN2948_c3_g2(-1.25152991183),TRINITY_DN3344_c2_g2(-1.07984282302),TRINITY_DN3416_c0_g3(-1.06697066005)	TRINITY_DN2948_c3_g2(-1.25152991183),TRINITY_DN3344_c2_g2(-1.07984282302),TRINITY_DN3416_c0_g3(-1.06697066005)
GO:0007219	Notch signaling pathway	biological process	3/234	6/681	0.33965	1	TRINITY_DN2244_c0_g1(-2.14833104305),TRINITY_DN2670_c0_g1(-1.16807489944),TRINITY_DN2863_c0_g2(-1.17670982061)	TRINITY_DN2244_c0_g1(-2.14833104305),TRINITY_DN2670_c0_g1(-1.16807489944),TRINITY_DN2863_c0_g2(-1.17670982061)
GO:0016042	lipid catabolic process	biological process	3/234	6/681	0.33965	1	TRINITY_DN1086_c0_g1(2.04510527931),TRINITY_DN2670_c2_g6(-1.02619526061),TRINITY_DN2917_c3_g1(-1.13937325966)	TRINITY_DN1086_c0_g1(2.04510527931),TRINITY_DN2670_c2_g6(-1.02619526061),TRINITY_DN2917_c3_g1(-1.13937325966)
GO:0019098	reproductive behavior	biological process	3/234	6/681	0.33965	1	TRINITY_DN2948_c3_g2(-1.25152991183),TRINITY_DN3344_c2_g2(-1.07984282302),TRINITY_DN3416_c0_g3(-1.06697066005)	TRINITY_DN2948_c3_g2(-1.25152991183),TRINITY_DN3344_c2_g2(-1.07984282302),TRINITY_DN3416_c0_g3(-1.06697066005)
GO:0042180	cellular ketone metabolic process	biological process	3/234	6/681	0.33965	1	TRINITY_DN1267_c0_g1(-3.74317437745),TRINITY_DN767_c0_g1(-1.4406680883),TRINITY_DN877_c0_g2(-2.38734682685)	TRINITY_DN1267_c0_g1(-3.74317437745),TRINITY_DN767_c0_g1(-1.4406680883),TRINITY_DN877_c0_g2(-2.38734682685)
GO:0043406	positive regulation of MAP kinase activity	biological process	3/234	6/681	0.33965	1	TRINITY_DN3135_c2_g3(1.84163748525),TRINITY_DN3238_c1_g1(4.68706194956),TRINITY_DN3355_c2_g2(-1.83919966724)	TRINITY_DN3135_c2_g3(1.84163748525),TRINITY_DN3238_c1_g1(4.68706194956),TRINITY_DN3355_c2_g2(-1.83919966724)
GO:0043410	positive regulation of MAPK cascade	biological process	3/234	6/681	0.33965	1	TRINITY_DN3135_c2_g3(1.84163748525),TRINITY_DN3238_c1_g1(4.68706194956),TRINITY_DN3355_c2_g2(-1.83919966724)	TRINITY_DN3135_c2_g3(1.84163748525),TRINITY_DN3238_c1_g1(4.68706194956),TRINITY_DN3355_c2_g2(-1.83919966724)
GO:0043648	dicarboxylic acid metabolic process	biological process	3/234	6/681	0.33965	1	TRINITY_DN2698_c1_g2(-3.10626025919),TRINITY_DN2698_c1_g3(-1.59157343931),TRINITY_DN3259_c1_g1(-1.24227933692)	TRINITY_DN2698_c1_g2(-3.10626025919),TRINITY_DN2698_c1_g3(-1.59157343931),TRINITY_DN3259_c1_g1(-1.24227933692)
GO:0044247	cellular polysaccharide catabolic process	biological process	3/234	6/681	0.33965	1	TRINITY_DN2955_c0_g3(1.04682740551),TRINITY_DN3409_c1_g1(-1.36361747936),TRINITY_DN3409_c1_g2(-2.12264257282)	TRINITY_DN2955_c0_g3(1.04682740551),TRINITY_DN3409_c1_g1(-1.36361747936),TRINITY_DN3409_c1_g2(-2.12264257282)
GO:0050808	synapse organization	biological process	3/234	6/681	0.33965	1	TRINITY_DN2948_c3_g2(-1.25152991183),TRINITY_DN3344_c2_g2(-1.07984282302),TRINITY_DN3416_c0_g3(-1.06697066005)	TRINITY_DN2948_c3_g2(-1.25152991183),TRINITY_DN3344_c2_g2(-1.07984282302),TRINITY_DN3416_c0_g3(-1.06697066005)
GO:0051053	negative regulation of DNA metabolic process	biological process	3/234	6/681	0.33965	1	TRINITY_DN1577_c0_g1(-1.27109622825),TRINITY_DN2834_c2_g1(-1.88177373969),TRINITY_DN3593_c3_g1(-1.127844984)	TRINITY_DN1577_c0_g1(-1.27109622825),TRINITY_DN2834_c2_g1(-1.88177373969),TRINITY_DN3593_c3_g1(-1.127844984)
GO:0051781	positive regulation of cell division	biological process	3/234	6/681	0.33965	1	TRINITY_DN2830_c1_g6(-2.81950059698),TRINITY_DN3034_c3_g2(-2.78869539746),TRINITY_DN3688_c1_g7(-2.38640377363)	TRINITY_DN2830_c1_g6(-2.81950059698),TRINITY_DN3034_c3_g2(-2.78869539746),TRINITY_DN3688_c1_g7(-2.38640377363)
GO:0060537	muscle tissue development	biological process	3/234	6/681	0.33965	1	TRINITY_DN2244_c0_g1(-2.14833104305),TRINITY_DN2670_c0_g1(-1.16807489944),TRINITY_DN2990_c3_g1(4.48637222765)	TRINITY_DN2244_c0_g1(-2.14833104305),TRINITY_DN2670_c0_g1(-1.16807489944),TRINITY_DN2990_c3_g1(4.48637222765)
GO:0061025	membrane fusion	biological process	3/234	6/681	0.33965	1	TRINITY_DN2521_c4_g1(-2.61442070653),TRINITY_DN2829_c3_g4(-2.33743191627),TRINITY_DN3118_c6_g1(-2.15189148233)	TRINITY_DN2521_c4_g1(-2.61442070653),TRINITY_DN2829_c3_g4(-2.33743191627),TRINITY_DN3118_c6_g1(-2.15189148233)
GO:2001252	positive regulation of chromosome organization	biological process	3/234	6/681	0.33965	1	TRINITY_DN1268_c0_g1(-2.06811775799),TRINITY_DN2830_c1_g6(-2.81950059698),TRINITY_DN3688_c1_g7(-2.38640377363)	TRINITY_DN1268_c0_g1(-2.06811775799),TRINITY_DN2830_c1_g6(-2.81950059698),TRINITY_DN3688_c1_g7(-2.38640377363)
GO:0000012	single strand break repair	biological process	1/234	1/681	0.34361	1	TRINITY_DN2894_c1_g4(-1.13651404581)	TRINITY_DN2894_c1_g4(-1.13651404581)
GO:0000054	ribosomal subunit export from nucleus	biological process	1/234	1/681	0.34361	1	TRINITY_DN3343_c1_g7(1.11505558557)	TRINITY_DN3343_c1_g7(1.11505558557)
GO:0000056	ribosomal small subunit export from nucleus	biological process	1/234	1/681	0.34361	1	TRINITY_DN3343_c1_g7(1.11505558557)	TRINITY_DN3343_c1_g7(1.11505558557)
GO:0000079	regulation of cyclin-dependent protein serine/threonine kinase activity	biological process	1/234	1/681	0.34361	1	TRINITY_DN1551_c0_g1(-2.62773240149)	TRINITY_DN1551_c0_g1(-2.62773240149)
GO:0000266	mitochondrial fission	biological process	1/234	1/681	0.34361	1	TRINITY_DN3461_c2_g1(-3.67850947106)	TRINITY_DN3461_c2_g1(-3.67850947106)
GO:0000378	RNA exon ligation	biological process	1/234	1/681	0.34361	1	TRINITY_DN3602_c4_g2(-2.95532582631)	TRINITY_DN3602_c4_g2(-2.95532582631)
GO:0000394	RNA splicing, via endonucleolytic cleavage and ligation	biological process	1/234	1/681	0.34361	1	TRINITY_DN3602_c4_g2(-2.95532582631)	TRINITY_DN3602_c4_g2(-2.95532582631)
GO:0000455	enzyme-directed rRNA pseudouridine synthesis	biological process	1/234	1/681	0.34361	1	TRINITY_DN3522_c0_g2(-1.86254793253)	TRINITY_DN3522_c0_g2(-1.86254793253)
GO:0000710	meiotic mismatch repair	biological process	1/234	1/681	0.34361	1	TRINITY_DN2834_c2_g1(-1.88177373969)	TRINITY_DN2834_c2_g1(-1.88177373969)
GO:0000712	resolution of meiotic recombination intermediates	biological process	1/234	1/681	0.34361	1	TRINITY_DN2986_c3_g1(-1.95868262638)	TRINITY_DN2986_c3_g1(-1.95868262638)
GO:0000968	tRNA exon ligation	biological process	1/234	1/681	0.34361	1	TRINITY_DN3602_c4_g2(-2.95532582631)	TRINITY_DN3602_c4_g2(-2.95532582631)
GO:0000971	tRNA exon ligation utilizing 2',3' cyclic phosphate of 5'-exon as source of linkage phosphate	biological process	1/234	1/681	0.34361	1	TRINITY_DN3602_c4_g2(-2.95532582631)	TRINITY_DN3602_c4_g2(-2.95532582631)
GO:0001503	ossification	biological process	1/234	1/681	0.34361	1	TRINITY_DN2990_c3_g1(4.48637222765)	TRINITY_DN2990_c3_g1(4.48637222765)
GO:0001569	branching involved in blood vessel morphogenesis	biological process	1/234	1/681	0.34361	1	TRINITY_DN2990_c3_g1(4.48637222765)	TRINITY_DN2990_c3_g1(4.48637222765)
GO:0001649	osteoblast differentiation	biological process	1/234	1/681	0.34361	1	TRINITY_DN2990_c3_g1(4.48637222765)	TRINITY_DN2990_c3_g1(4.48637222765)
GO:0001746	Bolwig's organ morphogenesis	biological process	1/234	1/681	0.34361	1	TRINITY_DN2990_c3_g1(4.48637222765)	TRINITY_DN2990_c3_g1(4.48637222765)
GO:0001752	compound eye photoreceptor fate commitment	biological process	1/234	1/681	0.34361	1	TRINITY_DN2990_c3_g1(4.48637222765)	TRINITY_DN2990_c3_g1(4.48637222765)
GO:0001838	embryonic epithelial tube formation	biological process	1/234	1/681	0.34361	1	TRINITY_DN1551_c0_g1(-2.62773240149)	TRINITY_DN1551_c0_g1(-2.62773240149)
GO:0001841	neural tube formation	biological process	1/234	1/681	0.34361	1	TRINITY_DN1551_c0_g1(-2.62773240149)	TRINITY_DN1551_c0_g1(-2.62773240149)
GO:0001843	neural tube closure	biological process	1/234	1/681	0.34361	1	TRINITY_DN1551_c0_g1(-2.62773240149)	TRINITY_DN1551_c0_g1(-2.62773240149)
GO:0001890	placenta development	biological process	1/234	1/681	0.34361	1	TRINITY_DN3602_c4_g2(-2.95532582631)	TRINITY_DN3602_c4_g2(-2.95532582631)
GO:0002053	positive regulation of mesenchymal cell proliferation	biological process	1/234	1/681	0.34361	1	TRINITY_DN2990_c3_g1(4.48637222765)	TRINITY_DN2990_c3_g1(4.48637222765)
GO:0002090	regulation of receptor internalization	biological process	1/234	1/681	0.34361	1	TRINITY_DN2559_c3_g1(-1.41187808043)	TRINITY_DN2559_c3_g1(-1.41187808043)
GO:0002092	positive regulation of receptor internalization	biological process	1/234	1/681	0.34361	1	TRINITY_DN2559_c3_g1(-1.41187808043)	TRINITY_DN2559_c3_g1(-1.41187808043)
GO:0002097	tRNA wobble base modification	biological process	1/234	1/681	0.34361	1	TRINITY_DN3002_c7_g7(1.15397086811)	TRINITY_DN3002_c7_g7(1.15397086811)
GO:0002101	tRNA wobble cytosine modification	biological process	1/234	1/681	0.34361	1	TRINITY_DN3002_c7_g7(1.15397086811)	TRINITY_DN3002_c7_g7(1.15397086811)
GO:0002127	tRNA wobble base cytosine methylation	biological process	1/234	1/681	0.34361	1	TRINITY_DN3002_c7_g7(1.15397086811)	TRINITY_DN3002_c7_g7(1.15397086811)
GO:0002168	instar larval development	biological process	1/234	1/681	0.34361	1	TRINITY_DN2990_c3_g1(4.48637222765)	TRINITY_DN2990_c3_g1(4.48637222765)
GO:0002237	response to molecule of bacterial origin	biological process	1/234	1/681	0.34361	1	TRINITY_DN1453_c0_g1(-2.82693098456)	TRINITY_DN1453_c0_g1(-2.82693098456)
GO:0002456	T cell mediated immunity	biological process	1/234	1/681	0.34361	1	TRINITY_DN2863_c0_g2(-1.17670982061)	TRINITY_DN2863_c0_g2(-1.17670982061)
GO:0002526	acute inflammatory response	biological process	1/234	1/681	0.34361	1	TRINITY_DN2863_c0_g2(-1.17670982061)	TRINITY_DN2863_c0_g2(-1.17670982061)
GO:0002673	regulation of acute inflammatory response	biological process	1/234	1/681	0.34361	1	TRINITY_DN2863_c0_g2(-1.17670982061)	TRINITY_DN2863_c0_g2(-1.17670982061)
GO:0002695	negative regulation of leukocyte activation	biological process	1/234	1/681	0.34361	1	TRINITY_DN2990_c3_g1(4.48637222765)	TRINITY_DN2990_c3_g1(4.48637222765)
GO:0002698	negative regulation of immune effector process	biological process	1/234	1/681	0.34361	1	TRINITY_DN2863_c0_g2(-1.17670982061)	TRINITY_DN2863_c0_g2(-1.17670982061)
GO:0002699	positive regulation of immune effector process	biological process	1/234	1/681	0.34361	1	TRINITY_DN2863_c0_g2(-1.17670982061)	TRINITY_DN2863_c0_g2(-1.17670982061)
GO:0002792	negative regulation of peptide secretion	biological process	1/234	1/681	0.34361	1	TRINITY_DN1453_c0_g1(-2.82693098456)	TRINITY_DN1453_c0_g1(-2.82693098456)
GO:0002920	regulation of humoral immune response	biological process	1/234	1/681	0.34361	1	TRINITY_DN2863_c0_g2(-1.17670982061)	TRINITY_DN2863_c0_g2(-1.17670982061)
GO:0002921	negative regulation of humoral immune response	biological process	1/234	1/681	0.34361	1	TRINITY_DN2863_c0_g2(-1.17670982061)	TRINITY_DN2863_c0_g2(-1.17670982061)
GO:0002946	tRNA C5-cytosine methylation	biological process	1/234	1/681	0.34361	1	TRINITY_DN3002_c7_g7(1.15397086811)	TRINITY_DN3002_c7_g7(1.15397086811)
GO:0003351	epithelial cilium movement	biological process	1/234	1/681	0.34361	1	TRINITY_DN2656_c0_g2(-4.58846026162)	TRINITY_DN2656_c0_g2(-4.58846026162)
GO:0003382	epithelial cell morphogenesis	biological process	1/234	1/681	0.34361	1	TRINITY_DN2990_c3_g1(4.48637222765)	TRINITY_DN2990_c3_g1(4.48637222765)
GO:0003399	cytoneme morphogenesis	biological process	1/234	1/681	0.34361	1	TRINITY_DN2990_c3_g1(4.48637222765)	TRINITY_DN2990_c3_g1(4.48637222765)
GO:0003406	retinal pigment epithelium development	biological process	1/234	1/681	0.34361	1	TRINITY_DN2990_c3_g1(4.48637222765)	TRINITY_DN2990_c3_g1(4.48637222765)
GO:0003407	neural retina development	biological process	1/234	1/681	0.34361	1	TRINITY_DN2990_c3_g1(4.48637222765)	TRINITY_DN2990_c3_g1(4.48637222765)
GO:0003413	chondrocyte differentiation involved in endochondral bone morphogenesis	biological process	1/234	1/681	0.34361	1	TRINITY_DN2990_c3_g1(4.48637222765)	TRINITY_DN2990_c3_g1(4.48637222765)
GO:0005978	glycogen biosynthetic process	biological process	1/234	1/681	0.34361	1	TRINITY_DN3502_c0_g1(-1.23001299537)	TRINITY_DN3502_c0_g1(-1.23001299537)
GO:0005980	glycogen catabolic process	biological process	1/234	1/681	0.34361	1	TRINITY_DN2955_c0_g3(1.04682740551)	TRINITY_DN2955_c0_g3(1.04682740551)
GO:0006012	galactose metabolic process	biological process	1/234	1/681	0.34361	1	TRINITY_DN3502_c0_g1(-1.23001299537)	TRINITY_DN3502_c0_g1(-1.23001299537)
GO:0006041	glucosamine metabolic process	biological process	1/234	1/681	0.34361	1	TRINITY_DN2610_c4_g1(-1.54090835941)	TRINITY_DN2610_c4_g1(-1.54090835941)
GO:0006043	glucosamine catabolic process	biological process	1/234	1/681	0.34361	1	TRINITY_DN2610_c4_g1(-1.54090835941)	TRINITY_DN2610_c4_g1(-1.54090835941)
GO:0006044	N-acetylglucosamine metabolic process	biological process	1/234	1/681	0.34361	1	TRINITY_DN2610_c4_g1(-1.54090835941)	TRINITY_DN2610_c4_g1(-1.54090835941)
GO:0006046	N-acetylglucosamine catabolic process	biological process	1/234	1/681	0.34361	1	TRINITY_DN2610_c4_g1(-1.54090835941)	TRINITY_DN2610_c4_g1(-1.54090835941)
GO:0006108	malate metabolic process	biological process	1/234	1/681	0.34361	1	TRINITY_DN3259_c1_g1(-1.24227933692)	TRINITY_DN3259_c1_g1(-1.24227933692)
GO:0006198	cAMP catabolic process	biological process	1/234	1/681	0.34361	1	TRINITY_DN3032_c1_g3(-1.81290474391)	TRINITY_DN3032_c1_g3(-1.81290474391)
GO:0006267	pre-replicative complex assembly involved in nuclear cell cycle DNA replication	biological process	1/234	1/681	0.34361	1	TRINITY_DN3172_c3_g4(-1.50849298535)	TRINITY_DN3172_c3_g4(-1.50849298535)
GO:0006270	DNA replication initiation	biological process	1/234	1/681	0.34361	1	TRINITY_DN3172_c3_g4(-1.50849298535)	TRINITY_DN3172_c3_g4(-1.50849298535)
GO:0006277	DNA amplification	biological process	1/234	1/681	0.34361	1	TRINITY_DN1577_c0_g1(-1.27109622825)	TRINITY_DN1577_c0_g1(-1.27109622825)
GO:0006285	base-excision repair, AP site formation	biological process	1/234	1/681	0.34361	1	TRINITY_DN3285_c2_g1(-1.58640393684)	TRINITY_DN3285_c2_g1(-1.58640393684)
GO:0006298	mismatch repair	biological process	1/234	1/681	0.34361	1	TRINITY_DN2834_c2_g1(-1.88177373969)	TRINITY_DN2834_c2_g1(-1.88177373969)
GO:0006307	DNA dealkylation involved in DNA repair	biological process	1/234	1/681	0.34361	1	TRINITY_DN3466_c5_g2(-1.56168631845)	TRINITY_DN3466_c5_g2(-1.56168631845)
GO:0006311	meiotic gene conversion	biological process	1/234	1/681	0.34361	1	TRINITY_DN2986_c3_g1(-1.95868262638)	TRINITY_DN2986_c3_g1(-1.95868262638)
GO:0006359	regulation of transcription by RNA polymerase III	biological process	1/234	1/681	0.34361	1	TRINITY_DN2818_c0_g1(-1.28984232755)	TRINITY_DN2818_c0_g1(-1.28984232755)
GO:0006388	tRNA splicing, via endonucleolytic cleavage and ligation	biological process	1/234	1/681	0.34361	1	TRINITY_DN3602_c4_g2(-2.95532582631)	TRINITY_DN3602_c4_g2(-2.95532582631)
GO:0006497	protein lipidation	biological process	1/234	1/681	0.34361	1	TRINITY_DN2767_c3_g3(-1.67248354228)	TRINITY_DN2767_c3_g3(-1.67248354228)
GO:0006505	GPI anchor metabolic process	biological process	1/234	1/681	0.34361	1	TRINITY_DN2767_c3_g3(-1.67248354228)	TRINITY_DN2767_c3_g3(-1.67248354228)
GO:0006506	GPI anchor biosynthetic process	biological process	1/234	1/681	0.34361	1	TRINITY_DN2767_c3_g3(-1.67248354228)	TRINITY_DN2767_c3_g3(-1.67248354228)
GO:0006515	protein quality control for misfolded or incompletely synthesized proteins	biological process	1/234	1/681	0.34361	1	TRINITY_DN3337_c0_g1(-1.84211313121)	TRINITY_DN3337_c0_g1(-1.84211313121)
GO:0006534	cysteine metabolic process	biological process	1/234	1/681	0.34361	1	TRINITY_DN3023_c1_g1(1.29467178693)	TRINITY_DN3023_c1_g1(1.29467178693)
GO:0006573	valine metabolic process	biological process	1/234	1/681	0.34361	1	TRINITY_DN2989_c0_g3(-1.94950554293)	TRINITY_DN2989_c0_g3(-1.94950554293)
GO:0006661	phosphatidylinositol biosynthetic process	biological process	1/234	1/681	0.34361	1	TRINITY_DN2767_c3_g3(-1.67248354228)	TRINITY_DN2767_c3_g3(-1.67248354228)
GO:0006825	copper ion transport	biological process	1/234	1/681	0.34361	1	TRINITY_DN3141_c1_g4(-1.27569617362)	TRINITY_DN3141_c1_g4(-1.27569617362)
GO:0006826	iron ion transport	biological process	1/234	1/681	0.34361	1	TRINITY_DN3455_c5_g4(-1.38140557462)	TRINITY_DN3455_c5_g4(-1.38140557462)
GO:0006880	intracellular sequestering of iron ion	biological process	1/234	1/681	0.34361	1	TRINITY_DN3455_c5_g4(-1.38140557462)	TRINITY_DN3455_c5_g4(-1.38140557462)
GO:0006890	retrograde vesicle-mediated transport, Golgi to ER	biological process	1/234	1/681	0.34361	1	TRINITY_DN3118_c6_g1(-2.15189148233)	TRINITY_DN3118_c6_g1(-2.15189148233)
GO:0006956	complement activation	biological process	1/234	1/681	0.34361	1	TRINITY_DN2863_c0_g2(-1.17670982061)	TRINITY_DN2863_c0_g2(-1.17670982061)
GO:0007204	positive regulation of cytosolic calcium ion concentration	biological process	1/234	1/681	0.34361	1	TRINITY_DN3032_c1_g3(-1.81290474391)	TRINITY_DN3032_c1_g3(-1.81290474391)
GO:0007227	signal transduction downstream of smoothened	biological process	1/234	1/681	0.34361	1	TRINITY_DN2990_c3_g1(4.48637222765)	TRINITY_DN2990_c3_g1(4.48637222765)
GO:0007228	positive regulation of hh target transcription factor activity	biological process	1/234	1/681	0.34361	1	TRINITY_DN2990_c3_g1(4.48637222765)	TRINITY_DN2990_c3_g1(4.48637222765)
GO:0007280	pole cell migration	biological process	1/234	1/681	0.34361	1	TRINITY_DN2990_c3_g1(4.48637222765)	TRINITY_DN2990_c3_g1(4.48637222765)
GO:0007288	sperm axoneme assembly	biological process	1/234	1/681	0.34361	1	TRINITY_DN3282_c0_g4(1.20593803666)	TRINITY_DN3282_c0_g4(1.20593803666)
GO:0007304	chorion-containing eggshell formation	biological process	1/234	1/681	0.34361	1	TRINITY_DN1577_c0_g1(-1.27109622825)	TRINITY_DN1577_c0_g1(-1.27109622825)
GO:0007306	eggshell chorion assembly	biological process	1/234	1/681	0.34361	1	TRINITY_DN1577_c0_g1(-1.27109622825)	TRINITY_DN1577_c0_g1(-1.27109622825)
GO:0007307	eggshell chorion gene amplification	biological process	1/234	1/681	0.34361	1	TRINITY_DN1577_c0_g1(-1.27109622825)	TRINITY_DN1577_c0_g1(-1.27109622825)
GO:0007338	single fertilization	biological process	1/234	1/681	0.34361	1	TRINITY_DN2521_c4_g1(-2.61442070653)	TRINITY_DN2521_c4_g1(-2.61442070653)
GO:0007342	fusion of sperm to egg plasma membrane involved in single fertilization	biological process	1/234	1/681	0.34361	1	TRINITY_DN2521_c4_g1(-2.61442070653)	TRINITY_DN2521_c4_g1(-2.61442070653)
GO:0007386	compartment pattern specification	biological process	1/234	1/681	0.34361	1	TRINITY_DN2990_c3_g1(4.48637222765)	TRINITY_DN2990_c3_g1(4.48637222765)
GO:0007418	ventral midline development	biological process	1/234	1/681	0.34361	1	TRINITY_DN2990_c3_g1(4.48637222765)	TRINITY_DN2990_c3_g1(4.48637222765)
GO:0007427	epithelial cell migration, open tracheal system	biological process	1/234	1/681	0.34361	1	TRINITY_DN2990_c3_g1(4.48637222765)	TRINITY_DN2990_c3_g1(4.48637222765)
GO:0007440	foregut morphogenesis	biological process	1/234	1/681	0.34361	1	TRINITY_DN2990_c3_g1(4.48637222765)	TRINITY_DN2990_c3_g1(4.48637222765)
GO:0007442	hindgut morphogenesis	biological process	1/234	1/681	0.34361	1	TRINITY_DN2990_c3_g1(4.48637222765)	TRINITY_DN2990_c3_g1(4.48637222765)
GO:0007446	imaginal disc growth	biological process	1/234	1/681	0.34361	1	TRINITY_DN2990_c3_g1(4.48637222765)	TRINITY_DN2990_c3_g1(4.48637222765)
GO:0007448	anterior/posterior pattern specification, imaginal disc	biological process	1/234	1/681	0.34361	1	TRINITY_DN2990_c3_g1(4.48637222765)	TRINITY_DN2990_c3_g1(4.48637222765)
GO:0007449	proximal/distal pattern formation, imaginal disc	biological process	1/234	1/681	0.34361	1	TRINITY_DN2990_c3_g1(4.48637222765)	TRINITY_DN2990_c3_g1(4.48637222765)
GO:0007458	progression of morphogenetic furrow involved in compound eye morphogenesis	biological process	1/234	1/681	0.34361	1	TRINITY_DN2990_c3_g1(4.48637222765)	TRINITY_DN2990_c3_g1(4.48637222765)
GO:0007460	R8 cell fate commitment	biological process	1/234	1/681	0.34361	1	TRINITY_DN2990_c3_g1(4.48637222765)	TRINITY_DN2990_c3_g1(4.48637222765)
GO:0007473	wing disc proximal/distal pattern formation	biological process	1/234	1/681	0.34361	1	TRINITY_DN2990_c3_g1(4.48637222765)	TRINITY_DN2990_c3_g1(4.48637222765)
GO:0007474	imaginal disc-derived wing vein specification	biological process	1/234	1/681	0.34361	1	TRINITY_DN2990_c3_g1(4.48637222765)	TRINITY_DN2990_c3_g1(4.48637222765)
GO:0007478	leg disc morphogenesis	biological process	1/234	1/681	0.34361	1	TRINITY_DN2990_c3_g1(4.48637222765)	TRINITY_DN2990_c3_g1(4.48637222765)
GO:0007487	analia development	biological process	1/234	1/681	0.34361	1	TRINITY_DN2990_c3_g1(4.48637222765)	TRINITY_DN2990_c3_g1(4.48637222765)
GO:0007506	gonadal mesoderm development	biological process	1/234	1/681	0.34361	1	TRINITY_DN2990_c3_g1(4.48637222765)	TRINITY_DN2990_c3_g1(4.48637222765)
GO:0007591	molting cycle, chitin-based cuticle	biological process	1/234	1/681	0.34361	1	TRINITY_DN1445_c0_g1(-3.12136795106)	TRINITY_DN1445_c0_g1(-3.12136795106)
GO:0008064	regulation of actin polymerization or depolymerization	biological process	1/234	1/681	0.34361	1	TRINITY_DN2624_c3_g2(-1.7395971044)	TRINITY_DN2624_c3_g2(-1.7395971044)
GO:0008154	actin polymerization or depolymerization	biological process	1/234	1/681	0.34361	1	TRINITY_DN2624_c3_g2(-1.7395971044)	TRINITY_DN2624_c3_g2(-1.7395971044)
GO:0008299	isoprenoid biosynthetic process	biological process	1/234	1/681	0.34361	1	TRINITY_DN2683_c2_g1(1.02068712023)	TRINITY_DN2683_c2_g1(1.02068712023)
GO:0008354	germ cell migration	biological process	1/234	1/681	0.34361	1	TRINITY_DN2990_c3_g1(4.48637222765)	TRINITY_DN2990_c3_g1(4.48637222765)
GO:0008544	epidermis development	biological process	1/234	1/681	0.34361	1	TRINITY_DN2990_c3_g1(4.48637222765)	TRINITY_DN2990_c3_g1(4.48637222765)
GO:0009214	cyclic nucleotide catabolic process	biological process	1/234	1/681	0.34361	1	TRINITY_DN3032_c1_g3(-1.81290474391)	TRINITY_DN3032_c1_g3(-1.81290474391)
GO:0009251	glucan catabolic process	biological process	1/234	1/681	0.34361	1	TRINITY_DN2955_c0_g3(1.04682740551)	TRINITY_DN2955_c0_g3(1.04682740551)
GO:0009403	toxin biosynthetic process	biological process	1/234	1/681	0.34361	1	TRINITY_DN6992_c0_g1(-13.2230001252)	TRINITY_DN6992_c0_g1(-13.2230001252)
GO:0009404	toxin metabolic process	biological process	1/234	1/681	0.34361	1	TRINITY_DN6992_c0_g1(-13.2230001252)	TRINITY_DN6992_c0_g1(-13.2230001252)
GO:0009595	detection of biotic stimulus	biological process	1/234	1/681	0.34361	1	TRINITY_DN1453_c0_g1(-2.82693098456)	TRINITY_DN1453_c0_g1(-2.82693098456)
GO:0009690	cytokinin metabolic process	biological process	1/234	1/681	0.34361	1	TRINITY_DN980_c0_g1(1.9423713149)	TRINITY_DN980_c0_g1(1.9423713149)
GO:0009691	cytokinin biosynthetic process	biological process	1/234	1/681	0.34361	1	TRINITY_DN980_c0_g1(1.9423713149)	TRINITY_DN980_c0_g1(1.9423713149)
GO:0009744	response to sucrose	biological process	1/234	1/681	0.34361	1	TRINITY_DN3172_c3_g4(-1.50849298535)	TRINITY_DN3172_c3_g4(-1.50849298535)
GO:0009772	photosynthetic electron transport in photosystem II	biological process	1/234	1/681	0.34361	1	TRINITY_DN2522_c0_g1(1.71353669634)	TRINITY_DN2522_c0_g1(1.71353669634)
GO:0009832	plant-type cell wall biogenesis	biological process	1/234	1/681	0.34361	1	TRINITY_DN3722_c1_g7(-2.33487818804)	TRINITY_DN3722_c1_g7(-2.33487818804)
GO:0009834	plant-type secondary cell wall biogenesis	biological process	1/234	1/681	0.34361	1	TRINITY_DN3722_c1_g7(-2.33487818804)	TRINITY_DN3722_c1_g7(-2.33487818804)
GO:0009846	pollen germination	biological process	1/234	1/681	0.34361	1	TRINITY_DN2767_c3_g3(-1.67248354228)	TRINITY_DN2767_c3_g3(-1.67248354228)
GO:0009954	proximal/distal pattern formation	biological process	1/234	1/681	0.34361	1	TRINITY_DN2990_c3_g1(4.48637222765)	TRINITY_DN2990_c3_g1(4.48637222765)
GO:0010020	chloroplast fission	biological process	1/234	1/681	0.34361	1	TRINITY_DN3081_c0_g1(1.24454299096)	TRINITY_DN3081_c0_g1(1.24454299096)
GO:0010032	meiotic chromosome condensation	biological process	1/234	1/681	0.34361	1	TRINITY_DN2674_c3_g1(-1.20247600187)	TRINITY_DN2674_c3_g1(-1.20247600187)
GO:0010119	regulation of stomatal movement	biological process	1/234	1/681	0.34361	1	TRINITY_DN3324_c1_g1(-1.19910771168)	TRINITY_DN3324_c1_g1(-1.19910771168)
GO:0010150	leaf senescence	biological process	1/234	1/681	0.34361	1	TRINITY_DN2670_c2_g6(-1.02619526061)	TRINITY_DN2670_c2_g6(-1.02619526061)
GO:0010152	pollen maturation	biological process	1/234	1/681	0.34361	1	TRINITY_DN3324_c1_g1(-1.19910771168)	TRINITY_DN3324_c1_g1(-1.19910771168)
GO:0010359	regulation of anion channel activity	biological process	1/234	1/681	0.34361	1	TRINITY_DN3324_c1_g1(-1.19910771168)	TRINITY_DN3324_c1_g1(-1.19910771168)
GO:0010411	xyloglucan metabolic process	biological process	1/234	1/681	0.34361	1	TRINITY_DN3722_c1_g7(-2.33487818804)	TRINITY_DN3722_c1_g7(-2.33487818804)
GO:0010463	mesenchymal cell proliferation	biological process	1/234	1/681	0.34361	1	TRINITY_DN2990_c3_g1(4.48637222765)	TRINITY_DN2990_c3_g1(4.48637222765)
GO:0010464	regulation of mesenchymal cell proliferation	biological process	1/234	1/681	0.34361	1	TRINITY_DN2990_c3_g1(4.48637222765)	TRINITY_DN2990_c3_g1(4.48637222765)
GO:0010522	regulation of calcium ion transport into cytosol	biological process	1/234	1/681	0.34361	1	TRINITY_DN3032_c1_g3(-1.81290474391)	TRINITY_DN3032_c1_g3(-1.81290474391)
GO:0010524	positive regulation of calcium ion transport into cytosol	biological process	1/234	1/681	0.34361	1	TRINITY_DN3032_c1_g3(-1.81290474391)	TRINITY_DN3032_c1_g3(-1.81290474391)
GO:0010566	regulation of ketone biosynthetic process	biological process	1/234	1/681	0.34361	1	TRINITY_DN1267_c0_g1(-3.74317437745)	TRINITY_DN1267_c0_g1(-3.74317437745)
GO:0010586	miRNA metabolic process	biological process	1/234	1/681	0.34361	1	TRINITY_DN3496_c4_g3(-1.18941672544)	TRINITY_DN3496_c4_g3(-1.18941672544)
GO:0010587	miRNA catabolic process	biological process	1/234	1/681	0.34361	1	TRINITY_DN3496_c4_g3(-1.18941672544)	TRINITY_DN3496_c4_g3(-1.18941672544)
GO:0010656	negative regulation of muscle cell apoptotic process	biological process	1/234	1/681	0.34361	1	TRINITY_DN1267_c0_g1(-3.74317437745)	TRINITY_DN1267_c0_g1(-3.74317437745)
GO:0010657	muscle cell apoptotic process	biological process	1/234	1/681	0.34361	1	TRINITY_DN1267_c0_g1(-3.74317437745)	TRINITY_DN1267_c0_g1(-3.74317437745)
GO:0010658	striated muscle cell apoptotic process	biological process	1/234	1/681	0.34361	1	TRINITY_DN1267_c0_g1(-3.74317437745)	TRINITY_DN1267_c0_g1(-3.74317437745)
GO:0010659	cardiac muscle cell apoptotic process	biological process	1/234	1/681	0.34361	1	TRINITY_DN1267_c0_g1(-3.74317437745)	TRINITY_DN1267_c0_g1(-3.74317437745)
GO:0010660	regulation of muscle cell apoptotic process	biological process	1/234	1/681	0.34361	1	TRINITY_DN1267_c0_g1(-3.74317437745)	TRINITY_DN1267_c0_g1(-3.74317437745)
GO:0010662	regulation of striated muscle cell apoptotic process	biological process	1/234	1/681	0.34361	1	TRINITY_DN1267_c0_g1(-3.74317437745)	TRINITY_DN1267_c0_g1(-3.74317437745)
GO:0010664	negative regulation of striated muscle cell apoptotic process	biological process	1/234	1/681	0.34361	1	TRINITY_DN1267_c0_g1(-3.74317437745)	TRINITY_DN1267_c0_g1(-3.74317437745)
GO:0010665	regulation of cardiac muscle cell apoptotic process	biological process	1/234	1/681	0.34361	1	TRINITY_DN1267_c0_g1(-3.74317437745)	TRINITY_DN1267_c0_g1(-3.74317437745)
GO:0010667	negative regulation of cardiac muscle cell apoptotic process	biological process	1/234	1/681	0.34361	1	TRINITY_DN1267_c0_g1(-3.74317437745)	TRINITY_DN1267_c0_g1(-3.74317437745)
GO:0010712	regulation of collagen metabolic process	biological process	1/234	1/681	0.34361	1	TRINITY_DN2990_c3_g1(4.48637222765)	TRINITY_DN2990_c3_g1(4.48637222765)
GO:0010714	positive regulation of collagen metabolic process	biological process	1/234	1/681	0.34361	1	TRINITY_DN2990_c3_g1(4.48637222765)	TRINITY_DN2990_c3_g1(4.48637222765)
GO:0010835	regulation of protein ADP-ribosylation	biological process	1/234	1/681	0.34361	1	TRINITY_DN1268_c0_g1(-2.06811775799)	TRINITY_DN1268_c0_g1(-2.06811775799)
GO:0010836	negative regulation of protein ADP-ribosylation	biological process	1/234	1/681	0.34361	1	TRINITY_DN1268_c0_g1(-2.06811775799)	TRINITY_DN1268_c0_g1(-2.06811775799)
GO:0014013	regulation of gliogenesis	biological process	1/234	1/681	0.34361	1	TRINITY_DN2990_c3_g1(4.48637222765)	TRINITY_DN2990_c3_g1(4.48637222765)
GO:0014020	primary neural tube formation	biological process	1/234	1/681	0.34361	1	TRINITY_DN1551_c0_g1(-2.62773240149)	TRINITY_DN1551_c0_g1(-2.62773240149)
GO:0015669	gas transport	biological process	1/234	1/681	0.34361	1	TRINITY_DN2854_c3_g4(-1.03193046162)	TRINITY_DN2854_c3_g4(-1.03193046162)
GO:0015671	oxygen transport	biological process	1/234	1/681	0.34361	1	TRINITY_DN2854_c3_g4(-1.03193046162)	TRINITY_DN2854_c3_g4(-1.03193046162)
GO:0015689	molybdate ion transport	biological process	1/234	1/681	0.34361	1	TRINITY_DN2981_c1_g1(-1.28653934136)	TRINITY_DN2981_c1_g1(-1.28653934136)
GO:0015729	oxaloacetate transport	biological process	1/234	1/681	0.34361	1	TRINITY_DN1269_c0_g1(-2.69702190868)	TRINITY_DN1269_c0_g1(-2.69702190868)
GO:0016045	detection of bacterium	biological process	1/234	1/681	0.34361	1	TRINITY_DN1453_c0_g1(-2.82693098456)	TRINITY_DN1453_c0_g1(-2.82693098456)
GO:0016108	tetraterpenoid metabolic process	biological process	1/234	1/681	0.34361	1	TRINITY_DN2683_c2_g1(1.02068712023)	TRINITY_DN2683_c2_g1(1.02068712023)
GO:0016109	tetraterpenoid biosynthetic process	biological process	1/234	1/681	0.34361	1	TRINITY_DN2683_c2_g1(1.02068712023)	TRINITY_DN2683_c2_g1(1.02068712023)
GO:0016114	terpenoid biosynthetic process	biological process	1/234	1/681	0.34361	1	TRINITY_DN2683_c2_g1(1.02068712023)	TRINITY_DN2683_c2_g1(1.02068712023)
GO:0016116	carotenoid metabolic process	biological process	1/234	1/681	0.34361	1	TRINITY_DN2683_c2_g1(1.02068712023)	TRINITY_DN2683_c2_g1(1.02068712023)
GO:0016117	carotenoid biosynthetic process	biological process	1/234	1/681	0.34361	1	TRINITY_DN2683_c2_g1(1.02068712023)	TRINITY_DN2683_c2_g1(1.02068712023)
GO:0016127	sterol catabolic process	biological process	1/234	1/681	0.34361	1	TRINITY_DN2917_c3_g1(-1.13937325966)	TRINITY_DN2917_c3_g1(-1.13937325966)
GO:0016143	S-glycoside metabolic process	biological process	1/234	1/681	0.34361	1	TRINITY_DN3463_c3_g2(1.40977209201)	TRINITY_DN3463_c3_g2(1.40977209201)
GO:0016144	S-glycoside biosynthetic process	biological process	1/234	1/681	0.34361	1	TRINITY_DN3463_c3_g2(1.40977209201)	TRINITY_DN3463_c3_g2(1.40977209201)
GO:0016254	preassembly of GPI anchor in ER membrane	biological process	1/234	1/681	0.34361	1	TRINITY_DN2767_c3_g3(-1.67248354228)	TRINITY_DN2767_c3_g3(-1.67248354228)
GO:0016335	morphogenesis of larval imaginal disc epithelium	biological process	1/234	1/681	0.34361	1	TRINITY_DN2990_c3_g1(4.48637222765)	TRINITY_DN2990_c3_g1(4.48637222765)
GO:0016575	histone deacetylation	biological process	1/234	1/681	0.34361	1	TRINITY_DN3034_c4_g1(-2.34785465768)	TRINITY_DN3034_c4_g1(-2.34785465768)
GO:0016598	protein arginylation	biological process	1/234	1/681	0.34361	1	TRINITY_DN2670_c2_g6(-1.02619526061)	TRINITY_DN2670_c2_g6(-1.02619526061)
GO:0018105	peptidyl-serine phosphorylation	biological process	1/234	1/681	0.34361	1	TRINITY_DN3324_c1_g1(-1.19910771168)	TRINITY_DN3324_c1_g1(-1.19910771168)
GO:0018188	peptidyl-proline di-hydroxylation	biological process	1/234	1/681	0.34361	1	TRINITY_DN1761_c0_g1(1.048356604)	TRINITY_DN1761_c0_g1(1.048356604)
GO:0018904	ether metabolic process	biological process	1/234	1/681	0.34361	1	TRINITY_DN6992_c0_g1(-13.2230001252)	TRINITY_DN6992_c0_g1(-13.2230001252)
GO:0018990	ecdysis, chitin-based cuticle	biological process	1/234	1/681	0.34361	1	TRINITY_DN1445_c0_g1(-3.12136795106)	TRINITY_DN1445_c0_g1(-3.12136795106)
GO:0019344	cysteine biosynthetic process	biological process	1/234	1/681	0.34361	1	TRINITY_DN3023_c1_g1(1.29467178693)	TRINITY_DN3023_c1_g1(1.29467178693)
GO:0019674	NAD metabolic process	biological process	1/234	1/681	0.34361	1	TRINITY_DN3569_c5_g1(-2.53028689894)	TRINITY_DN3569_c5_g1(-2.53028689894)
GO:0019757	glycosinolate metabolic process	biological process	1/234	1/681	0.34361	1	TRINITY_DN3463_c3_g2(1.40977209201)	TRINITY_DN3463_c3_g2(1.40977209201)
GO:0019758	glycosinolate biosynthetic process	biological process	1/234	1/681	0.34361	1	TRINITY_DN3463_c3_g2(1.40977209201)	TRINITY_DN3463_c3_g2(1.40977209201)
GO:0019760	glucosinolate metabolic process	biological process	1/234	1/681	0.34361	1	TRINITY_DN3463_c3_g2(1.40977209201)	TRINITY_DN3463_c3_g2(1.40977209201)
GO:0019761	glucosinolate biosynthetic process	biological process	1/234	1/681	0.34361	1	TRINITY_DN3463_c3_g2(1.40977209201)	TRINITY_DN3463_c3_g2(1.40977209201)
GO:0021537	telencephalon development	biological process	1/234	1/681	0.34361	1	TRINITY_DN2990_c3_g1(4.48637222765)	TRINITY_DN2990_c3_g1(4.48637222765)
GO:0021591	ventricular system development	biological process	1/234	1/681	0.34361	1	TRINITY_DN3282_c0_g4(1.20593803666)	TRINITY_DN3282_c0_g4(1.20593803666)
GO:0021915	neural tube development	biological process	1/234	1/681	0.34361	1	TRINITY_DN1551_c0_g1(-2.62773240149)	TRINITY_DN1551_c0_g1(-2.62773240149)
GO:0021952	central nervous system projection neuron axonogenesis	biological process	1/234	1/681	0.34361	1	TRINITY_DN2990_c3_g1(4.48637222765)	TRINITY_DN2990_c3_g1(4.48637222765)
GO:0021953	central nervous system neuron differentiation	biological process	1/234	1/681	0.34361	1	TRINITY_DN2990_c3_g1(4.48637222765)	TRINITY_DN2990_c3_g1(4.48637222765)
GO:0021954	central nervous system neuron development	biological process	1/234	1/681	0.34361	1	TRINITY_DN2990_c3_g1(4.48637222765)	TRINITY_DN2990_c3_g1(4.48637222765)
GO:0021955	central nervous system neuron axonogenesis	biological process	1/234	1/681	0.34361	1	TRINITY_DN2990_c3_g1(4.48637222765)	TRINITY_DN2990_c3_g1(4.48637222765)
GO:0021960	anterior commissure morphogenesis	biological process	1/234	1/681	0.34361	1	TRINITY_DN2990_c3_g1(4.48637222765)	TRINITY_DN2990_c3_g1(4.48637222765)
GO:0022404	molting cycle process	biological process	1/234	1/681	0.34361	1	TRINITY_DN1445_c0_g1(-3.12136795106)	TRINITY_DN1445_c0_g1(-3.12136795106)
GO:0030026	cellular manganese ion homeostasis	biological process	1/234	1/681	0.34361	1	TRINITY_DN3455_c5_g4(-1.38140557462)	TRINITY_DN3455_c5_g4(-1.38140557462)
GO:0030041	actin filament polymerization	biological process	1/234	1/681	0.34361	1	TRINITY_DN2624_c3_g2(-1.7395971044)	TRINITY_DN2624_c3_g2(-1.7395971044)
GO:0030449	regulation of complement activation	biological process	1/234	1/681	0.34361	1	TRINITY_DN2863_c0_g2(-1.17670982061)	TRINITY_DN2863_c0_g2(-1.17670982061)
GO:0030488	tRNA methylation	biological process	1/234	1/681	0.34361	1	TRINITY_DN3002_c7_g7(1.15397086811)	TRINITY_DN3002_c7_g7(1.15397086811)
GO:0030703	eggshell formation	biological process	1/234	1/681	0.34361	1	TRINITY_DN1577_c0_g1(-1.27109622825)	TRINITY_DN1577_c0_g1(-1.27109622825)
GO:0030704	vitelline membrane formation	biological process	1/234	1/681	0.34361	1	TRINITY_DN2990_c3_g1(4.48637222765)	TRINITY_DN2990_c3_g1(4.48637222765)
GO:0030713	ovarian follicle cell stalk formation	biological process	1/234	1/681	0.34361	1	TRINITY_DN2990_c3_g1(4.48637222765)	TRINITY_DN2990_c3_g1(4.48637222765)
GO:0030832	regulation of actin filament length	biological process	1/234	1/681	0.34361	1	TRINITY_DN2624_c3_g2(-1.7395971044)	TRINITY_DN2624_c3_g2(-1.7395971044)
GO:0030833	regulation of actin filament polymerization	biological process	1/234	1/681	0.34361	1	TRINITY_DN2624_c3_g2(-1.7395971044)	TRINITY_DN2624_c3_g2(-1.7395971044)
GO:0030838	positive regulation of actin filament polymerization	biological process	1/234	1/681	0.34361	1	TRINITY_DN2624_c3_g2(-1.7395971044)	TRINITY_DN2624_c3_g2(-1.7395971044)
GO:0030903	notochord development	biological process	1/234	1/681	0.34361	1	TRINITY_DN1551_c0_g1(-2.62773240149)	TRINITY_DN1551_c0_g1(-2.62773240149)
GO:0031063	regulation of histone deacetylation	biological process	1/234	1/681	0.34361	1	TRINITY_DN3034_c4_g1(-2.34785465768)	TRINITY_DN3034_c4_g1(-2.34785465768)
GO:0031064	negative regulation of histone deacetylation	biological process	1/234	1/681	0.34361	1	TRINITY_DN3034_c4_g1(-2.34785465768)	TRINITY_DN3034_c4_g1(-2.34785465768)
GO:0031076	embryonic camera-type eye development	biological process	1/234	1/681	0.34361	1	TRINITY_DN2990_c3_g1(4.48637222765)	TRINITY_DN2990_c3_g1(4.48637222765)
GO:0031086	nuclear-transcribed mRNA catabolic process, deadenylation-independent decay	biological process	1/234	1/681	0.34361	1	TRINITY_DN3496_c4_g3(-1.18941672544)	TRINITY_DN3496_c4_g3(-1.18941672544)
GO:0031087	deadenylation-independent decapping of nuclear-transcribed mRNA	biological process	1/234	1/681	0.34361	1	TRINITY_DN3496_c4_g3(-1.18941672544)	TRINITY_DN3496_c4_g3(-1.18941672544)
GO:0031119	tRNA pseudouridine synthesis	biological process	1/234	1/681	0.34361	1	TRINITY_DN3522_c0_g2(-1.86254793253)	TRINITY_DN3522_c0_g2(-1.86254793253)
GO:0031145	anaphase-promoting complex-dependent catabolic process	biological process	1/234	1/681	0.34361	1	TRINITY_DN2830_c1_g6(-2.81950059698)	TRINITY_DN2830_c1_g6(-2.81950059698)
GO:0031167	rRNA methylation	biological process	1/234	1/681	0.34361	1	TRINITY_DN3002_c7_g7(1.15397086811)	TRINITY_DN3002_c7_g7(1.15397086811)
GO:0031268	pseudopodium organization	biological process	1/234	1/681	0.34361	1	TRINITY_DN3032_c1_g3(-1.81290474391)	TRINITY_DN3032_c1_g3(-1.81290474391)
GO:0031269	pseudopodium assembly	biological process	1/234	1/681	0.34361	1	TRINITY_DN3032_c1_g3(-1.81290474391)	TRINITY_DN3032_c1_g3(-1.81290474391)
GO:0031271	lateral pseudopodium assembly	biological process	1/234	1/681	0.34361	1	TRINITY_DN3032_c1_g3(-1.81290474391)	TRINITY_DN3032_c1_g3(-1.81290474391)
GO:0031272	regulation of pseudopodium assembly	biological process	1/234	1/681	0.34361	1	TRINITY_DN3032_c1_g3(-1.81290474391)	TRINITY_DN3032_c1_g3(-1.81290474391)
GO:0031273	negative regulation of pseudopodium assembly	biological process	1/234	1/681	0.34361	1	TRINITY_DN3032_c1_g3(-1.81290474391)	TRINITY_DN3032_c1_g3(-1.81290474391)
GO:0031275	regulation of lateral pseudopodium assembly	biological process	1/234	1/681	0.34361	1	TRINITY_DN3032_c1_g3(-1.81290474391)	TRINITY_DN3032_c1_g3(-1.81290474391)
GO:0031276	negative regulation of lateral pseudopodium assembly	biological process	1/234	1/681	0.34361	1	TRINITY_DN3032_c1_g3(-1.81290474391)	TRINITY_DN3032_c1_g3(-1.81290474391)
GO:0031288	sorocarp morphogenesis	biological process	1/234	1/681	0.34361	1	TRINITY_DN3032_c1_g3(-1.81290474391)	TRINITY_DN3032_c1_g3(-1.81290474391)
GO:0031396	regulation of protein ubiquitination	biological process	1/234	1/681	0.34361	1	TRINITY_DN2990_c3_g1(4.48637222765)	TRINITY_DN2990_c3_g1(4.48637222765)
GO:0031397	negative regulation of protein ubiquitination	biological process	1/234	1/681	0.34361	1	TRINITY_DN2990_c3_g1(4.48637222765)	TRINITY_DN2990_c3_g1(4.48637222765)
GO:0031407	oxylipin metabolic process	biological process	1/234	1/681	0.34361	1	TRINITY_DN1383_c0_g2(-5.09453204951)	TRINITY_DN1383_c0_g2(-5.09453204951)
GO:0031408	oxylipin biosynthetic process	biological process	1/234	1/681	0.34361	1	TRINITY_DN1383_c0_g2(-5.09453204951)	TRINITY_DN1383_c0_g2(-5.09453204951)
GO:0031623	receptor internalization	biological process	1/234	1/681	0.34361	1	TRINITY_DN2559_c3_g1(-1.41187808043)	TRINITY_DN2559_c3_g1(-1.41187808043)
GO:0031929	TOR signaling	biological process	1/234	1/681	0.34361	1	TRINITY_DN3337_c0_g1(-1.84211313121)	TRINITY_DN3337_c0_g1(-1.84211313121)
GO:0032206	positive regulation of telomere maintenance	biological process	1/234	1/681	0.34361	1	TRINITY_DN1268_c0_g1(-2.06811775799)	TRINITY_DN1268_c0_g1(-2.06811775799)
GO:0032212	positive regulation of telomere maintenance via telomerase	biological process	1/234	1/681	0.34361	1	TRINITY_DN1268_c0_g1(-2.06811775799)	TRINITY_DN1268_c0_g1(-2.06811775799)
GO:0032490	detection of molecule of bacterial origin	biological process	1/234	1/681	0.34361	1	TRINITY_DN1453_c0_g1(-2.82693098456)	TRINITY_DN1453_c0_g1(-2.82693098456)
GO:0032493	response to bacterial lipoprotein	biological process	1/234	1/681	0.34361	1	TRINITY_DN1453_c0_g1(-2.82693098456)	TRINITY_DN1453_c0_g1(-2.82693098456)
GO:0032877	positive regulation of DNA endoreduplication	biological process	1/234	1/681	0.34361	1	TRINITY_DN3034_c3_g2(-2.78869539746)	TRINITY_DN3034_c3_g2(-2.78869539746)
GO:0032945	negative regulation of mononuclear cell proliferation	biological process	1/234	1/681	0.34361	1	TRINITY_DN2990_c3_g1(4.48637222765)	TRINITY_DN2990_c3_g1(4.48637222765)
GO:0032963	collagen metabolic process	biological process	1/234	1/681	0.34361	1	TRINITY_DN2990_c3_g1(4.48637222765)	TRINITY_DN2990_c3_g1(4.48637222765)
GO:0032964	collagen biosynthetic process	biological process	1/234	1/681	0.34361	1	TRINITY_DN2990_c3_g1(4.48637222765)	TRINITY_DN2990_c3_g1(4.48637222765)
GO:0032965	regulation of collagen biosynthetic process	biological process	1/234	1/681	0.34361	1	TRINITY_DN2990_c3_g1(4.48637222765)	TRINITY_DN2990_c3_g1(4.48637222765)
GO:0032967	positive regulation of collagen biosynthetic process	biological process	1/234	1/681	0.34361	1	TRINITY_DN2990_c3_g1(4.48637222765)	TRINITY_DN2990_c3_g1(4.48637222765)
GO:0033077	T cell differentiation in thymus	biological process	1/234	1/681	0.34361	1	TRINITY_DN2990_c3_g1(4.48637222765)	TRINITY_DN2990_c3_g1(4.48637222765)
GO:0033079	immature T cell proliferation	biological process	1/234	1/681	0.34361	1	TRINITY_DN2990_c3_g1(4.48637222765)	TRINITY_DN2990_c3_g1(4.48637222765)
GO:0033080	immature T cell proliferation in thymus	biological process	1/234	1/681	0.34361	1	TRINITY_DN2990_c3_g1(4.48637222765)	TRINITY_DN2990_c3_g1(4.48637222765)
GO:0033081	regulation of T cell differentiation in thymus	biological process	1/234	1/681	0.34361	1	TRINITY_DN2990_c3_g1(4.48637222765)	TRINITY_DN2990_c3_g1(4.48637222765)
GO:0033083	regulation of immature T cell proliferation	biological process	1/234	1/681	0.34361	1	TRINITY_DN2990_c3_g1(4.48637222765)	TRINITY_DN2990_c3_g1(4.48637222765)
GO:0033084	regulation of immature T cell proliferation in thymus	biological process	1/234	1/681	0.34361	1	TRINITY_DN2990_c3_g1(4.48637222765)	TRINITY_DN2990_c3_g1(4.48637222765)
GO:0033085	negative regulation of T cell differentiation in thymus	biological process	1/234	1/681	0.34361	1	TRINITY_DN2990_c3_g1(4.48637222765)	TRINITY_DN2990_c3_g1(4.48637222765)
GO:0033087	negative regulation of immature T cell proliferation	biological process	1/234	1/681	0.34361	1	TRINITY_DN2990_c3_g1(4.48637222765)	TRINITY_DN2990_c3_g1(4.48637222765)
GO:0033088	negative regulation of immature T cell proliferation in thymus	biological process	1/234	1/681	0.34361	1	TRINITY_DN2990_c3_g1(4.48637222765)	TRINITY_DN2990_c3_g1(4.48637222765)
GO:0033089	positive regulation of T cell differentiation in thymus	biological process	1/234	1/681	0.34361	1	TRINITY_DN2990_c3_g1(4.48637222765)	TRINITY_DN2990_c3_g1(4.48637222765)
GO:0033397	zeatin metabolic process	biological process	1/234	1/681	0.34361	1	TRINITY_DN980_c0_g1(1.9423713149)	TRINITY_DN980_c0_g1(1.9423713149)
GO:0033398	zeatin biosynthetic process	biological process	1/234	1/681	0.34361	1	TRINITY_DN980_c0_g1(1.9423713149)	TRINITY_DN980_c0_g1(1.9423713149)
GO:0033400	trans-zeatin metabolic process	biological process	1/234	1/681	0.34361	1	TRINITY_DN980_c0_g1(1.9423713149)	TRINITY_DN980_c0_g1(1.9423713149)
GO:0033466	trans-zeatin biosynthetic process	biological process	1/234	1/681	0.34361	1	TRINITY_DN980_c0_g1(1.9423713149)	TRINITY_DN980_c0_g1(1.9423713149)
GO:0033504	floor plate development	biological process	1/234	1/681	0.34361	1	TRINITY_DN1551_c0_g1(-2.62773240149)	TRINITY_DN1551_c0_g1(-2.62773240149)
GO:0033750	ribosome localization	biological process	1/234	1/681	0.34361	1	TRINITY_DN3343_c1_g7(1.11505558557)	TRINITY_DN3343_c1_g7(1.11505558557)
GO:0034058	endosomal vesicle fusion	biological process	1/234	1/681	0.34361	1	TRINITY_DN2829_c3_g4(-2.33743191627)	TRINITY_DN2829_c3_g4(-2.33743191627)
GO:0034285	response to disaccharide	biological process	1/234	1/681	0.34361	1	TRINITY_DN3172_c3_g4(-1.50849298535)	TRINITY_DN3172_c3_g4(-1.50849298535)
GO:0034314	Arp2/3 complex-mediated actin nucleation	biological process	1/234	1/681	0.34361	1	TRINITY_DN2624_c3_g2(-1.7395971044)	TRINITY_DN2624_c3_g2(-1.7395971044)
GO:0034389	lipid particle organization	biological process	1/234	1/681	0.34361	1	TRINITY_DN1383_c0_g2(-5.09453204951)	TRINITY_DN1383_c0_g2(-5.09453204951)
GO:0034394	protein localization to cell surface	biological process	1/234	1/681	0.34361	1	TRINITY_DN2990_c3_g1(4.48637222765)	TRINITY_DN2990_c3_g1(4.48637222765)
GO:0034433	steroid esterification	biological process	1/234	1/681	0.34361	1	TRINITY_DN2917_c3_g1(-1.13937325966)	TRINITY_DN2917_c3_g1(-1.13937325966)
GO:0034434	sterol esterification	biological process	1/234	1/681	0.34361	1	TRINITY_DN2917_c3_g1(-1.13937325966)	TRINITY_DN2917_c3_g1(-1.13937325966)
GO:0034720	histone H3-K4 demethylation	biological process	1/234	1/681	0.34361	1	TRINITY_DN3034_c4_g1(-2.34785465768)	TRINITY_DN3034_c4_g1(-2.34785465768)
GO:0034721	histone H3-K4 demethylation, trimethyl-H3-K4-specific	biological process	1/234	1/681	0.34361	1	TRINITY_DN3034_c4_g1(-2.34785465768)	TRINITY_DN3034_c4_g1(-2.34785465768)
GO:0034754	cellular hormone metabolic process	biological process	1/234	1/681	0.34361	1	TRINITY_DN980_c0_g1(1.9423713149)	TRINITY_DN980_c0_g1(1.9423713149)
GO:0034755	iron ion transmembrane transport	biological process	1/234	1/681	0.34361	1	TRINITY_DN3455_c5_g4(-1.38140557462)	TRINITY_DN3455_c5_g4(-1.38140557462)
GO:0035161	imaginal disc lineage restriction	biological process	1/234	1/681	0.34361	1	TRINITY_DN2990_c3_g1(4.48637222765)	TRINITY_DN2990_c3_g1(4.48637222765)
GO:0035215	genital disc development	biological process	1/234	1/681	0.34361	1	TRINITY_DN2990_c3_g1(4.48637222765)	TRINITY_DN2990_c3_g1(4.48637222765)
GO:0035217	labial disc development	biological process	1/234	1/681	0.34361	1	TRINITY_DN2990_c3_g1(4.48637222765)	TRINITY_DN2990_c3_g1(4.48637222765)
GO:0035218	leg disc development	biological process	1/234	1/681	0.34361	1	TRINITY_DN2990_c3_g1(4.48637222765)	TRINITY_DN2990_c3_g1(4.48637222765)
GO:0035221	genital disc pattern formation	biological process	1/234	1/681	0.34361	1	TRINITY_DN2990_c3_g1(4.48637222765)	TRINITY_DN2990_c3_g1(4.48637222765)
GO:0035224	genital disc anterior/posterior pattern formation	biological process	1/234	1/681	0.34361	1	TRINITY_DN2990_c3_g1(4.48637222765)	TRINITY_DN2990_c3_g1(4.48637222765)
GO:0035231	cytoneme assembly	biological process	1/234	1/681	0.34361	1	TRINITY_DN2990_c3_g1(4.48637222765)	TRINITY_DN2990_c3_g1(4.48637222765)
GO:0035232	germ cell attraction	biological process	1/234	1/681	0.34361	1	TRINITY_DN2990_c3_g1(4.48637222765)	TRINITY_DN2990_c3_g1(4.48637222765)
GO:0035249	synaptic transmission, glutamatergic	biological process	1/234	1/681	0.34361	1	TRINITY_DN2559_c3_g1(-1.41187808043)	TRINITY_DN2559_c3_g1(-1.41187808043)
GO:0035265	organ growth	biological process	1/234	1/681	0.34361	1	TRINITY_DN2990_c3_g1(4.48637222765)	TRINITY_DN2990_c3_g1(4.48637222765)
GO:0035277	spiracle morphogenesis, open tracheal system	biological process	1/234	1/681	0.34361	1	TRINITY_DN2990_c3_g1(4.48637222765)	TRINITY_DN2990_c3_g1(4.48637222765)
GO:0035287	head segmentation	biological process	1/234	1/681	0.34361	1	TRINITY_DN2990_c3_g1(4.48637222765)	TRINITY_DN2990_c3_g1(4.48637222765)
GO:0035288	anterior head segmentation	biological process	1/234	1/681	0.34361	1	TRINITY_DN2990_c3_g1(4.48637222765)	TRINITY_DN2990_c3_g1(4.48637222765)
GO:0035289	posterior head segmentation	biological process	1/234	1/681	0.34361	1	TRINITY_DN2990_c3_g1(4.48637222765)	TRINITY_DN2990_c3_g1(4.48637222765)
GO:0035290	trunk segmentation	biological process	1/234	1/681	0.34361	1	TRINITY_DN2990_c3_g1(4.48637222765)	TRINITY_DN2990_c3_g1(4.48637222765)
GO:0035510	DNA dealkylation	biological process	1/234	1/681	0.34361	1	TRINITY_DN3466_c5_g2(-1.56168631845)	TRINITY_DN3466_c5_g2(-1.56168631845)
GO:0035513	oxidative RNA demethylation	biological process	1/234	1/681	0.34361	1	TRINITY_DN3466_c5_g2(-1.56168631845)	TRINITY_DN3466_c5_g2(-1.56168631845)
GO:0035553	oxidative single-stranded RNA demethylation	biological process	1/234	1/681	0.34361	1	TRINITY_DN3466_c5_g2(-1.56168631845)	TRINITY_DN3466_c5_g2(-1.56168631845)
GO:0035581	sequestering of extracellular ligand from receptor	biological process	1/234	1/681	0.34361	1	TRINITY_DN2863_c0_g2(-1.17670982061)	TRINITY_DN2863_c0_g2(-1.17670982061)
GO:0035694	mitochondrial protein catabolic process	biological process	1/234	1/681	0.34361	1	TRINITY_DN3337_c0_g1(-1.84211313121)	TRINITY_DN3337_c0_g1(-1.84211313121)
GO:0035803	egg coat formation	biological process	1/234	1/681	0.34361	1	TRINITY_DN2990_c3_g1(4.48637222765)	TRINITY_DN2990_c3_g1(4.48637222765)
GO:0035822	gene conversion	biological process	1/234	1/681	0.34361	1	TRINITY_DN2986_c3_g1(-1.95868262638)	TRINITY_DN2986_c3_g1(-1.95868262638)
GO:0035988	chondrocyte proliferation	biological process	1/234	1/681	0.34361	1	TRINITY_DN2990_c3_g1(4.48637222765)	TRINITY_DN2990_c3_g1(4.48637222765)
GO:0036046	protein demalonylation	biological process	1/234	1/681	0.34361	1	TRINITY_DN1267_c0_g1(-3.74317437745)	TRINITY_DN1267_c0_g1(-3.74317437745)
GO:0036047	peptidyl-lysine demalonylation	biological process	1/234	1/681	0.34361	1	TRINITY_DN1267_c0_g1(-3.74317437745)	TRINITY_DN1267_c0_g1(-3.74317437745)
GO:0036048	protein desuccinylation	biological process	1/234	1/681	0.34361	1	TRINITY_DN1267_c0_g1(-3.74317437745)	TRINITY_DN1267_c0_g1(-3.74317437745)
GO:0036049	peptidyl-lysine desuccinylation	biological process	1/234	1/681	0.34361	1	TRINITY_DN1267_c0_g1(-3.74317437745)	TRINITY_DN1267_c0_g1(-3.74317437745)
GO:0036149	phosphatidylinositol acyl-chain remodeling	biological process	1/234	1/681	0.34361	1	TRINITY_DN3039_c1_g2(-1.41066512147)	TRINITY_DN3039_c1_g2(-1.41066512147)
GO:0036151	phosphatidylcholine acyl-chain remodeling	biological process	1/234	1/681	0.34361	1	TRINITY_DN3039_c1_g2(-1.41066512147)	TRINITY_DN3039_c1_g2(-1.41066512147)
GO:0036152	phosphatidylethanolamine acyl-chain remodeling	biological process	1/234	1/681	0.34361	1	TRINITY_DN3039_c1_g2(-1.41066512147)	TRINITY_DN3039_c1_g2(-1.41066512147)
GO:0036388	pre-replicative complex assembly	biological process	1/234	1/681	0.34361	1	TRINITY_DN3172_c3_g4(-1.50849298535)	TRINITY_DN3172_c3_g4(-1.50849298535)
GO:0040036	regulation of fibroblast growth factor receptor signaling pathway	biological process	1/234	1/681	0.34361	1	TRINITY_DN2990_c3_g1(4.48637222765)	TRINITY_DN2990_c3_g1(4.48637222765)
GO:0042078	germ-line stem cell division	biological process	1/234	1/681	0.34361	1	TRINITY_DN2990_c3_g1(4.48637222765)	TRINITY_DN2990_c3_g1(4.48637222765)
GO:0042130	negative regulation of T cell proliferation	biological process	1/234	1/681	0.34361	1	TRINITY_DN2990_c3_g1(4.48637222765)	TRINITY_DN2990_c3_g1(4.48637222765)
GO:0042157	lipoprotein metabolic process	biological process	1/234	1/681	0.34361	1	TRINITY_DN2767_c3_g3(-1.67248354228)	TRINITY_DN2767_c3_g3(-1.67248354228)
GO:0042158	lipoprotein biosynthetic process	biological process	1/234	1/681	0.34361	1	TRINITY_DN2767_c3_g3(-1.67248354228)	TRINITY_DN2767_c3_g3(-1.67248354228)
GO:0042303	molting cycle	biological process	1/234	1/681	0.34361	1	TRINITY_DN1445_c0_g1(-3.12136795106)	TRINITY_DN1445_c0_g1(-3.12136795106)
GO:0042494	detection of bacterial lipoprotein	biological process	1/234	1/681	0.34361	1	TRINITY_DN1453_c0_g1(-2.82693098456)	TRINITY_DN1453_c0_g1(-2.82693098456)
GO:0042631	cellular response to water deprivation	biological process	1/234	1/681	0.34361	1	TRINITY_DN3502_c0_g1(-1.23001299537)	TRINITY_DN3502_c0_g1(-1.23001299537)
GO:0042706	eye photoreceptor cell fate commitment	biological process	1/234	1/681	0.34361	1	TRINITY_DN2990_c3_g1(4.48637222765)	TRINITY_DN2990_c3_g1(4.48637222765)
GO:0042796	snRNA transcription by RNA polymerase III	biological process	1/234	1/681	0.34361	1	TRINITY_DN2818_c0_g1(-1.28984232755)	TRINITY_DN2818_c0_g1(-1.28984232755)
GO:0043010	camera-type eye development	biological process	1/234	1/681	0.34361	1	TRINITY_DN2990_c3_g1(4.48637222765)	TRINITY_DN2990_c3_g1(4.48637222765)
GO:0043111	replication fork arrest	biological process	1/234	1/681	0.34361	1	TRINITY_DN2834_c2_g1(-1.88177373969)	TRINITY_DN2834_c2_g1(-1.88177373969)
GO:0043112	receptor metabolic process	biological process	1/234	1/681	0.34361	1	TRINITY_DN2559_c3_g1(-1.41187808043)	TRINITY_DN2559_c3_g1(-1.41187808043)
GO:0043248	proteasome assembly	biological process	1/234	1/681	0.34361	1	TRINITY_DN3688_c1_g7(-2.38640377363)	TRINITY_DN3688_c1_g7(-2.38640377363)
GO:0043327	chemotaxis to cAMP	biological process	1/234	1/681	0.34361	1	TRINITY_DN3032_c1_g3(-1.81290474391)	TRINITY_DN3032_c1_g3(-1.81290474391)
GO:0043379	memory T cell differentiation	biological process	1/234	1/681	0.34361	1	TRINITY_DN2863_c0_g2(-1.17670982061)	TRINITY_DN2863_c0_g2(-1.17670982061)
GO:0043380	regulation of memory T cell differentiation	biological process	1/234	1/681	0.34361	1	TRINITY_DN2863_c0_g2(-1.17670982061)	TRINITY_DN2863_c0_g2(-1.17670982061)
GO:0043382	positive regulation of memory T cell differentiation	biological process	1/234	1/681	0.34361	1	TRINITY_DN2863_c0_g2(-1.17670982061)	TRINITY_DN2863_c0_g2(-1.17670982061)
GO:0043385	mycotoxin metabolic process	biological process	1/234	1/681	0.34361	1	TRINITY_DN6992_c0_g1(-13.2230001252)	TRINITY_DN6992_c0_g1(-13.2230001252)
GO:0043386	mycotoxin biosynthetic process	biological process	1/234	1/681	0.34361	1	TRINITY_DN6992_c0_g1(-13.2230001252)	TRINITY_DN6992_c0_g1(-13.2230001252)
GO:0043523	regulation of neuron apoptotic process	biological process	1/234	1/681	0.34361	1	TRINITY_DN497_c0_g1(3.34017844478)	TRINITY_DN497_c0_g1(3.34017844478)
GO:0043570	maintenance of DNA repeat elements	biological process	1/234	1/681	0.34361	1	TRINITY_DN2834_c2_g1(-1.88177373969)	TRINITY_DN2834_c2_g1(-1.88177373969)
GO:0043572	plastid fission	biological process	1/234	1/681	0.34361	1	TRINITY_DN3081_c0_g1(1.24454299096)	TRINITY_DN3081_c0_g1(1.24454299096)
GO:0043704	photoreceptor cell fate specification	biological process	1/234	1/681	0.34361	1	TRINITY_DN2990_c3_g1(4.48637222765)	TRINITY_DN2990_c3_g1(4.48637222765)
GO:0044070	regulation of anion transport	biological process	1/234	1/681	0.34361	1	TRINITY_DN3324_c1_g1(-1.19910771168)	TRINITY_DN3324_c1_g1(-1.19910771168)
GO:0044346	fibroblast apoptotic process	biological process	1/234	1/681	0.34361	1	TRINITY_DN3590_c3_g1(-1.35288789047)	TRINITY_DN3590_c3_g1(-1.35288789047)
GO:0044380	protein localization to cytoskeleton	biological process	1/234	1/681	0.34361	1	TRINITY_DN1551_c0_g1(-2.62773240149)	TRINITY_DN1551_c0_g1(-2.62773240149)
GO:0045008	depyrimidination	biological process	1/234	1/681	0.34361	1	TRINITY_DN3285_c2_g1(-1.58640393684)	TRINITY_DN3285_c2_g1(-1.58640393684)
GO:0045010	actin nucleation	biological process	1/234	1/681	0.34361	1	TRINITY_DN2624_c3_g2(-1.7395971044)	TRINITY_DN2624_c3_g2(-1.7395971044)
GO:0045026	plasma membrane fusion	biological process	1/234	1/681	0.34361	1	TRINITY_DN2521_c4_g1(-2.61442070653)	TRINITY_DN2521_c4_g1(-2.61442070653)
GO:0045038	protein import into chloroplast thylakoid membrane	biological process	1/234	1/681	0.34361	1	TRINITY_DN3078_c1_g7(-1.41151727277)	TRINITY_DN3078_c1_g7(-1.41151727277)
GO:0045168	cell-cell signaling involved in cell fate commitment	biological process	1/234	1/681	0.34361	1	TRINITY_DN2990_c3_g1(4.48637222765)	TRINITY_DN2990_c3_g1(4.48637222765)
GO:0045453	bone resorption	biological process	1/234	1/681	0.34361	1	TRINITY_DN2990_c3_g1(4.48637222765)	TRINITY_DN2990_c3_g1(4.48637222765)
GO:0045460	sterigmatocystin metabolic process	biological process	1/234	1/681	0.34361	1	TRINITY_DN6992_c0_g1(-13.2230001252)	TRINITY_DN6992_c0_g1(-13.2230001252)
GO:0045461	sterigmatocystin biosynthetic process	biological process	1/234	1/681	0.34361	1	TRINITY_DN6992_c0_g1(-13.2230001252)	TRINITY_DN6992_c0_g1(-13.2230001252)
GO:0045464	R8 cell fate specification	biological process	1/234	1/681	0.34361	1	TRINITY_DN2990_c3_g1(4.48637222765)	TRINITY_DN2990_c3_g1(4.48637222765)
GO:0045465	R8 cell differentiation	biological process	1/234	1/681	0.34361	1	TRINITY_DN2990_c3_g1(4.48637222765)	TRINITY_DN2990_c3_g1(4.48637222765)
GO:0045492	xylan biosynthetic process	biological process	1/234	1/681	0.34361	1	TRINITY_DN3722_c1_g7(-2.33487818804)	TRINITY_DN3722_c1_g7(-2.33487818804)
GO:0045581	negative regulation of T cell differentiation	biological process	1/234	1/681	0.34361	1	TRINITY_DN2990_c3_g1(4.48637222765)	TRINITY_DN2990_c3_g1(4.48637222765)
GO:0045591	positive regulation of regulatory T cell differentiation	biological process	1/234	1/681	0.34361	1	TRINITY_DN2863_c0_g2(-1.17670982061)	TRINITY_DN2863_c0_g2(-1.17670982061)
GO:0045620	negative regulation of lymphocyte differentiation	biological process	1/234	1/681	0.34361	1	TRINITY_DN2990_c3_g1(4.48637222765)	TRINITY_DN2990_c3_g1(4.48637222765)
GO:0045737	positive regulation of cyclin-dependent protein serine/threonine kinase activity	biological process	1/234	1/681	0.34361	1	TRINITY_DN1551_c0_g1(-2.62773240149)	TRINITY_DN1551_c0_g1(-2.62773240149)
GO:0045740	positive regulation of DNA replication	biological process	1/234	1/681	0.34361	1	TRINITY_DN3034_c3_g2(-2.78869539746)	TRINITY_DN3034_c3_g2(-2.78869539746)
GO:0045743	positive regulation of fibroblast growth factor receptor signaling pathway	biological process	1/234	1/681	0.34361	1	TRINITY_DN2990_c3_g1(4.48637222765)	TRINITY_DN2990_c3_g1(4.48637222765)
GO:0045807	positive regulation of endocytosis	biological process	1/234	1/681	0.34361	1	TRINITY_DN2559_c3_g1(-1.41187808043)	TRINITY_DN2559_c3_g1(-1.41187808043)
GO:0045880	positive regulation of smoothened signaling pathway	biological process	1/234	1/681	0.34361	1	TRINITY_DN2990_c3_g1(4.48637222765)	TRINITY_DN2990_c3_g1(4.48637222765)
GO:0045911	positive regulation of DNA recombination	biological process	1/234	1/681	0.34361	1	TRINITY_DN3311_c1_g2(-1.13281740221)	TRINITY_DN3311_c1_g2(-1.13281740221)
GO:0045916	negative regulation of complement activation	biological process	1/234	1/681	0.34361	1	TRINITY_DN2863_c0_g2(-1.17670982061)	TRINITY_DN2863_c0_g2(-1.17670982061)
GO:0045945	positive regulation of transcription by RNA polymerase III	biological process	1/234	1/681	0.34361	1	TRINITY_DN2818_c0_g1(-1.28984232755)	TRINITY_DN2818_c0_g1(-1.28984232755)
GO:0046058	cAMP metabolic process	biological process	1/234	1/681	0.34361	1	TRINITY_DN3032_c1_g3(-1.81290474391)	TRINITY_DN3032_c1_g3(-1.81290474391)
GO:0046552	photoreceptor cell fate commitment	biological process	1/234	1/681	0.34361	1	TRINITY_DN2990_c3_g1(4.48637222765)	TRINITY_DN2990_c3_g1(4.48637222765)
GO:0046618	drug export	biological process	1/234	1/681	0.34361	1	TRINITY_DN3343_c1_g7(1.11505558557)	TRINITY_DN3343_c1_g7(1.11505558557)
GO:0046634	regulation of alpha-beta T cell activation	biological process	1/234	1/681	0.34361	1	TRINITY_DN2990_c3_g1(4.48637222765)	TRINITY_DN2990_c3_g1(4.48637222765)
GO:0046635	positive regulation of alpha-beta T cell activation	biological process	1/234	1/681	0.34361	1	TRINITY_DN2990_c3_g1(4.48637222765)	TRINITY_DN2990_c3_g1(4.48637222765)
GO:0046636	negative regulation of alpha-beta T cell activation	biological process	1/234	1/681	0.34361	1	TRINITY_DN2990_c3_g1(4.48637222765)	TRINITY_DN2990_c3_g1(4.48637222765)
GO:0046637	regulation of alpha-beta T cell differentiation	biological process	1/234	1/681	0.34361	1	TRINITY_DN2990_c3_g1(4.48637222765)	TRINITY_DN2990_c3_g1(4.48637222765)
GO:0046638	positive regulation of alpha-beta T cell differentiation	biological process	1/234	1/681	0.34361	1	TRINITY_DN2990_c3_g1(4.48637222765)	TRINITY_DN2990_c3_g1(4.48637222765)
GO:0046639	negative regulation of alpha-beta T cell differentiation	biological process	1/234	1/681	0.34361	1	TRINITY_DN2990_c3_g1(4.48637222765)	TRINITY_DN2990_c3_g1(4.48637222765)
GO:0046719	regulation by virus of viral protein levels in host cell	biological process	1/234	1/681	0.34361	1	TRINITY_DN3020_c4_g1(-1.1057580358)	TRINITY_DN3020_c4_g1(-1.1057580358)
GO:0046849	bone remodeling	biological process	1/234	1/681	0.34361	1	TRINITY_DN2990_c3_g1(4.48637222765)	TRINITY_DN2990_c3_g1(4.48637222765)
GO:0047484	regulation of response to osmotic stress	biological process	1/234	1/681	0.34361	1	TRINITY_DN3324_c1_g1(-1.19910771168)	TRINITY_DN3324_c1_g1(-1.19910771168)
GO:0048048	embryonic eye morphogenesis	biological process	1/234	1/681	0.34361	1	TRINITY_DN2990_c3_g1(4.48637222765)	TRINITY_DN2990_c3_g1(4.48637222765)
GO:0048070	regulation of developmental pigmentation	biological process	1/234	1/681	0.34361	1	TRINITY_DN2990_c3_g1(4.48637222765)	TRINITY_DN2990_c3_g1(4.48637222765)
GO:0048073	regulation of eye pigmentation	biological process	1/234	1/681	0.34361	1	TRINITY_DN2990_c3_g1(4.48637222765)	TRINITY_DN2990_c3_g1(4.48637222765)
GO:0048074	negative regulation of eye pigmentation	biological process	1/234	1/681	0.34361	1	TRINITY_DN2990_c3_g1(4.48637222765)	TRINITY_DN2990_c3_g1(4.48637222765)
GO:0048086	negative regulation of developmental pigmentation	biological process	1/234	1/681	0.34361	1	TRINITY_DN2990_c3_g1(4.48637222765)	TRINITY_DN2990_c3_g1(4.48637222765)
GO:0048099	anterior/posterior lineage restriction, imaginal disc	biological process	1/234	1/681	0.34361	1	TRINITY_DN2990_c3_g1(4.48637222765)	TRINITY_DN2990_c3_g1(4.48637222765)
GO:0048100	wing disc anterior/posterior pattern formation	biological process	1/234	1/681	0.34361	1	TRINITY_DN2990_c3_g1(4.48637222765)	TRINITY_DN2990_c3_g1(4.48637222765)
GO:0048259	regulation of receptor-mediated endocytosis	biological process	1/234	1/681	0.34361	1	TRINITY_DN2559_c3_g1(-1.41187808043)	TRINITY_DN2559_c3_g1(-1.41187808043)
GO:0048260	positive regulation of receptor-mediated endocytosis	biological process	1/234	1/681	0.34361	1	TRINITY_DN2559_c3_g1(-1.41187808043)	TRINITY_DN2559_c3_g1(-1.41187808043)
GO:0048279	vesicle fusion with endoplasmic reticulum	biological process	1/234	1/681	0.34361	1	TRINITY_DN3118_c6_g1(-2.15189148233)	TRINITY_DN3118_c6_g1(-2.15189148233)
GO:0048478	replication fork protection	biological process	1/234	1/681	0.34361	1	TRINITY_DN1577_c0_g1(-1.27109622825)	TRINITY_DN1577_c0_g1(-1.27109622825)
GO:0048546	digestive tract morphogenesis	biological process	1/234	1/681	0.34361	1	TRINITY_DN2990_c3_g1(4.48637222765)	TRINITY_DN2990_c3_g1(4.48637222765)
GO:0048557	embryonic digestive tract morphogenesis	biological process	1/234	1/681	0.34361	1	TRINITY_DN2990_c3_g1(4.48637222765)	TRINITY_DN2990_c3_g1(4.48637222765)
GO:0048566	embryonic digestive tract development	biological process	1/234	1/681	0.34361	1	TRINITY_DN2990_c3_g1(4.48637222765)	TRINITY_DN2990_c3_g1(4.48637222765)
GO:0048593	camera-type eye morphogenesis	biological process	1/234	1/681	0.34361	1	TRINITY_DN2990_c3_g1(4.48637222765)	TRINITY_DN2990_c3_g1(4.48637222765)
GO:0048596	embryonic camera-type eye morphogenesis	biological process	1/234	1/681	0.34361	1	TRINITY_DN2990_c3_g1(4.48637222765)	TRINITY_DN2990_c3_g1(4.48637222765)
GO:0048663	neuron fate commitment	biological process	1/234	1/681	0.34361	1	TRINITY_DN2990_c3_g1(4.48637222765)	TRINITY_DN2990_c3_g1(4.48637222765)
GO:0048665	neuron fate specification	biological process	1/234	1/681	0.34361	1	TRINITY_DN2990_c3_g1(4.48637222765)	TRINITY_DN2990_c3_g1(4.48637222765)
GO:0048709	oligodendrocyte differentiation	biological process	1/234	1/681	0.34361	1	TRINITY_DN2990_c3_g1(4.48637222765)	TRINITY_DN2990_c3_g1(4.48637222765)
GO:0048745	smooth muscle tissue development	biological process	1/234	1/681	0.34361	1	TRINITY_DN2990_c3_g1(4.48637222765)	TRINITY_DN2990_c3_g1(4.48637222765)
GO:0048771	tissue remodeling	biological process	1/234	1/681	0.34361	1	TRINITY_DN2990_c3_g1(4.48637222765)	TRINITY_DN2990_c3_g1(4.48637222765)
GO:0048837	sorocarp sorus development	biological process	1/234	1/681	0.34361	1	TRINITY_DN3032_c1_g3(-1.81290474391)	TRINITY_DN3032_c1_g3(-1.81290474391)
GO:0050672	negative regulation of lymphocyte proliferation	biological process	1/234	1/681	0.34361	1	TRINITY_DN2990_c3_g1(4.48637222765)	TRINITY_DN2990_c3_g1(4.48637222765)
GO:0050679	positive regulation of epithelial cell proliferation	biological process	1/234	1/681	0.34361	1	TRINITY_DN2990_c3_g1(4.48637222765)	TRINITY_DN2990_c3_g1(4.48637222765)
GO:0050709	negative regulation of protein secretion	biological process	1/234	1/681	0.34361	1	TRINITY_DN1453_c0_g1(-2.82693098456)	TRINITY_DN1453_c0_g1(-2.82693098456)
GO:0050710	negative regulation of cytokine secretion	biological process	1/234	1/681	0.34361	1	TRINITY_DN1453_c0_g1(-2.82693098456)	TRINITY_DN1453_c0_g1(-2.82693098456)
GO:0050777	negative regulation of immune response	biological process	1/234	1/681	0.34361	1	TRINITY_DN2863_c0_g2(-1.17670982061)	TRINITY_DN2863_c0_g2(-1.17670982061)
GO:0050792	regulation of viral process	biological process	1/234	1/681	0.34361	1	TRINITY_DN3020_c4_g1(-1.1057580358)	TRINITY_DN3020_c4_g1(-1.1057580358)
GO:0050805	negative regulation of synaptic transmission	biological process	1/234	1/681	0.34361	1	TRINITY_DN2559_c3_g1(-1.41187808043)	TRINITY_DN2559_c3_g1(-1.41187808043)
GO:0050866	negative regulation of cell activation	biological process	1/234	1/681	0.34361	1	TRINITY_DN2990_c3_g1(4.48637222765)	TRINITY_DN2990_c3_g1(4.48637222765)
GO:0050868	negative regulation of T cell activation	biological process	1/234	1/681	0.34361	1	TRINITY_DN2990_c3_g1(4.48637222765)	TRINITY_DN2990_c3_g1(4.48637222765)
GO:0050906	detection of stimulus involved in sensory perception	biological process	1/234	1/681	0.34361	1	TRINITY_DN3593_c1_g1(-1.02641959886)	TRINITY_DN3593_c1_g1(-1.02641959886)
GO:0050907	detection of chemical stimulus involved in sensory perception	biological process	1/234	1/681	0.34361	1	TRINITY_DN3593_c1_g1(-1.02641959886)	TRINITY_DN3593_c1_g1(-1.02641959886)
GO:0050927	positive regulation of positive chemotaxis	biological process	1/234	1/681	0.34361	1	TRINITY_DN3032_c1_g3(-1.81290474391)	TRINITY_DN3032_c1_g3(-1.81290474391)
GO:0050994	regulation of lipid catabolic process	biological process	1/234	1/681	0.34361	1	TRINITY_DN2670_c2_g6(-1.02619526061)	TRINITY_DN2670_c2_g6(-1.02619526061)
GO:0051048	negative regulation of secretion	biological process	1/234	1/681	0.34361	1	TRINITY_DN1453_c0_g1(-2.82693098456)	TRINITY_DN1453_c0_g1(-2.82693098456)
GO:0051091	positive regulation of DNA binding transcription factor activity	biological process	1/234	1/681	0.34361	1	TRINITY_DN2990_c3_g1(4.48637222765)	TRINITY_DN2990_c3_g1(4.48637222765)
GO:0051208	sequestering of calcium ion	biological process	1/234	1/681	0.34361	1	TRINITY_DN3032_c1_g3(-1.81290474391)	TRINITY_DN3032_c1_g3(-1.81290474391)
GO:0051209	release of sequestered calcium ion into cytosol	biological process	1/234	1/681	0.34361	1	TRINITY_DN3032_c1_g3(-1.81290474391)	TRINITY_DN3032_c1_g3(-1.81290474391)
GO:0051231	spindle elongation	biological process	1/234	1/681	0.34361	1	TRINITY_DN3368_c3_g3(-1.35865189413)	TRINITY_DN3368_c3_g3(-1.35865189413)
GO:0051238	sequestering of metal ion	biological process	1/234	1/681	0.34361	1	TRINITY_DN3455_c5_g4(-1.38140557462)	TRINITY_DN3455_c5_g4(-1.38140557462)
GO:0051250	negative regulation of lymphocyte activation	biological process	1/234	1/681	0.34361	1	TRINITY_DN2990_c3_g1(4.48637222765)	TRINITY_DN2990_c3_g1(4.48637222765)
GO:0051279	regulation of release of sequestered calcium ion into cytosol	biological process	1/234	1/681	0.34361	1	TRINITY_DN3032_c1_g3(-1.81290474391)	TRINITY_DN3032_c1_g3(-1.81290474391)
GO:0051281	positive regulation of release of sequestered calcium ion into cytosol	biological process	1/234	1/681	0.34361	1	TRINITY_DN3032_c1_g3(-1.81290474391)	TRINITY_DN3032_c1_g3(-1.81290474391)
GO:0051282	regulation of sequestering of calcium ion	biological process	1/234	1/681	0.34361	1	TRINITY_DN3032_c1_g3(-1.81290474391)	TRINITY_DN3032_c1_g3(-1.81290474391)
GO:0051283	negative regulation of sequestering of calcium ion	biological process	1/234	1/681	0.34361	1	TRINITY_DN3032_c1_g3(-1.81290474391)	TRINITY_DN3032_c1_g3(-1.81290474391)
GO:0051291	protein heterooligomerization	biological process	1/234	1/681	0.34361	1	TRINITY_DN3078_c1_g7(-1.41151727277)	TRINITY_DN3078_c1_g7(-1.41151727277)
GO:0051480	regulation of cytosolic calcium ion concentration	biological process	1/234	1/681	0.34361	1	TRINITY_DN3032_c1_g3(-1.81290474391)	TRINITY_DN3032_c1_g3(-1.81290474391)
GO:0051510	regulation of unidimensional cell growth	biological process	1/234	1/681	0.34361	1	TRINITY_DN3324_c1_g1(-1.19910771168)	TRINITY_DN3324_c1_g1(-1.19910771168)
GO:0051775	response to redox state	biological process	1/234	1/681	0.34361	1	TRINITY_DN1926_c0_g1(-2.31459139144)	TRINITY_DN1926_c0_g1(-2.31459139144)
GO:0051776	detection of redox state	biological process	1/234	1/681	0.34361	1	TRINITY_DN1926_c0_g1(-2.31459139144)	TRINITY_DN1926_c0_g1(-2.31459139144)
GO:0051924	regulation of calcium ion transport	biological process	1/234	1/681	0.34361	1	TRINITY_DN3032_c1_g3(-1.81290474391)	TRINITY_DN3032_c1_g3(-1.81290474391)
GO:0051928	positive regulation of calcium ion transport	biological process	1/234	1/681	0.34361	1	TRINITY_DN3032_c1_g3(-1.81290474391)	TRINITY_DN3032_c1_g3(-1.81290474391)
GO:0051966	regulation of synaptic transmission, glutamatergic	biological process	1/234	1/681	0.34361	1	TRINITY_DN2559_c3_g1(-1.41187808043)	TRINITY_DN2559_c3_g1(-1.41187808043)
GO:0051967	negative regulation of synaptic transmission, glutamatergic	biological process	1/234	1/681	0.34361	1	TRINITY_DN2559_c3_g1(-1.41187808043)	TRINITY_DN2559_c3_g1(-1.41187808043)
GO:0051973	positive regulation of telomerase activity	biological process	1/234	1/681	0.34361	1	TRINITY_DN1268_c0_g1(-2.06811775799)	TRINITY_DN1268_c0_g1(-2.06811775799)
GO:0052173	response to defenses of other organism involved in symbiotic interaction	biological process	1/234	1/681	0.34361	1	TRINITY_DN2782_c0_g6(1.65399754879)	TRINITY_DN2782_c0_g6(1.65399754879)
GO:0052200	response to host defenses	biological process	1/234	1/681	0.34361	1	TRINITY_DN2782_c0_g6(1.65399754879)	TRINITY_DN2782_c0_g6(1.65399754879)
GO:0052564	response to immune response of other organism involved in symbiotic interaction	biological process	1/234	1/681	0.34361	1	TRINITY_DN2782_c0_g6(1.65399754879)	TRINITY_DN2782_c0_g6(1.65399754879)
GO:0052572	response to host immune response	biological process	1/234	1/681	0.34361	1	TRINITY_DN2782_c0_g6(1.65399754879)	TRINITY_DN2782_c0_g6(1.65399754879)
GO:0055001	muscle cell development	biological process	1/234	1/681	0.34361	1	TRINITY_DN2990_c3_g1(4.48637222765)	TRINITY_DN2990_c3_g1(4.48637222765)
GO:0055002	striated muscle cell development	biological process	1/234	1/681	0.34361	1	TRINITY_DN2990_c3_g1(4.48637222765)	TRINITY_DN2990_c3_g1(4.48637222765)
GO:0055034	Bolwig's organ development	biological process	1/234	1/681	0.34361	1	TRINITY_DN2990_c3_g1(4.48637222765)	TRINITY_DN2990_c3_g1(4.48637222765)
GO:0055070	copper ion homeostasis	biological process	1/234	1/681	0.34361	1	TRINITY_DN3141_c1_g4(-1.27569617362)	TRINITY_DN3141_c1_g4(-1.27569617362)
GO:0055071	manganese ion homeostasis	biological process	1/234	1/681	0.34361	1	TRINITY_DN3455_c5_g4(-1.38140557462)	TRINITY_DN3455_c5_g4(-1.38140557462)
GO:0060041	retina development in camera-type eye	biological process	1/234	1/681	0.34361	1	TRINITY_DN2990_c3_g1(4.48637222765)	TRINITY_DN2990_c3_g1(4.48637222765)
GO:0060042	retina morphogenesis in camera-type eye	biological process	1/234	1/681	0.34361	1	TRINITY_DN2990_c3_g1(4.48637222765)	TRINITY_DN2990_c3_g1(4.48637222765)
GO:0060219	camera-type eye photoreceptor cell differentiation	biological process	1/234	1/681	0.34361	1	TRINITY_DN2990_c3_g1(4.48637222765)	TRINITY_DN2990_c3_g1(4.48637222765)
GO:0060220	camera-type eye photoreceptor cell fate commitment	biological process	1/234	1/681	0.34361	1	TRINITY_DN2990_c3_g1(4.48637222765)	TRINITY_DN2990_c3_g1(4.48637222765)
GO:0060287	epithelial cilium movement involved in determination of left/right asymmetry	biological process	1/234	1/681	0.34361	1	TRINITY_DN2656_c0_g2(-4.58846026162)	TRINITY_DN2656_c0_g2(-4.58846026162)
GO:0060323	head morphogenesis	biological process	1/234	1/681	0.34361	1	TRINITY_DN2990_c3_g1(4.48637222765)	TRINITY_DN2990_c3_g1(4.48637222765)
GO:0060326	cell chemotaxis	biological process	1/234	1/681	0.34361	1	TRINITY_DN2990_c3_g1(4.48637222765)	TRINITY_DN2990_c3_g1(4.48637222765)
GO:0060350	endochondral bone morphogenesis	biological process	1/234	1/681	0.34361	1	TRINITY_DN2990_c3_g1(4.48637222765)	TRINITY_DN2990_c3_g1(4.48637222765)
GO:0060351	cartilage development involved in endochondral bone morphogenesis	biological process	1/234	1/681	0.34361	1	TRINITY_DN2990_c3_g1(4.48637222765)	TRINITY_DN2990_c3_g1(4.48637222765)
GO:0060402	calcium ion transport into cytosol	biological process	1/234	1/681	0.34361	1	TRINITY_DN3032_c1_g3(-1.81290474391)	TRINITY_DN3032_c1_g3(-1.81290474391)
GO:0060542	regulation of strand invasion	biological process	1/234	1/681	0.34361	1	TRINITY_DN3311_c1_g2(-1.13281740221)	TRINITY_DN3311_c1_g2(-1.13281740221)
GO:0060606	tube closure	biological process	1/234	1/681	0.34361	1	TRINITY_DN1551_c0_g1(-2.62773240149)	TRINITY_DN1551_c0_g1(-2.62773240149)
GO:0060914	heart formation	biological process	1/234	1/681	0.34361	1	TRINITY_DN2990_c3_g1(4.48637222765)	TRINITY_DN2990_c3_g1(4.48637222765)
GO:0061118	regulation of positive chemotaxis to cAMP	biological process	1/234	1/681	0.34361	1	TRINITY_DN3032_c1_g3(-1.81290474391)	TRINITY_DN3032_c1_g3(-1.81290474391)
GO:0061119	regulation of positive chemotaxis to cAMP by chlorinated alkylphenone	biological process	1/234	1/681	0.34361	1	TRINITY_DN3032_c1_g3(-1.81290474391)	TRINITY_DN3032_c1_g3(-1.81290474391)
GO:0061121	regulation of positive chemotaxis to cAMP by DIF-2	biological process	1/234	1/681	0.34361	1	TRINITY_DN3032_c1_g3(-1.81290474391)	TRINITY_DN3032_c1_g3(-1.81290474391)
GO:0061122	positive regulation of positive chemotaxis to cAMP	biological process	1/234	1/681	0.34361	1	TRINITY_DN3032_c1_g3(-1.81290474391)	TRINITY_DN3032_c1_g3(-1.81290474391)
GO:0061124	positive regulation of positive chemotaxis to cAMP by chlorinated alkylphenone	biological process	1/234	1/681	0.34361	1	TRINITY_DN3032_c1_g3(-1.81290474391)	TRINITY_DN3032_c1_g3(-1.81290474391)
GO:0061128	positive regulation of chemotaxis to cAMP by DIF-2	biological process	1/234	1/681	0.34361	1	TRINITY_DN3032_c1_g3(-1.81290474391)	TRINITY_DN3032_c1_g3(-1.81290474391)
GO:0061525	hindgut development	biological process	1/234	1/681	0.34361	1	TRINITY_DN2990_c3_g1(4.48637222765)	TRINITY_DN2990_c3_g1(4.48637222765)
GO:0061698	protein deglutarylation	biological process	1/234	1/681	0.34361	1	TRINITY_DN1267_c0_g1(-3.74317437745)	TRINITY_DN1267_c0_g1(-3.74317437745)
GO:0061699	peptidyl-lysine deglutarylation	biological process	1/234	1/681	0.34361	1	TRINITY_DN1267_c0_g1(-3.74317437745)	TRINITY_DN1267_c0_g1(-3.74317437745)
GO:0061820	telomeric D-loop disassembly	biological process	1/234	1/681	0.34361	1	TRINITY_DN3311_c1_g2(-1.13281740221)	TRINITY_DN3311_c1_g2(-1.13281740221)
GO:0061971	replacement bone morphogenesis	biological process	1/234	1/681	0.34361	1	TRINITY_DN2990_c3_g1(4.48637222765)	TRINITY_DN2990_c3_g1(4.48637222765)
GO:0070058	tRNA gene clustering	biological process	1/234	1/681	0.34361	1	TRINITY_DN2674_c3_g1(-1.20247600187)	TRINITY_DN2674_c3_g1(-1.20247600187)
GO:0070129	regulation of mitochondrial translation	biological process	1/234	1/681	0.34361	1	TRINITY_DN3002_c7_g7(1.15397086811)	TRINITY_DN3002_c7_g7(1.15397086811)
GO:0070207	protein homotrimerization	biological process	1/234	1/681	0.34361	1	TRINITY_DN2521_c4_g1(-2.61442070653)	TRINITY_DN2521_c4_g1(-2.61442070653)
GO:0070208	protein heterotrimerization	biological process	1/234	1/681	0.34361	1	TRINITY_DN3078_c1_g7(-1.41151727277)	TRINITY_DN3078_c1_g7(-1.41151727277)
GO:0070370	cellular heat acclimation	biological process	1/234	1/681	0.34361	1	TRINITY_DN3496_c4_g3(-1.18941672544)	TRINITY_DN3496_c4_g3(-1.18941672544)
GO:0070444	oligodendrocyte progenitor proliferation	biological process	1/234	1/681	0.34361	1	TRINITY_DN2990_c3_g1(4.48637222765)	TRINITY_DN2990_c3_g1(4.48637222765)
GO:0070445	regulation of oligodendrocyte progenitor proliferation	biological process	1/234	1/681	0.34361	1	TRINITY_DN2990_c3_g1(4.48637222765)	TRINITY_DN2990_c3_g1(4.48637222765)
GO:0070478	nuclear-transcribed mRNA catabolic process, 3'-5' exonucleolytic nonsense-mediated decay	biological process	1/234	1/681	0.34361	1	TRINITY_DN2882_c2_g4(-1.7756328019)	TRINITY_DN2882_c2_g4(-1.7756328019)
GO:0070481	nuclear-transcribed mRNA catabolic process, non-stop decay	biological process	1/234	1/681	0.34361	1	TRINITY_DN2882_c2_g4(-1.7756328019)	TRINITY_DN2882_c2_g4(-1.7756328019)
GO:0070550	rDNA condensation	biological process	1/234	1/681	0.34361	1	TRINITY_DN2674_c3_g1(-1.20247600187)	TRINITY_DN2674_c3_g1(-1.20247600187)
GO:0070664	negative regulation of leukocyte proliferation	biological process	1/234	1/681	0.34361	1	TRINITY_DN2990_c3_g1(4.48637222765)	TRINITY_DN2990_c3_g1(4.48637222765)
GO:0070682	proteasome regulatory particle assembly	biological process	1/234	1/681	0.34361	1	TRINITY_DN3688_c1_g7(-2.38640377363)	TRINITY_DN3688_c1_g7(-2.38640377363)
GO:0070979	protein K11-linked ubiquitination	biological process	1/234	1/681	0.34361	1	TRINITY_DN2830_c1_g6(-2.81950059698)	TRINITY_DN2830_c1_g6(-2.81950059698)
GO:0070989	oxidative demethylation	biological process	1/234	1/681	0.34361	1	TRINITY_DN3466_c5_g2(-1.56168631845)	TRINITY_DN3466_c5_g2(-1.56168631845)
GO:0071139	resolution of recombination intermediates	biological process	1/234	1/681	0.34361	1	TRINITY_DN2986_c3_g1(-1.95868262638)	TRINITY_DN2986_c3_g1(-1.95868262638)
GO:0071462	cellular response to water stimulus	biological process	1/234	1/681	0.34361	1	TRINITY_DN3502_c0_g1(-1.23001299537)	TRINITY_DN3502_c0_g1(-1.23001299537)
GO:0071465	cellular response to desiccation	biological process	1/234	1/681	0.34361	1	TRINITY_DN3502_c0_g1(-1.23001299537)	TRINITY_DN3502_c0_g1(-1.23001299537)
GO:0071494	cellular response to UV-C	biological process	1/234	1/681	0.34361	1	TRINITY_DN3368_c3_g4(-1.07708134491)	TRINITY_DN3368_c3_g4(-1.07708134491)
GO:0071539	protein localization to centrosome	biological process	1/234	1/681	0.34361	1	TRINITY_DN1551_c0_g1(-2.62773240149)	TRINITY_DN1551_c0_g1(-2.62773240149)
GO:0071604	transforming growth factor beta production	biological process	1/234	1/681	0.34361	1	TRINITY_DN2863_c0_g2(-1.17670982061)	TRINITY_DN2863_c0_g2(-1.17670982061)
GO:0071634	regulation of transforming growth factor beta production	biological process	1/234	1/681	0.34361	1	TRINITY_DN2863_c0_g2(-1.17670982061)	TRINITY_DN2863_c0_g2(-1.17670982061)
GO:0071636	positive regulation of transforming growth factor beta production	biological process	1/234	1/681	0.34361	1	TRINITY_DN2863_c0_g2(-1.17670982061)	TRINITY_DN2863_c0_g2(-1.17670982061)
GO:0072175	epithelial tube formation	biological process	1/234	1/681	0.34361	1	TRINITY_DN1551_c0_g1(-2.62773240149)	TRINITY_DN1551_c0_g1(-2.62773240149)
GO:0072376	protein activation cascade	biological process	1/234	1/681	0.34361	1	TRINITY_DN2863_c0_g2(-1.17670982061)	TRINITY_DN2863_c0_g2(-1.17670982061)
GO:0072498	embryonic skeletal joint development	biological process	1/234	1/681	0.34361	1	TRINITY_DN2990_c3_g1(4.48637222765)	TRINITY_DN2990_c3_g1(4.48637222765)
GO:0072606	interleukin-8 secretion	biological process	1/234	1/681	0.34361	1	TRINITY_DN1453_c0_g1(-2.82693098456)	TRINITY_DN1453_c0_g1(-2.82693098456)
GO:0072697	protein localization to cell cortex	biological process	1/234	1/681	0.34361	1	TRINITY_DN3032_c1_g3(-1.81290474391)	TRINITY_DN3032_c1_g3(-1.81290474391)
GO:0072698	protein localization to microtubule cytoskeleton	biological process	1/234	1/681	0.34361	1	TRINITY_DN1551_c0_g1(-2.62773240149)	TRINITY_DN1551_c0_g1(-2.62773240149)
GO:0075136	response to host	biological process	1/234	1/681	0.34361	1	TRINITY_DN2782_c0_g6(1.65399754879)	TRINITY_DN2782_c0_g6(1.65399754879)
GO:0080092	regulation of pollen tube growth	biological process	1/234	1/681	0.34361	1	TRINITY_DN3324_c1_g1(-1.19910771168)	TRINITY_DN3324_c1_g1(-1.19910771168)
GO:0085029	extracellular matrix assembly	biological process	1/234	1/681	0.34361	1	TRINITY_DN2990_c3_g1(4.48637222765)	TRINITY_DN2990_c3_g1(4.48637222765)
GO:0090143	nucleoid organization	biological process	1/234	1/681	0.34361	1	TRINITY_DN3081_c0_g1(1.24454299096)	TRINITY_DN3081_c0_g1(1.24454299096)
GO:0090307	mitotic spindle assembly	biological process	1/234	1/681	0.34361	1	TRINITY_DN3368_c3_g3(-1.35865189413)	TRINITY_DN3368_c3_g3(-1.35865189413)
GO:0090311	regulation of protein deacetylation	biological process	1/234	1/681	0.34361	1	TRINITY_DN3034_c4_g1(-2.34785465768)	TRINITY_DN3034_c4_g1(-2.34785465768)
GO:0090391	granum assembly	biological process	1/234	1/681	0.34361	1	TRINITY_DN1762_c0_g1(1.27810707468)	TRINITY_DN1762_c0_g1(1.27810707468)
GO:0090480	purine nucleotide-sugar transmembrane transport	biological process	1/234	1/681	0.34361	1	TRINITY_DN1373_c0_g1(-2.06665804542)	TRINITY_DN1373_c0_g1(-2.06665804542)
GO:0090657	telomeric loop disassembly	biological process	1/234	1/681	0.34361	1	TRINITY_DN3311_c1_g2(-1.13281740221)	TRINITY_DN3311_c1_g2(-1.13281740221)
GO:0090693	plant organ senescence	biological process	1/234	1/681	0.34361	1	TRINITY_DN2670_c2_g6(-1.02619526061)	TRINITY_DN2670_c2_g6(-1.02619526061)
GO:0090713	immunological memory process	biological process	1/234	1/681	0.34361	1	TRINITY_DN2863_c0_g2(-1.17670982061)	TRINITY_DN2863_c0_g2(-1.17670982061)
GO:0090715	immunological memory formation process	biological process	1/234	1/681	0.34361	1	TRINITY_DN2863_c0_g2(-1.17670982061)	TRINITY_DN2863_c0_g2(-1.17670982061)
GO:0097065	anterior head development	biological process	1/234	1/681	0.34361	1	TRINITY_DN2990_c3_g1(4.48637222765)	TRINITY_DN2990_c3_g1(4.48637222765)
GO:0097176	epoxide metabolic process	biological process	1/234	1/681	0.34361	1	TRINITY_DN6992_c0_g1(-13.2230001252)	TRINITY_DN6992_c0_g1(-13.2230001252)
GO:0097553	calcium ion transmembrane import into cytosol	biological process	1/234	1/681	0.34361	1	TRINITY_DN3032_c1_g3(-1.81290474391)	TRINITY_DN3032_c1_g3(-1.81290474391)
GO:0097577	sequestering of iron ion	biological process	1/234	1/681	0.34361	1	TRINITY_DN3455_c5_g4(-1.38140557462)	TRINITY_DN3455_c5_g4(-1.38140557462)
GO:0098501	polynucleotide dephosphorylation	biological process	1/234	1/681	0.34361	1	TRINITY_DN1268_c0_g1(-2.06811775799)	TRINITY_DN1268_c0_g1(-2.06811775799)
GO:0098502	DNA dephosphorylation	biological process	1/234	1/681	0.34361	1	TRINITY_DN1268_c0_g1(-2.06811775799)	TRINITY_DN1268_c0_g1(-2.06811775799)
GO:0098503	DNA 3' dephosphorylation	biological process	1/234	1/681	0.34361	1	TRINITY_DN1268_c0_g1(-2.06811775799)	TRINITY_DN1268_c0_g1(-2.06811775799)
GO:0098504	DNA 3' dephosphorylation involved in DNA repair	biological process	1/234	1/681	0.34361	1	TRINITY_DN1268_c0_g1(-2.06811775799)	TRINITY_DN1268_c0_g1(-2.06811775799)
GO:0098506	polynucleotide 3' dephosphorylation	biological process	1/234	1/681	0.34361	1	TRINITY_DN1268_c0_g1(-2.06811775799)	TRINITY_DN1268_c0_g1(-2.06811775799)
GO:0098530	positive regulation of strand invasion	biological process	1/234	1/681	0.34361	1	TRINITY_DN3311_c1_g2(-1.13281740221)	TRINITY_DN3311_c1_g2(-1.13281740221)
GO:0098543	detection of other organism	biological process	1/234	1/681	0.34361	1	TRINITY_DN1453_c0_g1(-2.82693098456)	TRINITY_DN1453_c0_g1(-2.82693098456)
GO:0098581	detection of external biotic stimulus	biological process	1/234	1/681	0.34361	1	TRINITY_DN1453_c0_g1(-2.82693098456)	TRINITY_DN1453_c0_g1(-2.82693098456)
GO:0140141	mitochondrial potassium ion transmembrane transport	biological process	1/234	1/681	0.34361	1	TRINITY_DN1903_c0_g1(-1.0299931519)	TRINITY_DN1903_c0_g1(-1.0299931519)
GO:1900115	extracellular regulation of signal transduction	biological process	1/234	1/681	0.34361	1	TRINITY_DN2863_c0_g2(-1.17670982061)	TRINITY_DN2863_c0_g2(-1.17670982061)
GO:1900116	extracellular negative regulation of signal transduction	biological process	1/234	1/681	0.34361	1	TRINITY_DN2863_c0_g2(-1.17670982061)	TRINITY_DN2863_c0_g2(-1.17670982061)
GO:1900368	regulation of RNA interference	biological process	1/234	1/681	0.34361	1	TRINITY_DN3522_c0_g5(-1.94485287609)	TRINITY_DN3522_c0_g5(-1.94485287609)
GO:1901000	regulation of response to salt stress	biological process	1/234	1/681	0.34361	1	TRINITY_DN3324_c1_g1(-1.19910771168)	TRINITY_DN3324_c1_g1(-1.19910771168)
GO:1901001	negative regulation of response to salt stress	biological process	1/234	1/681	0.34361	1	TRINITY_DN3324_c1_g1(-1.19910771168)	TRINITY_DN3324_c1_g1(-1.19910771168)
GO:1901002	positive regulation of response to salt stress	biological process	1/234	1/681	0.34361	1	TRINITY_DN3324_c1_g1(-1.19910771168)	TRINITY_DN3324_c1_g1(-1.19910771168)
GO:1901214	regulation of neuron death	biological process	1/234	1/681	0.34361	1	TRINITY_DN497_c0_g1(3.34017844478)	TRINITY_DN497_c0_g1(3.34017844478)
GO:1901259	chloroplast rRNA processing	biological process	1/234	1/681	0.34361	1	TRINITY_DN2783_c2_g1(-1.66691697296)	TRINITY_DN2783_c2_g1(-1.66691697296)
GO:1901376	organic heteropentacyclic compound metabolic process	biological process	1/234	1/681	0.34361	1	TRINITY_DN6992_c0_g1(-13.2230001252)	TRINITY_DN6992_c0_g1(-13.2230001252)
GO:1901378	organic heteropentacyclic compound biosynthetic process	biological process	1/234	1/681	0.34361	1	TRINITY_DN6992_c0_g1(-13.2230001252)	TRINITY_DN6992_c0_g1(-13.2230001252)
GO:1901503	ether biosynthetic process	biological process	1/234	1/681	0.34361	1	TRINITY_DN6992_c0_g1(-13.2230001252)	TRINITY_DN6992_c0_g1(-13.2230001252)
GO:1901616	organic hydroxy compound catabolic process	biological process	1/234	1/681	0.34361	1	TRINITY_DN2917_c3_g1(-1.13937325966)	TRINITY_DN2917_c3_g1(-1.13937325966)
GO:1901657	glycosyl compound metabolic process	biological process	1/234	1/681	0.34361	1	TRINITY_DN3463_c3_g2(1.40977209201)	TRINITY_DN3463_c3_g2(1.40977209201)
GO:1901659	glycosyl compound biosynthetic process	biological process	1/234	1/681	0.34361	1	TRINITY_DN3463_c3_g2(1.40977209201)	TRINITY_DN3463_c3_g2(1.40977209201)
GO:1901725	regulation of histone deacetylase activity	biological process	1/234	1/681	0.34361	1	TRINITY_DN3034_c4_g1(-2.34785465768)	TRINITY_DN3034_c4_g1(-2.34785465768)
GO:1901726	negative regulation of histone deacetylase activity	biological process	1/234	1/681	0.34361	1	TRINITY_DN3034_c4_g1(-2.34785465768)	TRINITY_DN3034_c4_g1(-2.34785465768)
GO:1901979	regulation of inward rectifier potassium channel activity	biological process	1/234	1/681	0.34361	1	TRINITY_DN3324_c1_g1(-1.19910771168)	TRINITY_DN3324_c1_g1(-1.19910771168)
GO:1902084	fumagillin metabolic process	biological process	1/234	1/681	0.34361	1	TRINITY_DN6992_c0_g1(-13.2230001252)	TRINITY_DN6992_c0_g1(-13.2230001252)
GO:1902086	fumagillin biosynthetic process	biological process	1/234	1/681	0.34361	1	TRINITY_DN6992_c0_g1(-13.2230001252)	TRINITY_DN6992_c0_g1(-13.2230001252)
GO:1902106	negative regulation of leukocyte differentiation	biological process	1/234	1/681	0.34361	1	TRINITY_DN2990_c3_g1(4.48637222765)	TRINITY_DN2990_c3_g1(4.48637222765)
GO:1902299	pre-replicative complex assembly involved in cell cycle DNA replication	biological process	1/234	1/681	0.34361	1	TRINITY_DN3172_c3_g4(-1.50849298535)	TRINITY_DN3172_c3_g4(-1.50849298535)
GO:1902456	regulation of stomatal opening	biological process	1/234	1/681	0.34361	1	TRINITY_DN3324_c1_g1(-1.19910771168)	TRINITY_DN3324_c1_g1(-1.19910771168)
GO:1902570	protein localization to nucleolus	biological process	1/234	1/681	0.34361	1	TRINITY_DN3311_c1_g2(-1.13281740221)	TRINITY_DN3311_c1_g2(-1.13281740221)
GO:1902584	positive regulation of response to water deprivation	biological process	1/234	1/681	0.34361	1	TRINITY_DN3324_c1_g1(-1.19910771168)	TRINITY_DN3324_c1_g1(-1.19910771168)
GO:1902609	(R)-2-hydroxy-alpha-linolenic acid biosynthetic process	biological process	1/234	1/681	0.34361	1	TRINITY_DN1383_c0_g2(-5.09453204951)	TRINITY_DN1383_c0_g2(-5.09453204951)
GO:1903038	negative regulation of leukocyte cell-cell adhesion	biological process	1/234	1/681	0.34361	1	TRINITY_DN2990_c3_g1(4.48637222765)	TRINITY_DN2990_c3_g1(4.48637222765)
GO:1903169	regulation of calcium ion transmembrane transport	biological process	1/234	1/681	0.34361	1	TRINITY_DN3032_c1_g3(-1.81290474391)	TRINITY_DN3032_c1_g3(-1.81290474391)
GO:1903320	regulation of protein modification by small protein conjugation or removal	biological process	1/234	1/681	0.34361	1	TRINITY_DN2990_c3_g1(4.48637222765)	TRINITY_DN2990_c3_g1(4.48637222765)
GO:1903321	negative regulation of protein modification by small protein conjugation or removal	biological process	1/234	1/681	0.34361	1	TRINITY_DN2990_c3_g1(4.48637222765)	TRINITY_DN2990_c3_g1(4.48637222765)
GO:1903326	regulation of tRNA metabolic process	biological process	1/234	1/681	0.34361	1	TRINITY_DN3602_c4_g2(-2.95532582631)	TRINITY_DN3602_c4_g2(-2.95532582631)
GO:1903328	positive regulation of tRNA metabolic process	biological process	1/234	1/681	0.34361	1	TRINITY_DN3602_c4_g2(-2.95532582631)	TRINITY_DN3602_c4_g2(-2.95532582631)
GO:1903531	negative regulation of secretion by cell	biological process	1/234	1/681	0.34361	1	TRINITY_DN1453_c0_g1(-2.82693098456)	TRINITY_DN1453_c0_g1(-2.82693098456)
GO:1903959	regulation of anion transmembrane transport	biological process	1/234	1/681	0.34361	1	TRINITY_DN3324_c1_g1(-1.19910771168)	TRINITY_DN3324_c1_g1(-1.19910771168)
GO:1904029	regulation of cyclin-dependent protein kinase activity	biological process	1/234	1/681	0.34361	1	TRINITY_DN1551_c0_g1(-2.62773240149)	TRINITY_DN1551_c0_g1(-2.62773240149)
GO:1904031	positive regulation of cyclin-dependent protein kinase activity	biological process	1/234	1/681	0.34361	1	TRINITY_DN1551_c0_g1(-2.62773240149)	TRINITY_DN1551_c0_g1(-2.62773240149)
GO:1904353	regulation of telomere capping	biological process	1/234	1/681	0.34361	1	TRINITY_DN1268_c0_g1(-2.06811775799)	TRINITY_DN1268_c0_g1(-2.06811775799)
GO:1904355	positive regulation of telomere capping	biological process	1/234	1/681	0.34361	1	TRINITY_DN1268_c0_g1(-2.06811775799)	TRINITY_DN1268_c0_g1(-2.06811775799)
GO:1904358	positive regulation of telomere maintenance via telomere lengthening	biological process	1/234	1/681	0.34361	1	TRINITY_DN1268_c0_g1(-2.06811775799)	TRINITY_DN1268_c0_g1(-2.06811775799)
GO:1904375	regulation of protein localization to cell periphery	biological process	1/234	1/681	0.34361	1	TRINITY_DN3032_c1_g3(-1.81290474391)	TRINITY_DN3032_c1_g3(-1.81290474391)
GO:1904427	positive regulation of calcium ion transmembrane transport	biological process	1/234	1/681	0.34361	1	TRINITY_DN3032_c1_g3(-1.81290474391)	TRINITY_DN3032_c1_g3(-1.81290474391)
GO:1904669	ATP export	biological process	1/234	1/681	0.34361	1	TRINITY_DN3343_c1_g7(1.11505558557)	TRINITY_DN3343_c1_g7(1.11505558557)
GO:1904776	regulation of protein localization to cell cortex	biological process	1/234	1/681	0.34361	1	TRINITY_DN3032_c1_g3(-1.81290474391)	TRINITY_DN3032_c1_g3(-1.81290474391)
GO:1905508	protein localization to microtubule organizing center	biological process	1/234	1/681	0.34361	1	TRINITY_DN1551_c0_g1(-2.62773240149)	TRINITY_DN1551_c0_g1(-2.62773240149)
GO:1905515	non-motile cilium assembly	biological process	1/234	1/681	0.34361	1	TRINITY_DN1551_c0_g1(-2.62773240149)	TRINITY_DN1551_c0_g1(-2.62773240149)
GO:1990069	stomatal opening	biological process	1/234	1/681	0.34361	1	TRINITY_DN3324_c1_g1(-1.19910771168)	TRINITY_DN3324_c1_g1(-1.19910771168)
GO:1990823	response to leukemia inhibitory factor	biological process	1/234	1/681	0.34361	1	TRINITY_DN497_c0_g1(3.34017844478)	TRINITY_DN497_c0_g1(3.34017844478)
GO:1990830	cellular response to leukemia inhibitory factor	biological process	1/234	1/681	0.34361	1	TRINITY_DN497_c0_g1(3.34017844478)	TRINITY_DN497_c0_g1(3.34017844478)
GO:1990937	xylan acetylation	biological process	1/234	1/681	0.34361	1	TRINITY_DN3722_c1_g7(-2.33487818804)	TRINITY_DN3722_c1_g7(-2.33487818804)
GO:2000008	regulation of protein localization to cell surface	biological process	1/234	1/681	0.34361	1	TRINITY_DN2990_c3_g1(4.48637222765)	TRINITY_DN2990_c3_g1(4.48637222765)
GO:2000010	positive regulation of protein localization to cell surface	biological process	1/234	1/681	0.34361	1	TRINITY_DN2990_c3_g1(4.48637222765)	TRINITY_DN2990_c3_g1(4.48637222765)
GO:2000070	regulation of response to water deprivation	biological process	1/234	1/681	0.34361	1	TRINITY_DN3324_c1_g1(-1.19910771168)	TRINITY_DN3324_c1_g1(-1.19910771168)
GO:2000105	positive regulation of DNA-dependent DNA replication	biological process	1/234	1/681	0.34361	1	TRINITY_DN3034_c3_g2(-2.78869539746)	TRINITY_DN3034_c3_g2(-2.78869539746)
GO:2000235	regulation of tRNA processing	biological process	1/234	1/681	0.34361	1	TRINITY_DN3602_c4_g2(-2.95532582631)	TRINITY_DN3602_c4_g2(-2.95532582631)
GO:2000237	positive regulation of tRNA processing	biological process	1/234	1/681	0.34361	1	TRINITY_DN3602_c4_g2(-2.95532582631)	TRINITY_DN3602_c4_g2(-2.95532582631)
GO:2000257	regulation of protein activation cascade	biological process	1/234	1/681	0.34361	1	TRINITY_DN2863_c0_g2(-1.17670982061)	TRINITY_DN2863_c0_g2(-1.17670982061)
GO:2000258	negative regulation of protein activation cascade	biological process	1/234	1/681	0.34361	1	TRINITY_DN2863_c0_g2(-1.17670982061)	TRINITY_DN2863_c0_g2(-1.17670982061)
GO:2000269	regulation of fibroblast apoptotic process	biological process	1/234	1/681	0.34361	1	TRINITY_DN3590_c3_g1(-1.35288789047)	TRINITY_DN3590_c3_g1(-1.35288789047)
GO:2000274	regulation of epithelial cell migration, open tracheal system	biological process	1/234	1/681	0.34361	1	TRINITY_DN2990_c3_g1(4.48637222765)	TRINITY_DN2990_c3_g1(4.48637222765)
GO:2000482	regulation of interleukin-8 secretion	biological process	1/234	1/681	0.34361	1	TRINITY_DN1453_c0_g1(-2.82693098456)	TRINITY_DN1453_c0_g1(-2.82693098456)
GO:2000483	negative regulation of interleukin-8 secretion	biological process	1/234	1/681	0.34361	1	TRINITY_DN1453_c0_g1(-2.82693098456)	TRINITY_DN1453_c0_g1(-2.82693098456)
GO:2000573	positive regulation of DNA biosynthetic process	biological process	1/234	1/681	0.34361	1	TRINITY_DN1268_c0_g1(-2.06811775799)	TRINITY_DN1268_c0_g1(-2.06811775799)
GO:2001234	negative regulation of apoptotic signaling pathway	biological process	1/234	1/681	0.34361	1	TRINITY_DN2512_c2_g5(-3.78741905927)	TRINITY_DN2512_c2_g5(-3.78741905927)
GO:2001243	negative regulation of intrinsic apoptotic signaling pathway	biological process	1/234	1/681	0.34361	1	TRINITY_DN2512_c2_g5(-3.78741905927)	TRINITY_DN2512_c2_g5(-3.78741905927)
GO:0048583	regulation of response to stimulus	biological process	27/234	73/681	0.35258	1	TRINITY_DN1357_c0_g1(-2.55339730538),TRINITY_DN1896_c0_g1(-1.43122376696),TRINITY_DN2244_c0_g1(-2.14833104305),TRINITY_DN2512_c2_g5(-3.78741905927),TRINITY_DN2618_c2_g3(1.16746035949),TRINITY_DN2670_c0_g1(-1.16807489944),TRINITY_DN2670_c2_g4(-1.43011048969),TRINITY_DN2677_c1_g2(1.75084897723),TRINITY_DN2863_c0_g2(-1.17670982061),TRINITY_DN2948_c3_g2(-1.25152991183),TRINITY_DN2990_c3_g1(4.48637222…	TRINITY_DN1357_c0_g1(-2.55339730538),TRINITY_DN1896_c0_g1(-1.43122376696),TRINITY_DN2244_c0_g1(-2.14833104305),TRINITY_DN2512_c2_g5(-3.78741905927),TRINITY_DN2618_c2_g3(1.16746035949),TRINITY_DN2670_c0_g1(-1.16807489944),TRINITY_DN2670_c2_g4(-1.43011048969),TRINITY_DN2677_c1_g2(1.75084897723),TRINITY_DN2863_c0_g2(-1.17670982061),TRINITY_DN2948_c3_g2(-1.25152991183),TRINITY_DN2990_c3_g1(4.48637222…
GO:0007399	nervous system development	biological process	11/234	28/681	0.35441	1	TRINITY_DN1551_c0_g1(-2.62773240149),TRINITY_DN2244_c0_g1(-2.14833104305),TRINITY_DN2670_c0_g1(-1.16807489944),TRINITY_DN2948_c3_g2(-1.25152991183),TRINITY_DN2990_c3_g1(4.48637222765),TRINITY_DN3160_c3_g6(1.13017127252),TRINITY_DN3282_c0_g4(1.20593803666),TRINITY_DN3344_c2_g2(-1.07984282302),TRINITY_DN3416_c0_g3(-1.06697066005),TRINITY_DN483_c0_g1(-1.37439231237),TRINITY_DN497_c0_g1(3.34017844478)	TRINITY_DN1551_c0_g1(-2.62773240149),TRINITY_DN2244_c0_g1(-2.14833104305),TRINITY_DN2670_c0_g1(-1.16807489944),TRINITY_DN2948_c3_g2(-1.25152991183),TRINITY_DN2990_c3_g1(4.48637222765),TRINITY_DN3160_c3_g6(1.13017127252),TRINITY_DN3282_c0_g4(1.20593803666),TRINITY_DN3344_c2_g2(-1.07984282302),TRINITY_DN3416_c0_g3(-1.06697066005),TRINITY_DN483_c0_g1(-1.37439231237),TRINITY_DN497_c0_g1(3.34017844478)
GO:0032879	regulation of localization	biological process	16/234	42/681	0.35523	1	TRINITY_DN1357_c0_g1(-2.55339730538),TRINITY_DN1453_c0_g1(-2.82693098456),TRINITY_DN2559_c3_g1(-1.41187808043),TRINITY_DN2618_c2_g3(1.16746035949),TRINITY_DN2642_c2_g4(2.69107002639),TRINITY_DN2677_c1_g2(1.75084897723),TRINITY_DN2990_c3_g1(4.48637222765),TRINITY_DN2991_c1_g2(-1.38723740444),TRINITY_DN3032_c1_g3(-1.81290474391),TRINITY_DN3118_c6_g1(-2.15189148233),TRINITY_DN3130_c0_g1(-1.113717948…	TRINITY_DN1357_c0_g1(-2.55339730538),TRINITY_DN1453_c0_g1(-2.82693098456),TRINITY_DN2559_c3_g1(-1.41187808043),TRINITY_DN2618_c2_g3(1.16746035949),TRINITY_DN2642_c2_g4(2.69107002639),TRINITY_DN2677_c1_g2(1.75084897723),TRINITY_DN2990_c3_g1(4.48637222765),TRINITY_DN2991_c1_g2(-1.38723740444),TRINITY_DN3032_c1_g3(-1.81290474391),TRINITY_DN3118_c6_g1(-2.15189148233),TRINITY_DN3130_c0_g1(-1.113717948…
GO:0071840	cellular component organization or biogenesis	biological process	81/234	228/681	0.35525	1	TRINITY_DN109_c0_g1(-2.43108989434),TRINITY_DN1245_c0_g2(-3.43593361414),TRINITY_DN1267_c0_g1(-3.74317437745),TRINITY_DN1268_c0_g1(-2.06811775799),TRINITY_DN1349_c0_g1(1.13858735078),TRINITY_DN1383_c0_g2(-5.09453204951),TRINITY_DN1483_c0_g1(-2.10294444973),TRINITY_DN1551_c0_g1(-2.62773240149),TRINITY_DN1577_c0_g1(-1.27109622825),TRINITY_DN1762_c0_g1(1.27810707468),TRINITY_DN2244_c0_g1(-2.14833104…	TRINITY_DN109_c0_g1(-2.43108989434),TRINITY_DN1245_c0_g2(-3.43593361414),TRINITY_DN1267_c0_g1(-3.74317437745),TRINITY_DN1268_c0_g1(-2.06811775799),TRINITY_DN1349_c0_g1(1.13858735078),TRINITY_DN1383_c0_g2(-5.09453204951),TRINITY_DN1483_c0_g1(-2.10294444973),TRINITY_DN1551_c0_g1(-2.62773240149),TRINITY_DN1577_c0_g1(-1.27109622825),TRINITY_DN1762_c0_g1(1.27810707468),TRINITY_DN2244_c0_g1(-2.14833104…
GO:0051234	establishment of localization	biological process	64/234	179/681	0.35597	1	TRINITY_DN109_c0_g1(-2.43108989434),TRINITY_DN1269_c0_g1(-2.69702190868),TRINITY_DN1357_c0_g1(-2.55339730538),TRINITY_DN1373_c0_g1(-2.06665804542),TRINITY_DN1453_c0_g1(-2.82693098456),TRINITY_DN1483_c0_g1(-2.10294444973),TRINITY_DN1762_c0_g1(1.27810707468),TRINITY_DN1896_c0_g1(-1.43122376696),TRINITY_DN1903_c0_g1(-1.0299931519),TRINITY_DN1964_c0_g1(-1.68853346027),TRINITY_DN2198_c0_g1(1.025928826…	TRINITY_DN109_c0_g1(-2.43108989434),TRINITY_DN1269_c0_g1(-2.69702190868),TRINITY_DN1357_c0_g1(-2.55339730538),TRINITY_DN1373_c0_g1(-2.06665804542),TRINITY_DN1453_c0_g1(-2.82693098456),TRINITY_DN1483_c0_g1(-2.10294444973),TRINITY_DN1762_c0_g1(1.27810707468),TRINITY_DN1896_c0_g1(-1.43122376696),TRINITY_DN1903_c0_g1(-1.0299931519),TRINITY_DN1964_c0_g1(-1.68853346027),TRINITY_DN2198_c0_g1(1.025928826…
GO:0051179	localization	biological process	73/234	205/681	0.35742	1	TRINITY_DN109_c0_g1(-2.43108989434),TRINITY_DN1245_c0_g2(-3.43593361414),TRINITY_DN1269_c0_g1(-2.69702190868),TRINITY_DN1357_c0_g1(-2.55339730538),TRINITY_DN1373_c0_g1(-2.06665804542),TRINITY_DN1453_c0_g1(-2.82693098456),TRINITY_DN1483_c0_g1(-2.10294444973),TRINITY_DN1551_c0_g1(-2.62773240149),TRINITY_DN1762_c0_g1(1.27810707468),TRINITY_DN1896_c0_g1(-1.43122376696),TRINITY_DN1903_c0_g1(-1.0299931…	TRINITY_DN109_c0_g1(-2.43108989434),TRINITY_DN1245_c0_g2(-3.43593361414),TRINITY_DN1269_c0_g1(-2.69702190868),TRINITY_DN1357_c0_g1(-2.55339730538),TRINITY_DN1373_c0_g1(-2.06665804542),TRINITY_DN1453_c0_g1(-2.82693098456),TRINITY_DN1483_c0_g1(-2.10294444973),TRINITY_DN1551_c0_g1(-2.62773240149),TRINITY_DN1762_c0_g1(1.27810707468),TRINITY_DN1896_c0_g1(-1.43122376696),TRINITY_DN1903_c0_g1(-1.0299931…
GO:0006520	cellular amino acid metabolic process	biological process	7/234	17/681	0.35858	1	TRINITY_DN2481_c5_g1(-1.72793019786),TRINITY_DN2698_c1_g2(-3.10626025919),TRINITY_DN2698_c1_g3(-1.59157343931),TRINITY_DN2989_c0_g3(-1.94950554293),TRINITY_DN3023_c1_g1(1.29467178693),TRINITY_DN3345_c3_g2(-1.99589681954),TRINITY_DN3463_c3_g2(1.40977209201)	TRINITY_DN2481_c5_g1(-1.72793019786),TRINITY_DN2698_c1_g2(-3.10626025919),TRINITY_DN2698_c1_g3(-1.59157343931),TRINITY_DN2989_c0_g3(-1.94950554293),TRINITY_DN3023_c1_g1(1.29467178693),TRINITY_DN3345_c3_g2(-1.99589681954),TRINITY_DN3463_c3_g2(1.40977209201)
GO:0009620	response to fungus	biological process	7/234	17/681	0.35858	1	TRINITY_DN1383_c0_g2(-5.09453204951),TRINITY_DN2506_c1_g2(2.69390264406),TRINITY_DN2670_c2_g6(-1.02619526061),TRINITY_DN2727_c2_g2(2.80700894859),TRINITY_DN3324_c1_g1(-1.19910771168),TRINITY_DN3436_c0_g2(-1.03382554582),TRINITY_DN3722_c1_g7(-2.33487818804)	TRINITY_DN1383_c0_g2(-5.09453204951),TRINITY_DN2506_c1_g2(2.69390264406),TRINITY_DN2670_c2_g6(-1.02619526061),TRINITY_DN2727_c2_g2(2.80700894859),TRINITY_DN3324_c1_g1(-1.19910771168),TRINITY_DN3436_c0_g2(-1.03382554582),TRINITY_DN3722_c1_g7(-2.33487818804)
GO:0005976	polysaccharide metabolic process	biological process	8/234	20/681	0.37425	1	TRINITY_DN2244_c0_g1(-2.14833104305),TRINITY_DN2670_c0_g1(-1.16807489944),TRINITY_DN2955_c0_g3(1.04682740551),TRINITY_DN3158_c1_g1(-2.93602217915),TRINITY_DN3409_c1_g1(-1.36361747936),TRINITY_DN3409_c1_g2(-2.12264257282),TRINITY_DN3502_c0_g1(-1.23001299537),TRINITY_DN3722_c1_g7(-2.33487818804)	TRINITY_DN2244_c0_g1(-2.14833104305),TRINITY_DN2670_c0_g1(-1.16807489944),TRINITY_DN2955_c0_g3(1.04682740551),TRINITY_DN3158_c1_g1(-2.93602217915),TRINITY_DN3409_c1_g1(-1.36361747936),TRINITY_DN3409_c1_g2(-2.12264257282),TRINITY_DN3502_c0_g1(-1.23001299537),TRINITY_DN3722_c1_g7(-2.33487818804)
GO:0006364	rRNA processing	biological process	8/234	20/681	0.37425	1	TRINITY_DN2783_c2_g1(-1.66691697296),TRINITY_DN3002_c7_g7(1.15397086811),TRINITY_DN3039_c1_g2(-1.41066512147),TRINITY_DN3160_c3_g6(1.13017127252),TRINITY_DN3343_c1_g7(1.11505558557),TRINITY_DN3483_c3_g1(1.58625165776),TRINITY_DN3522_c0_g2(-1.86254793253),TRINITY_DN3616_c2_g1(1.5574445161)	TRINITY_DN2783_c2_g1(-1.66691697296),TRINITY_DN3002_c7_g7(1.15397086811),TRINITY_DN3039_c1_g2(-1.41066512147),TRINITY_DN3160_c3_g6(1.13017127252),TRINITY_DN3343_c1_g7(1.11505558557),TRINITY_DN3483_c3_g1(1.58625165776),TRINITY_DN3522_c0_g2(-1.86254793253),TRINITY_DN3616_c2_g1(1.5574445161)
GO:0016072	rRNA metabolic process	biological process	8/234	20/681	0.37425	1	TRINITY_DN2783_c2_g1(-1.66691697296),TRINITY_DN3002_c7_g7(1.15397086811),TRINITY_DN3039_c1_g2(-1.41066512147),TRINITY_DN3160_c3_g6(1.13017127252),TRINITY_DN3343_c1_g7(1.11505558557),TRINITY_DN3483_c3_g1(1.58625165776),TRINITY_DN3522_c0_g2(-1.86254793253),TRINITY_DN3616_c2_g1(1.5574445161)	TRINITY_DN2783_c2_g1(-1.66691697296),TRINITY_DN3002_c7_g7(1.15397086811),TRINITY_DN3039_c1_g2(-1.41066512147),TRINITY_DN3160_c3_g6(1.13017127252),TRINITY_DN3343_c1_g7(1.11505558557),TRINITY_DN3483_c3_g1(1.58625165776),TRINITY_DN3522_c0_g2(-1.86254793253),TRINITY_DN3616_c2_g1(1.5574445161)
GO:0000271	polysaccharide biosynthetic process	biological process	4/234	9/681	0.37467	1	TRINITY_DN2244_c0_g1(-2.14833104305),TRINITY_DN2670_c0_g1(-1.16807489944),TRINITY_DN3502_c0_g1(-1.23001299537),TRINITY_DN3722_c1_g7(-2.33487818804)	TRINITY_DN2244_c0_g1(-2.14833104305),TRINITY_DN2670_c0_g1(-1.16807489944),TRINITY_DN3502_c0_g1(-1.23001299537),TRINITY_DN3722_c1_g7(-2.33487818804)
GO:0000819	sister chromatid segregation	biological process	4/234	9/681	0.37467	1	TRINITY_DN2674_c3_g1(-1.20247600187),TRINITY_DN2830_c1_g6(-2.81950059698),TRINITY_DN3522_c0_g5(-1.94485287609),TRINITY_DN3688_c1_g7(-2.38640377363)	TRINITY_DN2674_c3_g1(-1.20247600187),TRINITY_DN2830_c1_g6(-2.81950059698),TRINITY_DN3522_c0_g5(-1.94485287609),TRINITY_DN3688_c1_g7(-2.38640377363)
GO:0006606	protein import into nucleus	biological process	4/234	9/681	0.37467	1	TRINITY_DN2618_c2_g3(1.16746035949),TRINITY_DN3512_c0_g2(-1.87901474245),TRINITY_DN3656_c1_g1(-2.08721167236),TRINITY_DN3656_c1_g5(-3.02684114829)	TRINITY_DN2618_c2_g3(1.16746035949),TRINITY_DN3512_c0_g2(-1.87901474245),TRINITY_DN3656_c1_g1(-2.08721167236),TRINITY_DN3656_c1_g5(-3.02684114829)
GO:0007264	small GTPase mediated signal transduction	biological process	4/234	9/681	0.37467	1	TRINITY_DN2618_c2_g3(1.16746035949),TRINITY_DN3512_c0_g2(-1.87901474245),TRINITY_DN3656_c1_g1(-2.08721167236),TRINITY_DN3656_c1_g5(-3.02684114829)	TRINITY_DN2618_c2_g3(1.16746035949),TRINITY_DN3512_c0_g2(-1.87901474245),TRINITY_DN3656_c1_g1(-2.08721167236),TRINITY_DN3656_c1_g5(-3.02684114829)
GO:0007265	Ras protein signal transduction	biological process	4/234	9/681	0.37467	1	TRINITY_DN2618_c2_g3(1.16746035949),TRINITY_DN3512_c0_g2(-1.87901474245),TRINITY_DN3656_c1_g1(-2.08721167236),TRINITY_DN3656_c1_g5(-3.02684114829)	TRINITY_DN2618_c2_g3(1.16746035949),TRINITY_DN3512_c0_g2(-1.87901474245),TRINITY_DN3656_c1_g1(-2.08721167236),TRINITY_DN3656_c1_g5(-3.02684114829)
GO:0008652	cellular amino acid biosynthetic process	biological process	4/234	9/681	0.37467	1	TRINITY_DN2698_c1_g2(-3.10626025919),TRINITY_DN2698_c1_g3(-1.59157343931),TRINITY_DN3023_c1_g1(1.29467178693),TRINITY_DN3463_c3_g2(1.40977209201)	TRINITY_DN2698_c1_g2(-3.10626025919),TRINITY_DN2698_c1_g3(-1.59157343931),TRINITY_DN3023_c1_g1(1.29467178693),TRINITY_DN3463_c3_g2(1.40977209201)
GO:0009751	response to salicylic acid	biological process	4/234	9/681	0.37467	1	TRINITY_DN1383_c0_g2(-5.09453204951),TRINITY_DN3324_c1_g1(-1.19910771168),TRINITY_DN3436_c0_g2(-1.03382554582),TRINITY_DN3600_c1_g3(3.14748655044)	TRINITY_DN1383_c0_g2(-5.09453204951),TRINITY_DN3324_c1_g1(-1.19910771168),TRINITY_DN3436_c0_g2(-1.03382554582),TRINITY_DN3600_c1_g3(3.14748655044)
GO:0010638	positive regulation of organelle organization	biological process	4/234	9/681	0.37467	1	TRINITY_DN1268_c0_g1(-2.06811775799),TRINITY_DN2624_c3_g2(-1.7395971044),TRINITY_DN2830_c1_g6(-2.81950059698),TRINITY_DN3688_c1_g7(-2.38640377363)	TRINITY_DN1268_c0_g1(-2.06811775799),TRINITY_DN2624_c3_g2(-1.7395971044),TRINITY_DN2830_c1_g6(-2.81950059698),TRINITY_DN3688_c1_g7(-2.38640377363)
GO:0033692	cellular polysaccharide biosynthetic process	biological process	4/234	9/681	0.37467	1	TRINITY_DN2244_c0_g1(-2.14833104305),TRINITY_DN2670_c0_g1(-1.16807489944),TRINITY_DN3502_c0_g1(-1.23001299537),TRINITY_DN3722_c1_g7(-2.33487818804)	TRINITY_DN2244_c0_g1(-2.14833104305),TRINITY_DN2670_c0_g1(-1.16807489944),TRINITY_DN3502_c0_g1(-1.23001299537),TRINITY_DN3722_c1_g7(-2.33487818804)
GO:0034637	cellular carbohydrate biosynthetic process	biological process	4/234	9/681	0.37467	1	TRINITY_DN2244_c0_g1(-2.14833104305),TRINITY_DN2670_c0_g1(-1.16807489944),TRINITY_DN3502_c0_g1(-1.23001299537),TRINITY_DN3722_c1_g7(-2.33487818804)	TRINITY_DN2244_c0_g1(-2.14833104305),TRINITY_DN2670_c0_g1(-1.16807489944),TRINITY_DN3502_c0_g1(-1.23001299537),TRINITY_DN3722_c1_g7(-2.33487818804)
GO:0043066	negative regulation of apoptotic process	biological process	4/234	9/681	0.37467	1	TRINITY_DN1267_c0_g1(-3.74317437745),TRINITY_DN1551_c0_g1(-2.62773240149),TRINITY_DN2512_c2_g5(-3.78741905927),TRINITY_DN2990_c3_g1(4.48637222765)	TRINITY_DN1267_c0_g1(-3.74317437745),TRINITY_DN1551_c0_g1(-2.62773240149),TRINITY_DN2512_c2_g5(-3.78741905927),TRINITY_DN2990_c3_g1(4.48637222765)
GO:0051170	import into nucleus	biological process	4/234	9/681	0.37467	1	TRINITY_DN2618_c2_g3(1.16746035949),TRINITY_DN3512_c0_g2(-1.87901474245),TRINITY_DN3656_c1_g1(-2.08721167236),TRINITY_DN3656_c1_g5(-3.02684114829)	TRINITY_DN2618_c2_g3(1.16746035949),TRINITY_DN3512_c0_g2(-1.87901474245),TRINITY_DN3656_c1_g1(-2.08721167236),TRINITY_DN3656_c1_g5(-3.02684114829)
GO:0051222	positive regulation of protein transport	biological process	4/234	9/681	0.37467	1	TRINITY_DN2618_c2_g3(1.16746035949),TRINITY_DN3512_c0_g2(-1.87901474245),TRINITY_DN3656_c1_g1(-2.08721167236),TRINITY_DN3656_c1_g5(-3.02684114829)	TRINITY_DN2618_c2_g3(1.16746035949),TRINITY_DN3512_c0_g2(-1.87901474245),TRINITY_DN3656_c1_g1(-2.08721167236),TRINITY_DN3656_c1_g5(-3.02684114829)
GO:0060173	limb development	biological process	4/234	9/681	0.37467	1	TRINITY_DN2990_c3_g1(4.48637222765),TRINITY_DN3135_c2_g3(1.84163748525),TRINITY_DN3238_c1_g1(4.68706194956),TRINITY_DN3355_c2_g2(-1.83919966724)	TRINITY_DN2990_c3_g1(4.48637222765),TRINITY_DN3135_c2_g3(1.84163748525),TRINITY_DN3238_c1_g1(4.68706194956),TRINITY_DN3355_c2_g2(-1.83919966724)
GO:1901607	alpha-amino acid biosynthetic process	biological process	4/234	9/681	0.37467	1	TRINITY_DN2698_c1_g2(-3.10626025919),TRINITY_DN2698_c1_g3(-1.59157343931),TRINITY_DN3023_c1_g1(1.29467178693),TRINITY_DN3463_c3_g2(1.40977209201)	TRINITY_DN2698_c1_g2(-3.10626025919),TRINITY_DN2698_c1_g3(-1.59157343931),TRINITY_DN3023_c1_g1(1.29467178693),TRINITY_DN3463_c3_g2(1.40977209201)
GO:1904951	positive regulation of establishment of protein localization	biological process	4/234	9/681	0.37467	1	TRINITY_DN2618_c2_g3(1.16746035949),TRINITY_DN3512_c0_g2(-1.87901474245),TRINITY_DN3656_c1_g1(-2.08721167236),TRINITY_DN3656_c1_g5(-3.02684114829)	TRINITY_DN2618_c2_g3(1.16746035949),TRINITY_DN3512_c0_g2(-1.87901474245),TRINITY_DN3656_c1_g1(-2.08721167236),TRINITY_DN3656_c1_g5(-3.02684114829)
GO:0006753	nucleoside phosphate metabolic process	biological process	14/234	37/681	0.38409	1	TRINITY_DN1268_c0_g1(-2.06811775799),TRINITY_DN2378_c0_g1(-2.74436306224),TRINITY_DN2512_c2_g5(-3.78741905927),TRINITY_DN2638_c4_g1(-1.94308971346),TRINITY_DN2638_c4_g3(-1.69613457802),TRINITY_DN2822_c1_g3(1.9375958918),TRINITY_DN3032_c1_g3(-1.81290474391),TRINITY_DN3160_c3_g6(1.13017127252),TRINITY_DN3243_c2_g4(1.8219994837),TRINITY_DN3285_c2_g1(-1.58640393684),TRINITY_DN3327_c4_g1(-1.0711322481…	TRINITY_DN1268_c0_g1(-2.06811775799),TRINITY_DN2378_c0_g1(-2.74436306224),TRINITY_DN2512_c2_g5(-3.78741905927),TRINITY_DN2638_c4_g1(-1.94308971346),TRINITY_DN2638_c4_g3(-1.69613457802),TRINITY_DN2822_c1_g3(1.9375958918),TRINITY_DN3032_c1_g3(-1.81290474391),TRINITY_DN3160_c3_g6(1.13017127252),TRINITY_DN3243_c2_g4(1.8219994837),TRINITY_DN3285_c2_g1(-1.58640393684),TRINITY_DN3327_c4_g1(-1.0711322481…
GO:0009117	nucleotide metabolic process	biological process	14/234	37/681	0.38409	1	TRINITY_DN1268_c0_g1(-2.06811775799),TRINITY_DN2378_c0_g1(-2.74436306224),TRINITY_DN2512_c2_g5(-3.78741905927),TRINITY_DN2638_c4_g1(-1.94308971346),TRINITY_DN2638_c4_g3(-1.69613457802),TRINITY_DN2822_c1_g3(1.9375958918),TRINITY_DN3032_c1_g3(-1.81290474391),TRINITY_DN3160_c3_g6(1.13017127252),TRINITY_DN3243_c2_g4(1.8219994837),TRINITY_DN3285_c2_g1(-1.58640393684),TRINITY_DN3327_c4_g1(-1.0711322481…	TRINITY_DN1268_c0_g1(-2.06811775799),TRINITY_DN2378_c0_g1(-2.74436306224),TRINITY_DN2512_c2_g5(-3.78741905927),TRINITY_DN2638_c4_g1(-1.94308971346),TRINITY_DN2638_c4_g3(-1.69613457802),TRINITY_DN2822_c1_g3(1.9375958918),TRINITY_DN3032_c1_g3(-1.81290474391),TRINITY_DN3160_c3_g6(1.13017127252),TRINITY_DN3243_c2_g4(1.8219994837),TRINITY_DN3285_c2_g1(-1.58640393684),TRINITY_DN3327_c4_g1(-1.0711322481…
GO:0034470	ncRNA processing	biological process	9/234	23/681	0.38735	1	TRINITY_DN2783_c2_g1(-1.66691697296),TRINITY_DN3002_c7_g7(1.15397086811),TRINITY_DN3039_c1_g2(-1.41066512147),TRINITY_DN3160_c3_g6(1.13017127252),TRINITY_DN3343_c1_g7(1.11505558557),TRINITY_DN3483_c3_g1(1.58625165776),TRINITY_DN3522_c0_g2(-1.86254793253),TRINITY_DN3602_c4_g2(-2.95532582631),TRINITY_DN3616_c2_g1(1.5574445161)	TRINITY_DN2783_c2_g1(-1.66691697296),TRINITY_DN3002_c7_g7(1.15397086811),TRINITY_DN3039_c1_g2(-1.41066512147),TRINITY_DN3160_c3_g6(1.13017127252),TRINITY_DN3343_c1_g7(1.11505558557),TRINITY_DN3483_c3_g1(1.58625165776),TRINITY_DN3522_c0_g2(-1.86254793253),TRINITY_DN3602_c4_g2(-2.95532582631),TRINITY_DN3616_c2_g1(1.5574445161)
GO:0000902	cell morphogenesis	biological process	5/234	12/681	0.39762	1	TRINITY_DN2767_c3_g3(-1.67248354228),TRINITY_DN2990_c3_g1(4.48637222765),TRINITY_DN3034_c3_g2(-2.78869539746),TRINITY_DN3324_c1_g1(-1.19910771168),TRINITY_DN3496_c4_g3(-1.18941672544)	TRINITY_DN2767_c3_g3(-1.67248354228),TRINITY_DN2990_c3_g1(4.48637222765),TRINITY_DN3034_c3_g2(-2.78869539746),TRINITY_DN3324_c1_g1(-1.19910771168),TRINITY_DN3496_c4_g3(-1.18941672544)
GO:0007420	brain development	biological process	5/234	12/681	0.39762	1	TRINITY_DN1551_c0_g1(-2.62773240149),TRINITY_DN2990_c3_g1(4.48637222765),TRINITY_DN3160_c3_g6(1.13017127252),TRINITY_DN3282_c0_g4(1.20593803666),TRINITY_DN483_c0_g1(-1.37439231237)	TRINITY_DN1551_c0_g1(-2.62773240149),TRINITY_DN2990_c3_g1(4.48637222765),TRINITY_DN3160_c3_g6(1.13017127252),TRINITY_DN3282_c0_g4(1.20593803666),TRINITY_DN483_c0_g1(-1.37439231237)
GO:0009611	response to wounding	biological process	5/234	12/681	0.39762	1	TRINITY_DN1494_c0_g1(-2.19265717403),TRINITY_DN2638_c4_g1(-1.94308971346),TRINITY_DN2638_c4_g3(-1.69613457802),TRINITY_DN3243_c2_g4(1.8219994837),TRINITY_DN886_c0_g1(3.44157379396)	TRINITY_DN1494_c0_g1(-2.19265717403),TRINITY_DN2638_c4_g1(-1.94308971346),TRINITY_DN2638_c4_g3(-1.69613457802),TRINITY_DN3243_c2_g4(1.8219994837),TRINITY_DN886_c0_g1(3.44157379396)
GO:0042391	regulation of membrane potential	biological process	5/234	12/681	0.39762	1	TRINITY_DN1357_c0_g1(-2.55339730538),TRINITY_DN2677_c1_g2(1.75084897723),TRINITY_DN2991_c1_g2(-1.38723740444),TRINITY_DN3130_c0_g1(-1.11371794823),TRINITY_DN3757_c3_g4(2.45866702157)	TRINITY_DN1357_c0_g1(-2.55339730538),TRINITY_DN2677_c1_g2(1.75084897723),TRINITY_DN2991_c1_g2(-1.38723740444),TRINITY_DN3130_c0_g1(-1.11371794823),TRINITY_DN3757_c3_g4(2.45866702157)
GO:0043069	negative regulation of programmed cell death	biological process	5/234	12/681	0.39762	1	TRINITY_DN1267_c0_g1(-3.74317437745),TRINITY_DN1551_c0_g1(-2.62773240149),TRINITY_DN2512_c2_g5(-3.78741905927),TRINITY_DN2990_c3_g1(4.48637222765),TRINITY_DN3587_c6_g1(-2.83540947981)	TRINITY_DN1267_c0_g1(-3.74317437745),TRINITY_DN1551_c0_g1(-2.62773240149),TRINITY_DN2512_c2_g5(-3.78741905927),TRINITY_DN2990_c3_g1(4.48637222765),TRINITY_DN3587_c6_g1(-2.83540947981)
GO:0043900	regulation of multi-organism process	biological process	5/234	12/681	0.39762	1	TRINITY_DN2948_c3_g2(-1.25152991183),TRINITY_DN3020_c4_g1(-1.1057580358),TRINITY_DN3324_c1_g1(-1.19910771168),TRINITY_DN3344_c2_g2(-1.07984282302),TRINITY_DN3416_c0_g3(-1.06697066005)	TRINITY_DN2948_c3_g2(-1.25152991183),TRINITY_DN3020_c4_g1(-1.1057580358),TRINITY_DN3324_c1_g1(-1.19910771168),TRINITY_DN3344_c2_g2(-1.07984282302),TRINITY_DN3416_c0_g3(-1.06697066005)
GO:0048443	stamen development	biological process	5/234	12/681	0.39762	1	TRINITY_DN2799_c7_g1(-1.47543719703),TRINITY_DN2942_c1_g5(-2.01094648508),TRINITY_DN2942_c1_g6(-2.98575187314),TRINITY_DN3328_c3_g3(-3.02560339128),TRINITY_DN3589_c6_g3(-1.72671706636)	TRINITY_DN2799_c7_g1(-1.47543719703),TRINITY_DN2942_c1_g5(-2.01094648508),TRINITY_DN2942_c1_g6(-2.98575187314),TRINITY_DN3328_c3_g3(-3.02560339128),TRINITY_DN3589_c6_g3(-1.72671706636)
GO:0048466	androecium development	biological process	5/234	12/681	0.39762	1	TRINITY_DN2799_c7_g1(-1.47543719703),TRINITY_DN2942_c1_g5(-2.01094648508),TRINITY_DN2942_c1_g6(-2.98575187314),TRINITY_DN3328_c3_g3(-3.02560339128),TRINITY_DN3589_c6_g3(-1.72671706636)	TRINITY_DN2799_c7_g1(-1.47543719703),TRINITY_DN2942_c1_g5(-2.01094648508),TRINITY_DN2942_c1_g6(-2.98575187314),TRINITY_DN3328_c3_g3(-3.02560339128),TRINITY_DN3589_c6_g3(-1.72671706636)
GO:0051223	regulation of protein transport	biological process	5/234	12/681	0.39762	1	TRINITY_DN1453_c0_g1(-2.82693098456),TRINITY_DN2618_c2_g3(1.16746035949),TRINITY_DN3512_c0_g2(-1.87901474245),TRINITY_DN3656_c1_g1(-2.08721167236),TRINITY_DN3656_c1_g5(-3.02684114829)	TRINITY_DN1453_c0_g1(-2.82693098456),TRINITY_DN2618_c2_g3(1.16746035949),TRINITY_DN3512_c0_g2(-1.87901474245),TRINITY_DN3656_c1_g1(-2.08721167236),TRINITY_DN3656_c1_g5(-3.02684114829)
GO:0060284	regulation of cell development	biological process	5/234	12/681	0.39762	1	TRINITY_DN2948_c3_g2(-1.25152991183),TRINITY_DN2990_c3_g1(4.48637222765),TRINITY_DN3324_c1_g1(-1.19910771168),TRINITY_DN3344_c2_g2(-1.07984282302),TRINITY_DN3416_c0_g3(-1.06697066005)	TRINITY_DN2948_c3_g2(-1.25152991183),TRINITY_DN2990_c3_g1(4.48637222765),TRINITY_DN3324_c1_g1(-1.19910771168),TRINITY_DN3344_c2_g2(-1.07984282302),TRINITY_DN3416_c0_g3(-1.06697066005)
GO:0060322	head development	biological process	5/234	12/681	0.39762	1	TRINITY_DN1551_c0_g1(-2.62773240149),TRINITY_DN2990_c3_g1(4.48637222765),TRINITY_DN3160_c3_g6(1.13017127252),TRINITY_DN3282_c0_g4(1.20593803666),TRINITY_DN483_c0_g1(-1.37439231237)	TRINITY_DN1551_c0_g1(-2.62773240149),TRINITY_DN2990_c3_g1(4.48637222765),TRINITY_DN3160_c3_g6(1.13017127252),TRINITY_DN3282_c0_g4(1.20593803666),TRINITY_DN483_c0_g1(-1.37439231237)
GO:0070201	regulation of establishment of protein localization	biological process	5/234	12/681	0.39762	1	TRINITY_DN1453_c0_g1(-2.82693098456),TRINITY_DN2618_c2_g3(1.16746035949),TRINITY_DN3512_c0_g2(-1.87901474245),TRINITY_DN3656_c1_g1(-2.08721167236),TRINITY_DN3656_c1_g5(-3.02684114829)	TRINITY_DN1453_c0_g1(-2.82693098456),TRINITY_DN2618_c2_g3(1.16746035949),TRINITY_DN3512_c0_g2(-1.87901474245),TRINITY_DN3656_c1_g1(-2.08721167236),TRINITY_DN3656_c1_g5(-3.02684114829)
GO:0071417	cellular response to organonitrogen compound	biological process	5/234	12/681	0.39762	1	TRINITY_DN1357_c0_g1(-2.55339730538),TRINITY_DN2677_c1_g2(1.75084897723),TRINITY_DN2991_c1_g2(-1.38723740444),TRINITY_DN3130_c0_g1(-1.11371794823),TRINITY_DN3757_c3_g4(2.45866702157)	TRINITY_DN1357_c0_g1(-2.55339730538),TRINITY_DN2677_c1_g2(1.75084897723),TRINITY_DN2991_c1_g2(-1.38723740444),TRINITY_DN3130_c0_g1(-1.11371794823),TRINITY_DN3757_c3_g4(2.45866702157)
GO:0090087	regulation of peptide transport	biological process	5/234	12/681	0.39762	1	TRINITY_DN1453_c0_g1(-2.82693098456),TRINITY_DN2618_c2_g3(1.16746035949),TRINITY_DN3512_c0_g2(-1.87901474245),TRINITY_DN3656_c1_g1(-2.08721167236),TRINITY_DN3656_c1_g5(-3.02684114829)	TRINITY_DN1453_c0_g1(-2.82693098456),TRINITY_DN2618_c2_g3(1.16746035949),TRINITY_DN3512_c0_g2(-1.87901474245),TRINITY_DN3656_c1_g1(-2.08721167236),TRINITY_DN3656_c1_g5(-3.02684114829)
[truncated: 2,153 more rows]
