# Supplementary material for: Physiological and transcriptomic responses of Chlorella vulgaris to novel antibacterial nanoparticles of ethyl cyanoacrylate polymer
Source: Royal Society of Chemistry journal article supplement (doi:10.1039/d4en00861h), 2025-01-01
Supplement: d4en00861h5.xlsx [file d4en00861h5.xlsx]

## Sheet: Sheet1
Gene id	Assembly Sequences (5´-3´)	MeanTPM (NPs1)	MeanTPM (Con1)	log2FoldChange	pValue	qValue	result	CDD	PFAM	KEGG	KOG	Swissprot	GO	NR	NT
TRINITY_DN2900_c3_g4	GTGTGTGTGTGTGTGTGTGTGTGTGTGTGTGTGTGTGTGGGGGGGGGGGGGTTGAAAGTC ACAAGAGCAAGGCCTCTGCCTGCGTAAGCACGCAGGACGTGGCAGCAGCCAAGAGCCTGC AACCTGGCCCTGCTTTCACACCCAGCCCTCTGGTGCACACAACATGACGCAGCACTGCCC GGCACCTTGCTGCGCGTCCCACCCGCAAACTGCTGAAGCTGCTCCACGTTGTCCCCCTCC CGCAGGAAGAAGGGGTGCACGTAGAGGGGGAAGGGGGCGCGGTTGCCCTCGTACGCGGCA TCAAAGTGTGCCTTCAGGATCTCCAGGGTGCTGTAGTTGCTTGCG	0.947912	128.479	-7.08257	9.26519e-49	4.27869e-48	down	-	-	-	-	-	GO:0003674, molecular_function;GO:0003824, catalytic activity;GO:0004099, chitin deacetylase activity;GO:0004553, hydrolase activity, hydrolyzing O-glycosyl compounds;GO:0004568, chitinase activity;GO:0005488, binding;GO:0006022, aminoglycan metabolic process;GO:0006026, aminoglycan catabolic process;GO:0006030, chitin metabolic process;GO:0006032, chitin catabolic process;GO:0006040, amino sugar…	PSC71479.1 polysaccharide deacetylase [Micractinium conductrix] 1.00e-10	-
TRINITY_DN1445_c0_g1	GTCGGATCACAGGCAGCTGTGGTGGACAGGTGGCAGCCGGCCAGGGGTCTCATGGGCCCA TCTAGGTGGAAATGGTGACCATGGCACGAAACATCATGAACATCCATGCCCCGCCTCGTG GCAGGCCTGCCCTGCTGCCTGGTGCGAGCTGCCTGCCGCGCGCGGCGCGCCCACCTTGCA CCCATCGGCCAGGTCGGCAAACATGCCCGAAGATCCCTTCCAGCCGCAGAAGCAGGCGGA ATCTCCAATGGTGCAGGGAGCGGTGGAAGGCTGGGCGGGCGGCATGGGGGGCGAGGGCGG CGCCGGCGGGGGGGAAGGCCGGGGCGAGGGCGGGGGTGGGCCAACCGGAGGCCGGGGCAA AGGAGGCGGCGACGGCGGGCGGGGCGGCGGGTT…	1.42503	12.4008	-3.12137	3.23539e-54	1.58795e-53	down	cd02872, GH18_chitolectin_chitotriosidase, This conserved domain family includes a large number of catalytically inactive chitinase-like lectins (chitolectins) including YKL-39, YKL-40 (HCGP39), YM1, oviductin, and AMCase (acidic mammalian chitinase), as well as catalytically active chitotriosidases. The conserved domain is an eight-stranded alpha/beta barrel fold belonging to the family 18 glyco…	pfam00704, Glyco_hydro_18, Glycosyl hydrolases family 18. 4.64e-50	K01183-ko00520 Amino sugar and nucleotide sugar metabolism	KOG2806, KOG2806, KOG2806, Chitinase [Carbohydrate transport and metabolism]. 2.36e-32	sp|Q13231|CHIT1_HUMAN Chitotriosidase-1 OS=Homo sapiens GN=CHIT1 PE=1 SV=1 1.61e-61	GO:0003674, molecular_function;GO:0003824, catalytic activity;GO:0004553, hydrolase activity, hydrolyzing O-glycosyl compounds;GO:0004568, chitinase activity;GO:0005488, binding;GO:0005575, cellular_component;GO:0005576, extracellular region;GO:0006022, aminoglycan metabolic process;GO:0006026, aminoglycan catabolic process;GO:0006030, chitin metabolic process;GO:0006032, chitin catabolic process…	PSC74045.1 Pyruvate dehydrogenase E1 component subunit alpha [Micractinium conductrix] 3.41e-183	Chlorella variabilis hypothetical protein (CHLNCDRAFT_17567) mRNA, partial cds 7.78e-21
TRINITY_DN3656_c1_g5	CTGCACTCTTCAGCTCAAGTATGCTCGTTGGCATGGCGACGCCGCTGCGGGCGGGTGCCG GCCGGCCCGGCCCGCAAGCCGCCGCGTTTCGGCGCTGGCCACACGCGTCAGCTCCTTTTG TGCAAGGCCATCCGGGAGCTCCGATGCAGGCTCGAGTCCTGCGGCAGGCGCAGAGGCGGC TGCCCGGTGGCGCCGGCGGCATTACTAGTAGGGTTGTCCGAGCGGCTGCAGCTGATCACA GCCCAGAGCAGCAGACGACTGGTTCGCTGCCCGGGCAGATGGGCTTCCCCGCTGGCATGC TGCTGGGTGGGCGCTACGAGGTCGTCGAGCGGTGGGGCCAAGGCGGCAGCGGCGTGGCCT ACCGCTGCAGGGACACTGCCGGGGGGCGGGACG…	21.3811	174.261	-3.02684	2.39675e-36	9.40644e-36	down	cd14014, STKc_PknB_like, Catalytic domain of bacterial Serine/Threonine kinases, PknB and similar proteins. STKs catalyze the transfer of the gamma-phosphoryl group from ATP to serine/threonine residues on protein substrates. This subfamily includes many bacterial eukaryotic-type STKs including Staphylococcus aureus PknB (also called PrkC or Stk1), Bacillus subtilis PrkC, and Mycobacterium tuberc…	-	-	KOG0595, KOG0595, KOG0595, Serine/threonine-protein kinase involved in autophagy [Posttranslational modification, protein turnover, chaperones, Intracellular trafficking, secretion, and vesicular transport, Signal transduction mechanisms]. 2.29e-07	-	GO:0000003, reproduction;GO:0000011, vacuole inheritance;GO:0000122, negative regulation of transcription by RNA polymerase II;GO:0000165, MAPK cascade;GO:0000166, nucleotide binding;GO:0000322, storage vacuole;GO:0000323, lytic vacuole;GO:0000324, fungal-type vacuole;GO:0000920, cell separation after cytokinesis;GO:0001410, chlamydospore formation;GO:0001932, regulation of protein phosphorylatio…	XP_005845299.1 hypothetical protein CHLNCDRAFT_32227, partial [Chlorella variabilis] >EFN53197.1 hypothetical protein CHLNCDRAFT_32227, partial [Chlorella variabilis] 2.88e-54	-
TRINITY_DN3709_c2_g1	TATATCAGTTGGATGGATTACCAATTTAATGGGCAAATGACATATGGCGGCAAGCTTGCA TCGGGTTGATCACCCCAGGAAGGATGCGACGCCTCTACAGCGGGCGCGTGATCCCAGGCG CGCGCAGCTGCACCCGCCTCAGCCAAGCCACCGAGCTCAAGCCTGCGCTGCAGCCTCCGT GCGCCCCTCCTCCTGCTGCAGCACGAACCGCTTGACATACTTGTCTTCATCCACAATGAA CACGACCTGCAAGGCAGGGAGGGAAGGCGCCGTGTGCTCCAAATCGTGTGCGCCTTCAGG GCCAGGGCCAGGGCCAGCAGGGCGCAACCCGAAGGGGCACACTGCTGTCTGCCTCTGGCC ATGGGCATAGGCGCAGAGCACGCGGCTGTGCGC…	9.30989	54.7752	-2.55669	0	0	down	cd14955, NHL_like_4, Uncharacterized NHL-repeat domain in bacterial and archaeal proteins. The NHL (NCL-1, HT2A and LIN-41) repeat is found in multiple tandem copies, typically as 6 instances. It is about 40 residues long and resembles the WD repeat and other beta-propeller structures. 1.14e-23	-	-	-	sp|A4IF63|TRIM2_BOVIN Tripartite motif-containing protein 2 OS=Bos taurus GN=TRIM2 PE=2 SV=1 4.99e-08	GO:0003674, molecular_function;GO:0003824, catalytic activity;GO:0004099, chitin deacetylase activity;GO:0004553, hydrolase activity, hydrolyzing O-glycosyl compounds;GO:0004568, chitinase activity;GO:0005488, binding;GO:0006022, aminoglycan metabolic process;GO:0006026, aminoglycan catabolic process;GO:0006030, chitin metabolic process;GO:0006032, chitin catabolic process;GO:0006040, amino sugar…	PSC76360.1 Polysaccharide deacetylase domain-containing [Micractinium conductrix] 1.14e-112	-
TRINITY_DN1357_c0_g1	GCGGGGTACGCTCGTTGCCACACTGCCGGTCAACTCGGTGGGACAACACATAATGACAAC GGAGAGTAACAGGCAGGGAAAACTGGCATGCCAAGCGGCGAGTTGAGTTCTGACAGCATG TTTGCGCGCGTCTGGCTGCCAGTTCAGCGCTGCAGCGCTGCCGCTGCGGCCTCTGCTGCC TCGCGGCGCTTGCGCAGCGCCAGCTGGGCATAGTACAGATTCTTGGGGCCCTCGATGGAC CGCTCGTAGTGCCACGTCTCGCACATGTGCCGCGCCTGTCGGCAGCGGGGAGCACAGCGG GGGTTTTGGGCGCGCTGAGAGGTGGCGCAGCCATGCAGGGCATGCCCAGCGCCGGCATGT CACACAGGAGCTGGCAGCCCACACAACCAACTA…	5.03769	29.572	-2.5534	4.74696e-121	3.83833e-120	down	-	-	-	-	-	GO:0000166, nucleotide binding;GO:0001508, action potential;GO:0003674, molecular_function;GO:0005198, structural molecule activity;GO:0005488, binding;GO:0005515, protein binding;GO:0005575, cellular_component;GO:0005622, intracellular;GO:0005623, cell;GO:0005634, nucleus;GO:0005737, cytoplasm;GO:0005783, endoplasmic reticulum;GO:0005829, cytosol;GO:0005886, plasma membrane;GO:0006810, transport…	PSC75060.1 band 7 [Micractinium conductrix] 2.13e-220	Chlorella variabilis hypothetical protein (CHLNCDRAFT_133036) mRNA, complete cds 7.80e-17
TRINITY_DN3105_c1_g2	GCCCCATCTTCCTTCACTCCCGGCTTGAAGATTTCGAGATGTATTTCACCAAACGTTGTT TGCAATGCTTGCCCAGGAGGTGCCGCTGCTTGAGCGGGCAGACGGCACGTTGGAAAGATT CCATGCAGGGATGGCGAATGGACTCGTAAGCGCTGCCAGGATGTGGCTGGCGCAGCAGCA TTGCTAAGGATGATAGAACGAATACGTTGATCAGAAATTCGAGGCATACGCAACAATCAG GCGCCAGGATGGCTGGCAGTCCCGGGCAGTGTGGGCTGTTTCGCCGCGGGGCGGCATCTG TAGCAATCAAGAATCCTAGGCGGGGAGTGGTAGGAGTGTGCACTCAGGGAGGGGCCCTCC CCCTCGAGAGGAACACTGAGCAGGCAGCACAAC…	144.281	831.895	-2.52752	0	0	down	cd10919, CE4_CDA_like, Putative catalytic domain of chitin deacetylase-like proteins from insects and similar proteins. Chitin deacetylases (CDAs, EC 3.5.1.41) are secreted metalloproteins belonging to a family of extracellular chitin-modifying enzymes that catalyze the N-deacetylation of chitin, a beta-1,4-linked N-acetylglucosamine polymer, to form chitosan, a polymer of beta-(1,4)-linked d-glu…	pfam01522, Polysacc_deac_1, Polysaccharide deacetylase. This domain is found in polysaccharide deacetylase. This family of polysaccharide deacetylases includes NodB (nodulation protein B from Rhizobium) which is a chitooligosaccharide deacetylase. It also includes chitin deacetylase from yeast, and endoxylanases which hydrolyzes glucosidic bonds in xylan. 7.77e-06	-	-	-	GO:0003674, molecular_function;GO:0003824, catalytic activity;GO:0004099, chitin deacetylase activity;GO:0004553, hydrolase activity, hydrolyzing O-glycosyl compounds;GO:0004568, chitinase activity;GO:0005488, binding;GO:0006022, aminoglycan metabolic process;GO:0006026, aminoglycan catabolic process;GO:0006030, chitin metabolic process;GO:0006032, chitin catabolic process;GO:0006040, amino sugar…	KAI7845751.1 hypothetical protein COHA_000666 [Chlorella ohadii] 3.64e-105	Chlorella variabilis hypothetical protein (CHLNCDRAFT_139978) mRNA, complete cds 1.19e-13
TRINITY_DN3733_c1_g3	GGCTGTGGGCCTGGGCTGTGCGAAGGAGAGCGTGGGCACACGCCTCGGGCGGGCCGGGGC GTGCTCGGGGTTGGCGGTGGTGGGCAGGGGGGGGGCGCGGCGGCGCCGAGCGCGGGGCCA GCCCACAAAGCAGGGAGGGAGGCTGCCCGGAAGCGTGGGAGGTTGGCAGCAGTTGGAAGG TATTCTCTTGTCTAATTATCCAAGAGCGTGGCAACAGTCCAGAGAGCTGTGGCGGCGGCG AGGCGTACCTCCAGCGGGATGCCGCAGGTCTCGTTCAAGAAGGCGCGGGCGGAGAACATC TCGTCACGCATCTTGCTTGGGCCGCCTGGGAAGGGGTCCACCAGCGGCAGGTGCGTCTTG CTATGGATGGCAATCTGCACGCCAGCAGAGCGG…	0.970745	5.23102	-2.42993	2.45644e-06	5.16892e-06	down	-	-	-	-	-	GO:0003674, molecular_function;GO:0003824, catalytic activity;GO:0004553, hydrolase activity, hydrolyzing O-glycosyl compounds;GO:0004568, chitinase activity;GO:0005488, binding;GO:0005575, cellular_component;GO:0005576, extracellular region;GO:0006022, aminoglycan metabolic process;GO:0006026, aminoglycan catabolic process;GO:0006030, chitin metabolic process;GO:0006032, chitin catabolic process…	XP_005849744.1 hypothetical protein CHLNCDRAFT_142762 [Chlorella variabilis] >EFN57642.1 hypothetical protein CHLNCDRAFT_142762 [Chlorella variabilis] 1.32e-10	-
TRINITY_DN2507_c1_g1	CTTGCGTGCTAAGCTTCGAACAGATCTTTCAGCATCATGGCGAACCAGAATGGGCACAAT GGCACCGGCCTAAGCAACGCTGACAGGGCATTCCAGGCCCTGAAGAACGTCACCCCAAAG CTGCTGATCAACGGCAAGTTTGTGGATGCCAAGAGCGGCAAGACGTTTGAAAATCTTGAC CCCCGCACCGGCGAGAAGCTGGTCGATGTGGCAGAGGCGCAGGCAGAGGATGTGGACCGA GCTGTGCGGGTGGCCAAGCAGGCGTTCGACGAGGGGCCGTGGCCGCGCATGACGGGCGAG CAGCGCGCCCGTGTGCTGCTGCGCCTGGCAGACCTTGTGGAGGAGCACGCGGATGAGCTG GCGCTGCTGGAAACCCTGGACAACGGCAAGACG…	7.60261	40.74	-2.42188	6.61416e-211	8.29424e-210	down	cd07142, ALDH_F2BC, Arabidosis aldehyde dehydrogenase family 2 B4, B7, C4-like. Included in this CD is the Arabidosis aldehyde dehydrogenase family 2 members B4 and B7 (EC=1.2.1.3), which are mitochondrial homotetramers that oxidize acetaldehyde and glycolaldehyde, but not L-lactaldehyde. Also in this group, is the Arabidosis cytosolic, homotetramer ALDH2C4 (EC=1.2.1.3), an enzyme involved in the…	pfam00171, Aldedh, Aldehyde dehydrogenase family. This family of dehydrogenases act on aldehyde substrates. Members use NADP as a cofactor. The family includes the following members: The prototypical members are the aldehyde dehydrogenases EC:1.2.1.3. Succinate-semialdehyde dehydrogenase EC:1.2.1.16. Lactaldehyde dehydrogenase EC:1.2.1.22. Benzaldehyde dehydrogenase EC:1.2.1.28. Methylmalonate-se…	K00128-ko00903 Limonene and pinene degradation;ko00330 Arginine and proline metabolism;ko00280 Valine, leucine and isoleucine degradation;ko00310 Lysine degradation;ko00625 Chloroalkane and chloroalkene degradation;ko00561 Glycerolipid metabolism;ko00620 Pyruvate metabolism;ko00410 beta-Alanine metabolism;ko00040 Pentose and glucuronate interconversions;ko00071 Fatty acid degradation;ko00380 Tryp…	KOG2450, KOG2450, KOG2450, Aldehyde dehydrogenase [Energy production and conversion]. 1.33e-161	sp|Q9SU63|AL2B4_ARATH Aldehyde dehydrogenase family 2 member B4, mitochondrial OS=Arabidopsis thaliana GN=ALDH2B4 PE=2 SV=1 2.70e-167	GO:0000166, nucleotide binding;GO:0003674, molecular_function;GO:0003824, catalytic activity;GO:0004029, aldehyde dehydrogenase (NAD) activity;GO:0005488, binding;GO:0005524, ATP binding;GO:0005575, cellular_component;GO:0005622, intracellular;GO:0005623, cell;GO:0005737, cytoplasm;GO:0005739, mitochondrion;GO:0008144, drug binding;GO:0008150, biological_process;GO:0008152, metabolic process;GO:0…	KAI3436841.1 hypothetical protein D9Q98_006251 [Chlorella vulgaris] 4.62e-305	Chlorella variabilis hypothetical protein (CHLNCDRAFT_50233) mRNA, complete cds 3.90e-12
TRINITY_DN3688_c1_g7	GTTGGCAGTATCCGACCATGGCGACTCACTTGGAGGGACTTGAGGACAAGAAAGTCAGGC CTCTCAGCGAGGCCGACGTCAAGCTGCTGAACTCGTACCTAGCAGGGCCGTATGCCTCAC ATATCGCCCAGCTGGAGGATGACATCAAGGCGCTGAACAAGAAGGTGCACGACACTGCCT GCATTCATGAGCAGGGCACGGGGCTGGCACCCCAGACCCGCTGGGACCTCGCTGCAGACA GGCAGGCGCTGCAAGAGGAGCAGTCACTGCAGGTGGTCAAGTGCACCACGCGGCTGGACG GGGATGAGGAGCACCCGCGGTACGTGATTGAGATGCCGCGGCAAGGCAAGGCAAGCCGTT CATGGAGTGCGGGTAGCAGGGGAGCAGGCGTGG…	4.59251	24.0121	-2.3864	6.24724e-73	3.6289e-72	down	cd19502, RecA-like_PAN_like, proteasome activating nucleotidase PAN and related proteasome subunits. This subfamily contains ATPase subunits of the eukaryotic 26S proteasome, and of the archaeal proteasome which carry out ATP-dependent degradation of substrates of the ubiquitin-proteasome pathway. The eukaryotic 26S proteasome consists of a proteolytic 20S core particle (CP), and a 19S regulatory…	pfam00004, AAA, ATPase family associated with various cellular activities (AAA). AAA family proteins often perform chaperone-like functions that assist in the assembly, operation, or disassembly of protein complexes. 1.67e-08	K03061-ko03050 Proteasome	KOG0729, KOG0729, KOG0729, 26S proteasome regulatory complex, ATPase RPT1 [Posttranslational modification, protein turnover, chaperones]. 6.70e-25	sp|Q41365|PRS7_SPIOL 26S protease regulatory subunit 7 OS=Spinacia oleracea GN=RPT1 PE=2 SV=1 1.49e-19	GO:0000166, nucleotide binding;GO:0000502, proteasome complex;GO:0003674, molecular_function;GO:0003824, catalytic activity;GO:0004175, endopeptidase activity;GO:0005488, binding;GO:0005515, protein binding;GO:0005524, ATP binding;GO:0005575, cellular_component;GO:0005622, intracellular;GO:0005623, cell;GO:0005634, nucleus;GO:0005737, cytoplasm;GO:0005829, cytosol;GO:0005838, proteasome regulator…	PRW57317.1 26S protease regulatory subunit 7 [Chlorella sorokiniana] 1.27e-82	-
TRINITY_DN2783_c0_g1	GTTGGTATGGCCTTCACATTGGAACTGTCCTGTGGTACCCAGCAATCAATCTGACATGCA GTTGTTTGCAGCAAGCAGTATGCTGAGGCTCATGGTGGGACATGCAATCCTATGCTTGCA TCGCTATGTCGGTTCATGAGCCGGCTTTGTGGGCCGGCCGTCTGTGCAAAAGATGGAGCA CTGGCTGCCCGCTGCAGCCGTCACATCTGCCCGGAACGCGGGTCGCCCATCCCCTCCCTG CGGGGGTCCCCCATGGCCCCACCAGCAGCCAGCCCGCCAGTCATCGCTTCTGTGGTCCCG CCGCTGCCTCCTCCGCGTGCGGCGGTGCCCGCGTCATAGCCGGCCTTGTTGTCGGTGGTG CGGCGGTACGCCTCGCCGGCGGTGCCATGTGTC…	124.079	602.38	-2.27942	0	0	down	cd10919, CE4_CDA_like, Putative catalytic domain of chitin deacetylase-like proteins from insects and similar proteins. Chitin deacetylases (CDAs, EC 3.5.1.41) are secreted metalloproteins belonging to a family of extracellular chitin-modifying enzymes that catalyze the N-deacetylation of chitin, a beta-1,4-linked N-acetylglucosamine polymer, to form chitosan, a polymer of beta-(1,4)-linked d-glu…	-	-	-	-	GO:0003674, molecular_function;GO:0003824, catalytic activity;GO:0004553, hydrolase activity, hydrolyzing O-glycosyl compounds;GO:0004568, chitinase activity;GO:0005488, binding;GO:0005575, cellular_component;GO:0005576, extracellular region;GO:0006022, aminoglycan metabolic process;GO:0006026, aminoglycan catabolic process;GO:0006030, chitin metabolic process;GO:0006032, chitin catabolic process…	PSC75681.1 hypothetical protein C2E20_1310 [Micractinium conductrix] 1.31e-204	Chlorella sorokiniana strain SLA-04 chromosome 2 2.49e-23
TRINITY_DN3733_c1_g2	TGTTGACACAGATATGGTCCAGGGCATTTTATTGAAGGGCGTGGGATGAGTTGTGGGGCA GAGGTTGGGAGGGAAAAATGAGGGGCCTTGCCCTGTTGCGGGGGGCAGCGCACGGGCAAG CTCAAAGAATTCGGGGTGGGGGCAGGCAATGAGGAGGAGGAGGGAGGGAGGAATCAAGGC ATGGCAGGGGGAGCGCATCCAATGAAATCATTTGTTCAGTCGTGAGCACAGTTGAGTTGG CGGGGACCTTTTTCTGCAGCTCTGGCAGCCCCGAGCCTGCTGCACTCCAGAAATCTTGCT ACGGTGCAACGCAGGGGCAGGCAAGACGGTGGGCTGTGGCCAGAGCCGACAGGAACTTGC TATCCTGCGGGGCCCGCTCAGGCCGGGCCCGCG…	78.5083	341.726	-2.12192	0	0	down	cd10919, CE4_CDA_like, Putative catalytic domain of chitin deacetylase-like proteins from insects and similar proteins. Chitin deacetylases (CDAs, EC 3.5.1.41) are secreted metalloproteins belonging to a family of extracellular chitin-modifying enzymes that catalyze the N-deacetylation of chitin, a beta-1,4-linked N-acetylglucosamine polymer, to form chitosan, a polymer of beta-(1,4)-linked d-glu…	-	-	-	-	GO:0003674, molecular_function;GO:0003824, catalytic activity;GO:0004553, hydrolase activity, hydrolyzing O-glycosyl compounds;GO:0004568, chitinase activity;GO:0005488, binding;GO:0005575, cellular_component;GO:0005576, extracellular region;GO:0006022, aminoglycan metabolic process;GO:0006026, aminoglycan catabolic process;GO:0006030, chitin metabolic process;GO:0006032, chitin catabolic process…	KAI3438445.1 hypothetical protein D9Q98_000875 [Chlorella vulgaris] 3.58e-107	Chlorella variabilis hypothetical protein (CHLNCDRAFT_142762) mRNA, complete cds 3.79e-75
TRINITY_DN1427_c0_g1	TGCACCCGTCGATGCATATGTTACAAACTTGCATTAGACATGCGACATGAGGCCCTGCCT GGGTTGCAGAGCCACAGTCATGCCACAGGAGCGCAGCGGCTGGCCACGCGCCACAGGCTG GCAACAAGAGGGCACACTCACCAGACCAACCTCGGCGCAGCACGAATGCGGCCGGCCAGC AAACGGTCACACGCGTGATGCACAGTGCCTGCATCCTGCGGCGTCACGGCGAGGGCAGCA GCATGCCCAGCGCCACGCCCGTGTCCTCGCTGTCGTTGCCACTGCTGGGGCCGCCGGCGG AGGCCGGGGGCTGCGGCTCCAGGTCAAGATAAGTGAGCTGCAGCTTGACGTTGTGCCCTG CAAAGTTGACCGACATGCCCTCCACCATTTCAT…	9.53829	40.7783	-2.096	4.08711e-73	2.3796e-72	down	-	-	-	-	-	GO:0003674, molecular_function;GO:0003824, catalytic activity;GO:0004099, chitin deacetylase activity;GO:0004553, hydrolase activity, hydrolyzing O-glycosyl compounds;GO:0004568, chitinase activity;GO:0005488, binding;GO:0006022, aminoglycan metabolic process;GO:0006026, aminoglycan catabolic process;GO:0006030, chitin metabolic process;GO:0006032, chitin catabolic process;GO:0006040, amino sugar…	XP_005843698.1 hypothetical protein CHLNCDRAFT_139978 [Chlorella variabilis] >EFN51596.1 hypothetical protein CHLNCDRAFT_139978 [Chlorella variabilis] 1.81e-46	-
TRINITY_DN3656_c1_g1	AAGGTCAATTCAACTTGAATTTCAAGTCCGCAGTTTGCAAAGAGCAGCCACAGCGCAGCG CGCCATGTCAGCAACCTGGCTTGTTTCATGGGCGGCCATCTTGCACTTCACCTTCACACA GTCGTTTTAGTACAGAAAAGGATCTCAAAGACATGGGTGCACCGCTGCTGACCGCCGGCG GCCGAGCCGCCGCCTTCCAGCGACGGCCAGGCGCATTTTGGCCGTTTTTGCATCGCTTTT CAGGCGCTCCAATGCAGCCTCGCATCCTGCGGCAGGCGCAGAAGAGGCTGCCTGGCGGTG CAGCCGACGCTAGGGTTGTTCGAGCGGTGGCAGCACCGAGCCCAGAGCAGCGGCCGGCTA GCGCACTGCCTGGGCAAATAGGTGACTGATGCT…	21.3047	90.5293	-2.08721	1.03059e-144	9.39549e-144	down	cd14002, STKc_STK36, Catalytic domain of Serine/Threonine Kinase 36. STKs catalyze the transfer of the gamma-phosphoryl group from ATP to serine/threonine residues on protein substrates. STK36, also called Fused (or Fu) kinase, is involved in the Hedgehog signaling pathway. It is activated by the Smoothened (SMO) signal transducer, resulting in the stabilization of GLI transcription factors and t…	-	-	KOG0595, KOG0595, KOG0595, Serine/threonine-protein kinase involved in autophagy [Posttranslational modification, protein turnover, chaperones, Intracellular trafficking, secretion, and vesicular transport, Signal transduction mechanisms]. 1.80e-17	sp|P27466|KCC1_YEAST Calcium/calmodulin-dependent protein kinase I OS=Saccharomyces cerevisiae (strain ATCC 204508 / S288c) GN=CMK1 PE=1 SV=2 9.91e-17	GO:0000003, reproduction;GO:0000011, vacuole inheritance;GO:0000122, negative regulation of transcription by RNA polymerase II;GO:0000165, MAPK cascade;GO:0000166, nucleotide binding;GO:0000322, storage vacuole;GO:0000323, lytic vacuole;GO:0000324, fungal-type vacuole;GO:0000920, cell separation after cytokinesis;GO:0001410, chlamydospore formation;GO:0001932, regulation of protein phosphorylatio…	XP_005845299.1 hypothetical protein CHLNCDRAFT_32227, partial [Chlorella variabilis] >EFN53197.1 hypothetical protein CHLNCDRAFT_32227, partial [Chlorella variabilis] 1.36e-65	-
TRINITY_DN3586_c0_g2	GCGTGGCACATGCAGGCGTAGCTAAAGCCTGGATCCATGTGGAAGGGCCCATCCAGCTCG CCCATGCTCCACAGCGGCACCTCCCACAGCCCCGGGTACGTCTCGCCGGGCTCGCAAGCC TGGCGCTGCGTGCCGTACGGCCCGTCCTCCGTGGTGCAGTTCATAGGGATGCCGTCGGCC ATGTCAAAGGGCCACAGGCGGTCGGCAAACCCCTGGGAGACGGAGCCGCCCAGGGTGTCC TCCACCAGGGAGCTGTCGTACAGGAAGCCGCTGGCAGCCAGCACCTCCCTCACGGCCGGG TCCACGTCCAGGTAGGGCGCCCGGAACCCCACAATGTCCCCGGCCGGCACGCCGCAGTCG GCCAGCTGGGCGCGGCCGTCCACGACCTCGCCC…	27.3026	110.375	-2.01531	2.89993e-161	2.87358e-160	down	cd10919, CE4_CDA_like, Putative catalytic domain of chitin deacetylase-like proteins from insects and similar proteins. Chitin deacetylases (CDAs, EC 3.5.1.41) are secreted metalloproteins belonging to a family of extracellular chitin-modifying enzymes that catalyze the N-deacetylation of chitin, a beta-1,4-linked N-acetylglucosamine polymer, to form chitosan, a polymer of beta-(1,4)-linked d-glu…	-	-	-	-	GO:0003674, molecular_function;GO:0003824, catalytic activity;GO:0004099, chitin deacetylase activity;GO:0004553, hydrolase activity, hydrolyzing O-glycosyl compounds;GO:0004568, chitinase activity;GO:0005488, binding;GO:0006022, aminoglycan metabolic process;GO:0006026, aminoglycan catabolic process;GO:0006030, chitin metabolic process;GO:0006032, chitin catabolic process;GO:0006040, amino sugar…	PSC71479.1 polysaccharide deacetylase [Micractinium conductrix] 8.03e-59	-
TRINITY_DN3345_c3_g2	GCGGAGTGGAGGACCCTCCAGGCGGCTCCAAATCAAGCACGTGCGAAGGCAGCGGTCAGG GTTGCAGCTGCTCCCGCTCTTCCAGCAGTTGCATCTGCAATTCAGCCCGCATGCACTGCC CAGTGTTGCAGGGTGTACGGCGCAGCAAGGGGCGACCAGCGGCGTACCCGCCTGTCTCCC ATTGCACTGGCGGCAGCCGCAGGCAGAGGCTGCATTCACCACCTGCCCCACCCACGGGCT GGGCTTGGTGCACGGAAGGGAGCCTGCTGCGCTGGCCAGGCTGCGAGCGGGCGCAAGCGA TGAGGAGATGCAGCGCCTGCTTGCCTCCTGCAAAGCCTGATGCATGCCGCAGGTCTGCGT TTCCAAGTCAATGAAGATACATGTGGTCATTAA…	22.5095	89.7823	-1.9959	0	0	down	cd03679, MM_CoA_mutase_alpha_like, Coenzyme B12-dependent-methylmalonyl coenzyme A (CoA) mutase (MCM) family, Alpha subunit-like subfamily; contains proteins similar to the alpha subunit of Propionbacterium shermanni MCM, as well as human and E. coli MCM. Members of this subfamily contain an N-terminal MCM domain and a C-terminal coenzyme B12 binding domain. MCM catalyzes the isomerization of met…	pfam01642, MM_CoA_mutase, Methylmalonyl-CoA mutase. The enzyme methylmalonyl-CoA mutase is a member of a class of enzymes that uses coenzyme B12 (adenosylcobalamin) as a cofactor. The enzyme induces the formation of an adenosyl radical from the cofactor. This radical then initiates a free-radical rearrangement of its substrate, succinyl-CoA, to methylmalonyl-CoA. 0.0	K01847-ko00640 Propanoate metabolism;ko01200 Carbon metabolism;ko00720 Carbon fixation pathways in prokaryotes;ko00630 Glyoxylate and dicarboxylate metabolism;ko00280 Valine, leucine and isoleucine degradation	-	sp|P16332|MUTA_MOUSE Methylmalonyl-CoA mutase, mitochondrial OS=Mus musculus GN=Mut PE=1 SV=2 0.0	GO:0000096, sulfur amino acid metabolic process;GO:0003674, molecular_function;GO:0003824, catalytic activity;GO:0003924, GTPase activity;GO:0004494, methylmalonyl-CoA mutase activity;GO:0005488, binding;GO:0005515, protein binding;GO:0005575, cellular_component;GO:0005622, intracellular;GO:0005623, cell;GO:0005737, cytoplasm;GO:0005739, mitochondrion;GO:0005759, mitochondrial matrix;GO:0006082, …	PRW60588.1 Methylmalonyl- mitochondrial [Chlorella sorokiniana] 0.0	Chlorella variabilis hypothetical protein (CHLNCDRAFT_18280) mRNA, complete cds 0.0
TRINITY_DN2834_c2_g1	TGACTGATAGTGCAGGCCCCGCCTGTCTCTAAGTACAGAACGTTTCACATAACAAAGAAG ATGTATTCACGTGAATACTAGTAGATTTCTGTGCTGCTGCTCAGCTCACAGCTCCCCTGC ACTGAGAGCAGCCGCTACTTCTGCCTGCAGCCCCAGCAGCTTGCAAGCCGCTCCGGGCGC GCCCATGAGCACAGCCTGCACTGCCGCGCGCACCGCTGCCAGAGCCTCTCGCCGCTCACT TGTGATGCCGCAATCAGGCGCCTGTGCTTGCAAGTTTGTCTCGTATGCTGCCTGCTGCTG TCGCACGCGGCGCTGCCGTTTGGCTGCCGGCTGGCCAGGGGACGGCTGGTTTGCAGGCTG CAAAGGCGGGCAGGCTGCGCTGCCAGCAGCTGC…	0.243335	0.896757	-1.88177	6.33683e-09	1.45918e-08	down	cd03286, ABC_MSH6_euk, ATP-binding cassette domain of eukaryotic MutS6 homolog. The MutS protein initiates DNA mismatch repair by recognizing mispaired and unpaired bases embedded in duplex DNA and activating endo- and exonucleases to remove the mismatch. Members of the MutS family possess C-terminal domain with a conserved ATPase activity that belongs to the ATP binding cassette (ABC) superfamil…	pfam00488, MutS_V, MutS domain V. This domain is found in proteins of the MutS family (DNA mismatch repair proteins) and is found associated with pfam01624, pfam05188, pfam05192 and pfam05190. The mutS family of proteins is named after the Salmonella typhimurium MutS protein involved in mismatch repair; other members of the family included the eukaryotic MSH 1,2,3, 4,5 and 6 proteins. These have …	K08737-ko03430 Mismatch repair	KOG0217, KOG0217, KOG0217, Mismatch repair ATPase MSH6 (MutS family) [Replication, recombination and repair]. 6.79e-23	sp|Q55GU9|MSH6_DICDI DNA mismatch repair protein Msh6 OS=Dictyostelium discoideum GN=msh6 PE=3 SV=1 5.10e-30	GO:0000003, reproduction;GO:0000166, nucleotide binding;GO:0000217, DNA secondary structure binding;GO:0000400, four-way junction DNA binding;GO:0000403, Y-form DNA binding;GO:0000404, heteroduplex DNA loop binding;GO:0000406, double-strand/single-strand DNA junction binding;GO:0000710, meiotic mismatch repair;GO:0003674, molecular_function;GO:0003676, nucleic acid binding;GO:0003677, DNA binding…	KAI7844585.1 hypothetical protein COHA_001825 [Chlorella ohadii] 0.0	-
TRINITY_DN3512_c0_g2	GCAGGACACGGAGCGGGACCGCGTCTTCTTTCTGGTTCAGGAGGCCGTCAAGGGTTCCTC GCTGGCGGCCATGGCTGGATCCGGCTGGCGCCCCGACGAGGCAGAGGTCGAACGCATCGC GACACAGCTGTTGGGCACGCTATGCTACCTGGGCAGCCGCCAGCCGCCCGTGGTCCACAG GGATGTGAAGCCCGAGAACGTTGTGGTGGATGGCGGCAGGAGTGGCGGCAAGGTGTATCT GGTGGACTTTGGCAGCGTGCAGGCTGCTGCCGCAGCCAGTGATGACCCCGCCAGCGGCGC CACAGTGGTGGGCACTTTTGGCTTCATGGCGCCGGAGCAGCTCCGCGGGGAGGCCACGCC CGCCAGTGACCTGTACAGCCTGGGCGCCACCCT…	18.43	67.7901	-1.87901	5.7082e-96	3.94809e-95	down	cd14002, STKc_STK36, Catalytic domain of Serine/Threonine Kinase 36. STKs catalyze the transfer of the gamma-phosphoryl group from ATP to serine/threonine residues on protein substrates. STK36, also called Fused (or Fu) kinase, is involved in the Hedgehog signaling pathway. It is activated by the Smoothened (SMO) signal transducer, resulting in the stabilization of GLI transcription factors and t…	-	-	KOG0198, KOG0198, KOG0198, MEKK and related serine/threonine protein kinases [Signal transduction mechanisms]. 4.82e-14	sp|P73469|SPKF_SYNY3 Serine/threonine-protein kinase F OS=Synechocystis sp. (strain PCC 6803 / Kazusa) GN=spkF PE=1 SV=1 8.24e-19	GO:0000003, reproduction;GO:0000011, vacuole inheritance;GO:0000122, negative regulation of transcription by RNA polymerase II;GO:0000165, MAPK cascade;GO:0000166, nucleotide binding;GO:0000322, storage vacuole;GO:0000323, lytic vacuole;GO:0000324, fungal-type vacuole;GO:0000920, cell separation after cytokinesis;GO:0001410, chlamydospore formation;GO:0001932, regulation of protein phosphorylatio…	PRW59623.1 serine threonine kinase [Chlorella sorokiniana] 5.29e-91	-
TRINITY_DN3355_c2_g2	GGGTTTTACATGTAAGAAACCAGCAGAAGATCGACCGGCAAGCAGGCTAGACGAGCCTGC ATTCAGGCAGGGATGTCCCTTTCCGGAACCCTGGCGGCGGGGGTGAGTTGGGTGAATGTG CGACAGGATGCAGAAAATAATCTGGTGAAAGATGATAGGACAGCTCGACAGGAGCGCCCT GCCATTGAGTGTTGATGCTTGGGAGGGCAGCAGCGCTGGCACAGTCAAGGCACATTGCGC AAGGAGAAGGGAATGAGAGAAGGCAGCAGGGCAGTGGTGAAATGTGTTTGATGGGAGGCT TTCAACAAGTGGCCTCAGAAGGACCATTCTAAAGGCTGTGGATGTCAAACACACAGGTTG GGAAAAAGATTAAACGGCATGCAGTGTAGTAGG…	0.629868	2.25374	-1.8392	0.000259195	0.000494358	down	cd14147, STKc_MLK3, Catalytic domain of the Serine/Threonine Kinase, Mixed Lineage Kinase 3. STKs catalyze the transfer of the gamma-phosphoryl group from ATP to serine/threonine residues on protein substrates. MLK3 is a mitogen-activated protein kinase kinase kinases (MAP3K, MKKK, MAPKKK), which phosphorylates and activates MAPK kinases (MAPKKs or MKKs or MAP2Ks), which in turn phosphorylate and…	pfam07714, Pkinase_Tyr, Protein tyrosine kinase. 1.69e-10	-	KOG0192, KOG0192, KOG0192, Tyrosine kinase specific for activated (GTP-bound) p21cdc42Hs [Signal transduction mechanisms]. 2.88e-12	sp|Q66HA1|M3K11_RAT Mitogen-activated protein kinase kinase kinase 11 OS=Rattus norvegicus GN=Map3k11 PE=1 SV=1 8.98e-10	GO:0000075, cell cycle checkpoint;GO:0000077, DNA damage checkpoint;GO:0000165, MAPK cascade;GO:0000166, nucleotide binding;GO:0000186, activation of MAPKK activity;GO:0000187, activation of MAPK activity;GO:0000278, mitotic cell cycle;GO:0000287, magnesium ion binding;GO:0001932, regulation of protein phosphorylation;GO:0001934, positive regulation of protein phosphorylation;GO:0003674, molecula…	KAI3432746.1 hypothetical protein D9Q98_004287 [Chlorella vulgaris] 4.37e-23	-
TRINITY_DN3590_c2_g1	CGCCGATCGCGCCTTCTGATTGCCGGCAAAGCCGGCCGCACGCTTGTCTGGCTCCTTGCA GCGGGCCAAGACTGTTTGCAGTTGGGGAGTCGGCCTCCGCGAGAATGGCGCGGTTTGCGC TCCTTCAAACACTTGTCGTGGGACTTGTGTGCACAACACAAGGCTCCATCCTGCCATCCT GGTACAGCTGTGACTGCAGCACCCGTGACAACTGCGCCTGCCCCACGACCAAGCCGCCGG GGGGCCTGGCGCCAGAGGACACTCCGCAGTTCATCCTGTTCACCCACGATGATGCCATCC TCGAGCTGACAGACCGCTCCTTCCGGGATGTGTGTGACGACCGCCAGAACCCCGACGGCT GCCCCTTCCGAGCCACCATGTTCACCCAGGCTG…	9.77039	30.2469	-1.6303	8.32872e-84	5.30331e-83	down	cd10919, CE4_CDA_like, Putative catalytic domain of chitin deacetylase-like proteins from insects and similar proteins. Chitin deacetylases (CDAs, EC 3.5.1.41) are secreted metalloproteins belonging to a family of extracellular chitin-modifying enzymes that catalyze the N-deacetylation of chitin, a beta-1,4-linked N-acetylglucosamine polymer, to form chitosan, a polymer of beta-(1,4)-linked d-glu…	-	-	-	-	GO:0003674, molecular_function;GO:0003824, catalytic activity;GO:0004553, hydrolase activity, hydrolyzing O-glycosyl compounds;GO:0004568, chitinase activity;GO:0005488, binding;GO:0005575, cellular_component;GO:0005576, extracellular region;GO:0006022, aminoglycan metabolic process;GO:0006026, aminoglycan catabolic process;GO:0006030, chitin metabolic process;GO:0006032, chitin catabolic process…	PSC74519.1 Myb-related B isoform A [Micractinium conductrix] 8.00e-207	-
TRINITY_DN3733_c1_g5	TCTCCGCCTGCGTGTTGAGCAGCGGGAACTCCCAGAGGCCGGGGTAGCGCTCCTGCTGGG TGCAGCTGTCGCCGGCAAAGTAGGCACAGTCCTGCGAGCCAAGCAAGGGGGGGGAGGCAG CGCTCGCGCCTCGGCAAGGAGATGGCGGCAGTGCGCGGCAGTATGCGGCCGGGGCGCCAG CGCCACACACGCCGCCCAGCCTGCCCAACCCGCCGGGCGTGCAGAGCAGCCAGCGCACCG GTGGGTTTCCGCTGCCCATACTGCGGGCCACCCGCGCTCCGGGTCGAACTGGCATGCATC TTGCATGCATCTGGTAAGGCCCACGCAGCCTGGCGCAAGGCGGCTGCACGCCGCGGGGTC CCCCCAAGCTACCCAACCCCCCTTCCCCGGAAA…	1.74409	5.3616	-1.62019	0.0141038	0.0237376	down	-	-	-	-	-	GO:0003674, molecular_function;GO:0003824, catalytic activity;GO:0004553, hydrolase activity, hydrolyzing O-glycosyl compounds;GO:0004568, chitinase activity;GO:0005488, binding;GO:0005575, cellular_component;GO:0005576, extracellular region;GO:0006022, aminoglycan metabolic process;GO:0006026, aminoglycan catabolic process;GO:0006030, chitin metabolic process;GO:0006032, chitin catabolic process…	XP_005849744.1 hypothetical protein CHLNCDRAFT_142762 [Chlorella variabilis] >EFN57642.1 hypothetical protein CHLNCDRAFT_142762 [Chlorella variabilis] 8.81e-09	-
TRINITY_DN2783_c1_g1	CAGGACGGTGCTGCCATGTTGTTACAGCCAGGCTTGTGCAGCTGGCCGGCAGCAGCGCAG GGGAGAGCAAGGGGATATCAGGGACAAATCGAGGATCGAGCAGGGGAGCGGGGGAGGATG TGGGGGCGAGGCTCATGCATCGGTGCAGGGGCGGGCCGTGCGTGCCGGTGTGGCCAGCGC CCAGCCTGAGTGAGGGTTACACCCTGGCTGCCGACACAGGGGCAGCGGTCTGACAGGCGT GTGCGTGCGCTGGTGGCCGAGCTCAGAGCAGCTTCCTGCCGTGCTGCGCCTGCTGGTTGA TGACCGCGATCTCCTGCTCATACTGGCTCACCATGTGCTGCAGGTGGTTGGGGCAGGGGC AGGAGGTGGCTGTGAGGGCGGTGCACGGCCAGG…	56.085	172.085	-1.61743	0	0	down	cd10919, CE4_CDA_like, Putative catalytic domain of chitin deacetylase-like proteins from insects and similar proteins. Chitin deacetylases (CDAs, EC 3.5.1.41) are secreted metalloproteins belonging to a family of extracellular chitin-modifying enzymes that catalyze the N-deacetylation of chitin, a beta-1,4-linked N-acetylglucosamine polymer, to form chitosan, a polymer of beta-(1,4)-linked d-glu…	-	-	-	-	GO:0003674, molecular_function;GO:0003824, catalytic activity;GO:0004553, hydrolase activity, hydrolyzing O-glycosyl compounds;GO:0004568, chitinase activity;GO:0005488, binding;GO:0005575, cellular_component;GO:0005576, extracellular region;GO:0006022, aminoglycan metabolic process;GO:0006026, aminoglycan catabolic process;GO:0006030, chitin metabolic process;GO:0006032, chitin catabolic process…	XP_005842845.1 hypothetical protein CHLNCDRAFT_55609 [Chlorella variabilis] >EFN50733.1 hypothetical protein CHLNCDRAFT_55609 [Chlorella variabilis] 7.71e-264	Chlorella variabilis hypothetical protein (CHLNCDRAFT_55609) mRNA, complete cds 0.0
TRINITY_DN2713_c2_g4	CCCGTTCCTACTGACTGTTCTGGAACCCCCACCACCTTGGCCAACCCTCGGACAGCCTCT CCGGCAATCCACTTGCACCACTCCAACATGTCACGCACCGTGACCATTTTGGTTGCTCTT GTTGCTGTGTTGGCTCTTCGAGGCGCTGTGGCAGTCACCGTGAGGGCTTCCACGCGCCCG CCGAAGAACATCAAGCGCCCTCCACAGTTCATCCTGTTCAGGTGAGTGGGAGGATCCATC TTGCGCCAATCCTGGTTGTTGGAGGTCTCGGGGTGGCTTGAACGACACTGGGCTTCCTCT CTCGCTCGACGATCCCGCGATGCGCGGCGCATCTTGCGGATGTCTCCAAAGTTTCGTATG CTTCGCGTTCTGCGCAAGACGGCAAAGCGCAGA…	48.3751	140.525	-1.53849	2.31182e-222	3.01631e-221	down	cd10919, CE4_CDA_like, Putative catalytic domain of chitin deacetylase-like proteins from insects and similar proteins. Chitin deacetylases (CDAs, EC 3.5.1.41) are secreted metalloproteins belonging to a family of extracellular chitin-modifying enzymes that catalyze the N-deacetylation of chitin, a beta-1,4-linked N-acetylglucosamine polymer, to form chitosan, a polymer of beta-(1,4)-linked d-glu…	-	-	-	-	GO:0003674, molecular_function;GO:0003824, catalytic activity;GO:0004099, chitin deacetylase activity;GO:0004553, hydrolase activity, hydrolyzing O-glycosyl compounds;GO:0004568, chitinase activity;GO:0005488, binding;GO:0006022, aminoglycan metabolic process;GO:0006026, aminoglycan catabolic process;GO:0006030, chitin metabolic process;GO:0006032, chitin catabolic process;GO:0006040, amino sugar…	PSC74790.1 hypothetical protein C2E20_2386 [Micractinium conductrix] 1.96e-75	-
TRINITY_DN2900_c3_g2	TCCGCCCCAACAGCAGCAGCAGCCGCCGCCGCCGCAGCAGCAGCAGGGCGGGCGGGGCGG CCGCGGCCGCGGGGGGCGAGATGGCGGGCGGGGGCGGGGCGGCGGACGCGGCGGGCGCGG CGCCCCGGGCCCCAAGCACCGTAGCATGGTTGACCTTGGCGAAGGGGGAGGGGGTTCAGG AGCAGGCAAGCCTGCTGCAAGTGCCGGCTTGCGCGGCTTCGTGCCCCGCGCCGCAGCCCT GGGCGGCCAGCAGAAGCCGCAGCAGGCGGGCGGCGAAGGCGGCGCTGCCGGGAGCGATGC ACCCAAGTCCAATGCTGACTTCCGGGCCATGTTCCTCAAAAAGTGATGTCCCCGGCCGCG TGCTTCACAGCCTTGCAGCCTTGCTGCCAGGAG…	23.8105	63.6013	-1.41746	3.70009e-68	2.06012e-67	down	cd10919, CE4_CDA_like, Putative catalytic domain of chitin deacetylase-like proteins from insects and similar proteins. Chitin deacetylases (CDAs, EC 3.5.1.41) are secreted metalloproteins belonging to a family of extracellular chitin-modifying enzymes that catalyze the N-deacetylation of chitin, a beta-1,4-linked N-acetylglucosamine polymer, to form chitosan, a polymer of beta-(1,4)-linked d-glu…	-	-	-	-	GO:0003674, molecular_function;GO:0003824, catalytic activity;GO:0004099, chitin deacetylase activity;GO:0004553, hydrolase activity, hydrolyzing O-glycosyl compounds;GO:0004568, chitinase activity;GO:0005488, binding;GO:0006022, aminoglycan metabolic process;GO:0006026, aminoglycan catabolic process;GO:0006030, chitin metabolic process;GO:0006032, chitin catabolic process;GO:0006040, amino sugar…	PSC71479.1 polysaccharide deacetylase [Micractinium conductrix] 2.18e-42	-
TRINITY_DN2991_c1_g2	GCTCGCCGCTGCATGTTGATCGAGATTTGAATGCAGCCGGTTGCAGCCCCCGAACACCAT GGCCGTCGAGACTCTGGACAGCAGGGCCTAGGCGCCTGCGGGAGCGCTTCCGAAACCCAT TTAGGAATGAGGGTCTCTCAGATCACGCTGCCGCCGCTAGTGGCCCCTCCCCAGCGGGGT GCGCTTCTCCTGTCGCTTGGCGCTATCAGCTGGGGCGAGGCGGCGCCCTCACAGTTGCAG CAGGCAGGGCAGGGCTCGCTGCAAGCGCGCGTGGCATGGTGGGGCGATGCCAGCGGCGGC GAGCCGGTGCCCCTGCCAGCGCCAGGCACCGCCGCAGCTTGCCTCGCCTTCCCGCTGCAC TCTGGTCCCAAGTACGTGACCCGGTACCTTAGG…	4.39178	11.4879	-1.38724	1.19348e-30	4.30715e-30	down	-	-	-	-	-	GO:0000166, nucleotide binding;GO:0001508, action potential;GO:0003674, molecular_function;GO:0005198, structural molecule activity;GO:0005488, binding;GO:0005515, protein binding;GO:0005575, cellular_component;GO:0005622, intracellular;GO:0005623, cell;GO:0005634, nucleus;GO:0005737, cytoplasm;GO:0005783, endoplasmic reticulum;GO:0005829, cytosol;GO:0005886, plasma membrane;GO:0006810, transport…	PRW60425.1 hypothetical protein C2E21_0846 [Chlorella sorokiniana] 1.41e-108	-
TRINITY_DN2900_c1_g1	GGACGATTCGTGTTGTATACACATGGACCAGCGAGGCAACAAGGCCTGGGCAGCTCTGTG CTGTTCTGCCGGTACTGGTGCTGAAGGTACCAGGCTGGGCACCTGCGGCACCACCAGAGT GTTCACGTGTTCAAGTACTGTGACAAATCCATGCGCAGCAGCGCCATGCTGGCGAAGAAA GAAATGAAGCGAGGGCAGTGCAGAGCTAGCAAAGGAGAGCGAGAGGTGCAGCGCGCACCG TCAGCAGAGGCAAAAGCGCAGAAACAAGGAGCAGGCAGTGAGGAACTTGTCAGTGCTCCG ACTGCAGCGCTGCTTTGCGGCGGGCTTGCAGGGTGGGCTTGTGGAAGTGCATGCGACGTG CCCACCAGGCTACGCCTGCGTGGCTGTCGGCTC…	7.79938	20.35	-1.38359	1.02398e-60	5.31479e-60	down	cd10919, CE4_CDA_like, Putative catalytic domain of chitin deacetylase-like proteins from insects and similar proteins. Chitin deacetylases (CDAs, EC 3.5.1.41) are secreted metalloproteins belonging to a family of extracellular chitin-modifying enzymes that catalyze the N-deacetylation of chitin, a beta-1,4-linked N-acetylglucosamine polymer, to form chitosan, a polymer of beta-(1,4)-linked d-glu…	-	-	-	-	GO:0003674, molecular_function;GO:0003824, catalytic activity;GO:0004099, chitin deacetylase activity;GO:0004553, hydrolase activity, hydrolyzing O-glycosyl compounds;GO:0004568, chitinase activity;GO:0005488, binding;GO:0006022, aminoglycan metabolic process;GO:0006026, aminoglycan catabolic process;GO:0006030, chitin metabolic process;GO:0006032, chitin catabolic process;GO:0006040, amino sugar…	KAI3430405.1 hypothetical protein D9Q98_005000 [Chlorella vulgaris] 1.85e-111	-
TRINITY_DN3627_c0_g3	GTTCAAGCGCAAGACGGGGACGGACCTGAGCGGCAGCGCGCGCGCGCTGCGCCGCCTGCG CACCGCCTGCGAGCGAGCCAAGATCACGCTCTCCTCTGCCGTGTCGGCTGCGGTGGAGCT GGACCACCTGTTCGAGGGCAATGACTTCTACTCCAACATATCGCGCGCCCGCTTTGAGGA GCTGTGCGGCGACCTGTTTGAGAAGTGCATGGACCCAGTGCAACGCGTGCTGAAGGACGC CAAGATCGCCAAGCAGGAGGTGCACGATGTGGTGCTGGTGGGCGGCTCCACCCGCATCCC CAAGGTGCAGCAGATGCTTCAGTCCTTTTTCGACGGCAAGGAGCTGTGCAAGTCGATTGA CCCTGATGAAGCGGTGGCCTACGGCGCAGCCGT…	3.18874	7.31858	-1.19858	4.04473e-11	9.95006e-11	down	cd10233, HSPA1-2_6-8-like_NBD, Nucleotide-binding domain of HSPA1-A, -B, -L, HSPA-2, -6, -7, -8, and similar proteins. This subfamily includes human HSPA1A (70-kDa heat shock protein 1A, also known as HSP72; HSPA1; HSP70I; HSPA1B; HSP70-1; HSP70-1A), HSPA1B (70-kDa heat shock protein 1B, also known as HSPA1A; HSP70-2; HSP70-1B), and HSPA1L (70-kDa heat shock protein 1-like, also known as HSP70T; …	pfam00012, HSP70, Hsp70 protein. Hsp70 chaperones help to fold many proteins. Hsp70 assisted folding involves repeated cycles of substrate binding and release. Hsp70 activity is ATP dependent. Hsp70 proteins are made up of two regions: the amino terminus is the ATPase domain and the carboxyl terminus is the substrate binding region. 5.91e-18	K03283-ko04612 Antigen processing and presentation;ko03040 Spliceosome;ko04213 Longevity regulating pathway - multiple species;ko04010 MAPK signaling pathway;ko04915 Estrogen signaling pathway;ko04141 Protein processing in endoplasmic reticulum;ko04144 Endocytosis	KOG0101, KOG0101, KOG0101, Molecular chaperones HSP70/HSC70, HSP70 superfamily [Posttranslational modification, protein turnover, chaperones]. 1.32e-18	sp|P11503|HSP70_ONCVO Heat shock 70 kDa protein (Fragment) OS=Onchocerca volvulus PE=2 SV=2 1.89e-15	GO:0000166, nucleotide binding;GO:0000302, response to reactive oxygen species;GO:0003674, molecular_function;GO:0005488, binding;GO:0005515, protein binding;GO:0005524, ATP binding;GO:0005575, cellular_component;GO:0005576, extracellular region;GO:0005618, cell wall;GO:0005622, intracellular;GO:0005623, cell;GO:0005737, cytoplasm;GO:0005739, mitochondrion;GO:0005773, vacuole;GO:0005774, vacuolar…	PSC70405.1 heat shock 70 kDa isoform A [Micractinium conductrix] 1.21e-160	PREDICTED: Sorghum bicolor probable mediator of RNA polymerase II transcription subunit 37c (LOC8072550), mRNA 1.92e-75
TRINITY_DN2783_c1_g3	GGCGTCCATGGTGTAGGGCCACAGGCGGTCGGCCCAGGAGGGGGAGGACTCGGTGTTGAA GGGCTCGATGATGGTGGAGTCGTACAGGTAGCCGGCGGCGGCCAGCACCTCGCGGTACTG CGGGTTGTGCACCAGGTAGGGGGCGCGGAATCCCCGGAACTTGTCGGCGGGCACCTTGCA GGTGTTGACCATCCAGTCGCGCACGCCCTCCACCTGCTTGGCCACCTCTTCCTTGGTCAG GTTGCCATACAGGGCCACGTGGTCCAGGGTGTGCCCGGCAATCTCGTGGTTGTCCTTGAG CAGCTGCTGCACAAAGGTGCAGTTGGTCTTGTCCTTGAGGGCAAACCAGGTGGCGGGGAC GTTGCAGCCGTTGGGGTTCTTGAAGCCGTCGGT…	112.756	253.79	-1.17044	2.70017e-113	2.0865e-112	down	cd10919, CE4_CDA_like, Putative catalytic domain of chitin deacetylase-like proteins from insects and similar proteins. Chitin deacetylases (CDAs, EC 3.5.1.41) are secreted metalloproteins belonging to a family of extracellular chitin-modifying enzymes that catalyze the N-deacetylation of chitin, a beta-1,4-linked N-acetylglucosamine polymer, to form chitosan, a polymer of beta-(1,4)-linked d-glu…	-	-	-	-	GO:0003674, molecular_function;GO:0003824, catalytic activity;GO:0004553, hydrolase activity, hydrolyzing O-glycosyl compounds;GO:0004568, chitinase activity;GO:0005488, binding;GO:0005575, cellular_component;GO:0005576, extracellular region;GO:0006022, aminoglycan metabolic process;GO:0006026, aminoglycan catabolic process;GO:0006030, chitin metabolic process;GO:0006032, chitin catabolic process…	XP_005842704.1 hypothetical protein CHLNCDRAFT_136266, partial [Chlorella variabilis] >EFN50572.1 hypothetical protein CHLNCDRAFT_136266, partial [Chlorella variabilis] 6.24e-96	Chlorella variabilis hypothetical protein (CHLNCDRAFT_55609) mRNA, complete cds 3.03e-12
TRINITY_DN3593_c3_g1	GGCAGGGCTGGGAGGCAGTTGCGCAGCCTCCAAAGGGGCAGCCTGCCCACGCTGGTGGGC TGGCTGCTGCTGCTGCTGCTGCTGCTGTGATGGATGCTGCTGACTATGTTGCTGGGTCCC TCCATGCCTTGGCAGGCTGTCGCTTCCAGCGCCTCTGCTGGGAGTTGCTGCGGCCTGCTG CCGGAATGGCAGTGAGGCATCACTCACAAGCGCCTCCCTCTCTTCATGCTGAAGCAGGCT CTGCAGCCGCTGCAGCTCAGCCTGGAGCCGCAGCAGCTCGCTGTGCCCGTCAGTGAAGCC AACAACGATGCCGCGGGACCCGTTGACCAGGTAGGGCGAGCTCGACAAGTTGGCGCACAG CACCACCTGCGCGCCCAGCTTCAGCTCCAGGCT…	8.38698	18.3282	-1.12784	5.45054e-12	1.37749e-11	down	cd18037, DEXSc_Pif1_like, DEAD-box helicase domain of Pif1. Pif1 and other members of this family are RecD-like helicases involved in maintaining genome stability through unwinding double-stranded DNAs (dsDNAs), DNA/RNA hybrids, and G quadruplex (G4) structures. The members of Pif1 helicase subfamily studied so far all appear to contribute to telomere maintenance. Pif1 is a member of the DEAD-lik…	-	-	-	sp|Q9UUA2|PIF1_SCHPO ATP-dependent DNA helicase pfh1 OS=Schizosaccharomyces pombe (strain 972 / ATCC 24843) GN=pfh1 PE=1 SV=1 6.84e-13	GO:0000002, mitochondrial genome maintenance;GO:0000166, nucleotide binding;GO:0000287, magnesium ion binding;GO:0000723, telomere maintenance;GO:0003674, molecular_function;GO:0003678, DNA helicase activity;GO:0003824, catalytic activity;GO:0004003, ATP-dependent DNA helicase activity;GO:0004386, helicase activity;GO:0004857, enzyme inhibitor activity;GO:0005488, binding;GO:0005524, ATP binding;…	PSC73047.1 DNA repair and recombination pif1 [Micractinium conductrix] 4.16e-131	-
TRINITY_DN3130_c0_g1	GCAGCAGCAGCAGCAGCAGCAGCAGCAGCAGCAGCCAGCGGCACTGCTTCGTGTACAGCT CGGCAGCCTGGAGCCTTCGGCAGCAGGCGCCAAGGCAGGGGTCGGTGGCAGCGTCCGCTG CGTGGTCAAGCCGCTGCAAAAGGGGGGCCAGGCGCAGCAGCTGACACTTTTTGTGGGCCA TGCCCAGGCAGAGGCGCGCCAAGTGGAACTGCCGCTGCTGCCAGCAGCGGCAGCAGCAGC GACCGGTCAGGTGCACAGGCACCCTGTGCTGCCGCCGTACCTTTTCCTCGAGTTTTGGCT GCACAGTGGCAGCCTTATTGGCGTTGCAAGGGTGCCGTTGCTGCTGCGCTGCACTCCGGC CGCAGCCCCAGCAGCTGGTTCCGCCGAGCAGCG…	5.00664	10.8345	-1.11372	4.12244e-23	1.31221e-22	down	-	-	-	-	-	GO:0000166, nucleotide binding;GO:0001508, action potential;GO:0003674, molecular_function;GO:0005198, structural molecule activity;GO:0005488, binding;GO:0005515, protein binding;GO:0005575, cellular_component;GO:0005622, intracellular;GO:0005623, cell;GO:0005634, nucleus;GO:0005737, cytoplasm;GO:0005783, endoplasmic reticulum;GO:0005829, cytosol;GO:0005886, plasma membrane;GO:0006810, transport…	PSC68159.1 hypothetical protein C2E20_8218 [Micractinium conductrix] 1.34e-211	-
TRINITY_DN2713_c2_g2	TATCACGCGATTGAGGCGTGGCAATAGGTTGCAGGGCCGACCAGCTGCTGCTTACAACCC ACGCGGCGAGGAGATTGTCCCATCGCGACGGCGCGTGAGGTCTTTGGGTCTATCCACATG GCGCGCTCGGCTGCCGTGGCCATCGCCGCTATGGCGCTGCTGCTGGCGGGGCCCGCTGCA GCTGTGACGCTGCCCAGCTGGTACAAGTGCACCTGCAGCAGCAGCAGCAAGCAGCCGTGC GTGTGCCCGTCAACGTCGCCGCCGGGGGGCCTGTCGCCGTCTGACACGCCGCAGTTTGTG CTGTTCACGCATGACGACGCCGTGACGTCGACCACCGCCGCCACCATGCACGAGATTGTC GACGGCAAGGCCACCCCCGACGGCTGCCCCGTG…	17.544	37.6082	-1.10007	1.01432e-64	5.4513e-64	down	cd10919, CE4_CDA_like, Putative catalytic domain of chitin deacetylase-like proteins from insects and similar proteins. Chitin deacetylases (CDAs, EC 3.5.1.41) are secreted metalloproteins belonging to a family of extracellular chitin-modifying enzymes that catalyze the N-deacetylation of chitin, a beta-1,4-linked N-acetylglucosamine polymer, to form chitosan, a polymer of beta-(1,4)-linked d-glu…	-	-	-	-	GO:0003674, molecular_function;GO:0003824, catalytic activity;GO:0004099, chitin deacetylase activity;GO:0004553, hydrolase activity, hydrolyzing O-glycosyl compounds;GO:0004568, chitinase activity;GO:0005488, binding;GO:0006022, aminoglycan metabolic process;GO:0006026, aminoglycan catabolic process;GO:0006030, chitin metabolic process;GO:0006032, chitin catabolic process;GO:0006040, amino sugar…	PSC74020.1 polysaccharide deacetylase [Micractinium conductrix] 8.33e-127	-
TRINITY_DN2955_c0_g3	GCGGTCCACCATGGGAGCCTGCTGTGCCTGCCACCGGATAGCATGCGAAATCCCGCCTCT AGCGGCAAGACCGAGCTGCCATCGCTGCCTTCGCCCGCCGCTCGTCCTCTGTACACTCAG AAGCCACACTTAGCAGCCATGGCTTCCTCCCTGGCCTTCAAGAGCACGCTGCTGGCCGGC AAGGCCCGCCGTACCAGCCTGGTGGTGCGCGCCGAGGAGGCTGCCGCGGCGCCTGCCCCC GTCAAGAAGCCGGACGTCGGCCCCAAGCGCGGCACCACTGTGCGCATCCTGCGGCCCGAG TCCTACTGGTTCCGGGAGACCGGCAAGGTGGTGTCCGTGGACCAGAGCGGCATCCGCTAC CCCGTGGTGGTGCGCTTCGAGAAGGTGAACTAC…	1010.62	489.17	1.04683	0	0	up	cd04300, GT35_Glycogen_Phosphorylase, glycogen phosphorylase and similar proteins. This is a family of oligosaccharide phosphorylases. It includes yeast and mammalian glycogen phosphorylases, plant starch/glucan phosphorylase, as well as the maltodextrin phosphorylases of bacteria. The members of this family catalyze the breakdown of oligosaccharides into glucose-1-phosphate units. They are impor…	pfam00343, Phosphorylase, Carbohydrate phosphorylase. The members of this family catalyze the formation of glucose 1-phosphate from one of the following polyglucoses; glycogen, starch, glucan or maltodextrin. 7.72e-13	K00688-ko04922 Glucagon signaling pathway;ko04910 Insulin signaling pathway;ko00500 Starch and sucrose metabolism	KOG2099, KOG2099, KOG2099, Glycogen phosphorylase [Carbohydrate transport and metabolism]. 8.98e-16	sp|Q9XTL9|PYG_DROME Glycogen phosphorylase OS=Drosophila melanogaster GN=GlyP PE=2 SV=2 3.51e-09	GO:0000272, polysaccharide catabolic process;GO:0003674, molecular_function;GO:0003824, catalytic activity;GO:0004645, phosphorylase activity;GO:0005488, binding;GO:0005575, cellular_component;GO:0005622, intracellular;GO:0005623, cell;GO:0005737, cytoplasm;GO:0005975, carbohydrate metabolic process;GO:0005976, polysaccharide metabolic process;GO:0005977, glycogen metabolic process;GO:0005980, gl…	PSC73274.1 glycosyltransferase family 35 [Micractinium conductrix] 0.0	Chlorella variabilis hypothetical protein (CHLNCDRAFT_58959) mRNA, complete cds 2.29e-40
TRINITY_DN2618_c2_g3	CGTTGGACCACCCGGGTATCCCGCGCTACCTGGCCTCGTTTGAGCAGGACACGGAGCAGG ACCGCGCCTTCTTCCTGGTGCAGGAAGCGGCGCAGGGCAAGTCTCTGGCCGACATGGTGC GCTCTGGCTGGCGCGCCGACGAGGCCGAGGTGTCGCGCATCGCCGGCGAGCTGCTGGACA TCCTGCAGTACCTGGGCAGCCGCCGCCCGCCCGTCATCCACAGGGACGTGAAGCCGGAGA ACATTGTGGTCGAGGGTGGCAGGACGGGGGGCCGCGTCTTCCTGGTCGACTTTGGCGGGG TGCAGGCCGCCGCCTCCACCGCCGAGGACGCCCTGGGCAGCACCATCGTGGGCACCTACG GTTACATGGCGCCGGAGCAGTTCCGCGGCGCCG…	61.3695	27.322	1.16746	4.33975e-137	3.8142e-136	up	cd13990, STKc_TLK, Catalytic domain of the Serine/Threonine kinase, Tousled-Like Kinase. STKs catalyze the transfer of the gamma-phosphoryl group from ATP to serine/threonine residues on protein substrates. TLKs play important functions during the cell cycle and are implicated in chromatin remodeling, DNA replication and repair, and mitosis. They phosphorylate and regulate Anti-silencing function…	-	-	KOG1151, KOG1151, KOG1151, Tousled-like protein kinase [Signal transduction mechanisms]. 1.30e-12	sp|P74297|SPKB_SYNY3 Serine/threonine-protein kinase B OS=Synechocystis sp. (strain PCC 6803 / Kazusa) GN=spkB PE=1 SV=1 4.08e-15	GO:0000003, reproduction;GO:0000011, vacuole inheritance;GO:0000122, negative regulation of transcription by RNA polymerase II;GO:0000165, MAPK cascade;GO:0000166, nucleotide binding;GO:0000322, storage vacuole;GO:0000323, lytic vacuole;GO:0000324, fungal-type vacuole;GO:0000920, cell separation after cytokinesis;GO:0001410, chlamydospore formation;GO:0001932, regulation of protein phosphorylatio…	PSC76759.1 serine threonine kinase [Micractinium conductrix] 4.17e-126	Chlorella variabilis hypothetical protein (CHLNCDRAFT_32227) mRNA, partial cds 8.14e-72
TRINITY_DN2677_c1_g2	TAAAGCATGCAGGCACACCCCGCCGCCGCGCAGTGCTCGTGCACGCCGAGTCCTGCTGCG CCCGAAGGAGACGCTTGGCCCCAGGAACCAGAGCGAGAGGTGTGCCACGAGATCTTCATT GTCCGGGAACTTCTGCGAGGACTTAATTCACGGCTGCAACCCAAGCAGCGACACGCCTCC TGTGCCCGATGGGCCATGGCGCCTGGGCACCAGCCCTGGCTCAAGCAGCACTCTGCCTGC TTCTTCTAGCCGTGCCAGCGCATGCAGCGGGCCGATTACTGGAGTCTGCAGCAGAGCAGG CGGGCTTTCCCGCCCTGGGACCGGCGGCGTCCGCGGCTGCACTGCACGGCAGCAGCAGCG GCTGCACCGGCGGATCTGGAGGCACCACCAGCA…	9.41659	2.79792	1.75085	5.82485e-45	2.56717e-44	up	-	-	-	-	-	GO:0000166, nucleotide binding;GO:0001508, action potential;GO:0003674, molecular_function;GO:0005198, structural molecule activity;GO:0005488, binding;GO:0005515, protein binding;GO:0005575, cellular_component;GO:0005622, intracellular;GO:0005623, cell;GO:0005634, nucleus;GO:0005737, cytoplasm;GO:0005783, endoplasmic reticulum;GO:0005829, cytosol;GO:0005886, plasma membrane;GO:0006810, transport…	KAI3429363.1 hypothetical protein D9Q98_005458 [Chlorella vulgaris] 3.46e-172	-
TRINITY_DN3135_c2_g3	GGCAGAGCAGCATGAGGTCAGCCACCTCCTGCGGGCACTCCTCTGGCACCCTGGGCAGGC GCAGGTTGCCCCTCACGGGGCGCTCGCCGGTCAGCAGCTCCCACAGCACCACGCCAAAGC TGTAGATGTCGGCGGGGCGCCCGCAGTCGTGGCCGCCAAGCAGCACCTCTGGCGCGGCCC AGGCAAAGGTGCCGATGCAGGAGACAGCCGACAGGTGTGTCCTCTCCAGCAGGCGGGACA GGCCGACGTCACCCAGCTTGGCGGCACCCCGCGCCGACAGCAGCACATTGCTGCTCTTCA CGTCCATGTGCACGATGCCCAGGGAGTGCAGGTGGGCAATGGCTTCAGCCAGGTGCAGCG CCACACGCCGGCCGCGGTGCCACCAGCCAAAGA…	1.89347	0.528288	1.84164	3.07391e-10	7.38333e-10	up	cd13999, STKc_MAP3K-like, Catalytic domain of Mitogen-Activated Protein Kinase (MAPK) Kinase Kinase-like Serine/Threonine kinases. STKs catalyze the transfer of the gamma-phosphoryl group from ATP to serine/threonine residues on protein substrates. This subfamily is composed mainly of MAP3Ks and similar proteins, including TGF-beta Activated Kinase-1 (TAK1, also called MAP3K7), MAP3K12, MAP3K13, …	pfam07714, Pkinase_Tyr, Protein tyrosine kinase. 3.33e-21	-	KOG0192, KOG0192, KOG0192, Tyrosine kinase specific for activated (GTP-bound) p21cdc42Hs [Signal transduction mechanisms]. 1.77e-29	sp|Q55GG4|Y9847_DICDI Probable serine/threonine-protein kinase DDB_G0267686 OS=Dictyostelium discoideum GN=DDB_G0267686 PE=3 SV=1 2.59e-25	GO:0000075, cell cycle checkpoint;GO:0000077, DNA damage checkpoint;GO:0000165, MAPK cascade;GO:0000166, nucleotide binding;GO:0000186, activation of MAPKK activity;GO:0000187, activation of MAPK activity;GO:0000278, mitotic cell cycle;GO:0000287, magnesium ion binding;GO:0001932, regulation of protein phosphorylation;GO:0001934, positive regulation of protein phosphorylation;GO:0003674, molecula…	PRW33664.1 serine threonine- kinase receptor R831 [Chlorella sorokiniana] 1.47e-83	-
TRINITY_DN3380_c1_g1	CTGTAACATTGTCCTGCAATTTACCAATCACCTGCCATCCCTCAGCAGCTTCAAACCTCC CCAGCCCTGTCCCGACATCCCACTGTTGCACGACAGTGCGAACAACGCTGTCTGGACGGC CAATTGGCACCTTCTCATCGCCATCTATAGTGGGCAGTCGCGCACTGGCCGGTTTGGCGC CTTGTGCCCGAGGACATGAACCCCTGCTCGCTCCCGCAGCCCTGACCAGCCCTGCTTCAT GGAGACCAAGCTCTTGGCAGTCCTGGTGGCCGCGATGGCCATCGCCGCAGGCGCGCAGAG ACCCCCCAGCCTGATGCCTCCCGGCGGCCTGCCGCCAGCCGCCACCCCCCAGTTCGTCCT GCTGACGCACGACGACTCCATACCCAGCTCCTC…	5.42991	1.45833	1.89661	3.43995e-21	1.05959e-20	up	cd10919, CE4_CDA_like, Putative catalytic domain of chitin deacetylase-like proteins from insects and similar proteins. Chitin deacetylases (CDAs, EC 3.5.1.41) are secreted metalloproteins belonging to a family of extracellular chitin-modifying enzymes that catalyze the N-deacetylation of chitin, a beta-1,4-linked N-acetylglucosamine polymer, to form chitosan, a polymer of beta-(1,4)-linked d-glu…	-	-	-	-	GO:0003674, molecular_function;GO:0003824, catalytic activity;GO:0004099, chitin deacetylase activity;GO:0004553, hydrolase activity, hydrolyzing O-glycosyl compounds;GO:0004568, chitinase activity;GO:0005488, binding;GO:0006022, aminoglycan metabolic process;GO:0006026, aminoglycan catabolic process;GO:0006030, chitin metabolic process;GO:0006032, chitin catabolic process;GO:0006040, amino sugar…	XP_005844471.1 hypothetical protein CHLNCDRAFT_58845 [Chlorella variabilis] >EFN52369.1 hypothetical protein CHLNCDRAFT_58845 [Chlorella variabilis] 1.98e-52	-
TRINITY_DN2301_c0_g1	CTCGAGTTTTTTTAAAGAGGGTTTAAACGAGAACGCGGCAACTGGGGGGCAGCAGTAGAG CTCAGGCACAAGCCAGGGGGCACAAGCCCTTGTGCGCTCTGGCACAGGCAGAGAGAAGGC CCGCACACTGTAGCAATCGCGCAGCGCACGGGAAGGAGGATCGATGTGAGACGCGTTGGA GCATGCAGAATGCTGCAAAGCTGCCTTGTTCAGGAGGCAGCTGCCGCTCTGGTTGGAACG GTCCAGGTACAATTGAGCGACACAGGAGGATGCAGTTGGCAGCAGGGAACAGGAATGCAG ACGAATCACACAAGAAAGGACGGATTGAAATCAGGGAATGAGGAAATGGGGAGTTGGATG GGATGGGGAAGCGGCAAAGCCTGCGGGATGGCT…	41.2984	7.97308	2.37288	2.4909e-239	3.46782e-238	up	cd10919, CE4_CDA_like, Putative catalytic domain of chitin deacetylase-like proteins from insects and similar proteins. Chitin deacetylases (CDAs, EC 3.5.1.41) are secreted metalloproteins belonging to a family of extracellular chitin-modifying enzymes that catalyze the N-deacetylation of chitin, a beta-1,4-linked N-acetylglucosamine polymer, to form chitosan, a polymer of beta-(1,4)-linked d-glu…	-	-	-	-	GO:0003674, molecular_function;GO:0003824, catalytic activity;GO:0004099, chitin deacetylase activity;GO:0004553, hydrolase activity, hydrolyzing O-glycosyl compounds;GO:0004568, chitinase activity;GO:0005488, binding;GO:0006022, aminoglycan metabolic process;GO:0006026, aminoglycan catabolic process;GO:0006030, chitin metabolic process;GO:0006032, chitin catabolic process;GO:0006040, amino sugar…	PSC76522.1 polysaccharide deacetylase [Micractinium conductrix] 4.26e-88	Chlorella variabilis hypothetical protein (CHLNCDRAFT_145232) mRNA, complete cds 5.27e-24
TRINITY_DN3351_c3_g1	GCTGCTGCTAGTGCCAGGAGCGCTCCCACGATGCCGCCAACAATGGCGCCCACTGGGGGG CCGCCGCCGCCGCTGCTGCTGGTGTCGGCAGCAGCGCCTGCACTGGCCTGCTCAGACCCA GGAGAGGGTGCTGCCGCCGGGCTGGAGCTGATAGCAGGCGAGGGCGGCGCAGTCGGGGCA TGAGGGGAGGGCGCGGCGGGAGCTGCAGAGCCTTGGGCCACAGGCGGCGAGGTCACCGCT GGCGGGGGCGTGGGTTGGGCTGCCGGGGCCGGCACCGCCAGGTCTGTGCCATTCTGCAGC GCGGGCCAGGGCCCAAAGGCAGCGGCACGTCAGCGGCAGCCCTGCTGTGCTGGACCCCAT GGGGTGTTTCTGCCACAGGCGGCGCATGCACTG…	4.75712	0.914022	2.37979	3.88822e-15	1.06464e-14	up	-	-	-	-	-	GO:0003674, molecular_function;GO:0003824, catalytic activity;GO:0004099, chitin deacetylase activity;GO:0004553, hydrolase activity, hydrolyzing O-glycosyl compounds;GO:0004568, chitinase activity;GO:0005488, binding;GO:0006022, aminoglycan metabolic process;GO:0006026, aminoglycan catabolic process;GO:0006030, chitin metabolic process;GO:0006032, chitin catabolic process;GO:0006040, amino sugar…	PSC69105.1 hypothetical protein C2E20_7356 [Micractinium conductrix] 4.48e-10	-
TRINITY_DN3757_c3_g4	GGCGAGGGTACCATTACTTATAAGGGATGACATCAAAATAGTGACAGCAATGTATCGAAT TGGCTCAGTGCACATTCAAGATAGAGACATGAGTGAGCAACACACAACTGGGGACCTCGG CTGCACTTGAACACTACTTGCATTCTGCTACGTTGTAGCTGCATTCTGCTAGATTTGTTT GTGCTTGGAGGAAAACCCCGAAATATGAAAAAACGCATCCACTCCACAGCAGTGTAGTCA ACGCTGGACTAACGGCGAGCTGGTGCCATCCAACGGCTGCACAGGCGGCATCACCGCCGG CCTGCCCTCCTGGCCAGCTGCGCCGTGTAGATGTTGGCGGGGCCCTTGATGCTGCGCTCA TAGTGCCAGGAGGAGCACATACCACGGTAATTT…	16.4378	2.99028	2.45867	1.2941e-113	1.00357e-112	up	-	-	-	-	-	GO:0000166, nucleotide binding;GO:0001508, action potential;GO:0003674, molecular_function;GO:0005198, structural molecule activity;GO:0005488, binding;GO:0005515, protein binding;GO:0005575, cellular_component;GO:0005622, intracellular;GO:0005623, cell;GO:0005634, nucleus;GO:0005737, cytoplasm;GO:0005783, endoplasmic reticulum;GO:0005829, cytosol;GO:0005886, plasma membrane;GO:0006810, transport…	KAI3423939.1 hypothetical protein D9Q98_009773 [Chlorella vulgaris] 5.40e-191	-
TRINITY_DN2727_c2_g2	CCCACCCCTGGCCCAACCCCTCGACACCGGCCCCACACCATGGCACGGATCCCCCTCTTC CTCACCATGCTCGCCCTACTGGCGCTCAACACCCACACGGCCAGCGGCCGCGCCCTGCTG GGGCGTCACGGCGGCGCCTCGGCCTCTGAGGCCGCGCTGCTGGCGCAGCAGCAGCAGGAG CTGGCGGCCCTGGTCCAGCAGGGCCAGGCCGACATCGCGCAGCAGGCCGCCGCCGAGGCC GCCAAGGCGCAGGAGGCCGCCAACCGCCAGACCGCCCGCGAGGCGCAGCAGGCCGCCGAC CAGGCTGCCCAGGCGGCACAGCAGTTTGGGGACCAGGCCACCGCCGACCAGCAGGCAGTG CTGGAGGAGCAGGCGCGCCAGGTGCGACCATGA…	139.117	19.8786	2.80701	0	0	up	-	pfam00967, Barwin, Barwin family. 8.99e-18	-	-	sp|P29063|PR4B_TOBAC Pathogenesis-related protein PR-4B OS=Nicotiana tabacum PE=2 SV=1 2.23e-14	GO:0002376, immune system process;GO:0003674, molecular_function;GO:0003824, catalytic activity;GO:0004518, nuclease activity;GO:0004540, ribonuclease activity;GO:0005488, binding;GO:0006139, nucleobase-containing compound metabolic process;GO:0006725, cellular aromatic compound metabolic process;GO:0006807, nitrogen compound metabolic process;GO:0006950, response to stress;GO:0006952, defense re…	PSC72907.1 chitin binding domain-containing [Micractinium conductrix] 2.61e-54	-
TRINITY_DN3238_c1_g1	TGTCATACTTGCGTGTGGATCAACAGTCTACAGGGAGCAAAGTGCTTTGCAACTAGCTGA GTCGTGCTCAGGGTAGGCCAGAGAGGGAGGGCAGGGGCGCCCCTGCCGGCAGGGTGCTAC TAGCAAGTATTATTTGCGACTGAGGGTGAGCAGGTGAGAGAGGGGTCATTCATTTGGAAG GTGATAAGTGACGAGGGGATTGCGAGGAAGGCCTAGGGGGGCACGGCGGTTGCCTGGCAT GGCAGGGCTGGAAAAAAGAGGGAGCCAGATGGCGCTCTGAAGCCTCGCCGGCGAAAGAAT TGACAAGTCCACAGACGAAGGGACGGCCTGTTTGGCAGGCGCAGACGTTACGTTTGTTGG CGACGGCAGAGGCAAGCAAGGAGATGGCAGGCG…	10.5237	0.40853	4.68706	1.96888e-142	1.77574e-141	up	cd06614, STKc_PAK, Catalytic domain of the Serine/Threonine Kinase, p21-activated kinase. STKs catalyze the transfer of the gamma-phosphoryl group from ATP to serine/threonine residues on protein substrates. PAKs are Rho family GTPase-regulated kinases that serve as important mediators in the function of Cdc42 (cell division cycle 42) and Rac. PAKs are implicated in the regulation of many cellula…	pfam07714, Pkinase_Tyr, Protein tyrosine kinase. 6.24e-06	-	KOG0199, KOG0199, KOG0199, ACK and related non-receptor tyrosine kinases [Signal transduction mechanisms]. 8.63e-13	sp|C0LGQ5|GSO1_ARATH LRR receptor-like serine/threonine-protein kinase GSO1 OS=Arabidopsis thaliana GN=GSO1 PE=2 SV=1 1.30e-11	GO:0000075, cell cycle checkpoint;GO:0000077, DNA damage checkpoint;GO:0000165, MAPK cascade;GO:0000166, nucleotide binding;GO:0000186, activation of MAPKK activity;GO:0000187, activation of MAPK activity;GO:0000278, mitotic cell cycle;GO:0000287, magnesium ion binding;GO:0001932, regulation of protein phosphorylation;GO:0001934, positive regulation of protein phosphorylation;GO:0003674, molecula…	PRW33664.1 serine threonine- kinase receptor R831 [Chlorella sorokiniana] 8.92e-65	-
