# Supplementary material for: Physiological and transcriptomic responses of Chlorella vulgaris to novel antibacterial nanoparticles of ethyl cyanoacrylate polymer
Source: Royal Society of Chemistry journal article supplement (doi:10.1039/d4en00861h), 2025-01-01
Supplement: d4en00861h6.xlsx [file d4en00861h6.xlsx]

## Sheet: Sheet1
Gene id	MeanTPM (NPs1)	MeanTPM (Con1)	log2FoldChange	pValue	qValue	result
TRINITY_DN3250_c0_g1	29.8286	7574.8	-7.98837	0	0	down
TRINITY_DN3728_c3_g1	155.95	2586.3	-4.05174	0	0	down
TRINITY_DN2699_c3_g2	222.105	8064.87	-5.18234	0	0	down
TRINITY_DN3114_c2_g2	5.49592	8700.78	-10.6286	0	0	down
TRINITY_DN3661_c1_g2	127.566	4669.01	-5.1938	0	0	down
TRINITY_DN3580_c2_g1	27.5086	2046.93	-6.21744	0	0	down
TRINITY_DN3687_c0_g4	14287.6	6634.58	1.10668	0	0	up
TRINITY_DN3733_c1_g1	8.8222	5198.39	-9.20271	0	0	down
TRINITY_DN2813_c1_g1	24906.2	11272.7	1.14367	0	0	up
TRINITY_DN3729_c0_g1	19.1585	848.474	-5.46881	0	0	down
TRINITY_DN3348_c3_g1	53.2017	1241.62	-4.54461	0	0	down
TRINITY_DN3706_c2_g5	1923.13	677.989	1.50412	0	0	up
TRINITY_DN2642_c2_g4	2647.13	409.905	2.69107	0	0	up
TRINITY_DN3375_c3_g12	7414.59	2629.74	1.49545	0	0	up
TRINITY_DN2968_c2_g2	686.363	6779.8	-3.3042	0	0	down
TRINITY_DN3687_c0_g3	33252.9	13897.4	1.25867	0	0	up
TRINITY_DN2994_c2_g2	27.6917	273.776	-3.30547	0	0	down
TRINITY_DN2852_c2_g3	336.523	2446.5	-2.86194	0	0	down
TRINITY_DN3681_c0_g6	22.5587	2333.42	-6.69261	0	0	down
TRINITY_DN3480_c0_g9	15604.9	6634.44	1.23395	0	0	up
TRINITY_DN3548_c1_g2	16534.7	8201.58	1.01152	0	0	up
TRINITY_DN3273_c0_g2	35.4501	571.593	-4.01113	0	0	down
TRINITY_DN3028_c1_g9	4638.52	2290.13	1.01823	0	0	up
TRINITY_DN2889_c1_g5	3271.37	877.202	1.89891	0	0	up
TRINITY_DN2733_c0_g1	48.7761	845.715	-4.11592	0	0	down
TRINITY_DN2921_c3_g2	3217.61	1131.91	1.50724	0	0	up
TRINITY_DN3706_c2_g1	3979.51	1698.97	1.22793	0	0	up
TRINITY_DN2750_c0_g1	1217.21	44.0439	4.78849	0	0	up
TRINITY_DN2938_c0_g7	9.35945	1000.09	-6.7395	0	0	down
TRINITY_DN2899_c0_g4	2700.59	905.755	1.57608	0	0	up
TRINITY_DN3457_c1_g1	677.412	2520.11	-1.89538	0	0	down
TRINITY_DN3681_c0_g3	141.546	1682.75	-3.57148	0	0	down
TRINITY_DN3480_c0_g3	3674.44	1556.63	1.2391	0	0	up
TRINITY_DN3548_c1_g8	2211.21	699.438	1.66057	0	0	up
TRINITY_DN2619_c3_g4	1428.45	691.228	1.04721	0	0	up
TRINITY_DN3222_c1_g3	46.323	1008.84	-4.44483	0	0	down
TRINITY_DN3515_c0_g1	112.653	613.083	-2.44419	0	0	down
TRINITY_DN2729_c0_g2	57.2947	1480.55	-4.69159	0	0	down
TRINITY_DN2634_c4_g2	22.5038	549.258	-4.60925	0	0	down
TRINITY_DN2950_c3_g2	2096.88	892.153	1.23288	0	0	up
TRINITY_DN1830_c0_g1	25.2786	1635.66	-6.01581	0	0	down
TRINITY_DN3068_c0_g2	1864.21	716.27	1.37999	0	0	up
TRINITY_DN3480_c0_g6	3708.31	1508.34	1.2978	0	0	up
TRINITY_DN3587_c5_g1	101.132	819.362	-3.01826	0	0	down
TRINITY_DN3706_c2_g4	3000.14	1235.43	1.28002	0	0	up
TRINITY_DN3439_c3_g2	314.383	1372.04	-2.12572	0	0	down
TRINITY_DN3502_c1_g5	5793.91	2118.26	1.45166	0	0	up
TRINITY_DN3354_c1_g4	21.7422	477.501	-4.45693	0	0	down
TRINITY_DN3635_c3_g1	122.499	605.182	-2.3046	0	0	down
TRINITY_DN3441_c1_g2	130.84	754.746	-2.52819	0	0	down
TRINITY_DN1636_c0_g1	3819.5	1179.95	1.69466	0	0	up
TRINITY_DN3548_c1_g6	4243.12	1972.34	1.10522	0	0	up
TRINITY_DN2955_c0_g7	5.92867	1069.03	-7.49438	0	0	down
TRINITY_DN2642_c2_g3	141.019	1405.2	-3.31681	0	0	down
TRINITY_DN3600_c1_g3	334.818	37.7852	3.14749	0	0	up
TRINITY_DN3663_c2_g1	197.981	1069.09	-2.43296	0	0	down
TRINITY_DN2988_c0_g1	378.456	52.6355	2.84602	0	0	up
TRINITY_DN3582_c3_g1	57.4936	366.731	-2.67325	0	0	down
TRINITY_DN3070_c1_g9	4899.62	2417.12	1.01938	0	0	up
TRINITY_DN2832_c2_g2	106.704	1269.84	-3.57296	0	0	down
TRINITY_DN3137_c1_g1	122.72	942.325	-2.94085	0	0	down
TRINITY_DN2609_c2_g1	183.313	1398.35	-2.93135	0	0	down
TRINITY_DN2399_c0_g1	1553.2	656.655	1.24203	0	0	up
TRINITY_DN3480_c0_g2	1643.45	677.228	1.27901	0	0	up
TRINITY_DN3480_c0_g7	9117.4	3881.56	1.23199	0	0	up
TRINITY_DN2574_c0_g2	2135.57	634.614	1.75067	0	0	up
TRINITY_DN3106_c3_g1	1263.45	516.966	1.28923	0	0	up
TRINITY_DN2990_c4_g1	9.83648	5282.71	-9.06892	0	0	down
TRINITY_DN2928_c1_g7	25.4655	492.676	-4.27402	0	0	down
TRINITY_DN2921_c1_g1	1229.46	510.838	1.26709	0	0	up
TRINITY_DN2637_c1_g5	1596	532.774	1.58287	0	0	up
TRINITY_DN2650_c1_g1	996.67	2918.82	-1.5502	0	0	down
TRINITY_DN3334_c2_g1	35.3914	545.371	-3.94577	0	0	down
TRINITY_DN2790_c0_g1	331.813	1810.89	-2.44826	0	0	down
TRINITY_DN2876_c0_g1	5074.49	1831.31	1.47039	0	0	up
TRINITY_DN2884_c0_g2	674.323	190.979	1.82003	0	0	up
TRINITY_DN3384_c0_g2	98.988	3.04648	5.02204	0	0	up
TRINITY_DN2993_c1_g2	785.201	290.37	1.43517	0	0	up
TRINITY_DN3149_c0_g1	40.1768	345.131	-3.10271	0	0	down
TRINITY_DN2889_c1_g1	418.414	0.890534	8.87604	0	0	up
TRINITY_DN3105_c1_g2	144.281	831.895	-2.52752	0	0	down
TRINITY_DN3274_c1_g1	54.4892	307.268	-2.49545	0	0	down
TRINITY_DN3039_c1_g4	654.153	1.34714	8.92358	0	0	up
TRINITY_DN3728_c2_g1	991.439	311.676	1.66948	0	0	up
TRINITY_DN2719_c3_g2	380.114	72.5922	2.38855	0	0	up
TRINITY_DN2783_c0_g1	124.079	602.38	-2.27942	0	0	down
TRINITY_DN2522_c0_g1	1191.69	363.36	1.71354	0	0	up
TRINITY_DN2559_c3_g2	1317.15	521.88	1.33563	0	0	up
TRINITY_DN3583_c0_g3	17.4292	223.382	-3.67994	0	0	down
TRINITY_DN3418_c1_g2	322.949	1002.77	-1.63461	0	0	down
TRINITY_DN3217_c0_g1	7.27565	139.8	-4.26415	0	0	down
TRINITY_DN3554_c4_g1	59.0331	391.284	-2.72862	0	0	down
TRINITY_DN2769_c2_g1	870.475	274.561	1.66468	0	0	up
TRINITY_DN3365_c0_g1	25.3992	157.991	-2.63699	0	0	down
TRINITY_DN1681_c0_g1	2364.98	429.864	2.45988	0	0	up
TRINITY_DN3388_c2_g1	1608.53	795.496	1.01581	0	0	up
TRINITY_DN2759_c0_g4	192.606	665.435	-1.78865	0	0	down
TRINITY_DN2059_c0_g1	868.351	215.863	2.00816	0	0	up
TRINITY_DN3669_c4_g1	645.262	137.068	2.235	0	0	up
TRINITY_DN3750_c1_g1	31.8207	208.496	-2.71198	0	0	down
TRINITY_DN3101_c3_g1	598.914	34.7865	4.10575	0	0	up
TRINITY_DN2633_c1_g1	83.9958	402.276	-2.2598	0	0	down
TRINITY_DN861_c0_g1	2722.84	867.724	1.64981	0	0	up
TRINITY_DN3681_c0_g8	33.9272	3591.65	-6.72606	0	0	down
TRINITY_DN3592_c4_g1	169.326	34.1904	2.30814	0	0	up
TRINITY_DN2377_c0_g1	34.6118	286.23	-3.04784	0	0	down
TRINITY_DN2532_c1_g1	11.4174	183.716	-4.00817	0	0	down
TRINITY_DN3687_c0_g5	6797.02	2756.87	1.30187	0	0	up
TRINITY_DN3200_c1_g5	373.042	1.43906	8.01807	0	0	up
TRINITY_DN3528_c2_g4	30.231	320.315	-3.40539	0	0	down
TRINITY_DN3091_c1_g6	69.6785	588.398	-3.07801	0	0	down
TRINITY_DN3016_c0_g2	1182	535.53	1.14219	0	0	up
TRINITY_DN2903_c0_g1	445.465	135.495	1.71707	0	0	up
TRINITY_DN2608_c2_g2	16.5972	187.28	-3.49619	0	0	down
TRINITY_DN3526_c2_g2	250.069	74.0676	1.75541	0	0	up
TRINITY_DN3744_c1_g1	217.88	27.6516	2.9781	0	0	up
TRINITY_DN2587_c1_g2	907.424	330.13	1.45874	0	0	up
TRINITY_DN3636_c0_g1	437.575	45.234	3.27405	0	0	up
TRINITY_DN2623_c5_g2	1096.31	483.195	1.18197	0	0	up
TRINITY_DN2604_c4_g3	290.515	19.2314	3.91708	0	0	up
TRINITY_DN3732_c3_g1	2.44729	386.735	-7.30402	0	0	down
TRINITY_DN3646_c1_g1	183.481	664.379	-1.85638	0	0	down
TRINITY_DN3642_c1_g1	63.4428	401.036	-2.6602	0	0	down
TRINITY_DN1143_c0_g1	714.143	173.065	2.0449	0	0	up
TRINITY_DN3267_c1_g2	58.1189	320.604	-2.46371	0	0	down
TRINITY_DN3415_c0_g2	99.5628	405.254	-2.02515	0	0	down
TRINITY_DN2872_c0_g1	142.638	597.941	-2.06764	0	0	down
TRINITY_DN3426_c1_g2	409.583	124.395	1.71922	0	0	up
TRINITY_DN2556_c5_g1	442.534	114.701	1.94792	0	0	up
TRINITY_DN3575_c5_g3	51.8054	285.635	-2.463	0	0	down
TRINITY_DN3254_c4_g5	42.687	413.229	-3.27507	0	0	down
TRINITY_DN3609_c3_g2	36.2457	140.411	-1.95377	0	0	down
TRINITY_DN2554_c1_g2	49.4327	274.923	-2.47549	0	0	down
TRINITY_DN2857_c2_g2	1203.59	369.834	1.70239	0	0	up
TRINITY_DN3741_c1_g1	40.0462	211.206	-2.39892	0	0	down
TRINITY_DN1995_c0_g1	490.002	54.4836	3.1689	0	0	up
TRINITY_DN2912_c1_g7	265.423	49.2106	2.43125	0	0	up
TRINITY_DN3540_c3_g1	23.4043	137.048	-2.54983	0	0	down
TRINITY_DN2633_c1_g2	221.334	31.0032	2.83574	0	0	up
TRINITY_DN3614_c1_g3	1115.62	393.266	1.50427	0	0	up
TRINITY_DN3542_c0_g5	183.33	537.024	-1.55054	0	0	down
TRINITY_DN3360_c3_g1	19.6247	173.652	-3.14546	0	0	down
TRINITY_DN2212_c0_g1	859.934	167.646	2.35881	0	0	up
TRINITY_DN1547_c0_g1	479.898	97.7425	2.29567	0	0	up
TRINITY_DN1827_c0_g1	259.6	32.4025	3.00211	0	0	up
TRINITY_DN3712_c0_g2	77.1513	282.376	-1.87186	0	0	down
TRINITY_DN2953_c0_g3	52.2897	403.745	-2.94885	0	0	down
TRINITY_DN3003_c0_g3	258.234	954.878	-1.88664	0	0	down
TRINITY_DN785_c0_g1	5144.86	1886.1	1.44773	0	0	up
TRINITY_DN3419_c0_g1	5622.83	2161.02	1.37959	0	0	up
TRINITY_DN3070_c1_g3	7833.39	3561.2	1.13727	0	0	up
TRINITY_DN3314_c2_g1	166.245	30.9223	2.42659	0	0	up
TRINITY_DN2854_c3_g2	498.112	177.887	1.48551	0	0	up
TRINITY_DN3028_c1_g1	343.517	58.7767	2.54706	0	0	up
TRINITY_DN2967_c4_g2	869.062	363.499	1.25751	0	0	up
TRINITY_DN3530_c0_g1	144.408	649.157	-2.16842	0	0	down
TRINITY_DN3573_c1_g6	74.2156	403.558	-2.44298	0	0	down
TRINITY_DN3504_c2_g1	183.813	684.401	-1.8966	0	0	down
TRINITY_DN3257_c0_g1	79.7704	397.71	-2.31779	0	0	down
TRINITY_DN3523_c4_g1	238.523	66.9138	1.83376	0	0	up
TRINITY_DN2600_c1_g2	5.49941	102.143	-4.21517	0	0	down
TRINITY_DN2557_c1_g1	70.6416	331.508	-2.23045	0	0	down
TRINITY_DN1214_c0_g1	267.153	1659.45	-2.63497	0	0	down
TRINITY_DN2653_c1_g3	0.595959	120.355	-7.65787	0	0	down
TRINITY_DN3385_c1_g1	29.2689	164.081	-2.48697	0	0	down
TRINITY_DN3681_c0_g7	308.146	22.1092	3.80089	0	0	up
TRINITY_DN3246_c4_g1	40.1422	176.3	-2.13484	0	0	down
TRINITY_DN1699_c0_g1	631.394	141.161	2.1612	0	0	up
TRINITY_DN3026_c2_g1	106.377	8.19171	3.69888	0	0	up
TRINITY_DN1868_c0_g1	635.855	202.65	1.64971	0	0	up
TRINITY_DN2726_c0_g1	42.9606	266.205	-2.63145	0	0	down
TRINITY_DN2674_c2_g6	79.2036	492.424	-2.63626	0	0	down
TRINITY_DN2866_c2_g5	1011.41	468.471	1.11033	0	0	up
TRINITY_DN2880_c3_g1	545.005	153.061	1.83216	0	0	up
TRINITY_DN3062_c1_g1	58.0943	213.808	-1.87985	0	0	down
TRINITY_DN3584_c1_g3	685.097	157.141	2.12425	0	0	up
TRINITY_DN2902_c5_g4	2.32722	375.512	-7.33411	0	0	down
TRINITY_DN1850_c0_g1	164.647	560.199	-1.76657	0	0	down
TRINITY_DN3190_c0_g1	375.761	159.634	1.23505	0	0	up
TRINITY_DN3284_c1_g1	40.6157	330.921	-3.02638	0	0	down
TRINITY_DN3548_c1_g4	1711.91	734.926	1.21994	0	0	up
TRINITY_DN3372_c3_g2	365.796	120.764	1.59885	0	0	up
TRINITY_DN2645_c2_g5	232.659	700.681	-1.59054	0	0	down
TRINITY_DN1595_c0_g1	631.124	168.079	1.90878	0	0	up
TRINITY_DN3722_c1_g3	95.094	384.607	-2.01596	0	0	down
TRINITY_DN1434_c0_g1	990.076	209.619	2.23977	0	0	up
TRINITY_DN3159_c3_g1	58.7151	319.947	-2.44603	0	0	down
TRINITY_DN3051_c1_g3	773.185	373.179	1.05095	0	0	up
TRINITY_DN3294_c3_g1	144.278	38.1885	1.91764	0	0	up
TRINITY_DN2972_c2_g2	299.967	82.1875	1.86781	0	0	up
TRINITY_DN3569_c7_g2	528.637	167.532	1.65784	0	0	up
TRINITY_DN2928_c0_g1	926.589	312.894	1.56626	0	0	up
TRINITY_DN3193_c4_g1	52.6297	182.221	-1.79174	0	0	down
TRINITY_DN2822_c1_g3	523.047	136.542	1.9376	0	0	up
TRINITY_DN2623_c5_g1	839.3	1892.45	-1.173	0	0	down
TRINITY_DN3355_c1_g3	35.6597	234.784	-2.71897	0	0	down
TRINITY_DN3539_c3_g1	43.9954	145.938	-1.72993	0	0	down
TRINITY_DN3565_c0_g1	22.0604	176.219	-2.99784	0	0	down
TRINITY_DN1457_c0_g1	1106.22	327.781	1.75484	0	0	up
TRINITY_DN1510_c0_g1	865.838	217.107	1.99569	0	0	up
TRINITY_DN1640_c0_g1	715.873	162.739	2.13714	0	0	up
TRINITY_DN2687_c1_g4	301.596	148.287	1.02423	0	0	up
TRINITY_DN2653_c0_g1	144.917	506.229	-1.80456	0	0	down
TRINITY_DN2687_c1_g6	53.9652	214.575	-1.99138	0	0	down
TRINITY_DN3758_c1_g6	403.502	52.5937	2.93961	0	0	up
TRINITY_DN2437_c1_g1	321.662	57.8981	2.47396	0	0	up
TRINITY_DN3553_c2_g2	142.841	465.252	-1.7036	0	0	down
TRINITY_DN2200_c0_g1	26.8637	202.493	-2.91414	0	0	down
TRINITY_DN2891_c2_g1	186.733	50.8468	1.87675	0	0	up
TRINITY_DN2675_c1_g1	81.5864	298.254	-1.87014	0	0	down
TRINITY_DN1766_c0_g1	535.84	237.558	1.17352	0	0	up
TRINITY_DN3557_c1_g2	130.121	515.519	-1.98617	0	0	down
TRINITY_DN3702_c1_g3	75.9702	214.6	-1.49814	0	0	down
TRINITY_DN1873_c0_g1	52.1282	303.953	-2.54371	0	0	down
TRINITY_DN3327_c3_g3	248.219	0.805828	8.26693	0	0	up
TRINITY_DN3471_c4_g1	733.763	195.601	1.9074	0	0	up
TRINITY_DN3617_c0_g5	345.635	147.388	1.22963	0	0	up
TRINITY_DN3102_c1_g1	12.439	85.6363	-2.78336	0	0	down
TRINITY_DN3614_c1_g5	479.128	140.874	1.766	0	0	up
TRINITY_DN3034_c4_g1	26.9245	137.064	-2.34785	0	0	down
TRINITY_DN3223_c0_g1	46.3184	196.592	-2.08554	0	0	down
TRINITY_DN3668_c1_g1	435.988	124.886	1.80368	0	0	up
TRINITY_DN3734_c1_g1	3.84333	36.3123	-3.24003	0	0	down
TRINITY_DN3492_c0_g2	37.5285	197.205	-2.39364	0	0	down
TRINITY_DN2511_c6_g1	75.9879	325.982	-2.10095	0	0	down
TRINITY_DN2766_c0_g1	664.541	226.775	1.55109	0	0	up
TRINITY_DN3417_c0_g2	568.361	146.3	1.95788	0	0	up
TRINITY_DN1852_c0_g1	281.398	63.5476	2.1467	0	0	up
TRINITY_DN2744_c3_g4	45.4218	204.013	-2.1672	0	0	down
TRINITY_DN1678_c0_g1	903.004	204.174	2.14493	0	0	up
TRINITY_DN2859_c0_g1	150.398	43.8398	1.77847	0	0	up
TRINITY_DN2699_c2_g2	281.875	26.1073	3.43253	0	0	up
TRINITY_DN1661_c0_g1	286.976	73.3408	1.96824	0	0	up
TRINITY_DN3632_c0_g2	10.8876	244.726	-4.49041	0	0	down
TRINITY_DN3002_c7_g2	393.836	79.3286	2.31168	0	0	up
TRINITY_DN2554_c1_g1	86.6836	302.059	-1.801	0	0	down
TRINITY_DN3661_c1_g4	49.921	297.469	-2.57502	0	0	down
TRINITY_DN2904_c0_g1	30.9648	141.868	-2.19585	0	0	down
TRINITY_DN2499_c1_g1	40.7253	138.579	-1.76671	0	0	down
TRINITY_DN3164_c0_g1	169.237	770.444	-2.18665	0	0	down
TRINITY_DN3487_c1_g2	637.583	158.548	2.00769	0	0	up
TRINITY_DN3733_c1_g2	78.5083	341.726	-2.12192	0	0	down
TRINITY_DN3660_c2_g1	32.4164	120.125	-1.88974	0	0	down
TRINITY_DN2523_c4_g4	17.8097	171.762	-3.26968	0	0	down
TRINITY_DN3409_c1_g1	157.23	404.599	-1.36362	0	0	down
TRINITY_DN2803_c0_g4	296.843	139.771	1.08663	0	0	up
TRINITY_DN2376_c0_g2	437.105	176.951	1.30463	0	0	up
TRINITY_DN2641_c5_g4	174.233	713.207	-2.03331	0	0	down
TRINITY_DN3381_c2_g1	411.828	92.0412	2.16169	0	0	up
TRINITY_DN2993_c1_g3	29.968	187.783	-2.64757	0	0	down
TRINITY_DN3413_c0_g1	135.76	36.6858	1.88777	0	0	up
TRINITY_DN1902_c0_g1	359.652	144.148	1.31905	0	0	up
TRINITY_DN2586_c0_g6	188.245	52.7738	1.83472	0	0	up
TRINITY_DN2809_c1_g1	354.45	90.4759	1.96998	0	0	up
TRINITY_DN2782_c0_g7	66.378	24.6751	1.42765	0	0	up
TRINITY_DN1316_c0_g1	550.979	122.486	2.16938	0	0	up
TRINITY_DN3330_c2_g3	88.1794	318.636	-1.8534	0	0	down
TRINITY_DN3242_c3_g1	102.446	257.956	-1.33227	0	0	down
TRINITY_DN3051_c2_g1	45.0943	136.221	-1.59494	0	0	down
TRINITY_DN2135_c1_g1	354.795	82.6771	2.10143	0	0	up
TRINITY_DN2396_c0_g1	1.66142	212.9	-7.00161	0	0	down
TRINITY_DN1298_c0_g1	158.642	15.2218	3.38157	0	0	up
TRINITY_DN3681_c0_g5	332.408	1072.21	-1.68956	0	0	down
TRINITY_DN3091_c1_g4	35.3404	175.627	-2.31312	0	0	down
TRINITY_DN2981_c0_g2	155.436	408.865	-1.3953	0	0	down
TRINITY_DN1918_c0_g1	489.673	133.929	1.87035	0	0	up
TRINITY_DN1440_c0_g1	582.09	152.366	1.9337	0	0	up
TRINITY_DN3670_c0_g3	158.747	53.7471	1.56247	0	0	up
TRINITY_DN3526_c2_g3	4.94405	48.2474	-3.28668	0	0	down
TRINITY_DN3424_c4_g3	78.2061	264.578	-1.75834	0	0	down
TRINITY_DN1404_c0_g1	129.571	25.3729	2.35238	0	0	up
TRINITY_DN2377_c0_g2	377.892	146.35	1.36855	0	0	up
TRINITY_DN2996_c3_g2	5.71668	52.9279	-3.21078	0	0	down
TRINITY_DN3621_c3_g1	388.414	86.053	2.1743	0	0	up
TRINITY_DN3209_c1_g1	34.3659	222.436	-2.69434	0	0	down
TRINITY_DN3182_c0_g1	737.752	217.497	1.76214	0	0	up
TRINITY_DN3014_c1_g1	299.28	110.719	1.43459	0	0	up
TRINITY_DN3207_c1_g2	181.052	77.6226	1.22186	0	0	up
TRINITY_DN2556_c3_g2	181.297	54.8041	1.726	0	0	up
TRINITY_DN2927_c2_g1	30.274	173.902	-2.52212	0	0	down
TRINITY_DN1950_c0_g1	173.665	0.994989	7.44741	0	0	up
TRINITY_DN3401_c2_g2	209.675	486.312	-1.21373	0	0	down
TRINITY_DN1530_c0_g1	160.771	851.303	-2.40466	0	0	down
TRINITY_DN3616_c4_g1	11.4957	45.4067	-1.98181	0	0	down
TRINITY_DN3109_c0_g1	15.4664	127.936	-3.04821	0	0	down
TRINITY_DN3627_c0_g4	71.6909	327.586	-2.19201	0	0	down
TRINITY_DN882_c0_g1	784.294	199.316	1.97634	0	0	up
TRINITY_DN1968_c0_g1	89.2529	370.18	-2.05226	0	0	down
TRINITY_DN3149_c0_g2	193.02	64.7929	1.57484	0	0	up
TRINITY_DN2221_c0_g1	22.3174	169.445	-2.92458	0	0	down
TRINITY_DN3158_c1_g1	16.9902	130.025	-2.93602	0	0	down
TRINITY_DN3310_c0_g3	54.3662	189.773	-1.80349	0	0	down
TRINITY_DN3092_c1_g1	132.269	433.862	-1.71376	0	0	down
TRINITY_DN3041_c4_g3	103.408	11.8084	3.13046	0	0	up
TRINITY_DN2671_c0_g1	7.18131	53.88	-2.90743	0	0	down
TRINITY_DN3356_c1_g1	21.0989	141.406	-2.74461	0	0	down
TRINITY_DN3265_c4_g1	90.9872	194.055	-1.09273	0	0	down
TRINITY_DN3132_c1_g1	215.915	49.0476	2.13821	0	0	up
TRINITY_DN3125_c3_g5	90.6179	0.335413	8.07771	0	0	up
TRINITY_DN2727_c2_g2	139.117	19.8786	2.80701	0	0	up
TRINITY_DN1716_c0_g1	142.801	476.448	-1.73831	0	0	down
TRINITY_DN1554_c0_g1	44.8793	159.403	-1.82856	0	0	down
TRINITY_DN2856_c3_g9	73.3487	321.479	-2.13188	0	0	down
TRINITY_DN2953_c0_g1	16.3733	117.397	-2.84198	0	0	down
TRINITY_DN3576_c1_g1	69.4088	4.46842	3.95728	0	0	up
TRINITY_DN2674_c1_g1	8.69018	54.6951	-2.65395	0	0	down
TRINITY_DN2759_c0_g8	179.743	33.9329	2.40518	0	0	up
TRINITY_DN3138_c0_g1	418.521	0.406775	10.0069	0	0	up
TRINITY_DN3041_c0_g2	19.3607	162.114	-3.06581	0	0	down
TRINITY_DN2869_c1_g1	9.61735	101.691	-3.40241	0	0	down
TRINITY_DN2832_c3_g1	19.3667	89.078	-2.20149	0	0	down
TRINITY_DN2774_c0_g3	392.897	184.656	1.08931	0	0	up
TRINITY_DN2958_c0_g2	79.247	335.755	-2.08298	0	0	down
TRINITY_DN2775_c0_g2	78.4886	3.16742	4.6311	0	0	up
TRINITY_DN3039_c1_g3	594.873	192.93	1.6245	0	0	up
TRINITY_DN3250_c0_g2	6.54605	58.7238	-3.16525	0	0	down
TRINITY_DN2899_c0_g3	290.866	700.77	-1.26859	0	0	down
TRINITY_DN3176_c0_g1	51.2125	187.746	-1.87421	0	0	down
TRINITY_DN3281_c2_g1	93.8392	297.277	-1.66355	0	0	down
TRINITY_DN2882_c2_g4	44.1236	151.074	-1.77563	0	0	down
TRINITY_DN2504_c1_g6	190.849	20.3594	3.22866	0	0	up
TRINITY_DN3384_c0_g4	182.809	79.6039	1.19943	0	0	up
TRINITY_DN1762_c0_g1	496.685	204.801	1.27811	0	0	up
TRINITY_DN3719_c1_g2	207.199	68.2993	1.60107	0	0	up
TRINITY_DN2792_c3_g3	328.276	992.211	-1.59574	0	0	down
TRINITY_DN3533_c3_g3	227.651	66.328	1.77913	0	0	up
TRINITY_DN2640_c2_g6	42.528	230.939	-2.44103	0	0	down
TRINITY_DN2948_c4_g3	141.779	441.849	-1.6399	0	0	down
TRINITY_DN2758_c1_g1	101.265	44.5701	1.18399	0	0	up
TRINITY_DN3463_c3_g2	242.592	91.3045	1.40977	0	0	up
TRINITY_DN3366_c1_g1	723.647	238.466	1.6015	0	0	up
TRINITY_DN2602_c0_g1	473.154	161.679	1.54918	0	0	up
TRINITY_DN3077_c1_g3	48.5564	154.813	-1.67279	0	0	down
TRINITY_DN2955_c0_g3	1010.62	489.17	1.04683	0	0	up
TRINITY_DN2860_c1_g1	412.954	159.407	1.37327	0	0	up
TRINITY_DN1866_c0_g1	147.555	28.8875	2.35273	0	0	up
TRINITY_DN2700_c2_g1	187.846	74.9438	1.32567	0	0	up
TRINITY_DN3699_c2_g3	12.0231	70.4838	-2.55148	0	0	down
TRINITY_DN3310_c0_g4	148.468	28.7752	2.36726	0	0	up
TRINITY_DN3394_c2_g2	277.147	68.9524	2.00698	0	0	up
TRINITY_DN3371_c7_g1	132.957	307.014	-1.20735	0	0	down
TRINITY_DN3409_c2_g5	11.6148	118.617	-3.35227	0	0	down
TRINITY_DN3107_c0_g1	429.417	194.494	1.14265	0	0	up
TRINITY_DN3634_c5_g2	32.1201	86.7809	-1.4339	0	0	down
TRINITY_DN3703_c4_g4	188.509	41.9313	2.16854	0	0	up
TRINITY_DN3447_c1_g2	261.22	647.036	-1.30858	0	0	down
TRINITY_DN2345_c0_g1	172.345	433.229	-1.32983	0	0	down
TRINITY_DN3537_c3_g1	69.8737	265.368	-1.92518	0	0	down
TRINITY_DN3328_c3_g2	34.9895	128.672	-1.87871	0	0	down
TRINITY_DN2806_c0_g1	59.6117	259.125	-2.11998	0	0	down
TRINITY_DN3160_c3_g3	42.0058	149.476	-1.83125	0	0	down
TRINITY_DN3188_c0_g1	118.421	38.461	1.62246	0	0	up
TRINITY_DN3663_c2_g6	21.3502	163.376	-2.93588	0	0	down
TRINITY_DN3566_c1_g2	282.045	713.501	-1.33899	0	0	down
TRINITY_DN3068_c0_g1	386.523	80.2188	2.26854	0	0	up
TRINITY_DN2690_c1_g2	193.94	80.8319	1.26261	0	0	up
TRINITY_DN3118_c6_g2	144.567	34.6502	2.0608	0	0	up
TRINITY_DN3105_c0_g1	181.755	544.724	-1.58354	0	0	down
TRINITY_DN2955_c0_g6	55.1796	163.868	-1.57032	0	0	down
TRINITY_DN2506_c2_g2	31.7798	138.177	-2.12034	0	0	down
TRINITY_DN2851_c1_g3	134.571	54.2951	1.30948	0	0	up
TRINITY_DN3605_c1_g1	30.0268	112.247	-1.90235	0	0	down
TRINITY_DN2342_c0_g1	4.59438	67.6291	-3.8797	0	0	down
TRINITY_DN3380_c3_g3	516.318	179.447	1.5247	0	0	up
TRINITY_DN2689_c0_g2	47.9818	178.51	-1.89545	0	0	down
TRINITY_DN3064_c0_g5	209.131	571.786	-1.45107	0	0	down
TRINITY_DN2607_c1_g2	113.098	23.4792	2.26812	0	0	up
TRINITY_DN3375_c3_g6	64.2363	253.162	-1.9786	0	0	down
TRINITY_DN3248_c2_g3	330.508	56.0084	2.56097	0	0	up
TRINITY_DN3443_c0_g2	32.2607	184.346	-2.51456	0	0	down
TRINITY_DN2471_c0_g1	244.418	604.531	-1.30647	0	0	down
TRINITY_DN3352_c1_g1	264.42	616.867	-1.22213	0	0	down
TRINITY_DN3708_c0_g1	34.3529	81.3579	-1.24385	0	0	down
TRINITY_DN969_c0_g1	712.666	254.239	1.48704	0	0	up
TRINITY_DN1155_c0_g1	357.177	122.115	1.5484	0	0	up
TRINITY_DN2687_c1_g7	218.953	42.1381	2.37742	0	0	up
TRINITY_DN3009_c2_g1	6.97142	67.2981	-3.27104	0	0	down
TRINITY_DN2107_c0_g1	231.591	77.1417	1.58599	0	0	up
TRINITY_DN3034_c3_g2	31.9191	220.562	-2.7887	0	0	down
TRINITY_DN2938_c0_g3	70.6457	142.612	-1.01342	0	0	down
TRINITY_DN2690_c3_g2	121.242	60.0983	1.01249	0	0	up
TRINITY_DN2865_c0_g1	290.731	79.8752	1.86386	0	0	up
TRINITY_DN3245_c3_g1	22.8241	102.68	-2.16953	0	0	down
TRINITY_DN2952_c0_g1	249.927	120.196	1.05611	0	0	up
TRINITY_DN1634_c0_g1	270.165	103.558	1.3834	0	0	up
TRINITY_DN2822_c1_g1	277.092	116.961	1.24434	0	0	up
TRINITY_DN3031_c2_g1	94.6048	279.741	-1.5641	0	0	down
TRINITY_DN2623_c4_g2	345.506	171.906	1.00709	0	0	up
TRINITY_DN3053_c0_g1	65.42	170.282	-1.38012	0	0	down
TRINITY_DN3159_c4_g2	131.653	22.9225	2.5219	0	0	up
TRINITY_DN2593_c0_g5	94.4272	233.58	-1.30664	0	0	down
TRINITY_DN3571_c2_g1	227.563	488.114	-1.10095	0	0	down
TRINITY_DN2530_c2_g2	30.0689	70.6271	-1.23195	0	0	down
TRINITY_DN3748_c2_g3	17.654	58.9584	-1.7397	0	0	down
TRINITY_DN3722_c1_g1	93.0339	188.924	-1.02198	0	0	down
TRINITY_DN2594_c2_g4	165.697	401.099	-1.27541	0	0	down
TRINITY_DN3159_c4_g1	268.082	108.303	1.3076	0	0	up
TRINITY_DN2226_c0_g1	17.5502	124.963	-2.83193	0	0	down
TRINITY_DN2982_c1_g3	337.851	64.5642	2.38758	0	0	up
TRINITY_DN1819_c0_g1	201.459	52.8318	1.93101	0	0	up
TRINITY_DN2594_c2_g2	100.237	283.875	-1.50184	0	0	down
TRINITY_DN3106_c3_g2	82.5186	11.5273	2.83966	0	0	up
TRINITY_DN2192_c0_g1	331.6	781.243	-1.23633	0	0	down
TRINITY_DN2884_c0_g1	40.0279	134.777	-1.75149	0	0	down
TRINITY_DN2853_c1_g2	47.5153	153.889	-1.69543	0	0	down
TRINITY_DN3381_c5_g1	125.603	312.05	-1.3129	0	0	down
TRINITY_DN1655_c0_g1	27.548	122.785	-2.15611	0	0	down
TRINITY_DN3644_c0_g8	14.6335	84.2584	-2.52554	0	0	down
TRINITY_DN2335_c0_g1	57.3901	0.17361	8.36881	0	0	up
TRINITY_DN3602_c4_g2	12.0878	93.7536	-2.95533	0	0	down
TRINITY_DN3213_c2_g1	28.1898	79.0008	-1.48669	0	0	down
TRINITY_DN3541_c2_g1	216.843	468.163	-1.11036	0	0	down
TRINITY_DN2783_c2_g1	188.779	599.439	-1.66692	0	0	down
TRINITY_DN2916_c4_g1	22.4024	82.2095	-1.87565	0	0	down
TRINITY_DN2725_c0_g1	36.2682	131.092	-1.8538	0	0	down
TRINITY_DN2576_c0_g5	75.4409	356.725	-2.24139	0	0	down
TRINITY_DN2559_c5_g1	0.284806	87.2071	-8.25832	0	0	down
TRINITY_DN3237_c2_g3	15.2022	96.3683	-2.66428	0	0	down
TRINITY_DN3039_c2_g1	96.7146	226.176	-1.22564	0	0	down
TRINITY_DN3327_c0_g1	66.9651	0.35296	7.56776	0	0	up
TRINITY_DN3208_c3_g5	18.5103	85.5882	-2.20908	0	0	down
TRINITY_DN1764_c0_g1	98.6889	19.4148	2.34573	0	0	up
TRINITY_DN90_c0_g1	481.352	137.104	1.81182	0	0	up
TRINITY_DN2574_c0_g1	104.194	34.7644	1.58359	0	0	up
TRINITY_DN2640_c1_g2	304.874	112.926	1.43283	0	0	up
TRINITY_DN2895_c2_g1	36.51	152.455	-2.06202	0	0	down
TRINITY_DN3101_c3_g2	45.3836	179.935	-1.98723	0	0	down
TRINITY_DN2881_c4_g1	36.2268	158.825	-2.13231	0	0	down
TRINITY_DN3621_c0_g1	35.0296	124.468	-1.82912	0	0	down
TRINITY_DN3608_c2_g1	319.782	137.373	1.21899	0	0	up
TRINITY_DN1724_c0_g1	356.725	154.262	1.20943	0	0	up
TRINITY_DN2844_c2_g2	254.647	86.2034	1.56268	0	0	up
TRINITY_DN2446_c0_g1	215.796	0.0367448	12.5198	0	0	up
TRINITY_DN3727_c3_g1	12.2456	49.3859	-2.01184	0	0	down
TRINITY_DN3417_c4_g1	53.7296	156.214	-1.53973	0	0	down
TRINITY_DN3105_c1_g1	116.649	265.211	-1.18496	0	0	down
TRINITY_DN3295_c3_g1	43.2018	268.744	-2.63707	0	0	down
TRINITY_DN1841_c0_g1	274.775	59.4264	2.20908	0	0	up
TRINITY_DN2924_c3_g5	219.516	71.5964	1.61637	0	0	up
TRINITY_DN3042_c4_g3	180.046	59.4879	1.5977	0	0	up
TRINITY_DN2851_c1_g2	104.231	20.8793	2.31965	0	0	up
TRINITY_DN3586_c0_g1	231.538	494.139	-1.09367	0	0	down
TRINITY_DN2698_c1_g1	104.688	257.947	-1.30098	0	0	down
TRINITY_DN1899_c0_g1	188.186	59.8479	1.65279	0	0	up
TRINITY_DN2848_c4_g1	19.8432	87.2211	-2.13604	0	0	down
TRINITY_DN3192_c2_g2	56.8913	152.878	-1.4261	0	0	down
TRINITY_DN3507_c3_g1	112.327	48.2781	1.21827	0	0	up
TRINITY_DN2768_c3_g3	434.265	997.128	-1.1992	0	0	down
TRINITY_DN2723_c1_g1	88.2316	41.6885	1.08165	0	0	up
TRINITY_DN1393_c0_g2	248.692	66.9035	1.89421	0	0	up
TRINITY_DN2487_c0_g3	37.4602	191.563	-2.35438	0	0	down
TRINITY_DN3495_c0_g2	54.2364	203.605	-1.90844	0	0	down
TRINITY_DN2809_c2_g1	105.611	248.073	-1.232	0	0	down
TRINITY_DN3452_c2_g4	14.7617	103.27	-2.80649	0	0	down
TRINITY_DN2642_c2_g1	143.388	329.436	-1.20008	0	0	down
TRINITY_DN3475_c0_g1	335.979	160.363	1.06703	0	0	up
TRINITY_DN3309_c3_g1	2.63139	49.4892	-4.23322	0	0	down
TRINITY_DN2978_c0_g1	180.048	64.9515	1.47094	0	0	up
TRINITY_DN3454_c0_g1	19.4827	93.2586	-2.25904	0	0	down
TRINITY_DN3494_c3_g1	75.5401	195.94	-1.3751	0	0	down
TRINITY_DN2987_c1_g1	12.0946	88.9247	-2.87822	0	0	down
TRINITY_DN3094_c2_g2	101.806	36.6562	1.47369	0	0	up
TRINITY_DN3361_c4_g3	38.1335	146.785	-1.94457	0	0	down
TRINITY_DN1851_c0_g1	235.631	747.58	-1.6657	0	0	down
TRINITY_DN3424_c3_g1	455.216	1009.33	-1.14877	0	0	down
TRINITY_DN3667_c2_g1	122.715	271.25	-1.14431	0	0	down
TRINITY_DN3417_c2_g2	42.8197	0.769654	5.79792	0	0	up
TRINITY_DN2575_c4_g1	65.6148	142.825	-1.12216	0	0	down
TRINITY_DN2443_c0_g1	73.2993	188.386	-1.36182	0	0	down
TRINITY_DN3260_c4_g2	13.7345	94.9222	-2.78894	0	0	down
TRINITY_DN3594_c6_g1	192.91	93.9867	1.0374	0	0	up
TRINITY_DN3538_c3_g3	35.3981	126.469	-1.83704	0	0	down
TRINITY_DN2448_c0_g1	129.622	55.2564	1.2301	0	0	up
TRINITY_DN2783_c1_g2	56.4156	186.252	-1.72309	0	0	down
TRINITY_DN3261_c1_g3	245.296	92.0645	1.41381	0	0	up
TRINITY_DN1217_c0_g1	39.8899	157.588	-1.98206	0	0	down
TRINITY_DN3381_c5_g2	100.861	303.857	-1.59103	0	0	down
TRINITY_DN2892_c1_g4	111.185	49.4934	1.16765	0	0	up
TRINITY_DN3333_c0_g1	47.2272	178.891	-1.92139	0	0	down
TRINITY_DN3549_c1_g2	93.4206	233.296	-1.32035	0	0	down
TRINITY_DN3005_c0_g1	62.718	140.057	-1.15907	0	0	down
TRINITY_DN3239_c0_g1	20.8666	85.155	-2.0289	0	0	down
TRINITY_DN3234_c4_g2	36.3383	164.781	-2.18099	0	0	down
TRINITY_DN2697_c0_g1	506.345	219.224	1.20772	0	0	up
TRINITY_DN2110_c0_g2	101.575	259.812	-1.35493	0	0	down
TRINITY_DN1327_c0_g1	521.494	259.386	1.00755	0	0	up
TRINITY_DN2862_c0_g1	20.362	111.702	-2.45571	0	0	down
TRINITY_DN1305_c0_g1	276.498	112.339	1.29941	0	0	up
TRINITY_DN2950_c3_g3	4.95793	37.5473	-2.9209	0	0	down
TRINITY_DN3629_c1_g2	265.926	69.9525	1.92658	0	0	up
TRINITY_DN3452_c2_g1	61.6071	234.905	-1.93091	0	0	down
TRINITY_DN2846_c8_g4	25.1783	168.829	-2.74531	0	0	down
TRINITY_DN2783_c1_g1	56.085	172.085	-1.61743	0	0	down
TRINITY_DN3427_c3_g2	124.075	42.6551	1.54042	0	0	up
TRINITY_DN3214_c0_g1	24.2628	137.973	-2.50757	0	0	down
TRINITY_DN3118_c6_g1	50.2938	223.511	-2.15189	0	0	down
TRINITY_DN1494_c0_g1	68.3933	312.658	-2.19266	0	0	down
TRINITY_DN3503_c4_g1	36.2658	116.616	-1.68508	0	0	down
TRINITY_DN2638_c4_g2	18.1784	74.0701	-2.02667	0	0	down
TRINITY_DN3070_c1_g1	222.175	106.877	1.05575	0	0	up
TRINITY_DN2786_c2_g3	31.5638	110.067	-1.80203	0	0	down
TRINITY_DN2574_c0_g3	198.578	98.3424	1.01382	0	0	up
TRINITY_DN3413_c0_g3	1556.57	515.796	1.5935	0	0	up
TRINITY_DN2949_c0_g1	104.058	215.654	-1.05133	0	0	down
TRINITY_DN3480_c0_g8	23.6899	456.704	-4.26892	0	0	down
TRINITY_DN3055_c1_g3	86.1899	240.17	-1.47847	0	0	down
TRINITY_DN2250_c0_g1	162.772	80.3061	1.01927	0	0	up
TRINITY_DN2827_c2_g1	25.877	97.0504	-1.90706	0	0	down
TRINITY_DN3386_c3_g1	47.1956	158.467	-1.74746	0	0	down
TRINITY_DN3095_c7_g1	13.4014	90.5814	-2.75683	0	0	down
TRINITY_DN3047_c3_g1	110.836	32.5328	1.76846	0	0	up
TRINITY_DN3314_c1_g1	20.0257	159.21	-2.99101	0	0	down
TRINITY_DN2573_c3_g4	167.681	578.852	-1.78747	0	0	down
TRINITY_DN1193_c0_g1	15.0373	261.277	-4.11896	0	0	down
TRINITY_DN2519_c0_g1	86.2378	310.267	-1.84712	0	0	down
TRINITY_DN2541_c0_g2	206.379	95.9416	1.10507	0	0	up
TRINITY_DN2920_c0_g5	6.58385	93.0461	-3.82094	0	0	down
TRINITY_DN3685_c3_g3	44.3221	148.031	-1.7398	0	0	down
TRINITY_DN2582_c3_g2	101.646	25.3127	2.00562	0	0	up
TRINITY_DN3173_c0_g1	35.9137	1.12289	4.99925	0	0	up
TRINITY_DN2558_c3_g3	203.153	485.087	-1.25568	0	0	down
TRINITY_DN2961_c1_g3	154.521	62.1091	1.31493	0	0	up
TRINITY_DN2973_c2_g2	19.2476	89.8033	-2.22209	0	0	down
TRINITY_DN3619_c0_g1	275.007	49.3562	2.47817	0	0	up
TRINITY_DN1822_c0_g2	200.899	38.4878	2.384	0	0	up
TRINITY_DN3106_c3_g4	2913.78	1416.42	1.04064	0	0	up
TRINITY_DN1916_c0_g1	4.32078	48.8045	-3.49765	0	0	down
TRINITY_DN2488_c2_g1	50.4863	122.907	-1.2836	0	0	down
TRINITY_DN2456_c5_g5	477.815	104.261	2.19626	0	0	up
TRINITY_DN2514_c3_g2	38.5005	104.548	-1.44121	0	0	down
TRINITY_DN3205_c4_g2	54.3344	8.18503	2.73081	0	0	up
TRINITY_DN3255_c1_g5	67.5809	294.488	-2.12352	0	0	down
TRINITY_DN3177_c0_g1	32.2693	141.564	-2.13322	0	0	down
TRINITY_DN3313_c6_g4	59.5612	13.7223	2.11785	0	0	up
TRINITY_DN3058_c3_g2	34.4976	103.78	-1.58896	0	0	down
TRINITY_DN2005_c0_g1	264.197	89.6533	1.55919	0	0	up
TRINITY_DN2930_c2_g2	24.7054	100.955	-2.03081	0	0	down
TRINITY_DN2548_c5_g1	218.759	73.9112	1.56548	0	0	up
TRINITY_DN2727_c2_g7	364.044	125.354	1.53811	0	0	up
TRINITY_DN2477_c0_g1	92.1852	32.9186	1.48563	0	0	up
TRINITY_DN2086_c0_g1	13.1762	73.5803	-2.48138	0	0	down
TRINITY_DN3455_c4_g2	70.4184	1.83726	5.26033	0	0	up
TRINITY_DN3625_c2_g1	10.9773	77.8419	-2.82603	0	0	down
TRINITY_DN2959_c1_g5	32.5584	120.546	-1.88848	0	0	down
TRINITY_DN2833_c2_g4	59.8149	146.939	-1.29664	0	0	down
TRINITY_DN2543_c7_g1	44.2243	2.50342	4.14287	0	0	up
TRINITY_DN2204_c0_g1	234.409	483.709	-1.04511	0	0	down
TRINITY_DN2777_c5_g2	45.6006	119.155	-1.38571	0	0	down
TRINITY_DN3352_c1_g3	23.3233	85.9014	-1.88091	0	0	down
TRINITY_DN3591_c3_g2	48.7379	123.003	-1.33557	0	0	down
TRINITY_DN3663_c2_g4	64.3999	181.152	-1.49207	0	0	down
TRINITY_DN3209_c0_g1	104.25	32.4369	1.68434	0	0	up
TRINITY_DN2852_c2_g2	19.0525	75.2398	-1.98152	0	0	down
TRINITY_DN3179_c2_g1	81.8004	351.421	-2.10302	0	0	down
TRINITY_DN1139_c0_g1	15.3909	134.132	-3.1235	0	0	down
TRINITY_DN1291_c0_g1	199.373	40.8987	2.28534	0	0	up
TRINITY_DN3405_c2_g1	23.5194	70.4233	-1.5822	0	0	down
TRINITY_DN3739_c1_g1	58.2382	21.6291	1.42899	0	0	up
TRINITY_DN3505_c2_g1	17.6615	76.5018	-2.11488	0	0	down
TRINITY_DN2638_c4_g1	26.884	103.376	-1.94309	0	0	down
TRINITY_DN2985_c1_g1	160.14	42.7108	1.90666	0	0	up
TRINITY_DN3568_c1_g5	51.2925	286.609	-2.48226	0	0	down
TRINITY_DN2915_c1_g1	41.2412	308.761	-2.90433	0	0	down
TRINITY_DN3072_c0_g1	34.1437	7.84393	2.12197	0	0	up
TRINITY_DN3487_c0_g5	44.2907	149.779	-1.75776	0	0	down
TRINITY_DN3683_c6_g1	22.7209	198.467	-3.12681	0	0	down
TRINITY_DN3474_c1_g1	50.792	139.081	-1.45325	0	0	down
TRINITY_DN3061_c5_g1	6.2099	60.2431	-3.27816	0	0	down
TRINITY_DN3302_c2_g2	86.6977	229.008	-1.40133	0	0	down
TRINITY_DN2542_c4_g3	129.521	321.652	-1.31232	0	0	down
TRINITY_DN2270_c0_g1	78.57	26.7367	1.55516	0	0	up
TRINITY_DN3286_c3_g5	74.5518	165.238	-1.14823	0	0	down
TRINITY_DN3431_c4_g3	95.4124	195.233	-1.03295	0	0	down
TRINITY_DN1912_c0_g1	95.49	30.7149	1.63641	0	0	up
TRINITY_DN3231_c3_g1	33.6332	145.311	-2.11119	0	0	down
TRINITY_DN3588_c0_g3	11.9367	55.8732	-2.22676	0	0	down
TRINITY_DN3090_c1_g2	64.5089	181.384	-1.49148	0	0	down
TRINITY_DN3269_c1_g2	97.1388	220.979	-1.18579	0	0	down
TRINITY_DN3340_c1_g1	31.9506	122.056	-1.93363	0	0	down
TRINITY_DN2964_c0_g1	65.0988	144.49	-1.15027	0	0	down
TRINITY_DN1633_c0_g1	75.1243	251.323	-1.74219	0	0	down
TRINITY_DN3550_c1_g2	33.8823	82.4143	-1.28236	0	0	down
TRINITY_DN2613_c2_g1	72.2414	175.064	-1.27699	0	0	down
TRINITY_DN3245_c2_g2	119.199	52.8176	1.17428	0	0	up
TRINITY_DN2872_c0_g3	93.135	1.39933	6.05651	0	0	up
TRINITY_DN2884_c1_g1	24.7822	94.5355	-1.93155	0	0	down
TRINITY_DN3648_c1_g4	199.2	418.578	-1.07128	0	0	down
TRINITY_DN3185_c3_g1	58.8881	150.343	-1.35221	0	0	down
TRINITY_DN3657_c4_g3	46.7703	166.024	-1.82773	0	0	down
TRINITY_DN2966_c0_g1	16.8751	104.504	-2.63059	0	0	down
TRINITY_DN996_c0_g1	225.563	68.1934	1.72583	0	0	up
TRINITY_DN3006_c2_g1	11.4217	59.9126	-2.39108	0	0	down
TRINITY_DN3672_c7_g2	60.1938	147.377	-1.29182	0	0	down
TRINITY_DN2568_c0_g1	32.902	134.529	-2.03167	0	0	down
TRINITY_DN3379_c3_g2	91.2813	39.5975	1.20491	0	0	up
TRINITY_DN2432_c0_g1	119.769	259.532	-1.11566	0	0	down
TRINITY_DN3588_c0_g4	47.1679	130.369	-1.46673	0	0	down
TRINITY_DN3296_c0_g1	127.906	21.0804	2.60111	0	0	up
TRINITY_DN2807_c2_g1	154.234	41.6357	1.88923	0	0	up
TRINITY_DN3445_c3_g2	73.1005	169.688	-1.21493	0	0	down
TRINITY_DN3688_c0_g1	55.5097	21.4565	1.37133	0	0	up
TRINITY_DN3409_c2_g2	96.23	232.646	-1.27358	0	0	down
TRINITY_DN2965_c2_g5	19.7205	73.0404	-1.889	0	0	down
TRINITY_DN3270_c2_g1	73.7573	162.827	-1.14248	0	0	down
TRINITY_DN3709_c1_g1	142.677	52.4939	1.44253	0	0	up
TRINITY_DN3345_c3_g2	22.5095	89.7823	-1.9959	0	0	down
TRINITY_DN3615_c5_g10	18.5763	69.34	-1.90022	0	0	down
TRINITY_DN1085_c0_g1	141.278	34.5864	2.03026	0	0	up
TRINITY_DN2908_c2_g1	49.3433	215.597	-2.12741	0	0	down
TRINITY_DN3680_c2_g4	83.0225	35.0638	1.24352	0	0	up
TRINITY_DN60_c0_g1	985.433	275.685	1.83774	0	0	up
TRINITY_DN3704_c1_g2	162.529	381.92	-1.23257	0	0	down
TRINITY_DN3395_c4_g6	32.8711	92.479	-1.49231	0	0	down
TRINITY_DN1540_c0_g1	155.294	42.4369	1.87161	0	0	up
TRINITY_DN3554_c5_g1	111.666	48.1959	1.2122	0	0	up
TRINITY_DN3436_c0_g2	449.763	920.865	-1.03383	0	0	down
TRINITY_DN3015_c3_g2	44.3664	12.6076	1.81517	0	0	up
TRINITY_DN2620_c0_g1	364.518	174.988	1.05873	0	0	up
TRINITY_DN2720_c4_g3	63.822	175.474	-1.45913	0	0	down
TRINITY_DN2905_c1_g4	86.7674	14.3835	2.59274	0	0	up
TRINITY_DN3566_c4_g1	38.49	124.398	-1.69241	0	0	down
TRINITY_DN1973_c0_g1	124.083	30.5668	2.02126	0	0	up
TRINITY_DN3342_c2_g2	11.3992	27.6751	-1.27966	0	0	down
TRINITY_DN2638_c2_g1	88.7562	42.1597	1.07398	0	0	up
TRINITY_DN2549_c0_g1	109.382	37.096	1.56004	0	0	up
TRINITY_DN3028_c1_g4	26.6	0.337341	6.30107	0	0	up
TRINITY_DN3063_c1_g2	76.1998	206.554	-1.43866	0	0	down
TRINITY_DN2585_c0_g6	73.2522	30.9965	1.24077	0	0	up
TRINITY_DN3035_c1_g1	85.3909	215.314	-1.33429	0	0	down
TRINITY_DN3319_c3_g2	10.2434	58.2668	-2.50799	0	0	down
TRINITY_DN3352_c0_g1	200.878	96.2303	1.06176	0	0	up
TRINITY_DN2283_c0_g1	101.485	32.1591	1.65797	0	0	up
TRINITY_DN2576_c1_g1	40.763	116.62	-1.51649	0	0	down
TRINITY_DN2841_c2_g2	21.111	87.4034	-2.04969	0	0	down
TRINITY_DN3248_c2_g1	84.6533	37.3443	1.18068	0	0	up
TRINITY_DN3052_c2_g1	34.0029	86.59	-1.34854	0	0	down
TRINITY_DN2420_c0_g1	21.953	131.837	-2.58627	0	0	down
TRINITY_DN3120_c4_g1	55.4186	124.823	-1.17144	0	0	down
TRINITY_DN3637_c2_g1	36.4469	3.93661	3.21077	0	0	up
TRINITY_DN2678_c1_g2	22.5734	56.3163	-1.31893	0	0	down
TRINITY_DN3249_c1_g3	48.55	188.898	-1.96007	0	0	down
TRINITY_DN2991_c6_g2	285.913	576.401	-1.0115	0	0	down
TRINITY_DN1535_c0_g1	192.146	75.981	1.33849	0	0	up
TRINITY_DN3578_c4_g1	115.031	46.501	1.30669	0	0	up
TRINITY_DN3028_c1_g3	119.982	50.8886	1.2374	0	0	up
TRINITY_DN3695_c1_g1	172.66	53.1664	1.69935	0	0	up
TRINITY_DN3364_c4_g1	88.4507	224.801	-1.3457	0	0	down
TRINITY_DN3183_c1_g1	42.2667	98.0717	-1.21431	0	0	down
TRINITY_DN3635_c3_g3	146.953	47.2659	1.63649	0	0	up
TRINITY_DN3023_c1_g1	121.031	49.3357	1.29467	0	0	up
TRINITY_DN3331_c2_g1	11.3849	89.6436	-2.97708	0	0	down
TRINITY_DN1525_c0_g1	220.985	55.9797	1.98097	0	0	up
TRINITY_DN3033_c0_g3	24.9426	62.6635	-1.32902	0	0	down
TRINITY_DN3632_c0_g3	34.5785	145.148	-2.06958	0	0	down
TRINITY_DN2524_c2_g1	12.3739	58.3582	-2.23764	0	0	down
TRINITY_DN3578_c3_g1	18.4409	70.7783	-1.94039	0	0	down
TRINITY_DN2535_c1_g4	32.0511	3.38765	3.24201	0	0	up
TRINITY_DN2171_c0_g1	140.675	339.485	-1.27098	0	0	down
TRINITY_DN3669_c2_g1	84.179	41.6717	1.01439	0	0	up
TRINITY_DN2501_c1_g3	65.899	181.903	-1.46484	0	0	down
TRINITY_DN3017_c0_g5	109.867	232.589	-1.08202	0	0	down
TRINITY_DN3345_c2_g3	44.4422	5.21749	3.0905	0	0	up
TRINITY_DN2613_c4_g2	18.3037	75.4125	-2.04267	0	0	down
TRINITY_DN899_c0_g1	15.9062	127.947	-3.00789	0	0	down
TRINITY_DN3608_c3_g3	20.5375	76.9633	-1.90591	0	0	down
TRINITY_DN3395_c3_g2	41.9635	127.903	-1.60784	0	0	down
TRINITY_DN2515_c0_g1	17.1879	183.082	-3.41303	0	0	down
TRINITY_DN3088_c0_g1	47.0158	8.38567	2.48715	0	0	up
TRINITY_DN1006_c0_g1	287.663	140.292	1.03595	0	0	up
TRINITY_DN2843_c2_g3	134.819	49.9238	1.43322	0	0	up
TRINITY_DN3184_c0_g2	31.477	103.121	-1.71197	0	0	down
TRINITY_DN1700_c0_g1	114.714	14.2749	3.00649	0	0	up
TRINITY_DN3252_c2_g1	74.5085	193.917	-1.37996	0	0	down
TRINITY_DN3431_c2_g1	67.6992	22.4757	1.59077	0	0	up
TRINITY_DN3080_c1_g3	121.987	53.8478	1.17977	0	0	up
TRINITY_DN2818_c0_g10	323.48	89.1414	1.85951	0	0	up
TRINITY_DN3299_c0_g6	67.1938	24.7089	1.4433	0	0	up
TRINITY_DN2327_c0_g1	100.199	25.0374	2.00071	0	0	up
TRINITY_DN3525_c3_g4	21.4628	104.701	-2.28636	0	0	down
TRINITY_DN3200_c0_g4	26.3811	75.8641	-1.52391	0	0	down
TRINITY_DN3679_c1_g1	169.122	63.0562	1.42336	0	0	up
TRINITY_DN3498_c2_g1	251.858	71.1943	1.82278	0	0	up
TRINITY_DN2968_c1_g2	9.55848	32.189	-1.75172	0	0	down
TRINITY_DN876_c0_g1	206.318	77.2703	1.41688	0	0	up
TRINITY_DN1549_c0_g1	179.813	35.5789	2.3374	0	0	up
TRINITY_DN3090_c1_g3	37.2964	112.931	-1.59833	0	0	down
TRINITY_DN2999_c1_g1	14.7036	84.5668	-2.52393	0	0	down
TRINITY_DN2650_c1_g2	33.6195	132.433	-1.97789	0	0	down
TRINITY_DN3461_c2_g2	40.3591	91.8084	-1.18573	0	0	down
TRINITY_DN3371_c3_g1	141.921	47.8458	1.56862	0	0	up
TRINITY_DN2923_c6_g1	16.0482	121.887	-2.92506	0	0	down
TRINITY_DN3637_c2_g3	47.8468	18.8679	1.34249	0	0	up
TRINITY_DN2691_c1_g4	166.734	66.8092	1.31943	0	0	up
TRINITY_DN3132_c1_g3	151.505	23.21	2.70655	0	0	up
TRINITY_DN3577_c2_g1	276.651	56.2698	2.29763	0	0	up
TRINITY_DN1142_c0_g1	4.58833	90.8964	-4.30818	0	0	down
TRINITY_DN2700_c2_g6	105.036	398.842	-1.92494	0	0	down
TRINITY_DN2269_c0_g1	14.2769	43.827	-1.61814	0	0	down
TRINITY_DN3125_c3_g7	6.34993	31.6931	-2.31936	0	0	down
TRINITY_DN3054_c0_g5	18.4469	54.4396	-1.56128	0	0	down
TRINITY_DN3737_c1_g2	42.2399	0.880436	5.58424	0	0	up
TRINITY_DN3462_c3_g2	19.5207	48.8039	-1.32199	0	0	down
TRINITY_DN3386_c1_g2	15.1823	73.5788	-2.2769	0	0	down
TRINITY_DN2922_c2_g1	31.5432	121.472	-1.94522	0	0	down
TRINITY_DN2898_c0_g2	44.225	133.839	-1.59756	0	0	down
TRINITY_DN972_c0_g1	12.3495	171.385	-3.79471	0	0	down
TRINITY_DN2870_c0_g3	63.3972	26.5802	1.25407	0	0	up
TRINITY_DN2650_c0_g1	6.91835	40.8515	-2.56189	0	0	down
TRINITY_DN4508_c0_g1	152.624	25.5445	2.5789	0	0	up
TRINITY_DN1418_c0_g1	390.572	145.622	1.42336	0	0	up
TRINITY_DN2972_c3_g3	46.1579	223.121	-2.27318	0	0	down
TRINITY_DN2183_c0_g1	2.08189	34.4599	-4.04895	0	0	down
TRINITY_DN3030_c0_g5	11.6315	41.0522	-1.81943	0	0	down
TRINITY_DN3249_c2_g2	149.087	68.8669	1.11427	0	0	up
TRINITY_DN1974_c0_g1	108.716	48.0111	1.17912	0	0	up
TRINITY_DN3579_c1_g1	6.37146	38.4428	-2.59302	0	0	down
TRINITY_DN3473_c2_g1	4.43261	35.0123	-2.98163	0	0	down
TRINITY_DN3112_c3_g1	7.29464	45.0256	-2.62584	0	0	down
TRINITY_DN1621_c0_g1	86.5853	11.2178	2.94833	0	0	up
TRINITY_DN2940_c0_g8	1.54423	39.4493	-4.67504	0	0	down
TRINITY_DN2924_c3_g3	83.4134	190.438	-1.19097	0	0	down
TRINITY_DN2741_c3_g3	17.9343	87.3983	-2.28489	0	0	down
TRINITY_DN2856_c2_g1	11.2966	66.7037	-2.56188	0	0	down
TRINITY_DN3229_c3_g1	115.635	272.627	-1.23736	0	0	down
TRINITY_DN2131_c0_g1	26.9576	102.994	-1.9338	0	0	down
TRINITY_DN3046_c0_g2	48.9732	145.917	-1.57508	0	0	down
TRINITY_DN2020_c0_g1	77.638	262.44	-1.75715	0	0	down
TRINITY_DN2656_c0_g1	93.9038	193.177	-1.04067	0	0	down
TRINITY_DN2615_c4_g1	25.8983	65.0095	-1.3278	0	0	down
TRINITY_DN3709_c2_g1	9.30989	54.7752	-2.55669	0	0	down
TRINITY_DN3663_c2_g7	12.3305	44.5144	-1.85205	0	0	down
TRINITY_DN1767_c0_g1	121.409	317.764	-1.38808	0	0	down
TRINITY_DN2137_c0_g1	95.2544	38.3871	1.31117	0	0	up
TRINITY_DN3311_c4_g1	69.8987	304.777	-2.12442	0	0	down
TRINITY_DN3140_c0_g1	74.2117	152.286	-1.03706	0	0	down
TRINITY_DN3019_c1_g3	22.0009	6.19946	1.82735	0	0	up
TRINITY_DN2521_c5_g1	10.7446	36.9208	-1.78082	0	0	down
TRINITY_DN2585_c0_g4	93.5999	40.8391	1.19656	0	0	up
TRINITY_DN2572_c0_g3	43.4402	9.58834	2.17968	8.18949e-308	1.4255e-306	up
TRINITY_DN3624_c2_g1	1.81012	28.0441	-3.95354	1.35528e-307	2.35634e-306	down
TRINITY_DN2133_c0_g1	32.5942	133.392	-2.03298	2.18979e-307	3.80292e-306	down
TRINITY_DN3676_c1_g1	19.8184	49.8946	-1.33204	2.47653e-307	4.29596e-306	down
TRINITY_DN3235_c2_g2	32.4281	99.4081	-1.61612	6.12843e-307	1.06186e-305	down
TRINITY_DN3504_c1_g1	374.155	154.625	1.27486	2.54761e-304	4.40414e-303	up
TRINITY_DN2809_c2_g2	85.4657	20.785	2.0398	2.7832e-304	4.80593e-303	up
TRINITY_DN1361_c0_g1	149.073	344.851	-1.20995	3.11707e-304	5.37632e-303	down
TRINITY_DN2974_c3_g1	37.454	117.326	-1.64733	8.39579e-304	1.44646e-302	down
TRINITY_DN1555_c0_g1	94.3327	207.677	-1.13851	8.88125e-304	1.52836e-302	down
TRINITY_DN2778_c5_g1	16.8817	48.3622	-1.51842	1.14601e-303	1.96991e-302	down
TRINITY_DN2618_c2_g6	14.9202	56.6443	-1.92466	1.09924e-302	1.88739e-301	down
TRINITY_DN2804_c1_g1	15.333	55.5875	-1.85812	4.16836e-302	7.14892e-301	down
TRINITY_DN3201_c0_g1	33.0539	96.4377	-1.54478	1.5166e-301	2.5981e-300	down
TRINITY_DN1527_c0_g1	93.7701	19.3375	2.27772	2.05126e-301	3.51006e-300	up
TRINITY_DN2333_c0_g1	105.552	50.7976	1.05512	1.01958e-300	1.73879e-299	up
TRINITY_DN2875_c3_g2	162.609	79.8283	1.02643	2.40206e-298	4.08269e-297	up
TRINITY_DN3662_c0_g1	6.30361	30.9582	-2.29607	6.04886e-297	1.0258e-295	down
TRINITY_DN2537_c1_g1	11.3005	85.4194	-2.91818	6.83077e-297	1.15711e-295	down
TRINITY_DN1333_c0_g1	124.602	45.3806	1.45717	2.98297e-296	5.04741e-295	up
TRINITY_DN3334_c2_g4	12.7125	39.7089	-1.64322	3.43534e-296	5.80638e-295	down
TRINITY_DN2664_c2_g2	66.3432	134.07	-1.01496	3.82983e-296	6.46593e-295	down
TRINITY_DN3020_c4_g4	21.011	58.1735	-1.46922	1.03193e-295	1.74027e-294	down
TRINITY_DN3569_c7_g3	324.18	149.547	1.1162	1.71597e-295	2.89064e-294	up
TRINITY_DN3197_c3_g2	117.409	240.013	-1.03157	3.70605e-295	6.23613e-294	down
TRINITY_DN2551_c1_g3	46.43	148.897	-1.68119	4.17388e-294	7.00778e-293	down
TRINITY_DN1078_c0_g1	33.3286	117.374	-1.81628	5.62618e-294	9.43567e-293	down
TRINITY_DN3233_c1_g1	349.453	149.001	1.22978	3.09038e-293	5.16574e-292	up
TRINITY_DN1482_c0_g1	66.5141	15.0091	2.14782	4.69117e-293	7.83291e-292	up
TRINITY_DN1895_c0_g1	137.362	359.351	-1.38741	1.84275e-292	3.0701e-291	down
TRINITY_DN3589_c6_g3	36.1262	119.568	-1.72672	2.57524e-292	4.28576e-291	down
TRINITY_DN2662_c0_g1	31.1109	5.37686	2.53259	2.58326e-292	4.29439e-291	up
TRINITY_DN2760_c2_g1	36.1215	14.5823	1.30864	5.8e-292	9.63131e-291	up
TRINITY_DN2440_c0_g1	73.1879	174.785	-1.25591	1.50646e-291	2.49884e-290	down
TRINITY_DN3583_c0_g1	83.2829	19.4498	2.09826	2.44425e-291	4.04998e-290	up
TRINITY_DN2810_c2_g1	51.4294	17.1325	1.58586	3.03065e-291	5.01612e-290	up
TRINITY_DN3702_c1_g2	24.5614	81.4639	-1.72977	7.52665e-291	1.2444e-289	down
TRINITY_DN2730_c0_g2	46.3166	97.0986	-1.06792	1.24175e-290	2.05078e-289	down
TRINITY_DN2940_c0_g6	87.5061	14.8036	2.56344	1.60435e-290	2.64674e-289	up
TRINITY_DN2851_c1_g6	174.805	71.2347	1.29509	2.96536e-290	4.88672e-289	up
TRINITY_DN3720_c1_g4	114.152	30.3191	1.91266	7.92953e-290	1.30532e-288	up
TRINITY_DN1064_c0_g1	87.5119	23.377	1.90439	1.50798e-288	2.47966e-287	up
TRINITY_DN3313_c6_g1	78.8515	176.943	-1.16608	3.86617e-288	6.33676e-287	down
TRINITY_DN3281_c3_g1	25.3043	1.55471	4.02467	9.94832e-288	1.6288e-286	up
TRINITY_DN3067_c0_g1	146.039	66.4561	1.13588	3.51567e-287	5.74985e-286	up
TRINITY_DN3537_c2_g1	3.92416	20.9928	-2.41944	4.38445e-287	7.163e-286	down
TRINITY_DN2618_c2_g1	4.15015	22.7243	-2.453	1.58495e-286	2.58659e-285	down
TRINITY_DN3223_c0_g3	119.249	337.266	-1.49991	4.03308e-286	6.56772e-285	down
TRINITY_DN3379_c1_g1	28.3993	0.213333	7.05661	4.24936e-286	6.9125e-285	up
TRINITY_DN3068_c1_g1	37.3769	108.524	-1.5378	7.00817e-286	1.13881e-284	down
TRINITY_DN3512_c0_g1	11.1651	35.822	-1.68184	1.30614e-285	2.12017e-284	down
TRINITY_DN3640_c4_g4	82.5049	170.564	-1.04776	2.44286e-285	3.95686e-284	down
TRINITY_DN3150_c0_g1	9.48202	52.6132	-2.47216	1.01802e-284	1.6472e-283	down
TRINITY_DN3622_c1_g1	21.4967	48.1169	-1.16243	1.04013e-281	1.67939e-280	down
TRINITY_DN2583_c2_g2	44.1164	91.4709	-1.052	1.56404e-281	2.5226e-280	down
TRINITY_DN2576_c1_g3	22.4049	71.8033	-1.68024	1.96036e-281	3.15845e-280	down
TRINITY_DN3542_c0_g7	99.2222	223.403	-1.17091	2.29953e-281	3.70098e-280	down
TRINITY_DN2764_c0_g2	35.7656	100.067	-1.48432	3.20668e-281	5.15551e-280	down
TRINITY_DN2940_c0_g7	105.533	49.8438	1.08221	6.3385e-281	1.01799e-279	up
TRINITY_DN2750_c0_g2	158.938	52.0754	1.60979	1.33616e-280	2.14138e-279	up
TRINITY_DN3321_c5_g1	16.6518	0.233188	6.15804	4.31258e-280	6.90423e-279	up
TRINITY_DN2434_c0_g1	3.59508	32.1111	-3.15897	6.17923e-280	9.88221e-279	down
TRINITY_DN3381_c5_g3	41.2106	113.771	-1.46505	6.38986e-280	1.02083e-278	down
TRINITY_DN1458_c0_g1	161.006	35.7494	2.17112	2.24443e-279	3.5781e-278	up
TRINITY_DN2775_c0_g1	64.5831	163.812	-1.34281	5.02403e-279	8.00097e-278	down
TRINITY_DN3160_c3_g6	277.94	126.98	1.13017	6.3327e-278	1.0064e-276	up
TRINITY_DN2255_c0_g1	181.106	408.285	-1.17274	7.15612e-278	1.13606e-276	down
TRINITY_DN3047_c4_g1	25.4571	217.347	-3.09386	1.28862e-277	2.04359e-276	down
TRINITY_DN2941_c1_g3	49.5604	141.979	-1.51842	4.21071e-277	6.6707e-276	down
TRINITY_DN3697_c1_g1	19.6955	556.013	-4.81918	6.56188e-277	1.03738e-275	down
TRINITY_DN2227_c0_g1	113.804	42.4879	1.42143	2.34151e-276	3.69789e-275	up
TRINITY_DN2816_c2_g2	17.136	69.8582	-2.0274	2.16812e-275	3.41339e-274	down
TRINITY_DN3364_c5_g1	47.6004	110.619	-1.21655	1.41146e-274	2.21753e-273	down
TRINITY_DN3454_c0_g3	70.6414	142.564	-1.01303	1.65038e-274	2.59021e-273	down
TRINITY_DN3234_c3_g1	56.1561	12.1615	2.20713	1.93656e-274	3.03621e-273	up
TRINITY_DN3143_c0_g1	244.175	519.205	-1.08839	7.73791e-274	1.21193e-272	down
TRINITY_DN2922_c1_g1	3.29	35.4818	-3.43092	2.68332e-273	4.194e-272	down
TRINITY_DN2624_c5_g6	642.831	230.93	1.47699	6.21145e-273	9.68845e-272	up
TRINITY_DN3165_c6_g1	82.6849	211.302	-1.35361	1.85274e-272	2.88689e-271	down
TRINITY_DN878_c0_g1	40.9105	4.45308	3.1996	1.94501e-271	3.02754e-270	up
TRINITY_DN3416_c0_g5	38.6467	0.64377	5.90766	3.2618e-271	5.07202e-270	up
TRINITY_DN2613_c3_g1	32.0569	78.7529	-1.2967	4.14233e-271	6.43462e-270	down
TRINITY_DN1522_c0_g1	152.426	60.5949	1.33084	9.65261e-271	1.49788e-269	up
TRINITY_DN3221_c3_g2	215.711	436.577	-1.01714	2.16684e-269	3.35561e-268	down
TRINITY_DN2628_c0_g1	18.2785	58.0631	-1.66747	3.52855e-269	5.45882e-268	down
TRINITY_DN2799_c7_g1	41.6856	115.914	-1.47544	5.20351e-269	8.04184e-268	down
TRINITY_DN2914_c2_g1	85.8602	201.555	-1.23111	7.27351e-269	1.12295e-267	down
TRINITY_DN2682_c3_g5	8.09693	39.6441	-2.29166	1.69645e-268	2.61646e-267	down
TRINITY_DN2613_c1_g1	50.9087	15.806	1.68744	4.26505e-268	6.57138e-267	up
TRINITY_DN3561_c0_g1	1.71877	17.3161	-3.33267	5.93477e-268	9.13473e-267	down
TRINITY_DN3254_c4_g1	115.097	53.6181	1.10206	3.15829e-267	4.85628e-266	up
TRINITY_DN2835_c4_g1	30.8891	81.376	-1.39751	1.00987e-266	1.55122e-265	down
TRINITY_DN1768_c0_g1	129.491	308.154	-1.2508	1.05967e-265	1.62443e-264	down
TRINITY_DN2489_c0_g2	34.4912	13.6884	1.33328	1.50437e-264	2.30149e-263	up
TRINITY_DN3353_c4_g2	41.0532	117.149	-1.51277	3.82427e-264	5.84473e-263	down
TRINITY_DN3259_c2_g3	25.8129	58.4191	-1.17835	5.26929e-264	8.04508e-263	down
TRINITY_DN3081_c0_g1	109.785	46.334	1.24454	7.07858e-264	1.07966e-262	up
TRINITY_DN3728_c2_g3	55.238	13.4712	2.03579	1.1106e-263	1.68885e-262	up
TRINITY_DN3280_c5_g1	11.9178	71.8618	-2.59211	2.08053e-263	3.15745e-262	down
TRINITY_DN2698_c1_g3	31.3451	94.4673	-1.59157	2.47185e-263	3.74758e-262	down
TRINITY_DN3276_c3_g1	36.0879	103.183	-1.51562	1.76044e-262	2.66367e-261	down
TRINITY_DN2683_c3_g2	50.1898	112.886	-1.1694	9.4635e-262	1.42905e-260	down
TRINITY_DN1607_c0_g1	0.465983	39.9529	-6.42188	1.30935e-261	1.97522e-260	down
TRINITY_DN2728_c0_g1	28.7103	95.8478	-1.73918	1.20249e-260	1.81223e-259	down
TRINITY_DN3668_c2_g3	35.7087	84.2971	-1.23921	3.53741e-260	5.3205e-259	down
TRINITY_DN2586_c1_g1	11.8653	47.0548	-1.98759	4.30236e-260	6.46463e-259	down
TRINITY_DN3431_c0_g1	65.3115	174.039	-1.41401	5.24206e-260	7.8688e-259	down
TRINITY_DN3355_c1_g1	28.6396	95.5684	-1.73852	6.27649e-260	9.41225e-259	down
TRINITY_DN2921_c2_g1	72.9504	12.4017	2.55638	3.46691e-259	5.19385e-258	up
TRINITY_DN3517_c1_g9	87.0574	4.41074	4.30287	6.27337e-259	9.38899e-258	up
TRINITY_DN3364_c6_g1	39.5293	14.5725	1.43968	6.56077e-259	9.80945e-258	up
TRINITY_DN2949_c0_g5	46.4476	117.55	-1.3396	1.16457e-258	1.73952e-257	down
TRINITY_DN3202_c2_g1	103.958	34.8511	1.57673	2.42465e-258	3.61457e-257	up
TRINITY_DN1658_c0_g1	8.55995	30.8292	-1.84862	3.94785e-258	5.8795e-257	down
TRINITY_DN3313_c3_g2	22.2293	124.953	-2.49085	1.30199e-257	1.93714e-256	down
TRINITY_DN2719_c3_g1	67.6586	158.019	-1.22375	1.40507e-257	2.08845e-256	down
TRINITY_DN2883_c0_g4	57.7163	19.541	1.56248	5.63261e-257	8.35577e-256	up
TRINITY_DN3661_c0_g1	69.29	28.7397	1.2696	8.98051e-257	1.33092e-255	up
TRINITY_DN3532_c0_g2	31.5783	64.1129	-1.02168	1.39859e-256	2.0707e-255	down
TRINITY_DN3111_c1_g2	122.718	55.5145	1.14441	1.82141e-256	2.69409e-255	up
TRINITY_DN2948_c4_g2	18.4102	56.6449	-1.62144	2.02627e-256	2.99418e-255	down
TRINITY_DN3099_c5_g3	60.7293	0.0001	19.212	2.25744e-256	3.33253e-255	up
TRINITY_DN902_c0_g1	140.007	55.3871	1.33787	7.9022e-256	1.16429e-254	up
TRINITY_DN3577_c2_g2	137.397	4.02086	5.0947	5.82115e-255	8.56839e-254	up
TRINITY_DN2608_c3_g1	25.6338	67.5841	-1.39864	7.37533e-255	1.08455e-253	down
TRINITY_DN2506_c2_g4	69.0178	29.4331	1.22953	7.58971e-255	1.115e-253	up
TRINITY_DN2297_c0_g1	166.493	72.7484	1.19447	1.11769e-254	1.64039e-253	up
TRINITY_DN2863_c0_g2	50.6134	114.417	-1.17671	1.22025e-253	1.78747e-252	down
TRINITY_DN3125_c1_g1	109.854	52.7742	1.05768	7.79891e-251	1.13911e-249	up
TRINITY_DN1865_c0_g1	91.3077	205.301	-1.16893	1.89988e-249	2.77229e-248	down
TRINITY_DN3074_c4_g1	25.161	75.8796	-1.59252	3.49844e-249	5.09509e-248	down
TRINITY_DN2991_c3_g1	58.7872	141.944	-1.27175	3.57131e-249	5.19622e-248	down
TRINITY_DN2525_c1_g1	34.468	108.368	-1.65261	3.83541e-249	5.57513e-248	down
TRINITY_DN3185_c4_g8	27.9412	96.6276	-1.79004	1.15273e-248	1.67399e-247	down
TRINITY_DN2967_c1_g1	14.9888	85.7987	-2.51707	1.59716e-248	2.31497e-247	down
TRINITY_DN3518_c1_g2	44.9731	19.3794	1.21454	1.90889e-248	2.76416e-247	up
TRINITY_DN2334_c0_g2	26.3564	66.1335	-1.32723	2.47772e-248	3.58442e-247	down
TRINITY_DN3430_c3_g1	5.73665	19.0369	-1.73052	1.81968e-247	2.62995e-246	down
TRINITY_DN2934_c2_g1	23.1479	82.0349	-1.82536	3.4834e-247	5.0297e-246	down
TRINITY_DN2318_c0_g1	22.5049	4.79986	2.22917	3.91037e-247	5.64083e-246	up
TRINITY_DN3321_c5_g2	51.8915	0.420269	6.94804	2.32114e-246	3.34195e-245	up
TRINITY_DN2890_c2_g3	16.3496	47.7505	-1.54626	2.42433e-246	3.48722e-245	down
TRINITY_DN2749_c3_g1	41.6686	136.003	-1.70661	3.52962e-246	5.07229e-245	down
TRINITY_DN3426_c2_g1	36.6913	259.097	-2.81998	4.7469e-245	6.81512e-244	down
TRINITY_DN1790_c0_g1	19.7585	60.3329	-1.61047	8.48978e-245	1.21428e-243	down
TRINITY_DN1861_c0_g1	2.02663	39.2308	-4.27483	1.30544e-244	1.86539e-243	down
TRINITY_DN2288_c0_g1	32.6156	82.6555	-1.34155	1.32997e-244	1.89865e-243	down
TRINITY_DN1688_c0_g1	190.014	69.7026	1.44682	1.63784e-244	2.33597e-243	up
TRINITY_DN3461_c2_g1	2.20213	28.1958	-3.67851	1.06818e-243	1.5192e-242	down
TRINITY_DN2500_c0_g1	42.5832	121.451	-1.51202	1.46039e-243	2.07507e-242	down
TRINITY_DN2456_c5_g4	8.11429	73.4273	-3.17778	1.53702e-243	2.18191e-242	down
TRINITY_DN3514_c1_g1	49.8596	19.1744	1.37869	3.39201e-243	4.81069e-242	up
TRINITY_DN3243_c2_g4	25.1537	7.11419	1.822	8.11543e-243	1.14989e-241	up
TRINITY_DN3233_c2_g1	21.4955	55.3584	-1.36477	1.28522e-242	1.81934e-241	down
TRINITY_DN2924_c2_g1	23.9547	5.10395	2.23062	7.73336e-242	1.09167e-240	up
TRINITY_DN3607_c1_g1	106.269	286.349	-1.43006	4.57456e-241	6.45163e-240	down
TRINITY_DN3559_c0_g4	69.0253	201.401	-1.54487	1.10545e-240	1.55616e-239	down
TRINITY_DN3422_c3_g1	18.7547	53.6568	-1.51651	1.99998e-240	2.81277e-239	down
TRINITY_DN2754_c0_g1	22.4926	95.2057	-2.0816	2.358e-240	3.31322e-239	down
TRINITY_DN2599_c4_g1	123.809	58.9437	1.07071	3.23781e-240	4.54102e-239	up
TRINITY_DN3237_c3_g1	45.9358	104.873	-1.19095	4.54467e-240	6.368e-239	down
TRINITY_DN3520_c4_g1	145.829	62.3294	1.22629	6.6998e-240	9.3791e-239	up
TRINITY_DN3668_c2_g5	129.692	59.5577	1.12273	8.5371e-240	1.19401e-238	up
TRINITY_DN3240_c4_g1	6.817	26.6938	-1.96929	1.39668e-239	1.95162e-238	down
TRINITY_DN3043_c1_g2	46.8612	145.625	-1.63579	1.66852e-239	2.32932e-238	down
TRINITY_DN2301_c0_g1	41.2984	7.97308	2.37288	2.4909e-239	3.46782e-238	up
TRINITY_DN2274_c0_g1	62.3225	15.3041	2.02584	6.192e-239	8.61256e-238	up
TRINITY_DN3164_c1_g1	23.2919	107.851	-2.21115	1.25355e-238	1.74039e-237	down
TRINITY_DN3427_c1_g1	10.6897	38.7307	-1.85726	1.51249e-238	2.09797e-237	down
TRINITY_DN1231_c0_g1	142.295	43.301	1.71641	2.85439e-238	3.95209e-237	up
TRINITY_DN3489_c1_g1	111.708	32.0756	1.80018	4.33138e-238	5.99161e-237	up
TRINITY_DN2605_c4_g2	35.3744	98.7684	-1.48134	4.66977e-238	6.45382e-237	down
TRINITY_DN3090_c1_g1	5.36886	27.9837	-2.3819	2.87861e-237	3.97113e-236	down
TRINITY_DN1407_c0_g1	4.65991	41.7299	-3.16271	6.80901e-237	9.38467e-236	down
TRINITY_DN2574_c0_g5	6.55933	29.533	-2.17071	9.03574e-237	1.24424e-235	down
TRINITY_DN3210_c2_g1	8.70847	28.3011	-1.70037	4.53284e-236	6.23615e-235	down
TRINITY_DN3684_c0_g1	135.2	286.772	-1.08481	2.35555e-235	3.23776e-234	down
TRINITY_DN1227_c0_g1	127.876	22.8076	2.48716	2.64109e-235	3.62695e-234	up
TRINITY_DN2827_c2_g6	9.15661	49.1734	-2.42499	4.04449e-235	5.54918e-234	down
TRINITY_DN2911_c1_g1	5.71972	23.1283	-2.01564	4.15687e-235	5.69822e-234	down
TRINITY_DN3228_c6_g1	8.19407	39.0973	-2.25442	1.20709e-234	1.65168e-233	down
TRINITY_DN1055_c0_g1	16.8186	79.3161	-2.23756	1.6546e-234	2.26198e-233	down
TRINITY_DN3721_c2_g1	0.740376	11.5919	-3.96872	1.82318e-234	2.49021e-233	down
TRINITY_DN3674_c0_g9	139.45	413.377	-1.56771	3.55125e-234	4.84178e-233	down
TRINITY_DN3286_c2_g1	81.3282	36.3313	1.16254	3.47536e-233	4.72555e-232	up
TRINITY_DN3326_c1_g1	547.089	190.409	1.52268	1.52875e-231	2.07497e-230	up
TRINITY_DN2669_c5_g2	65.93	17.2978	1.93035	4.5412e-231	6.15824e-230	up
TRINITY_DN2928_c1_g3	51.4536	125.793	-1.28971	9.72937e-231	1.3182e-229	down
TRINITY_DN1485_c0_g1	0.432874	28.9728	-6.06461	1.99808e-230	2.70473e-229	down
TRINITY_DN3621_c5_g1	85.9054	211.102	-1.29712	2.41458e-230	3.2656e-229	down
TRINITY_DN2814_c4_g8	35.7084	143.11	-2.00279	3.87335e-230	5.23385e-229	down
TRINITY_DN916_c0_g1	3.24592	120.415	-5.21324	8.94915e-230	1.20817e-228	down
TRINITY_DN2781_c0_g1	9.60537	32.8571	-1.77429	1.05322e-229	1.42062e-228	down
TRINITY_DN3446_c1_g3	31.6906	65.9612	-1.05757	1.91618e-229	2.58004e-228	down
TRINITY_DN2889_c1_g4	9.65555	40.5212	-2.06925	6.95379e-229	9.33804e-228	down
TRINITY_DN2688_c0_g1	36.3454	162.135	-2.15735	1.68274e-228	2.25571e-227	down
TRINITY_DN2878_c0_g2	21.3329	1.72089	3.63185	2.08382e-228	2.79089e-227	up
TRINITY_DN2663_c3_g1	56.5457	116.532	-1.04324	2.94243e-228	3.93388e-227	down
TRINITY_DN3332_c2_g1	28.4802	81.3236	-1.51371	3.43708e-228	4.59116e-227	down
TRINITY_DN3309_c3_g2	6.38548	25.2851	-1.98542	4.22425e-228	5.63766e-227	down
TRINITY_DN3111_c0_g2	46.0127	99.7922	-1.1169	4.50565e-228	6.00792e-227	down
TRINITY_DN1971_c0_g1	104.618	305.224	-1.54473	1.42223e-227	1.89476e-226	down
TRINITY_DN3587_c6_g1	5.97052	42.6143	-2.83541	3.48902e-227	4.64416e-226	down
TRINITY_DN950_c0_g1	2.31578	77.0988	-5.05714	1.86751e-226	2.48144e-225	down
TRINITY_DN3081_c4_g2	48.8417	150.244	-1.62112	2.29742e-226	3.05001e-225	down
TRINITY_DN2782_c0_g3	16.2731	56.5273	-1.79646	3.0147e-225	3.99876e-224	down
TRINITY_DN3031_c3_g1	21.83	99.3164	-2.18572	6.04549e-225	8.01186e-224	down
TRINITY_DN2446_c0_g2	8.02452	60.5621	-2.91593	7.41349e-225	9.81624e-224	down
TRINITY_DN3109_c0_g3	66.8616	183.48	-1.45638	1.40028e-224	1.85088e-223	down
TRINITY_DN3035_c1_g2	53.5524	129.854	-1.27786	5.64895e-224	7.45376e-223	down
TRINITY_DN3402_c3_g1	107.838	40.4907	1.4132	6.10457e-224	8.04795e-223	up
TRINITY_DN2701_c4_g2	46.9027	95.0748	-1.01939	1.22772e-223	1.61575e-222	down
TRINITY_DN2788_c0_g8	9.65768	29.1955	-1.596	1.45146e-223	1.90855e-222	down
TRINITY_DN3716_c4_g3	44.2934	105.373	-1.25035	2.29166e-223	3.01074e-222	down
TRINITY_DN3045_c3_g1	4.5364	20.967	-2.2085	2.73548e-223	3.58759e-222	down
TRINITY_DN1200_c0_g1	92.5171	250.048	-1.43442	3.07886e-223	4.03445e-222	down
TRINITY_DN2315_c0_g1	29.485	3.18897	3.20882	1.14611e-222	1.49924e-221	up
TRINITY_DN2856_c3_g6	91.4989	43.2338	1.0816	2.16603e-222	2.83096e-221	up
TRINITY_DN3583_c0_g4	2.83985	35.6474	-3.64991	2.16752e-222	2.83047e-221	down
TRINITY_DN2713_c2_g4	48.3751	140.525	-1.53849	2.31182e-222	3.01631e-221	down
TRINITY_DN2840_c1_g3	56.388	159.57	-1.50073	4.51812e-222	5.88481e-221	down
TRINITY_DN2892_c1_g2	3.28075	21.4147	-2.7065	7.34971e-222	9.56472e-221	down
TRINITY_DN2855_c1_g1	65.1633	147.024	-1.17392	1.42348e-221	1.84931e-220	down
TRINITY_DN2412_c0_g2	5.55734	23.7221	-2.09377	1.98931e-221	2.58219e-220	down
TRINITY_DN3715_c1_g1	5.93279	33.6588	-2.5042	2.9223e-221	3.78999e-220	down
TRINITY_DN2991_c2_g1	17.9881	63.3092	-1.81537	5.15328e-221	6.67768e-220	down
TRINITY_DN6172_c0_g1	14.4388	114.437	-2.98653	5.19614e-220	6.72173e-219	down
TRINITY_DN3640_c0_g1	88.2919	27.8673	1.66371	9.70879e-220	1.25486e-218	up
TRINITY_DN1642_c0_g1	284.828	629.904	-1.14504	1.24214e-219	1.6041e-218	down
TRINITY_DN2634_c2_g1	192.662	72.4718	1.41058	3.85407e-219	4.96868e-218	up
TRINITY_DN2119_c0_g1	20.9997	1.91585	3.45431	5.67797e-219	7.31383e-218	up
TRINITY_DN3334_c1_g1	24.6219	91.135	-1.88806	9.10226e-219	1.17147e-217	down
TRINITY_DN3146_c0_g1	73.2537	191.291	-1.3848	3.15544e-218	4.05421e-217	down
TRINITY_DN3717_c1_g2	62.3946	31.1529	1.00206	1.3986e-217	1.79241e-216	up
TRINITY_DN2949_c0_g3	92.2048	42.9644	1.1017	1.42023e-217	1.81859e-216	up
TRINITY_DN2981_c1_g1	39.597	96.5939	-1.28654	4.54724e-217	5.81778e-216	down
TRINITY_DN3679_c1_g2	447.595	985.379	-1.13849	7.23544e-217	9.24928e-216	down
TRINITY_DN2956_c3_g3	35.0349	4.92391	2.83092	9.70886e-217	1.24007e-215	up
TRINITY_DN3378_c0_g1	37.6413	92.5964	-1.29864	3.55496e-216	4.52914e-215	down
TRINITY_DN3724_c3_g1	38.3976	98.41	-1.35779	5.95061e-216	7.56855e-215	down
TRINITY_DN2534_c3_g1	29.013	84.2209	-1.53748	1.95837e-215	2.48876e-214	down
TRINITY_DN348_c0_g1	179.954	75.3643	1.25568	1.30062e-214	1.65149e-213	up
TRINITY_DN2840_c1_g5	53.1024	125.564	-1.24157	2.67887e-214	3.39869e-213	down
TRINITY_DN3615_c5_g1	26.4105	89.6452	-1.76312	4.72348e-214	5.98268e-213	down
TRINITY_DN1969_c0_g1	25.9244	5.07538	2.35272	5.18274e-214	6.55889e-213	up
TRINITY_DN1165_c0_g1	22.125	0.530197	5.383	5.50867e-214	6.96555e-213	up
TRINITY_DN3633_c2_g2	78.3127	199.6	-1.3498	9.45262e-214	1.19326e-212	down
TRINITY_DN1557_c0_g1	154.423	52.4018	1.5592	2.82248e-213	3.56004e-212	up
TRINITY_DN3254_c4_g2	65.0921	24.6477	1.40103	3.1532e-213	3.97387e-212	up
TRINITY_DN1355_c0_g1	78.3945	38.5327	1.02467	2.1924e-212	2.75614e-211	up
TRINITY_DN2507_c1_g1	7.60261	40.74	-2.42188	6.61416e-211	8.29424e-210	down
TRINITY_DN3742_c0_g1	20.0031	59.6052	-1.57522	7.24114e-211	9.07296e-210	down
TRINITY_DN3513_c3_g2	10.6195	35.4577	-1.73938	3.01329e-210	3.76314e-209	down
TRINITY_DN3063_c1_g4	43.9705	124.765	-1.50461	8.57322e-210	1.06978e-208	down
TRINITY_DN2698_c1_g2	3.74142	32.2191	-3.10626	8.60555e-210	1.07293e-208	down
TRINITY_DN3275_c3_g1	49.9281	116.671	-1.22452	4.13452e-209	5.1422e-208	down
TRINITY_DN1538_c0_g1	19.8833	96.6341	-2.28098	8.54289e-209	1.06163e-207	down
TRINITY_DN1728_c0_g1	33.8623	8.72839	1.95589	8.93631e-209	1.10961e-207	up
TRINITY_DN2909_c2_g2	183.406	369.232	-1.00949	9.92055e-209	1.23081e-207	down
TRINITY_DN3171_c0_g1	33.3995	89.8244	-1.42728	1.86265e-208	2.30905e-207	down
TRINITY_DN3451_c2_g1	22.4217	56.1381	-1.32408	3.16885e-208	3.92188e-207	down
TRINITY_DN2768_c2_g1	50.7856	23.0427	1.14011	4.83496e-208	5.97902e-207	up
TRINITY_DN2931_c1_g1	49.1355	122.183	-1.3142	6.63411e-208	8.19721e-207	down
TRINITY_DN2854_c3_g1	45.0302	9.43689	2.25451	7.68652e-208	9.48985e-207	up
TRINITY_DN3711_c1_g2	12.5522	55.4586	-2.14347	1.14077e-207	1.40612e-206	down
TRINITY_DN3553_c2_g1	50.355	208.615	-2.05064	1.64481e-207	2.0241e-206	down
TRINITY_DN3524_c5_g6	21.1542	72.6796	-1.78061	2.88414e-207	3.54347e-206	down
TRINITY_DN3094_c3_g3	27.4142	108.791	-1.98857	6.99968e-207	8.58593e-206	down
TRINITY_DN2011_c0_g1	49.1998	139.119	-1.49959	1.32528e-206	1.62167e-205	down
TRINITY_DN2600_c0_g1	39.3254	19.381	1.02082	1.81129e-205	2.21103e-204	up
TRINITY_DN3618_c2_g2	117.338	30.1253	1.96162	7.05583e-205	8.59915e-204	up
TRINITY_DN3240_c3_g1	25.1085	122.463	-2.28609	7.43789e-205	9.0575e-204	down
TRINITY_DN2231_c0_g1	40.7974	126.581	-1.63351	8.22074e-205	1.00028e-203	down
TRINITY_DN3303_c1_g1	80.6793	163.611	-1.02	2.05316e-204	2.49423e-203	down
TRINITY_DN3297_c0_g4	19.4958	57.0364	-1.54872	2.33694e-204	2.8367e-203	down
TRINITY_DN3188_c0_g2	61.8316	25.5477	1.27515	2.52422e-204	3.06158e-203	up
TRINITY_DN3524_c4_g1	46.0117	98.5259	-1.0985	3.01704e-204	3.65639e-203	down
TRINITY_DN3145_c3_g1	18.5677	44.95	-1.27553	3.01712e-204	3.65356e-203	down
TRINITY_DN2867_c0_g1	46.6591	100.415	-1.10574	3.0193e-204	3.65328e-203	down
TRINITY_DN2753_c0_g1	25.2293	0.401413	5.97387	3.67091e-204	4.43817e-203	up
TRINITY_DN1943_c0_g1	16.3031	93.2509	-2.51597	5.65677e-204	6.83365e-203	down
TRINITY_DN3048_c6_g2	49.0892	129.108	-1.3951	3.11934e-203	3.76232e-202	down
TRINITY_DN2214_c0_g1	91.1132	201.969	-1.1484	3.31112e-203	3.99045e-202	down
TRINITY_DN2608_c3_g4	9.35285	26.5769	-1.5067	4.74502e-203	5.71399e-202	down
TRINITY_DN3727_c5_g2	84.6786	228.466	-1.43191	6.98942e-203	8.41005e-202	down
TRINITY_DN2995_c0_g3	61.7747	16.6806	1.88885	1.17779e-202	1.41606e-201	up
TRINITY_DN3039_c1_g2	34.1962	90.9139	-1.41067	3.0033e-202	3.608e-201	down
TRINITY_DN2849_c1_g2	23.5826	80.9529	-1.77936	3.10982e-202	3.73302e-201	down
TRINITY_DN2704_c3_g7	32.562	74.7283	-1.19847	4.44446e-202	5.33089e-201	down
TRINITY_DN3666_c2_g1	82.6111	6.43871	3.68149	4.64679e-202	5.56917e-201	up
TRINITY_DN3230_c1_g1	13.8632	43.1918	-1.63949	9.37907e-202	1.12319e-200	down
TRINITY_DN3738_c1_g1	47.26	135.554	-1.52018	1.46154e-201	1.74889e-200	down
TRINITY_DN2638_c4_g3	36.6504	118.759	-1.69613	1.88579e-200	2.253e-199	down
TRINITY_DN1170_c0_g1	25.6418	1.45824	4.1362	5.6597e-200	6.75643e-199	up
TRINITY_DN1845_c0_g1	74.0289	178.962	-1.2735	5.83831e-200	6.96417e-199	down
TRINITY_DN3022_c1_g3	54.0612	0.0496757	10.0878	7.93423e-200	9.45683e-199	up
TRINITY_DN2595_c3_g2	27.7296	78.5297	-1.50181	8.69372e-200	1.03539e-198	down
TRINITY_DN3321_c6_g1	48.0103	131.305	-1.4515	1.15873e-199	1.37892e-198	down
TRINITY_DN2942_c1_g5	45.1203	181.856	-2.01095	1.31394e-199	1.5624e-198	down
TRINITY_DN2130_c0_g1	25.2312	1.51282	4.0599	1.36959e-199	1.6273e-198	up
TRINITY_DN3616_c4_g4	2.13094	14.1514	-2.73138	1.42774e-199	1.69506e-198	down
TRINITY_DN3719_c1_g1	392.495	169.447	1.21184	1.50913e-199	1.79029e-198	up
TRINITY_DN3725_c0_g1	91.952	203.972	-1.14942	2.17068e-199	2.57308e-198	down
TRINITY_DN3084_c0_g4	99.8361	5.82078	4.10028	4.55483e-199	5.39077e-198	up
TRINITY_DN3061_c0_g1	5.63397	44.6867	-2.98762	5.08245e-199	6.01053e-198	down
TRINITY_DN3406_c4_g2	29.3091	0.0001	18.161	6.76172e-199	7.98399e-198	up
TRINITY_DN3204_c1_g3	14.6804	43.1724	-1.55622	1.01473e-198	1.19629e-197	down
TRINITY_DN2116_c0_g1	11.9925	52.951	-2.14253	3.43821e-198	4.04083e-197	down
TRINITY_DN3145_c2_g1	31.5745	3.02702	3.38279	8.86904e-198	1.04155e-196	up
TRINITY_DN3467_c0_g1	56.6062	22.2877	1.34471	1.03181e-197	1.21078e-196	up
TRINITY_DN1539_c0_g1	64.3752	12.3655	2.38019	1.19242e-197	1.39817e-196	up
TRINITY_DN3282_c0_g4	57.3204	24.8477	1.20594	2.40261e-197	2.81282e-196	up
TRINITY_DN3130_c2_g3	1.85891	22.72	-3.61143	2.11378e-196	2.47086e-195	down
TRINITY_DN3665_c3_g2	23.3691	92.775	-1.98914	2.98318e-196	3.48443e-195	down
TRINITY_DN3160_c3_g7	166.686	51.9237	1.68267	1.22261e-195	1.42695e-194	up
TRINITY_DN3318_c1_g3	47.3893	99.3102	-1.06738	4.32078e-195	5.03516e-194	down
TRINITY_DN2604_c0_g1	46.352	101.892	-1.13633	5.11644e-195	5.95778e-194	down
TRINITY_DN2862_c1_g2	31.6125	67.3279	-1.09071	5.20674e-195	6.05828e-194	down
TRINITY_DN3212_c1_g1	19.613	58.6196	-1.57958	1.20919e-194	1.40586e-193	down
TRINITY_DN3616_c4_g5	2.48629	19.8275	-2.99544	1.28921e-194	1.49661e-193	down
TRINITY_DN2803_c0_g5	23.843	65.036	-1.44767	1.44493e-194	1.6761e-193	down
TRINITY_DN2908_c0_g2	105.784	49.6736	1.09056	1.47626e-194	1.71113e-193	up
TRINITY_DN2837_c4_g3	9.9478	24.3634	-1.29227	1.49071e-194	1.72656e-193	down
TRINITY_DN3699_c2_g5	12.5061	37.6208	-1.5889	3.28008e-194	3.79613e-193	down
TRINITY_DN1572_c0_g1	18.389	117.287	-2.67312	3.93366e-194	4.54907e-193	down
TRINITY_DN2687_c1_g1	17.8109	50.7951	-1.51193	9.27985e-194	1.07235e-192	down
TRINITY_DN3483_c2_g1	44.855	14.5294	1.62629	1.74246e-193	2.01199e-192	up
TRINITY_DN3002_c7_g4	18.9949	50.2434	-1.40332	3.36364e-193	3.88098e-192	down
TRINITY_DN2997_c2_g9	97.9732	36.7795	1.41349	9.28433e-193	1.07042e-191	up
TRINITY_DN3732_c1_g1	1.48765	12.2633	-3.04324	9.48355e-193	1.09255e-191	down
TRINITY_DN1690_c0_g1	84.1025	30.7956	1.44942	1.28919e-192	1.48408e-191	up
TRINITY_DN3681_c1_g1	2.7516	726.105	-8.04376	2.01222e-192	2.31115e-191	down
TRINITY_DN3371_c2_g1	70.5783	172.796	-1.29177	3.03508e-192	3.48334e-191	down
TRINITY_DN2449_c0_g1	17.2404	77.8585	-2.17506	3.6042e-192	4.13338e-191	down
TRINITY_DN2852_c2_g1	96.6237	244.439	-1.33902	4.45739e-192	5.10797e-191	down
TRINITY_DN2481_c5_g1	20.5594	68.1034	-1.72793	6.24117e-192	7.14671e-191	down
TRINITY_DN3462_c1_g3	5.17539	25.3004	-2.28942	1.00485e-191	1.14978e-190	down
TRINITY_DN2090_c0_g1	225.529	471.854	-1.06503	1.55937e-191	1.78293e-190	down
TRINITY_DN2928_c1_g4	9.23338	34.9851	-1.92181	1.98814e-191	2.26975e-190	down
TRINITY_DN3047_c0_g1	19.2328	72.0766	-1.90596	2.67262e-191	3.04888e-190	down
TRINITY_DN3462_c3_g1	39.0729	114.007	-1.54489	4.04783e-191	4.61422e-190	down
TRINITY_DN2664_c0_g1	11.9717	55.0173	-2.20026	5.38304e-191	6.13165e-190	down
TRINITY_DN2745_c1_g1	47.9806	23.361	1.03835	3.93155e-190	4.47158e-189	up
TRINITY_DN3347_c0_g3	27.6678	1.72423	4.00419	6.77493e-190	7.69975e-189	up
TRINITY_DN2895_c4_g1	44.5511	95.9616	-1.107	2.16489e-189	2.45857e-188	down
TRINITY_DN3371_c8_g3	14.8169	53.0606	-1.8404	4.45346e-189	5.05003e-188	down
TRINITY_DN3275_c4_g1	24.0911	54.3562	-1.17395	6.0651e-189	6.87242e-188	down
TRINITY_DN1519_c0_g1	17.6883	0.48151	5.19909	8.57531e-189	9.7095e-188	up
TRINITY_DN2814_c4_g1	29.6994	5.88894	2.33436	8.90316e-189	1.00732e-187	up
TRINITY_DN2636_c0_g1	21.183	61.1522	-1.5295	1.6908e-188	1.91157e-187	down
TRINITY_DN2622_c0_g5	36.8336	74.0743	-1.00795	1.52199e-187	1.71433e-186	down
TRINITY_DN2806_c0_g3	38.3409	111.161	-1.5357	1.71643e-187	1.93191e-186	down
TRINITY_DN3025_c0_g1	38.9594	7.63778	2.35075	2.00026e-187	2.2497e-186	up
TRINITY_DN3579_c3_g2	124.07	59.3358	1.06418	2.40278e-187	2.70041e-186	up
TRINITY_DN3113_c1_g8	72.2222	31.213	1.2103	5.49013e-187	6.16106e-186	up
TRINITY_DN3396_c0_g3	244.545	79.2104	1.62634	6.89831e-187	7.7356e-186	up
TRINITY_DN3269_c0_g1	59.2913	10.6015	2.48356	1.7776e-186	1.99189e-185	up
TRINITY_DN3621_c2_g1	7.23869	26.8859	-1.89305	2.037e-186	2.28087e-185	down
TRINITY_DN3439_c3_g1	60.448	125.071	-1.04898	2.433e-186	2.72026e-185	down
TRINITY_DN3219_c1_g3	99.9197	42.2293	1.24253	3.91951e-186	4.37905e-185	up
TRINITY_DN2636_c0_g2	35.6053	79.6188	-1.16102	4.85345e-186	5.4185e-185	down
TRINITY_DN3267_c1_g4	47.2697	180.328	-1.93164	6.17249e-186	6.88603e-185	down
TRINITY_DN3713_c1_g1	65.3315	155.676	-1.25269	8.32502e-186	9.28057e-185	down
TRINITY_DN3421_c3_g5	39.9232	116	-1.53882	1.25472e-185	1.39771e-184	down
TRINITY_DN3489_c2_g1	1.82732	17.6674	-3.27329	7.34962e-185	8.15124e-184	down
TRINITY_DN1383_c0_g2	1.38795	47.4221	-5.09453	1.14315e-184	1.26691e-183	down
TRINITY_DN2816_c2_g1	13.5472	45.4277	-1.74558	4.6445e-184	5.1398e-183	down
TRINITY_DN3565_c0_g3	32.2751	10.8569	1.57181	1.41957e-183	1.56982e-182	up
TRINITY_DN2592_c0_g2	14.3182	43.1466	-1.5914	1.54016e-183	1.70192e-182	down
TRINITY_DN1069_c0_g1	7.77882	38.8635	-2.32079	1.728e-183	1.9081e-182	down
TRINITY_DN3362_c1_g1	12.4711	53.1951	-2.0927	5.30998e-183	5.84638e-182	down
TRINITY_DN1744_c0_g1	70.1656	152.431	-1.11932	1.77589e-182	1.95386e-181	down
TRINITY_DN3634_c5_g1	20.627	48.7289	-1.24024	3.42636e-182	3.76427e-181	down
TRINITY_DN3374_c2_g1	148.058	72.2074	1.03594	4.76069e-182	5.22263e-181	up
TRINITY_DN3434_c3_g2	38.7565	114.893	-1.56779	5.75203e-182	6.3056e-181	down
TRINITY_DN3383_c0_g2	36.6641	16.6139	1.14197	1.79883e-181	1.97053e-180	up
TRINITY_DN3380_c3_g1	17.3785	47.6547	-1.45531	1.97103e-181	2.1576e-180	down
TRINITY_DN3436_c0_g3	17.2194	46.0378	-1.41878	5.27288e-181	5.76367e-180	down
TRINITY_DN2512_c2_g1	11.3993	57.2234	-2.32767	8.82422e-181	9.63862e-180	down
TRINITY_DN2678_c0_g2	92.2708	24.6721	1.903	2.14914e-180	2.34242e-179	up
TRINITY_DN2941_c1_g1	71.3082	168.863	-1.24372	6.10517e-180	6.64469e-179	down
TRINITY_DN3167_c5_g1	23.6721	57.2294	-1.27357	8.66399e-180	9.42286e-179	down
TRINITY_DN3409_c2_g3	48.2041	108.926	-1.17611	1.19113e-179	1.29454e-178	down
TRINITY_DN3620_c2_g1	45.6802	116.214	-1.34715	4.70543e-179	5.10658e-178	down
TRINITY_DN3359_c0_g1	27.3065	94.7473	-1.79484	5.6974e-179	6.17871e-178	down
TRINITY_DN2682_c3_g4	44.5023	110.449	-1.31143	9.52982e-179	1.03275e-177	down
TRINITY_DN3513_c3_g3	39.2067	91.571	-1.22379	1.89596e-178	2.05173e-177	down
TRINITY_DN2919_c0_g1	31.7194	92.7558	-1.54807	3.15961e-178	3.41675e-177	down
TRINITY_DN2619_c3_g1	16.157	0.635107	4.66901	3.6944e-178	3.99222e-177	up
TRINITY_DN1734_c0_g1	76.173	30.984	1.29775	3.95672e-178	4.27263e-177	up
TRINITY_DN3642_c0_g2	43.2517	105.062	-1.28041	5.97201e-178	6.44424e-177	down
TRINITY_DN3372_c1_g1	8.09526	26.9528	-1.73529	7.99169e-178	8.6175e-177	down
TRINITY_DN3582_c0_g1	23.8602	93.577	-1.97155	1.01625e-177	1.09427e-176	down
TRINITY_DN3727_c4_g1	70.4811	29.0587	1.27827	1.68628e-177	1.81316e-176	up
TRINITY_DN3019_c1_g2	72.4719	29.288	1.30711	3.05261e-177	3.27767e-176	up
TRINITY_DN2937_c5_g1	73.1167	152.204	-1.05773	5.20502e-177	5.58086e-176	down
TRINITY_DN3715_c3_g4	125.949	61.9726	1.02313	7.46558e-177	7.99334e-176	up
TRINITY_DN2826_c3_g2	30.4304	98.8877	-1.70028	7.93697e-177	8.49205e-176	down
TRINITY_DN3719_c0_g4	271.318	124.644	1.12217	1.30403e-176	1.39425e-175	up
TRINITY_DN3119_c2_g1	20.9607	4.8136	2.1225	1.43852e-176	1.53696e-175	up
TRINITY_DN3599_c1_g2	109.786	225.268	-1.03695	2.35887e-176	2.51851e-175	down
TRINITY_DN3433_c0_g3	18.6758	42.627	-1.1906	7.85445e-176	8.36245e-175	down
TRINITY_DN2525_c1_g3	1.87749	14.7527	-2.9741	9.22229e-176	9.81187e-175	down
TRINITY_DN2942_c1_g4	47.7244	103.793	-1.12091	9.78777e-176	1.04062e-174	down
TRINITY_DN2535_c0_g2	71.4593	14.4349	2.30756	1.21266e-175	1.28837e-174	up
TRINITY_DN1954_c0_g1	98.9631	205.633	-1.05511	1.3476e-175	1.43073e-174	down
TRINITY_DN3627_c0_g1	3.93799	45.2137	-3.52123	1.52941e-175	1.62263e-174	down
TRINITY_DN1334_c0_g1	35.7161	97.0796	-1.4426	1.6787e-175	1.77977e-174	down
TRINITY_DN3393_c1_g2	22.2758	63.7455	-1.51685	2.71823e-175	2.87787e-174	down
TRINITY_DN3073_c0_g3	51.607	105.423	-1.03055	6.99144e-175	7.39687e-174	down
TRINITY_DN2728_c1_g2	17.1047	46.9277	-1.45605	9.65674e-175	1.02025e-173	down
TRINITY_DN2802_c1_g3	73.7447	23.1722	1.67014	2.02323e-174	2.13609e-173	up
TRINITY_DN2777_c1_g1	31.8367	11.1258	1.51678	2.86398e-174	3.02163e-173	up
TRINITY_DN3219_c2_g4	42.5588	112.934	-1.40796	4.98921e-174	5.26018e-173	down
TRINITY_DN2999_c2_g2	20.912	99.4244	-2.24927	8.50904e-174	8.95872e-173	down
TRINITY_DN3740_c0_g3	59.8789	152.481	-1.34851	1.03684e-173	1.09088e-172	down
TRINITY_DN3740_c0_g4	20.093	62.8335	-1.64484	2.82933e-173	2.97266e-172	down
TRINITY_DN2583_c1_g5	52.6664	21.4335	1.29702	3.29845e-173	3.46314e-172	up
TRINITY_DN2524_c1_g1	21.0133	0.0001	17.6809	8.05963e-173	8.4562e-172	up
TRINITY_DN797_c0_g1	3.22089	40.1494	-3.63984	9.62551e-173	1.00921e-171	down
TRINITY_DN2716_c0_g1	75.9904	36.9267	1.04115	2.14563e-172	2.24809e-171	up
TRINITY_DN2714_c1_g3	67.4163	143.856	-1.09346	3.50564e-172	3.66798e-171	down
TRINITY_DN975_c0_g1	10.9109	85.8328	-2.97576	5.79415e-172	6.05828e-171	down
TRINITY_DN3209_c3_g1	14.4529	45.6529	-1.65934	1.26197e-171	1.31677e-170	down
TRINITY_DN3129_c1_g7	86.4759	0.182246	8.89027	3.16683e-171	3.29982e-170	up
TRINITY_DN1141_c0_g1	12.8672	54.5859	-2.08483	7.23838e-171	7.53199e-170	down
TRINITY_DN1584_c0_g1	42.1747	14.8802	1.50298	8.35719e-171	8.69021e-170	up
TRINITY_DN1453_c0_g1	4.19925	29.7963	-2.82693	1.12875e-170	1.17212e-169	down
TRINITY_DN2872_c0_g5	31.7338	69.1233	-1.12315	1.80265e-170	1.87063e-169	down
TRINITY_DN2103_c0_g1	37.1636	124.397	-1.74299	2.94567e-170	3.05258e-169	down
TRINITY_DN3347_c0_g1	6.20372	36.3531	-2.55087	3.89882e-170	4.03757e-169	down
TRINITY_DN3562_c2_g1	51.0704	129.586	-1.34336	6.30269e-170	6.52253e-169	down
TRINITY_DN2734_c3_g5	12.0233	42.5682	-1.82395	2.07351e-169	2.14291e-168	down
TRINITY_DN3320_c5_g1	27.7368	66.8291	-1.26867	6.34965e-169	6.55771e-168	down
TRINITY_DN2925_c2_g1	13.7326	35.5054	-1.37043	7.21592e-169	7.44728e-168	down
TRINITY_DN2478_c1_g1	5.95241	31.5487	-2.40604	9.3938e-169	9.6884e-168	down
TRINITY_DN3464_c2_g1	13.0545	75.286	-2.52783	1.27263e-168	1.31165e-167	down
TRINITY_DN3127_c2_g2	10.1731	29.1482	-1.51865	1.50906e-168	1.55427e-167	down
TRINITY_DN2755_c0_g4	4.98676	14.4921	-1.53909	1.80305e-168	1.85455e-167	down
TRINITY_DN2961_c0_g1	56.0027	19.5383	1.51919	2.34461e-168	2.40994e-167	up
TRINITY_DN3404_c0_g1	69.428	24.9111	1.47873	3.67499e-168	3.77483e-167	up
TRINITY_DN2313_c0_g1	0.434371	20.9384	-5.59108	3.75987e-168	3.8594e-167	down
TRINITY_DN3181_c4_g4	42.6162	111.204	-1.38374	2.07068e-167	2.12262e-166	down
TRINITY_DN2629_c0_g1	8.20614	27.3773	-1.73821	2.2754e-167	2.3309e-166	down
TRINITY_DN3091_c1_g1	1513.72	714.927	1.08223	3.73405e-167	3.82255e-166	up
TRINITY_DN1842_c0_g1	294.179	131.467	1.16199	1.44244e-166	1.47364e-165	up
TRINITY_DN2898_c1_g4	22.3905	64.1158	-1.51779	3.95777e-166	4.04066e-165	down
TRINITY_DN2814_c4_g7	19.0965	2.5767	2.88971	1.42425e-165	1.4531e-164	up
TRINITY_DN2242_c0_g1	85.0163	39.3362	1.11188	3.05676e-165	3.11658e-164	up
TRINITY_DN3652_c2_g4	70.3293	319.178	-2.18216	3.53752e-165	3.60433e-164	down
TRINITY_DN3647_c1_g3	2.13104	9.56606	-2.16637	3.91806e-165	3.98937e-164	down
TRINITY_DN3669_c1_g2	28.8311	69.4059	-1.26743	4.02397e-165	4.09446e-164	down
TRINITY_DN2531_c0_g1	90.042	208.28	-1.20985	1.25344e-164	1.27199e-163	down
TRINITY_DN3572_c0_g4	49.3027	99.3233	-1.01047	1.86269e-164	1.88771e-163	down
TRINITY_DN3428_c2_g1	10.6237	40.3179	-1.92413	2.94537e-164	2.98295e-163	down
TRINITY_DN3420_c1_g1	1.00713	18.5273	-4.20133	4.53084e-164	4.58559e-163	down
TRINITY_DN3286_c3_g2	42.7163	85.731	-1.00503	7.20179e-164	7.27424e-163	down
TRINITY_DN3601_c1_g2	16.3698	37.5693	-1.19852	7.97199e-164	8.04683e-163	down
TRINITY_DN3034_c4_g3	14.1605	56.5563	-1.99782	1.16561e-163	1.17499e-162	down
TRINITY_DN3522_c0_g5	10.4283	40.1488	-1.94485	1.74995e-163	1.76168e-162	down
TRINITY_DN3465_c3_g1	19.1785	54.9563	-1.5188	1.99521e-163	2.00726e-162	down
TRINITY_DN3119_c1_g2	30.9757	11.4603	1.43449	3.04222e-163	3.05451e-162	up
TRINITY_DN3732_c0_g10	10.2262	43.6265	-2.09293	3.40176e-163	3.41099e-162	down
TRINITY_DN1659_c0_g1	55.6457	165.735	-1.57454	3.55255e-163	3.55983e-162	down
TRINITY_DN3319_c2_g1	17.0069	44.9869	-1.40338	6.51387e-163	6.5143e-162	down
TRINITY_DN3391_c0_g4	18.8566	55.4242	-1.55544	1.00253e-162	1.00194e-161	down
TRINITY_DN3044_c0_g8	125.284	42.2483	1.56823	1.52272e-162	1.52081e-161	up
TRINITY_DN2841_c2_g8	259.481	598.691	-1.20618	1.63769e-162	1.63456e-161	down
TRINITY_DN3594_c5_g1	37.3131	13.3707	1.48061	1.78375e-162	1.77917e-161	up
TRINITY_DN3650_c5_g1	2.86817	13.9085	-2.27776	1.91611e-162	1.90868e-161	down
TRINITY_DN2884_c1_g2	51.3591	112.759	-1.13455	2.6591e-162	2.64705e-161	down
TRINITY_DN3734_c0_g1	27.762	96.7842	-1.80166	6.98883e-162	6.94804e-161	down
TRINITY_DN3045_c1_g1	34.6201	75.5936	-1.12665	7.13526e-162	7.08897e-161	down
TRINITY_DN3577_c2_g8	9.24603	44.0696	-2.25288	1.75178e-161	1.73927e-160	down
TRINITY_DN2104_c0_g1	56.4728	228.322	-2.01544	1.81472e-161	1.80059e-160	down
TRINITY_DN980_c0_g1	31.1521	8.10541	1.94237	2.46275e-161	2.44197e-160	up
TRINITY_DN3586_c0_g2	27.3026	110.375	-2.01531	2.89993e-161	2.87358e-160	down
TRINITY_DN3451_c1_g4	46.4155	93.5301	-1.01082	6.73633e-161	6.66206e-160	down
TRINITY_DN2753_c0_g4	30.328	0.140394	7.75503	6.74224e-161	6.66356e-160	up
TRINITY_DN2639_c1_g1	32.1914	98.6312	-1.61537	7.55496e-161	7.46193e-160	down
TRINITY_DN2217_c0_g1	0.524375	25.3968	-5.5979	1.28347e-160	1.26684e-159	down
TRINITY_DN2975_c1_g1	18.1811	44.75	-1.29945	1.35219e-160	1.33381e-159	down
TRINITY_DN3295_c3_g3	79.4578	186.979	-1.23461	1.52981e-160	1.50802e-159	down
TRINITY_DN3252_c3_g1	14.2333	44.8387	-1.65547	2.79587e-160	2.75248e-159	down
TRINITY_DN2914_c1_g1	69.16	30.563	1.17815	5.35405e-160	5.26413e-159	up
TRINITY_DN3641_c1_g9	15.2006	0.729317	4.38144	6.75616e-160	6.63837e-159	up
TRINITY_DN3405_c2_g2	25.9763	4.67033	2.4756	8.15314e-160	8.00581e-159	up
TRINITY_DN2583_c1_g2	29.8179	11.3805	1.38962	1.16417e-159	1.1424e-158	up
TRINITY_DN3073_c1_g2	42.657	20.7298	1.04108	1.79118e-159	1.75654e-158	up
TRINITY_DN1029_c0_g1	21.0231	1.07654	4.2875	2.96872e-159	2.90755e-158	up
TRINITY_DN2542_c4_g1	25.0247	63.6199	-1.34613	9.47802e-159	9.26475e-158	down
TRINITY_DN3535_c2_g3	32.4895	73.8172	-1.18398	1.0088e-158	9.85466e-158	down
TRINITY_DN3644_c0_g1	9.57463	51.2315	-2.41974	1.0557e-158	1.03061e-157	down
TRINITY_DN1760_c0_g1	16.1748	57.9963	-1.84221	1.47619e-158	1.44019e-157	down
TRINITY_DN2688_c5_g5	32.1516	82.2151	-1.35451	2.31259e-158	2.25474e-157	down
TRINITY_DN3569_c7_g1	18.3635	60.2688	-1.71457	2.81919e-158	2.7469e-157	down
TRINITY_DN2544_c4_g1	10.0261	37.484	-1.90251	2.91295e-158	2.83643e-157	down
TRINITY_DN3009_c1_g2	12.7637	40.7507	-1.67478	4.3285e-158	4.21209e-157	down
TRINITY_DN2777_c5_g1	17.2584	56.0582	-1.69962	6.35281e-158	6.178e-157	down
TRINITY_DN3589_c3_g1	43.4756	12.1355	1.84097	2.76674e-157	2.68716e-156	up
TRINITY_DN3489_c3_g1	53.4751	153.597	-1.52221	4.83992e-157	4.69469e-156	down
TRINITY_DN805_c0_g1	30.0753	9.59407	1.64837	1.09212e-156	1.05868e-155	up
TRINITY_DN3723_c1_g4	29.7747	110.969	-1.898	1.10942e-156	1.07476e-155	down
TRINITY_DN2579_c1_g3	29.8094	3.16415	3.23588	2.16899e-156	2.0972e-155	up
TRINITY_DN2583_c1_g6	7.15751	25.2987	-1.82153	3.31531e-156	3.2015e-155	down
TRINITY_DN2858_c0_g1	56.3759	112.902	-1.00192	4.0217e-156	3.88116e-155	down
TRINITY_DN2918_c0_g1	118.846	38.9682	1.60873	4.90824e-156	4.7337e-155	up
TRINITY_DN2940_c0_g3	74.7423	12.9624	2.52759	5.43139e-156	5.23492e-155	up
TRINITY_DN3585_c2_g1	4.1437	18.2355	-2.13775	1.70766e-155	1.64275e-154	down
TRINITY_DN3436_c0_g1	8.83474	35.0728	-1.98909	2.52556e-155	2.42803e-154	down
TRINITY_DN2888_c1_g5	14.1817	2.29399	2.6281	4.70221e-155	4.51489e-154	up
TRINITY_DN2837_c4_g2	110.289	248.548	-1.17223	1.43529e-154	1.37637e-153	down
TRINITY_DN2587_c1_g6	20.2909	4.04374	2.32707	1.90923e-154	1.82623e-153	up
TRINITY_DN3058_c1_g1	4.01145	13.403	-1.74036	2.50399e-154	2.39213e-153	down
TRINITY_DN3320_c4_g2	9.07839	49.31	-2.44137	2.9107e-154	2.77891e-153	down
TRINITY_DN3448_c0_g1	29.8015	82.136	-1.46263	3.23476e-154	3.08636e-153	down
TRINITY_DN3293_c1_g2	31.97	68.0658	-1.09021	7.88532e-154	7.50467e-153	down
TRINITY_DN3238_c3_g1	11.4551	34.9783	-1.61047	1.26001e-153	1.19768e-152	down
TRINITY_DN2880_c2_g1	18.7622	5.32458	1.81709	1.67158e-153	1.5879e-152	up
TRINITY_DN3090_c2_g1	64.4804	30.9935	1.05689	3.10826e-153	2.9508e-152	up
TRINITY_DN2013_c0_g1	151.334	56.2159	1.42869	3.84369e-153	3.6467e-152	up
TRINITY_DN3248_c2_g5	5.15722	40.6966	-2.98024	4.93588e-153	4.67998e-152	down
TRINITY_DN3455_c3_g1	22.8743	66.0359	-1.52952	7.08301e-153	6.7116e-152	down
TRINITY_DN3058_c3_g6	46.4369	131.399	-1.50061	7.38425e-153	6.99267e-152	down
TRINITY_DN1884_c0_g1	47.777	3.82119	3.64422	9.20446e-153	8.71091e-152	up
TRINITY_DN3546_c0_g1	13.5292	34.043	-1.33128	9.26547e-153	8.76318e-152	down
TRINITY_DN2548_c2_g1	27.8943	0.0001	18.0896	2.27879e-152	2.15257e-151	up
TRINITY_DN3093_c2_g1	187.595	84.8451	1.14472	2.44077e-152	2.30414e-151	up
TRINITY_DN2593_c0_g3	28.2102	92.97	-1.72055	2.64464e-152	2.49505e-151	down
TRINITY_DN2976_c0_g1	54.9239	127.879	-1.21928	2.6803e-152	2.52711e-151	down
TRINITY_DN2913_c3_g5	13.1919	0.264641	5.63947	3.01003e-152	2.83624e-151	up
TRINITY_DN3288_c1_g2	13.7071	34.2766	-1.3223	3.47857e-152	3.27569e-151	down
TRINITY_DN2548_c5_g3	13.8137	43.5508	-1.6566	7.68913e-152	7.23169e-151	down
TRINITY_DN3753_c3_g2	198.401	42.4413	2.22488	9.60988e-152	9.03257e-151	up
TRINITY_DN3006_c2_g7	29.364	81.2108	-1.46762	1.53978e-151	1.44638e-150	down
TRINITY_DN2958_c1_g1	68.5954	30.6194	1.16366	5.43102e-151	5.09213e-150	up
TRINITY_DN2829_c3_g4	4.92992	24.9159	-2.33743	5.68896e-151	5.33068e-150	down
TRINITY_DN2630_c1_g1	2.2255	22.3019	-3.32497	2.3123e-150	2.16534e-149	down
TRINITY_DN3620_c2_g4	52.9735	110.029	-1.05454	2.52571e-150	2.36372e-149	down
TRINITY_DN3690_c2_g5	131.72	62.9586	1.065	2.66902e-150	2.4963e-149	up
TRINITY_DN1348_c0_g2	8.73725	31.262	-1.83916	5.55303e-150	5.19048e-149	down
TRINITY_DN3744_c0_g2	92.2208	32.499	1.5047	1.19884e-149	1.11918e-148	up
TRINITY_DN1511_c0_g1	90.402	38.1147	1.24601	3.59723e-149	3.35409e-148	up
TRINITY_DN2646_c0_g1	72.7174	23.0575	1.65706	2.47914e-148	2.3059e-147	up
TRINITY_DN2576_c0_g4	18.4819	55.639	-1.58999	3.48965e-148	3.24381e-147	down
TRINITY_DN3328_c0_g1	37.4212	16.9501	1.14256	3.70116e-148	3.43832e-147	up
TRINITY_DN2452_c0_g1	12.8114	49.648	-1.9543	3.82698e-148	3.55302e-147	down
TRINITY_DN3703_c4_g1	30.4501	92.8331	-1.60819	4.03704e-148	3.74575e-147	down
TRINITY_DN3615_c5_g8	313.734	86.84	1.85311	4.18393e-148	3.87967e-147	up
TRINITY_DN3395_c3_g3	11.8545	35.6653	-1.58909	5.94819e-148	5.51226e-147	down
TRINITY_DN3638_c0_g7	36.4559	103.477	-1.50509	6.09805e-148	5.64768e-147	down
TRINITY_DN3091_c1_g3	12.1425	31.807	-1.38928	7.37518e-148	6.82215e-147	down
TRINITY_DN3194_c0_g1	4.58382	16.337	-1.83352	2.93076e-147	2.70604e-146	down
TRINITY_DN3025_c1_g2	61.681	129.31	-1.06794	3.26497e-147	3.0128e-146	down
TRINITY_DN3748_c1_g1	21.4532	3.85013	2.47821	5.15669e-147	4.75551e-146	up
TRINITY_DN3087_c1_g3	12.328	63.9096	-2.37409	7.14533e-147	6.58543e-146	down
TRINITY_DN3194_c1_g3	20.9233	122.932	-2.55469	2.01876e-146	1.85719e-145	down
TRINITY_DN2768_c0_g1	20.8502	63.0278	-1.59593	3.86033e-146	3.54921e-145	down
TRINITY_DN2619_c2_g2	241.589	105.361	1.19721	3.99323e-146	3.66917e-145	up
TRINITY_DN3401_c2_g4	56.2276	118.647	-1.07733	4.11406e-146	3.77791e-145	down
TRINITY_DN3506_c2_g1	34.9635	70.8688	-1.0193	8.7271e-146	8.00918e-145	down
TRINITY_DN2148_c0_g1	19.5535	59.7763	-1.61215	1.14641e-145	1.05147e-144	down
TRINITY_DN3649_c4_g4	36.4403	8.29577	2.13509	1.27506e-145	1.16875e-144	up
TRINITY_DN3421_c3_g3	29.5704	95.6778	-1.69403	1.76096e-145	1.61317e-144	down
TRINITY_DN3527_c5_g1	59.7049	26.1271	1.1923	1.83866e-145	1.68333e-144	up
TRINITY_DN2565_c0_g3	31.9691	86.6148	-1.43793	2.87554e-145	2.63103e-144	down
TRINITY_DN2927_c1_g1	19.1603	43.6496	-1.18785	3.18007e-145	2.9079e-144	down
TRINITY_DN2608_c3_g3	7.17652	20.1993	-1.49295	3.64075e-145	3.32715e-144	down
TRINITY_DN3656_c1_g1	21.3047	90.5293	-2.08721	1.03059e-144	9.39549e-144	down
TRINITY_DN3184_c1_g1	134.697	40.0559	1.74963	1.16578e-144	1.06217e-143	up
TRINITY_DN2617_c3_g4	67.3332	160.428	-1.25254	1.20665e-144	1.09874e-143	down
TRINITY_DN2202_c0_g1	22.3656	7.85162	1.51022	3.67704e-144	3.34419e-143	up
TRINITY_DN3067_c3_g2	11.9514	38.4249	-1.68486	6.13474e-144	5.57272e-143	down
TRINITY_DN2880_c0_g1	17.4244	1.35348	3.68636	7.33858e-144	6.66229e-143	up
TRINITY_DN3702_c1_g9	71.8601	13.1533	2.44977	7.4632e-144	6.77137e-143	up
TRINITY_DN2897_c3_g2	19.0791	44.7403	-1.22958	1.26665e-143	1.14717e-142	down
TRINITY_DN2895_c4_g3	3.4421	11.3938	-1.72688	1.40991e-143	1.27616e-142	down
TRINITY_DN3363_c1_g1	4.08677	22.2212	-2.4429	2.32479e-143	2.10299e-142	down
TRINITY_DN2741_c3_g1	5.91833	33.0194	-2.48005	8.57487e-143	7.74292e-142	down
TRINITY_DN3238_c1_g1	10.5237	0.40853	4.68706	1.96888e-142	1.77574e-141	up
TRINITY_DN2771_c3_g1	7.52756	24.937	-1.72803	2.83747e-142	2.5576e-141	down
TRINITY_DN3580_c0_g1	7.55426	23.9902	-1.66709	8.17355e-142	7.35426e-141	down
TRINITY_DN3486_c7_g1	23.6843	6.29472	1.91172	1.00507e-141	9.03786e-141	up
TRINITY_DN2802_c3_g1	40.568	116.955	-1.52754	3.97806e-141	3.57295e-140	down
TRINITY_DN3159_c4_g3	18.2802	48.2517	-1.4003	4.4991e-141	4.03854e-140	down
TRINITY_DN3298_c0_g1	24.2738	0.0001	17.889	1.08745e-140	9.74977e-140	up
TRINITY_DN2942_c1_g6	15.5483	123.164	-2.98575	1.10011e-140	9.85744e-140	down
TRINITY_DN1323_c0_g1	78.4315	38.7345	1.01781	2.78933e-140	2.4964e-139	up
TRINITY_DN1422_c0_g1	13.6842	99.0555	-2.85573	4.06629e-140	3.63711e-139	down
TRINITY_DN2778_c4_g2	12.3167	3.19586	1.94633	1.10997e-139	9.92231e-139	up
TRINITY_DN2755_c1_g2	29.4926	11.4847	1.36064	1.38416e-139	1.2366e-138	up
TRINITY_DN2654_c2_g2	19.5113	4.78348	2.02818	1.43061e-139	1.27735e-138	up
TRINITY_DN1755_c0_g1	7.71257	33.5385	-2.12053	1.6653e-139	1.48516e-138	down
TRINITY_DN3147_c0_g1	98.3086	215.935	-1.13521	1.8357e-139	1.63616e-138	down
TRINITY_DN3295_c0_g1	335.247	103.267	1.69884	3.07598e-139	2.7384e-138	up
TRINITY_DN3108_c4_g2	17.5255	43.7965	-1.32136	3.96536e-139	3.5281e-138	down
TRINITY_DN3136_c2_g1	90.0326	41.7907	1.10727	9.02375e-139	8.02399e-138	up
TRINITY_DN3592_c2_g1	42.5746	134.677	-1.66144	1.14389e-138	1.01597e-137	down
TRINITY_DN2622_c0_g7	6.18677	23.2294	-1.90869	1.30398e-138	1.15679e-137	down
TRINITY_DN3545_c1_g2	9.54094	36.741	-1.94519	1.34753e-138	1.19473e-137	down
TRINITY_DN2841_c2_g5	56.6009	131.377	-1.21481	3.24177e-138	2.87082e-137	down
TRINITY_DN3637_c0_g1	17.9204	50.6355	-1.49855	4.55924e-138	4.03518e-137	down
TRINITY_DN2464_c1_g3	15.6116	63.0103	-2.01297	4.62198e-138	4.08832e-137	down
TRINITY_DN3680_c0_g1	17.3055	51.0345	-1.56024	5.65116e-138	4.99576e-137	down
TRINITY_DN1996_c0_g3	26.8726	1.20084	4.48402	7.49984e-138	6.62231e-137	up
TRINITY_DN1896_c0_g1	13.0494	35.191	-1.43122	7.69755e-138	6.79293e-137	down
TRINITY_DN3278_c2_g1	0.416519	12.2751	-4.88121	1.10625e-137	9.75107e-137	down
TRINITY_DN3575_c5_g6	34.4413	71.1654	-1.04704	1.70588e-137	1.50278e-136	down
TRINITY_DN3079_c2_g1	33.7658	10.1477	1.73442	1.92782e-137	1.69731e-136	up
TRINITY_DN2778_c3_g3	14.669	33.7988	-1.2042	4.22157e-137	3.71464e-136	down
TRINITY_DN1886_c0_g1	10.4111	0.0001	16.6678	4.29295e-137	3.77525e-136	up
TRINITY_DN2618_c2_g3	61.3695	27.322	1.16746	4.33975e-137	3.8142e-136	up
TRINITY_DN3707_c3_g1	14.0273	38.2296	-1.44645	4.74494e-137	4.1679e-136	down
TRINITY_DN2986_c3_g1	3.29126	12.7933	-1.95868	7.02317e-137	6.16551e-136	down
TRINITY_DN3487_c0_g1	10.6935	62.2725	-2.54186	7.92977e-137	6.95736e-136	down
TRINITY_DN2908_c0_g1	96.5067	42.3625	1.18784	1.23935e-136	1.08612e-135	up
TRINITY_DN2528_c0_g1	3.79629	24.1475	-2.66921	1.4983e-136	1.31229e-135	down
TRINITY_DN2810_c1_g1	22.3373	46.7641	-1.06595	2.13182e-136	1.86608e-135	down
TRINITY_DN2778_c4_g1	32.9739	74.3148	-1.17232	2.57793e-136	2.25398e-135	down
TRINITY_DN3581_c3_g2	34.0728	74.416	-1.12699	5.1144e-136	4.46655e-135	down
TRINITY_DN3363_c5_g2	22.6077	46.3706	-1.03639	5.31691e-136	4.64074e-135	down
TRINITY_DN3049_c2_g1	67.2785	220.283	-1.71114	6.30359e-136	5.49878e-135	down
TRINITY_DN3712_c0_g3	48.8568	104.289	-1.09395	1.19604e-135	1.04274e-134	down
TRINITY_DN2835_c1_g2	99.2159	47.4456	1.0643	1.37108e-135	1.19465e-134	up
TRINITY_DN1876_c0_g1	26.9653	3.36744	3.00138	1.62766e-135	1.4174e-134	up
TRINITY_DN3697_c5_g5	10.3333	35.4803	-1.77971	4.25641e-135	3.70232e-134	down
TRINITY_DN3616_c2_g1	24.658	8.37763	1.55744	5.12937e-135	4.45908e-134	up
TRINITY_DN2879_c0_g3	13.2877	33.6745	-1.34157	5.78443e-135	5.02566e-134	down
TRINITY_DN2674_c3_g2	9.33658	31.9178	-1.7734	1.26363e-134	1.09661e-133	down
TRINITY_DN2511_c3_g2	58.4314	3.24578	4.17011	3.63021e-134	3.14861e-133	up
TRINITY_DN2840_c0_g1	16.9899	40.5951	-1.25663	5.68847e-134	4.93098e-133	down
TRINITY_DN2653_c1_g2	40.0122	90.4579	-1.1768	6.26751e-134	5.42982e-133	down
TRINITY_DN3337_c2_g3	72.8324	160.416	-1.13917	8.0903e-134	7.00497e-133	down
TRINITY_DN3513_c3_g5	20.5985	0.117571	7.45286	1.19656e-133	1.03486e-132	up
TRINITY_DN3566_c2_g1	2.17041	20.0385	-3.20673	1.62606e-133	1.40471e-132	down
TRINITY_DN2498_c1_g2	10.3169	44.2229	-2.09978	1.71933e-133	1.48444e-132	down
TRINITY_DN2762_c2_g1	31.8764	75.565	-1.24523	2.06797e-133	1.78342e-132	down
TRINITY_DN3495_c2_g3	53.4719	16.7278	1.67653	2.12746e-133	1.83368e-132	up
TRINITY_DN3241_c2_g1	28.4001	7.72045	1.87914	2.44645e-133	2.10743e-132	up
TRINITY_DN2995_c5_g1	87.0218	34.4416	1.33722	3.38134e-133	2.90945e-132	up
TRINITY_DN2528_c4_g3	54.0836	12.4294	2.12143	3.91598e-133	3.36757e-132	up
TRINITY_DN2233_c0_g1	17.7254	0.192706	6.52328	5.35365e-133	4.60128e-132	up
TRINITY_DN2891_c0_g2	37.6626	129.108	-1.77737	1.87317e-132	1.6072e-131	down
TRINITY_DN2559_c3_g1	9.2239	24.5433	-1.41188	2.20973e-132	1.89382e-131	down
TRINITY_DN2539_c0_g1	11.6587	41.0403	-1.81563	2.75578e-132	2.36047e-131	down
TRINITY_DN2475_c0_g1	15.1031	41.2877	-1.45087	8.64251e-132	7.39859e-131	down
TRINITY_DN3570_c2_g6	19.0667	62.741	-1.71835	9.72674e-132	8.32207e-131	down
TRINITY_DN3722_c0_g1	107.633	246.586	-1.19598	1.61574e-131	1.38163e-130	down
TRINITY_DN3595_c2_g1	11.8787	33.0284	-1.47533	1.75484e-131	1.49973e-130	down
TRINITY_DN1394_c0_g1	6.84044	25.5142	-1.89914	3.33704e-131	2.8503e-130	down
TRINITY_DN3052_c1_g2	14.7294	44.5475	-1.59664	7.78896e-131	6.64538e-130	down
TRINITY_DN3599_c1_g3	5.2573	38.5385	-2.87391	1.40607e-130	1.19895e-129	down
TRINITY_DN3580_c1_g1	25.7857	72.1628	-1.48469	1.6849e-130	1.4351e-129	down
TRINITY_DN3430_c1_g2	31.8012	83.9428	-1.40033	1.8723e-130	1.59292e-129	down
TRINITY_DN3121_c0_g1	23.7147	52.8621	-1.15645	1.9953e-130	1.69662e-129	down
TRINITY_DN1914_c0_g1	36.4024	97.2178	-1.41719	2.14258e-130	1.82083e-129	down
TRINITY_DN1424_c0_g1	12.6255	55.6818	-2.14087	2.59377e-130	2.20304e-129	down
TRINITY_DN2912_c1_g3	53.828	122.494	-1.18628	4.73874e-130	4.02037e-129	down
TRINITY_DN3380_c3_g5	25.9918	70.0849	-1.43105	5.19978e-130	4.40906e-129	down
TRINITY_DN3603_c3_g6	22.3329	5.37261	2.05548	7.41575e-130	6.28453e-129	up
TRINITY_DN1733_c0_g1	11.7476	54.4791	-2.21334	1.13094e-129	9.5735e-129	down
TRINITY_DN2599_c3_g3	8.63944	29.2378	-1.75882	5.92704e-129	5.0145e-128	down
TRINITY_DN2992_c1_g1	34.5243	80.9658	-1.2297	1.0249e-128	8.65174e-128	down
TRINITY_DN2909_c0_g1	55.5358	132.018	-1.24924	1.5236e-128	1.28473e-127	down
TRINITY_DN2744_c3_g2	38.2403	13.3219	1.52129	2.53032e-128	2.13242e-127	up
TRINITY_DN3156_c4_g1	1.80203	8.40302	-2.22128	3.9562e-128	3.33037e-127	down
TRINITY_DN1467_c0_g1	9.91167	0.0815716	6.92492	4.4057e-128	3.7067e-127	up
TRINITY_DN3343_c1_g5	4.57826	18.6017	-2.02257	7.23177e-128	6.08103e-127	down
TRINITY_DN3088_c0_g3	15.602	40.8071	-1.38709	1.20132e-127	1.00904e-126	down
TRINITY_DN2993_c1_g1	6.70326	27.86	-2.05526	1.39599e-127	1.17191e-126	down
TRINITY_DN3517_c1_g4	163.359	0.0001	20.6396	2.18779e-127	1.83559e-126	up
TRINITY_DN2938_c0_g1	15.4438	51.5904	-1.74008	2.83173e-127	2.37455e-126	down
TRINITY_DN2727_c3_g1	35.3971	71.7102	-1.01854	6.49226e-127	5.44108e-126	down
TRINITY_DN2155_c0_g1	9.34547	27.5684	-1.56067	9.90945e-127	8.3004e-126	down
TRINITY_DN2700_c2_g8	2.7005	18.1306	-2.74713	1.13298e-126	9.48485e-126	down
TRINITY_DN3254_c4_g3	13.619	29.9375	-1.13633	1.20332e-126	1.00681e-125	down
TRINITY_DN3103_c3_g1	68.8718	154.495	-1.16558	1.67888e-126	1.40317e-125	down
TRINITY_DN3603_c3_g1	32.0772	68.1352	-1.08685	1.77898e-126	1.48601e-125	down
TRINITY_DN2730_c0_g3	19.39	43.8875	-1.1785	1.98003e-126	1.65304e-125	down
TRINITY_DN2952_c1_g1	41.8839	17.0588	1.29588	2.49834e-126	2.08461e-125	up
TRINITY_DN3318_c1_g6	2.65419	17.6842	-2.73612	3.72372e-126	3.10535e-125	down
TRINITY_DN2595_c1_g2	10.1547	29.969	-1.56132	5.65701e-126	4.71501e-125	down
TRINITY_DN3123_c0_g1	13.1027	27.0109	-1.04368	5.98118e-126	4.98245e-125	down
TRINITY_DN1843_c0_g1	4.12942	24.3348	-2.55901	9.16521e-126	7.63063e-125	down
TRINITY_DN2053_c0_g1	12.5552	0.558202	4.49136	1.81976e-125	1.51424e-124	up
TRINITY_DN2763_c0_g1	47.8253	109.655	-1.19712	2.40244e-125	1.99799e-124	down
TRINITY_DN3204_c1_g2	29.4871	74.085	-1.3291	3.29306e-125	2.73717e-124	down
TRINITY_DN2907_c1_g1	1.0235	27.0252	-4.72272	4.23666e-125	3.51763e-124	down
TRINITY_DN3445_c1_g2	9.52702	36.4679	-1.93653	4.77391e-125	3.96154e-124	down
TRINITY_DN3686_c8_g1	45.6286	21.3319	1.09692	6.63758e-125	5.50505e-124	up
TRINITY_DN3422_c4_g2	34.4143	117.798	-1.77524	6.9034e-125	5.72239e-124	down
TRINITY_DN3061_c1_g1	1.22923	11.4573	-3.22044	7.03927e-125	5.83183e-124	down
TRINITY_DN2207_c0_g1	0.590937	19.1764	-5.02018	9.09946e-125	7.53451e-124	down
TRINITY_DN2378_c0_g1	4.03858	27.0623	-2.74436	9.95171e-125	8.23569e-124	down
TRINITY_DN3384_c0_g1	28.1626	69.1689	-1.29634	1.04367e-124	8.63233e-124	down
TRINITY_DN2969_c1_g2	5.18353	14.4659	-1.48065	1.56511e-124	1.29241e-123	down
TRINITY_DN3638_c0_g1	14.4224	45.0845	-1.64432	1.73108e-124	1.42791e-123	down
TRINITY_DN3328_c1_g1	42.4126	12.9238	1.71447	2.13826e-124	1.7609e-123	up
TRINITY_DN1772_c0_g1	89.8116	197.498	-1.13686	2.22857e-124	1.83328e-123	down
TRINITY_DN286_c0_g1	23.52	2.62158	3.16538	7.72754e-124	6.33282e-123	up
TRINITY_DN3691_c1_g6	29.244	132.713	-2.1821	1.10404e-123	9.04286e-123	down
TRINITY_DN2924_c3_g1	32.6969	67.0156	-1.03534	2.1175e-123	1.73251e-122	down
TRINITY_DN3070_c1_g4	5.31187	25.0708	-2.23872	2.88858e-123	2.36212e-122	down
TRINITY_DN3653_c2_g8	32.3092	89.1195	-1.4638	4.45615e-123	3.64203e-122	down
TRINITY_DN3614_c0_g1	49.8674	122.683	-1.29877	5.02567e-123	4.10529e-122	down
TRINITY_DN2542_c3_g2	28.2809	12.3217	1.19863	5.63973e-123	4.60441e-122	up
TRINITY_DN1786_c0_g1	23.5336	64.6136	-1.45711	7.20827e-123	5.87867e-122	down
TRINITY_DN1703_c0_g1	31.6226	8.45456	1.90315	2.08026e-122	1.69473e-121	up
TRINITY_DN3112_c5_g1	41.4149	103.216	-1.31744	2.78189e-122	2.26511e-121	down
TRINITY_DN2683_c2_g1	55.9019	27.553	1.02069	3.43694e-122	2.79697e-121	up
TRINITY_DN3403_c2_g4	28.4528	61.3645	-1.10883	3.68687e-122	2.99875e-121	down
TRINITY_DN2762_c3_g3	18.5731	42.2461	-1.1856	7.9995e-122	6.50297e-121	down
TRINITY_DN2456_c5_g3	12.7324	27.7539	-1.12418	1.42447e-121	1.15674e-120	down
TRINITY_DN2668_c2_g1	22.6594	53.2944	-1.23388	1.82035e-121	1.47742e-120	down
TRINITY_DN3282_c0_g5	12.0623	0.949649	3.66697	1.96551e-121	1.59354e-120	up
TRINITY_DN990_c0_g1	20.0621	87.8469	-2.13052	2.4778e-121	2.0078e-120	down
TRINITY_DN3312_c1_g1	9.62193	24.5645	-1.35218	2.57702e-121	2.08708e-120	down
TRINITY_DN2058_c0_g3	1.12712	15.3394	-3.76652	3.66273e-121	2.96479e-120	down
TRINITY_DN1357_c0_g1	5.0377	29.572	-2.5534	4.74696e-121	3.83833e-120	down
TRINITY_DN3257_c2_g1	19.0008	4.6592	2.0279	5.66806e-121	4.58068e-120	up
TRINITY_DN3071_c0_g4	57.5014	136.862	-1.25105	6.96754e-121	5.62785e-120	down
TRINITY_DN2946_c0_g5	63.0932	139.092	-1.14048	9.04407e-121	7.29735e-120	down
TRINITY_DN3289_c1_g1	5.85133	16.649	-1.5086	9.64438e-121	7.77758e-120	down
TRINITY_DN934_c0_g1	32.7542	141.433	-2.11037	3.21736e-120	2.59184e-119	down
TRINITY_DN3354_c1_g1	30.2048	91.147	-1.59342	3.53448e-120	2.84579e-119	down
TRINITY_DN2997_c2_g2	19.1393	49.4856	-1.37047	3.90982e-120	3.14632e-119	down
TRINITY_DN3442_c0_g2	5.88102	18.6567	-1.66556	3.99735e-120	3.21506e-119	down
TRINITY_DN3418_c2_g3	18.8463	0.894145	4.39763	4.15459e-120	3.33975e-119	up
TRINITY_DN2887_c0_g1	40.5818	105.032	-1.37192	5.10959e-120	4.10527e-119	down
TRINITY_DN3335_c2_g1	19.7587	41.7541	-1.07943	5.41761e-120	4.35045e-119	down
TRINITY_DN1919_c0_g1	13.3091	56.1862	-2.0778	9.37963e-120	7.52804e-119	down
TRINITY_DN3236_c0_g1	18.6291	39.9457	-1.10049	1.26758e-119	1.01682e-118	down
TRINITY_DN2895_c3_g1	1.90316	9.5774	-2.33124	2.44326e-119	1.95784e-118	down
TRINITY_DN3344_c2_g1	14.1115	34.6106	-1.29435	2.59529e-119	2.07857e-118	down
TRINITY_DN3253_c0_g1	8.40579	48.8894	-2.54007	3.09555e-119	2.4766e-118	down
TRINITY_DN4070_c0_g1	49.1243	259.793	-2.40285	3.81557e-119	3.05104e-118	down
TRINITY_DN3303_c1_g2	44.739	90.0227	-1.00876	5.72632e-119	4.57653e-118	down
TRINITY_DN1829_c0_g1	17.1555	64.7942	-1.91719	1.23148e-118	9.83171e-118	down
TRINITY_DN3594_c8_g2	62.0473	20.1281	1.62416	1.76623e-118	1.40936e-117	up
TRINITY_DN3593_c1_g1	16.6565	33.9286	-1.02642	2.60053e-118	2.07073e-117	down
TRINITY_DN3092_c3_g2	16.2121	36.2484	-1.16085	3.58201e-118	2.84925e-117	down
TRINITY_DN3142_c0_g1	27.0692	59.2051	-1.12907	4.875e-118	3.86558e-117	down
TRINITY_DN3522_c0_g2	13.9183	50.6139	-1.86255	6.38854e-118	5.06308e-117	down
TRINITY_DN3023_c1_g3	30.4712	7.78133	1.96936	7.55526e-118	5.9846e-117	up
TRINITY_DN3516_c0_g4	18.3948	63.7827	-1.79386	9.52856e-118	7.54374e-117	down
TRINITY_DN3440_c3_g1	12.0413	31.3632	-1.38109	1.06275e-117	8.40498e-117	down
TRINITY_DN3417_c4_g5	8.86433	36.3003	-2.0339	1.08441e-117	8.57181e-117	down
TRINITY_DN3545_c1_g4	4.605	68.4905	-3.89463	1.37262e-117	1.08444e-116	down
TRINITY_DN1727_c0_g1	36.8044	10.0826	1.86801	2.18081e-117	1.72115e-116	up
TRINITY_DN2669_c7_g3	85.1177	35.3294	1.26859	2.81293e-117	2.21887e-116	up
TRINITY_DN2394_c0_g1	26.2635	54.7253	-1.05915	4.5556e-117	3.59165e-116	down
TRINITY_DN3002_c7_g3	41.8702	20.2949	1.04481	4.71947e-117	3.71891e-116	up
TRINITY_DN3575_c5_g2	3.92549	16.5872	-2.07912	5.54181e-117	4.36465e-116	down
TRINITY_DN2637_c1_g6	5.55926	20.0291	-1.84914	7.01536e-117	5.51945e-116	down
TRINITY_DN4472_c0_g1	13.4691	0.876545	3.94168	9.83482e-117	7.72168e-116	up
TRINITY_DN2616_c2_g1	68.0869	191.93	-1.49513	2.0123e-116	1.57911e-115	down
TRINITY_DN3155_c1_g1	20.9483	51.6291	-1.30135	4.8829e-116	3.8278e-115	down
TRINITY_DN2998_c4_g3	3.07465	13.0843	-2.08934	9.51345e-116	7.45392e-115	down
TRINITY_DN3187_c3_g12	82.5732	28.8934	1.51493	1.32173e-115	1.03506e-114	up
TRINITY_DN3633_c0_g1	50.7701	102.559	-1.0144	1.35649e-115	1.06173e-114	down
TRINITY_DN2114_c0_g1	68.3801	30.1698	1.18047	2.32372e-115	1.81691e-114	up
TRINITY_DN2594_c3_g3	21.0277	60.3681	-1.5215	2.84259e-115	2.22147e-114	down
TRINITY_DN3048_c8_g1	25.4859	59.4681	-1.22241	4.75561e-115	3.71266e-114	down
TRINITY_DN2811_c0_g3	5.44759	20.4813	-1.91062	4.78873e-115	3.73659e-114	down
TRINITY_DN3491_c2_g1	15.0695	35.2478	-1.2259	4.86997e-115	3.79803e-114	down
TRINITY_DN2512_c1_g1	34.4488	11.8278	1.54228	5.32109e-115	4.14772e-114	up
TRINITY_DN2695_c0_g2	13.9618	0.0573447	7.92761	1.04122e-114	8.11196e-114	up
TRINITY_DN2929_c1_g1	306.895	44.9174	2.7724	2.3833e-114	1.85489e-113	up
TRINITY_DN2640_c1_g4	3.7356	15.4256	-2.04591	2.73037e-114	2.12283e-113	down
TRINITY_DN3148_c2_g2	33.3925	91.0662	-1.44739	3.59882e-114	2.7966e-113	down
TRINITY_DN3542_c0_g2	49.695	130.019	-1.38755	4.20151e-114	3.26328e-113	down
TRINITY_DN3483_c6_g3	51.9847	130.112	-1.3236	5.97083e-114	4.63511e-113	down
TRINITY_DN3374_c8_g1	10.1201	26.9065	-1.41073	7.08847e-114	5.49991e-113	down
TRINITY_DN3757_c3_g4	16.4378	2.99028	2.45867	1.2941e-113	1.00357e-112	up
TRINITY_DN2950_c3_g5	1.0399	9.14694	-3.13684	1.31906e-113	1.02189e-112	down
TRINITY_DN2918_c2_g1	32.425	67.3515	-1.0546	1.40606e-113	1.08872e-112	down
TRINITY_DN2554_c2_g1	5.43889	16.56	-1.60632	1.45848e-113	1.12874e-112	down
TRINITY_DN2947_c1_g3	5.70958	33.0693	-2.53403	1.56027e-113	1.2069e-112	down
TRINITY_DN3678_c4_g1	17.7906	39.8805	-1.16457	2.69443e-113	2.08314e-112	down
TRINITY_DN2783_c1_g3	112.756	253.79	-1.17044	2.70017e-113	2.0865e-112	down
TRINITY_DN3125_c3_g2	26.4268	60.9288	-1.20513	2.85154e-113	2.20235e-112	down
TRINITY_DN3483_c7_g2	39.5443	11.7964	1.74512	5.32041e-113	4.1008e-112	up
TRINITY_DN3449_c4_g3	0.749442	21.1046	-4.81559	2.27106e-112	1.74602e-111	down
TRINITY_DN3527_c7_g1	40.6098	10.0154	2.01961	3.23862e-112	2.48737e-111	up
TRINITY_DN1580_c0_g1	30.4129	5.78164	2.39513	3.9979e-112	3.06897e-111	up
TRINITY_DN2989_c0_g1	41.5376	83.4784	-1.00698	4.52924e-112	3.47333e-111	down
TRINITY_DN3032_c1_g2	14.6727	32.3052	-1.13863	6.33226e-112	4.85356e-111	down
TRINITY_DN3393_c0_g1	19.9848	53.25	-1.41388	9.10551e-112	6.97215e-111	down
TRINITY_DN2387_c0_g1	22.0374	60.2648	-1.45136	1.25583e-111	9.60628e-111	down
TRINITY_DN1639_c0_g1	17.9913	48.7952	-1.43944	1.54584e-111	1.18187e-110	down
TRINITY_DN3291_c1_g1	4.08478	21.8959	-2.42233	2.07394e-111	1.58483e-110	down
TRINITY_DN1617_c0_g1	95.29	44.6595	1.09336	2.12951e-111	1.62566e-110	up
TRINITY_DN3538_c0_g1	110.754	37.411	1.56582	2.69578e-111	2.05691e-110	up
TRINITY_DN3361_c4_g1	15.5337	40.3685	-1.37783	3.3076e-111	2.52246e-110	down
TRINITY_DN3177_c2_g1	26.5652	64.8626	-1.28785	3.98927e-111	3.04079e-110	down
TRINITY_DN3358_c2_g2	16.521	38.4364	-1.21817	5.33539e-111	4.06481e-110	down
TRINITY_DN2749_c3_g4	19.0446	43.5254	-1.19248	1.09563e-110	8.33456e-110	down
TRINITY_DN3753_c3_g1	321.161	43.2533	2.89241	1.12436e-110	8.54883e-110	up
TRINITY_DN3319_c4_g2	40.3907	4.2953	3.23319	2.06058e-110	1.56281e-109	up
TRINITY_DN2717_c2_g1	0.139478	6.34948	-5.50853	2.12812e-110	1.61322e-109	down
TRINITY_DN2169_c0_g1	29.5036	74.8285	-1.3427	2.58282e-110	1.95693e-109	down
TRINITY_DN2666_c2_g1	16.3193	57.9028	-1.82705	4.57798e-110	3.46687e-109	down
TRINITY_DN2794_c2_g3	4.88377	19.5313	-1.99972	8.19454e-110	6.19948e-109	down
TRINITY_DN3241_c1_g1	49.4914	133.67	-1.43343	8.64672e-110	6.5383e-109	down
TRINITY_DN3531_c5_g4	15.3977	46.4291	-1.59231	1.80193e-109	1.36051e-108	down
TRINITY_DN3047_c2_g1	40.4524	85.271	-1.07583	2.74946e-109	2.0718e-108	down
TRINITY_DN2821_c0_g3	23.5064	63.0494	-1.42343	5.619e-109	4.22988e-108	down
TRINITY_DN2784_c0_g1	38.2611	95.2721	-1.31618	1.04341e-108	7.84677e-108	down
TRINITY_DN3420_c2_g3	8.93583	31.8825	-1.83509	1.45966e-108	1.09717e-107	down
TRINITY_DN2189_c0_g1	25.4977	7.97906	1.67608	3.08743e-108	2.31955e-107	up
TRINITY_DN3744_c0_g1	1.86336	22.8826	-3.61827	3.57808e-108	2.68684e-107	down
TRINITY_DN2141_c0_g1	3.19018	11.8511	-1.89331	4.0989e-108	3.07641e-107	down
TRINITY_DN2866_c1_g4	91.6345	210.722	-1.20138	5.51728e-108	4.13891e-107	down
TRINITY_DN1255_c0_g1	80.835	188.988	-1.22524	6.15719e-108	4.61667e-107	down
TRINITY_DN2623_c0_g1	20.2699	7.25195	1.4829	9.02896e-108	6.76325e-107	up
TRINITY_DN3446_c1_g4	23.8313	61.497	-1.36766	1.21401e-107	9.08915e-107	down
TRINITY_DN3345_c3_g1	14.4908	43.9169	-1.59964	2.41498e-107	1.8054e-106	down
TRINITY_DN3215_c4_g5	15.9935	43.5187	-1.44415	5.10726e-107	3.81434e-106	down
TRINITY_DN1867_c0_g1	17.6051	53.5009	-1.60357	5.44111e-107	4.06168e-106	down
TRINITY_DN3737_c0_g2	46.3574	20.9882	1.14322	6.16126e-107	4.59699e-106	up
TRINITY_DN1996_c0_g2	24.4794	0.342779	6.15815	1.63782e-106	1.219e-105	up
TRINITY_DN1763_c0_g1	53.1099	114.662	-1.11034	2.01368e-106	1.49801e-105	down
TRINITY_DN3056_c2_g1	16.7687	53.1878	-1.66533	2.19119e-106	1.62846e-105	down
TRINITY_DN2758_c1_g3	21.6205	52.4454	-1.27842	2.60197e-106	1.92996e-105	down
TRINITY_DN3245_c1_g1	104.35	216.781	-1.05481	3.86526e-106	2.86558e-105	down
TRINITY_DN3735_c2_g3	30.533	11.7255	1.38072	3.91795e-106	2.90323e-105	up
TRINITY_DN3418_c0_g1	45.6571	98.0591	-1.10281	4.25344e-106	3.15029e-105	down
TRINITY_DN2147_c0_g1	33.7224	71.5644	-1.08554	5.36058e-106	3.96835e-105	down
TRINITY_DN2967_c2_g6	8.01785	26.4117	-1.71989	8.17373e-106	6.04792e-105	down
TRINITY_DN2892_c0_g1	18.6354	45.6691	-1.29318	9.39487e-106	6.94808e-105	down
TRINITY_DN2764_c1_g2	13.1724	32.7447	-1.31374	9.53528e-106	7.04848e-105	down
TRINITY_DN3049_c6_g1	22.3427	48.1332	-1.10723	1.2744e-105	9.41576e-105	down
TRINITY_DN1273_c0_g1	40.8938	16.8416	1.27986	1.40389e-105	1.03674e-104	up
TRINITY_DN3753_c1_g1	264.049	0.555755	8.89214	1.64539e-105	1.2145e-104	up
TRINITY_DN3211_c0_g1	16.5876	44.6383	-1.42818	1.98269e-105	1.46276e-104	down
TRINITY_DN3265_c3_g2	6.99937	26.36	-1.91305	3.16545e-105	2.33308e-104	down
TRINITY_DN3491_c2_g3	12.6218	42.4832	-1.75097	3.71822e-105	2.73916e-104	down
TRINITY_DN3120_c2_g1	17.931	53.8344	-1.58607	3.89583e-105	2.86861e-104	down
TRINITY_DN3630_c3_g1	17.378	38.8802	-1.16177	4.17752e-105	3.07453e-104	down
TRINITY_DN3701_c1_g1	17.0959	59.6	-1.80166	4.37392e-105	3.21595e-104	down
TRINITY_DN3503_c3_g2	17.4714	0.0364595	8.90449	4.66939e-105	3.43153e-104	up
TRINITY_DN2409_c0_g1	29.5059	70.9045	-1.26487	5.40966e-105	3.97364e-104	down
TRINITY_DN1802_c0_g1	3.52222	15.3391	-2.12266	6.16653e-105	4.5252e-104	down
TRINITY_DN2548_c4_g1	7.15224	21.6718	-1.59935	6.53344e-105	4.79214e-104	down
TRINITY_DN3658_c3_g1	31.5363	14.7549	1.09582	6.93107e-105	5.08133e-104	up
TRINITY_DN1741_c0_g1	18.9157	50.6279	-1.42035	1.0691e-104	7.83025e-104	down
TRINITY_DN1477_c0_g1	13.8054	0.255831	5.75389	3.90991e-104	2.86091e-103	up
TRINITY_DN3157_c5_g2	13.8021	43.6657	-1.66162	9.74588e-104	7.12427e-103	down
TRINITY_DN2481_c2_g1	11.9244	29.246	-1.29432	1.16037e-103	8.47823e-103	down
TRINITY_DN3674_c0_g1	12.6134	31.5627	-1.32326	1.26034e-103	9.20426e-103	down
TRINITY_DN1495_c0_g1	62.4666	159.373	-1.35125	1.38062e-103	1.00778e-102	down
TRINITY_DN3276_c2_g1	1.76105	6.99813	-1.99053	4.72368e-103	3.44638e-102	down
TRINITY_DN2506_c1_g3	17.6109	41.1657	-1.22497	4.9494e-103	3.60932e-102	down
TRINITY_DN2594_c4_g3	22.3992	8.30589	1.43124	5.15738e-103	3.75919e-102	up
TRINITY_DN3568_c1_g4	5.38113	23.8292	-2.14675	5.78795e-103	4.21678e-102	down
TRINITY_DN2647_c0_g1	1.54131	10.2153	-2.72851	8.95374e-103	6.51693e-102	down
TRINITY_DN3382_c0_g1	30.6325	91.3628	-1.57654	9.01369e-103	6.55742e-102	down
TRINITY_DN2240_c0_g2	16.5883	3.59952	2.20429	9.17384e-103	6.67072e-102	up
TRINITY_DN2646_c1_g3	10.4875	27.7622	-1.40445	1.20397e-102	8.75046e-102	down
TRINITY_DN2933_c4_g2	25.974	9.70877	1.41971	1.52567e-102	1.10832e-101	up
TRINITY_DN2734_c3_g1	10.7571	27.2572	-1.34135	1.66019e-102	1.20547e-101	down
TRINITY_DN3747_c2_g1	19.4701	41.6964	-1.09866	1.69881e-102	1.23291e-101	down
TRINITY_DN1997_c0_g1	36.1373	16.6997	1.11366	2.81138e-102	2.0394e-101	up
TRINITY_DN1946_c0_g1	134.602	277.028	-1.04133	4.91338e-102	3.55909e-101	down
TRINITY_DN3208_c3_g1	23.2363	98.1689	-2.07889	6.02585e-102	4.35868e-101	down
TRINITY_DN2856_c0_g1	28.0634	13.85	1.01881	6.63831e-102	4.7994e-101	up
TRINITY_DN3465_c3_g2	55.1968	121.991	-1.14412	7.63132e-102	5.5147e-101	down
TRINITY_DN2710_c3_g3	0.61018	17.8751	-4.87257	7.77684e-102	5.61718e-101	down
TRINITY_DN2981_c0_g3	13.3877	5.3585	1.32101	9.70876e-102	7.00926e-101	up
TRINITY_DN2619_c3_g6	17.9929	43.1538	-1.26205	1.21204e-101	8.742e-101	down
TRINITY_DN2049_c0_g1	44.0401	94.1992	-1.0969	1.26684e-101	9.13297e-101	down
TRINITY_DN3553_c1_g1	23.5867	68.8016	-1.54447	1.54047e-101	1.11004e-100	down
TRINITY_DN2958_c1_g3	20.3209	1.01127	4.32872	1.81557e-101	1.3064e-100	up
TRINITY_DN1405_c0_g1	16.4946	3.53221	2.22335	1.87309e-101	1.34715e-100	up
TRINITY_DN3416_c0_g2	63.8099	135.568	-1.08716	2.57143e-101	1.84853e-100	down
TRINITY_DN3675_c4_g1	28.9437	65.5965	-1.18037	4.01218e-101	2.88014e-100	down
TRINITY_DN2669_c3_g1	30.6514	63.3132	-1.04655	4.18209e-101	3.00069e-100	down
TRINITY_DN847_c0_g1	3.75355	24.8901	-2.72924	6.9861e-101	5.00077e-100	down
TRINITY_DN3587_c6_g2	7.06822	2.2157	1.67358	9.9036e-101	7.08247e-100	up
TRINITY_DN1450_c0_g1	102.977	227.059	-1.14074	1.25249e-100	8.94861e-100	down
TRINITY_DN2796_c1_g1	26.964	7.34306	1.87658	2.53024e-100	1.80607e-99	up
TRINITY_DN3270_c0_g1	24.3932	8.48656	1.52323	2.61087e-100	1.86275e-99	up
TRINITY_DN1136_c0_g1	6.73149	33.3929	-2.31054	2.99745e-100	2.13755e-99	down
TRINITY_DN2024_c0_g1	7.25634	28.2433	-1.9606	4.72943e-100	3.3695e-99	down
TRINITY_DN3145_c1_g1	55.6122	24.3192	1.1933	4.93299e-100	3.51122e-99	up
TRINITY_DN1041_c0_g1	37.4734	0.913398	5.35848	4.94348e-100	3.51704e-99	up
TRINITY_DN3485_c0_g2	36.1452	3.35605	3.42897	6.41787e-100	4.56385e-99	up
TRINITY_DN3732_c0_g5	4.5496	20.3835	-2.16359	8.84894e-100	6.28967e-99	down
TRINITY_DN3056_c2_g3	19.4369	63.3944	-1.70555	1.44538e-99	1.02687e-98	down
TRINITY_DN2820_c2_g4	200.834	94.4841	1.08786	1.83241e-99	1.30123e-98	up
TRINITY_DN2246_c0_g1	23.5639	72.9052	-1.62944	1.98511e-99	1.409e-98	down
TRINITY_DN2712_c2_g7	19.8565	42.0446	-1.08231	2.21006e-99	1.56793e-98	down
TRINITY_DN3242_c1_g2	20.2539	49.6412	-1.29334	2.44352e-99	1.73275e-98	down
TRINITY_DN2593_c0_g4	18.7999	56.9804	-1.59974	3.57952e-99	2.53712e-98	down
TRINITY_DN2811_c0_g6	15.233	35.1351	-1.20571	4.02684e-99	2.85285e-98	down
TRINITY_DN2516_c0_g1	55.6854	145.883	-1.38944	4.65213e-99	3.2943e-98	down
TRINITY_DN3682_c5_g1	1.6985	10.7268	-2.65889	4.92581e-99	3.48647e-98	down
TRINITY_DN3381_c4_g2	1.29994	7.55908	-2.53976	5.48406e-99	3.87979e-98	down
TRINITY_DN3570_c2_g1	263.464	115.914	1.18455	5.84468e-99	4.13298e-98	up
TRINITY_DN2829_c3_g1	52.1531	114.258	-1.13147	9.36443e-99	6.61576e-98	down
TRINITY_DN2726_c0_g3	15.6578	0.0001	17.2565	2.14926e-98	1.51699e-97	up
TRINITY_DN2344_c0_g1	10.5588	1.323	2.99657	2.58416e-98	1.82141e-97	up
TRINITY_DN3180_c4_g3	12.8684	32.9207	-1.35517	2.99065e-98	2.10693e-97	down
TRINITY_DN2554_c1_g4	21.5792	53.2766	-1.30386	4.21617e-98	2.96619e-97	down
TRINITY_DN2866_c1_g3	23.6751	53.3223	-1.17137	8.58455e-98	6.03106e-97	down
TRINITY_DN2670_c1_g1	32.0486	66.6842	-1.05708	9.59271e-98	6.73311e-97	down
TRINITY_DN2780_c0_g1	23.184	9.63623	1.26659	1.0707e-97	7.50828e-97	up
TRINITY_DN2881_c0_g1	37.2374	8.57583	2.1184	1.15476e-97	8.09028e-97	up
TRINITY_DN3741_c1_g4	1.75556	8.12628	-2.21066	1.33618e-97	9.35697e-97	down
TRINITY_DN3406_c1_g1	20.7522	69.8054	-1.75007	1.69993e-97	1.18987e-96	down
TRINITY_DN2191_c0_g1	62.5579	27.3359	1.1944	1.99151e-97	1.39332e-96	up
TRINITY_DN2661_c2_g4	4.7418	24.3807	-2.36223	2.47753e-97	1.73255e-96	down
TRINITY_DN1137_c0_g1	33.6897	14.6391	1.20248	2.61304e-97	1.82648e-96	up
TRINITY_DN1794_c0_g1	0.363563	9.39911	-4.69225	3.83213e-97	2.67737e-96	down
TRINITY_DN3607_c1_g2	2.93939	19.7325	-2.74698	7.80126e-97	5.44293e-96	down
TRINITY_DN3214_c1_g3	8.88579	27.5071	-1.63023	9.25616e-97	6.45504e-96	down
TRINITY_DN2648_c3_g3	29.3078	61.1583	-1.06126	1.00632e-96	7.01465e-96	down
TRINITY_DN3053_c0_g2	9.30533	35.7283	-1.94094	1.40324e-96	9.76788e-96	down
TRINITY_DN3106_c2_g3	17.3126	54.2732	-1.64842	1.50169e-96	1.04485e-95	down
TRINITY_DN796_c0_g1	0.549366	11.6041	-4.40072	1.74417e-96	1.21244e-95	down
TRINITY_DN774_c0_g1	25.2143	90.8656	-1.84949	1.90263e-96	1.32199e-95	down
TRINITY_DN1671_c0_g1	24.1354	79.4052	-1.71808	2.22868e-96	1.54783e-95	down
TRINITY_DN945_c0_g1	43.6169	16.6235	1.39166	2.89635e-96	2.01061e-95	up
TRINITY_DN3445_c3_g1	11.9309	34.902	-1.5486	3.0128e-96	2.09048e-95	down
TRINITY_DN3371_c4_g1	30.7774	13.4007	1.19956	3.0658e-96	2.12628e-95	up
TRINITY_DN3651_c1_g1	28.7621	61.5469	-1.09752	3.97258e-96	2.75266e-95	down
TRINITY_DN2321_c0_g1	36.6043	89.4561	-1.28917	5.37747e-96	3.72273e-95	down
TRINITY_DN3112_c2_g1	2.35087	13.0763	-2.47569	5.3954e-96	3.73344e-95	down
TRINITY_DN3512_c0_g2	18.43	67.7901	-1.87901	5.7082e-96	3.94809e-95	down
TRINITY_DN3373_c0_g3	184.443	456.23	-1.30659	6.14213e-96	4.24627e-95	down
TRINITY_DN3252_c1_g1	28.1245	68.4179	-1.28255	6.56138e-96	4.53198e-95	down
TRINITY_DN1761_c0_g1	38.0123	18.3797	1.04836	7.33475e-96	5.05925e-95	up
TRINITY_DN3116_c1_g1	16.4454	90.3026	-2.45708	1.04342e-95	7.19384e-95	down
TRINITY_DN3590_c6_g3	5.09008	16.5631	-1.70221	1.08759e-95	7.49498e-95	down
TRINITY_DN2848_c1_g1	53.556	19.1508	1.48364	1.25358e-95	8.63496e-95	up
TRINITY_DN3124_c0_g2	11.1452	36.1666	-1.69823	1.31768e-95	9.07235e-95	down
TRINITY_DN2521_c4_g2	62.3967	128.755	-1.04509	2.6894e-95	1.85084e-94	down
TRINITY_DN3074_c5_g2	1.06526	19.6723	-4.20689	2.83308e-95	1.94884e-94	down
TRINITY_DN3222_c1_g2	13.3725	39.3114	-1.55567	3.16638e-95	2.17712e-94	down
TRINITY_DN1360_c0_g1	60.6656	144.083	-1.24795	3.62626e-95	2.49219e-94	down
TRINITY_DN1500_c0_g1	21.3532	72.7759	-1.76901	4.55397e-95	3.12835e-94	down
TRINITY_DN2584_c1_g1	38.9969	82.7661	-1.08568	6.39051e-95	4.38599e-94	down
TRINITY_DN2528_c1_g1	28.1177	66.4555	-1.24091	8.95649e-95	6.14431e-94	down
TRINITY_DN2997_c2_g7	32.3882	12.6881	1.35199	1.07255e-94	7.35459e-94	up
TRINITY_DN3311_c2_g1	13.8326	35.8909	-1.37555	1.44783e-94	9.9234e-94	down
TRINITY_DN3647_c1_g4	3.47218	13.0317	-1.90811	1.53083e-94	1.04875e-93	down
TRINITY_DN3732_c0_g3	24.1954	54.0647	-1.15995	1.79847e-94	1.23155e-93	down
TRINITY_DN3383_c0_g1	20.8481	10.3676	1.00783	1.81606e-94	1.24304e-93	up
TRINITY_DN3034_c3_g1	18.1841	38.8403	-1.09487	2.11599e-94	1.44768e-93	down
TRINITY_DN1879_c0_g1	8.91467	35.1952	-1.98113	2.17472e-94	1.48719e-93	down
TRINITY_DN2591_c0_g1	10.2183	31.4774	-1.62316	3.19771e-94	2.18381e-93	down
TRINITY_DN3525_c4_g1	11.0807	23.1083	-1.06036	3.28408e-94	2.24178e-93	down
TRINITY_DN3286_c2_g4	30.3012	12.573	1.26905	1.10036e-93	7.49103e-93	up
TRINITY_DN2921_c2_g4	10.4944	44.9179	-2.09767	1.30606e-93	8.88342e-93	down
TRINITY_DN2551_c1_g4	16.5468	33.5983	-1.02184	1.32333e-93	8.99688e-93	down
TRINITY_DN3209_c2_g1	35.029	74.3444	-1.08568	1.33332e-93	9.06073e-93	down
TRINITY_DN889_c0_g1	16.353	0.884666	4.20828	1.48922e-93	1.01111e-92	up
TRINITY_DN3069_c3_g1	16.7296	62.1042	-1.89229	1.78068e-93	1.20792e-92	down
TRINITY_DN2735_c1_g1	3.11378	31.5997	-3.34317	4.06872e-93	2.75753e-92	down
TRINITY_DN3041_c0_g1	124.459	250.929	-1.0116	4.52178e-93	3.06184e-92	down
TRINITY_DN2429_c0_g2	18.4469	44.4954	-1.27027	4.68807e-93	3.17303e-92	down
TRINITY_DN3215_c4_g1	3.53042	8.77951	-1.3143	7.94924e-93	5.37309e-92	down
TRINITY_DN1487_c0_g1	25.0859	9.66661	1.3758	9.62408e-93	6.49936e-92	up
TRINITY_DN3364_c5_g2	18.448	0.0001	17.4931	1.3313e-92	8.9866e-92	up
TRINITY_DN3731_c1_g1	20.698	44.9731	-1.11957	2.69681e-92	1.8196e-91	down
TRINITY_DN3575_c5_g8	37.2634	10.9292	1.76957	4.2551e-92	2.86591e-91	up
TRINITY_DN3753_c2_g6	228.151	0.0001	21.1216	4.3116e-92	2.90267e-91	up
TRINITY_DN2890_c1_g1	54.7142	115.147	-1.0735	4.42484e-92	2.97759e-91	down
TRINITY_DN3245_c2_g4	23.3993	0.130267	7.48885	5.85345e-92	3.93719e-91	up
TRINITY_DN2959_c0_g1	15.5318	50.3829	-1.69771	6.69069e-92	4.49634e-91	down
TRINITY_DN2576_c1_g4	17.7238	41.5207	-1.22814	7.57003e-92	5.08503e-91	down
TRINITY_DN3398_c2_g2	44.0474	89.8347	-1.02821	1.5224e-91	1.02083e-90	down
TRINITY_DN3071_c0_g2	15.7468	33.8151	-1.10261	1.63905e-91	1.09857e-90	down
TRINITY_DN1263_c0_g1	6.31539	23.8488	-1.91697	1.86249e-91	1.24778e-90	down
TRINITY_DN3653_c2_g6	14.7295	0.0791214	7.54043	2.15885e-91	1.44569e-90	up
TRINITY_DN2784_c3_g1	18.2388	36.4959	-1.00073	2.25829e-91	1.51161e-90	down
TRINITY_DN2493_c1_g1	10.8991	32.5737	-1.5795	3.18421e-91	2.13044e-90	down
TRINITY_DN2534_c3_g3	18.314	5.9896	1.61242	3.37576e-91	2.25761e-90	up
TRINITY_DN3133_c2_g1	19.3795	47.6992	-1.29943	1.03746e-90	6.92597e-90	down
TRINITY_DN1704_c0_g2	80.0625	33.2458	1.26795	1.17483e-90	7.83962e-90	up
TRINITY_DN3573_c1_g3	8.96114	70.9548	-2.98515	1.24989e-90	8.33318e-90	down
TRINITY_DN3240_c3_g2	5.17175	28.9392	-2.4843	1.579e-90	1.05135e-89	down
TRINITY_DN3682_c4_g1	132.774	300.65	-1.17911	1.73131e-90	1.15226e-89	down
TRINITY_DN2755_c0_g3	15.8609	40.9341	-1.36783	1.82693e-90	1.21536e-89	down
TRINITY_DN3328_c3_g3	15.4788	126.048	-3.0256	2.44121e-90	1.6233e-89	down
TRINITY_DN2724_c3_g1	27.7384	56.3163	-1.02167	2.44592e-90	1.62572e-89	down
TRINITY_DN3189_c0_g6	0.390938	10.1689	-4.70109	2.77293e-90	1.84226e-89	down
TRINITY_DN1138_c0_g1	9.14641	46.6596	-2.3509	5.00171e-90	3.3201e-89	down
TRINITY_DN2815_c0_g2	33.3882	16.1612	1.0468	5.00763e-90	3.32257e-89	up
TRINITY_DN2960_c0_g4	36.2595	16.539	1.13249	6.92596e-90	4.59136e-89	up
TRINITY_DN3537_c1_g1	5.47244	18.8517	-1.78444	1.26209e-89	8.35569e-89	down
TRINITY_DN3570_c1_g2	158.072	398.292	-1.33324	2.08275e-89	1.37829e-88	down
TRINITY_DN3087_c3_g1	19.4851	40.911	-1.07012	2.25428e-89	1.49115e-88	down
TRINITY_DN3432_c0_g1	4.23336	12.8983	-1.60731	2.27963e-89	1.50726e-88	down
TRINITY_DN2829_c2_g2	1.7426	35.4333	-4.34579	2.87403e-89	1.89861e-88	down
TRINITY_DN2277_c0_g1	33.2654	76.8688	-1.20837	3.04609e-89	2.0114e-88	down
TRINITY_DN3344_c1_g2	21.303	47.2294	-1.14863	3.30543e-89	2.1817e-88	down
TRINITY_DN3639_c2_g4	21.3676	0.0001	17.7051	4.31254e-89	2.84519e-88	up
TRINITY_DN2754_c1_g2	26.5559	81.7995	-1.62306	4.53077e-89	2.98656e-88	down
TRINITY_DN3272_c1_g3	20.1217	46.3331	-1.20329	4.60357e-89	3.03192e-88	down
TRINITY_DN1362_c0_g1	126.281	263.972	-1.06375	4.71864e-89	3.10635e-88	down
TRINITY_DN3556_c3_g3	24.7022	5.25361	2.23326	4.93683e-89	3.24717e-88	up
TRINITY_DN2848_c3_g1	24.4454	9.28507	1.39658	7.13561e-89	4.68933e-88	up
TRINITY_DN3528_c1_g1	62.4034	149.991	-1.26518	8.14495e-89	5.35033e-88	down
TRINITY_DN3531_c1_g1	9.80253	31.2051	-1.67056	1.12915e-88	7.41403e-88	down
TRINITY_DN3001_c0_g1	25.7295	11.7906	1.12579	1.62466e-88	1.06537e-87	up
TRINITY_DN3207_c1_g1	8.82108	29.0555	-1.71978	2.05319e-88	1.34522e-87	down
TRINITY_DN3141_c1_g7	4.82792	62.7363	-3.69983	2.42191e-88	1.58612e-87	down
TRINITY_DN3707_c0_g1	5.07705	17.3028	-1.76894	4.62749e-88	3.02663e-87	down
TRINITY_DN3741_c0_g4	12.6958	31.7719	-1.3234	6.33591e-88	4.14225e-87	down
TRINITY_DN3753_c2_g5	83.6393	1.3386	5.96538	6.34948e-88	4.14933e-87	up
TRINITY_DN3022_c2_g1	7.46878	16.1992	-1.11698	6.46928e-88	4.2258e-87	down
TRINITY_DN3084_c0_g3	79.6241	14.7103	2.43638	8.13957e-88	5.31227e-87	up
TRINITY_DN3452_c2_g2	28.3301	10.9417	1.37249	1.01234e-87	6.60418e-87	up
TRINITY_DN2912_c1_g4	12.7206	0.536852	4.56649	1.21885e-87	7.94795e-87	up
TRINITY_DN2037_c0_g1	5.83765	25.1074	-2.10465	1.41086e-87	9.19213e-87	down
TRINITY_DN3569_c6_g1	3.52795	13.7486	-1.96239	2.37183e-87	1.54332e-86	down
TRINITY_DN2816_c0_g1	62.0144	157.539	-1.34503	2.76725e-87	1.79984e-86	down
TRINITY_DN2704_c2_g1	20.6013	5.96104	1.7891	3.61705e-87	2.35155e-86	up
TRINITY_DN1891_c0_g1	44.926	19.9558	1.17074	4.02007e-87	2.61244e-86	up
TRINITY_DN2247_c0_g1	3.2348	17.0629	-2.39911	4.07769e-87	2.64875e-86	down
TRINITY_DN3259_c1_g1	37.9079	89.6795	-1.24228	4.21215e-87	2.73492e-86	down
TRINITY_DN2251_c0_g1	49.5616	18.3921	1.43014	4.41467e-87	2.86519e-86	up
TRINITY_DN3403_c1_g1	22.6711	47.5935	-1.06991	9.44742e-87	6.12627e-86	down
TRINITY_DN2701_c2_g1	4.86868	33.0455	-2.76285	1.14046e-86	7.39225e-86	down
TRINITY_DN1563_c0_g1	12.8954	45.3146	-1.81312	2.39994e-86	1.55228e-85	down
TRINITY_DN3709_c3_g5	37.024	78.1925	-1.07857	2.64271e-86	1.70858e-85	down
TRINITY_DN3406_c3_g2	23.7954	57.3272	-1.26854	6.0219e-86	3.88999e-85	down
TRINITY_DN1805_c0_g1	13.4975	53.4681	-1.98599	1.015e-85	6.55107e-85	down
TRINITY_DN1775_c0_g1	33.7647	10.5871	1.67321	1.13541e-85	7.32199e-85	up
TRINITY_DN3049_c5_g1	0.673668	13.448	-4.31921	2.10688e-85	1.35809e-84	down
TRINITY_DN3616_c0_g1	503.302	1205.71	-1.26038	2.33532e-85	1.50471e-84	down
TRINITY_DN3475_c0_g3	9.88844	31.9051	-1.68997	3.35406e-85	2.15928e-84	down
TRINITY_DN3686_c9_g1	16.0288	46.5771	-1.53895	4.17537e-85	2.68687e-84	down
TRINITY_DN1148_c0_g1	1.15075	15.766	-3.77618	4.59373e-85	2.95484e-84	down
TRINITY_DN2731_c1_g1	14.3022	34.5873	-1.274	4.92597e-85	3.1672e-84	down
TRINITY_DN3280_c6_g6	1.74495	10.1467	-2.53976	4.98727e-85	3.20526e-84	down
TRINITY_DN2555_c4_g1	22.7914	8.87389	1.36085	6.21702e-85	3.99221e-84	up
TRINITY_DN2085_c0_g1	14.9344	0.286317	5.70488	8.67757e-85	5.56753e-84	up
TRINITY_DN1099_c0_g1	13.3971	1.68832	2.98826	8.73092e-85	5.59939e-84	up
TRINITY_DN2684_c3_g4	36.9215	13.7015	1.43013	1.00928e-84	6.47009e-84	up
TRINITY_DN3191_c2_g4	49.8442	99.7811	-1.00134	1.0801e-84	6.92114e-84	down
TRINITY_DN3289_c3_g4	15.0467	42.6433	-1.50287	1.11899e-84	7.16732e-84	down
TRINITY_DN2902_c4_g2	31.4372	70.4857	-1.16486	1.88901e-84	1.20892e-83	down
TRINITY_DN2245_c0_g1	1.14882	14.778	-3.68523	2.65674e-84	1.69953e-83	down
TRINITY_DN2676_c0_g1	15.9232	39.0317	-1.29352	3.51925e-84	2.25033e-83	down
TRINITY_DN3742_c0_g2	20.9284	50.1303	-1.26022	3.89029e-84	2.48654e-83	down
TRINITY_DN3476_c2_g1	58.8532	26.988	1.1248	4.08355e-84	2.60896e-83	up
TRINITY_DN2775_c1_g2	20.1212	3.59748	2.48365	4.81239e-84	3.07073e-83	up
TRINITY_DN3633_c2_g6	47.261	20.9257	1.17537	5.01015e-84	3.19558e-83	up
TRINITY_DN3564_c2_g1	26.9306	13.2934	1.01854	6.69231e-84	4.2667e-83	up
TRINITY_DN3054_c0_g3	14.1973	30.9566	-1.12463	7.05213e-84	4.49422e-83	down
TRINITY_DN2205_c0_g1	12.9964	4.64678	1.4838	7.08845e-84	4.51546e-83	up
TRINITY_DN3590_c2_g1	9.77039	30.2469	-1.6303	8.32872e-84	5.30331e-83	down
TRINITY_DN1465_c0_g1	57.8194	124.177	-1.10278	8.53311e-84	5.43117e-83	down
TRINITY_DN3157_c2_g1	16.7566	54.5158	-1.70194	8.82993e-84	5.61773e-83	down
TRINITY_DN2083_c0_g1	6.23339	26.3345	-2.07887	9.64643e-84	6.13463e-83	down
TRINITY_DN3136_c2_g3	20.7329	47.611	-1.19937	1.18831e-83	7.55071e-83	down
TRINITY_DN2035_c0_g2	34.8878	73.6316	-1.0776	1.65772e-83	1.05202e-82	down
TRINITY_DN3050_c1_g7	0.288342	4.50455	-3.96553	2.58423e-83	1.63794e-82	down
TRINITY_DN2898_c1_g5	12.3287	37.8081	-1.61667	2.73036e-83	1.72984e-82	down
TRINITY_DN923_c0_g1	20.6886	79.0318	-1.9336	2.9741e-83	1.88347e-82	down
TRINITY_DN3630_c2_g1	13.899	44.5063	-1.67903	3.83399e-83	2.42702e-82	down
TRINITY_DN947_c0_g1	7.17289	44.3238	-2.62745	4.6243e-83	2.92364e-82	down
TRINITY_DN2828_c0_g2	15.5653	44.0715	-1.50151	5.72018e-83	3.61349e-82	down
TRINITY_DN3412_c0_g1	54.2311	26.5794	1.02881	6.27028e-83	3.95934e-82	up
TRINITY_DN2989_c0_g3	4.89472	18.9055	-1.94951	8.42573e-83	5.31596e-82	down
TRINITY_DN2734_c1_g1	7.90789	31.5203	-1.99492	1.15746e-82	7.29959e-82	down
TRINITY_DN3117_c4_g1	20.7638	50.6857	-1.28751	1.39678e-82	8.80521e-82	down
TRINITY_DN3153_c0_g2	15.9403	45.9911	-1.52868	1.4259e-82	8.98506e-82	down
TRINITY_DN2827_c2_g2	14.0294	3.81471	1.87881	1.84737e-82	1.16361e-81	up
TRINITY_DN1079_c0_g1	11.0464	0.231066	5.57913	2.23974e-82	1.41016e-81	up
TRINITY_DN2520_c4_g1	8.76378	31.5838	-1.84956	3.46736e-82	2.18037e-81	down
TRINITY_DN3585_c1_g1	82.5258	36.2019	1.18878	4.16558e-82	2.61725e-81	up
TRINITY_DN3234_c0_g1	56.2437	14.72	1.93391	4.61413e-82	2.89788e-81	up
TRINITY_DN3277_c2_g5	8.95214	28.5996	-1.67569	4.99157e-82	3.13233e-81	down
TRINITY_DN2779_c0_g2	26.4067	10.2427	1.3663	5.37338e-82	3.37053e-81	up
TRINITY_DN2965_c2_g1	21.6314	44.7251	-1.04796	8.5285e-82	5.343e-81	down
TRINITY_DN1196_c0_g1	51.072	119.766	-1.22962	1.009e-81	6.31606e-81	down
TRINITY_DN2554_c0_g1	70.5315	141.951	-1.00906	1.24306e-81	7.76836e-81	down
TRINITY_DN2792_c0_g1	18.9877	1.23981	3.93687	1.42294e-81	8.88882e-81	up
TRINITY_DN3633_c2_g9	23.1869	8.2683	1.48765	1.56756e-81	9.78821e-81	up
TRINITY_DN2670_c2_g1	20.1484	40.7485	-1.01608	1.8506e-81	1.15461e-80	down
TRINITY_DN2693_c3_g1	9.35606	28.125	-1.58788	2.06212e-81	1.28605e-80	down
TRINITY_DN2166_c0_g1	2.13588	7.70967	-1.85184	2.19431e-81	1.36793e-80	down
TRINITY_DN3196_c1_g4	19.6446	40.5594	-1.0459	2.46836e-81	1.53813e-80	down
TRINITY_DN3251_c2_g1	12.8268	43.7477	-1.77005	2.46883e-81	1.5378e-80	down
TRINITY_DN3704_c1_g3	20.6577	57.764	-1.48349	2.5768e-81	1.60439e-80	down
TRINITY_DN2690_c4_g3	4.94237	16.8038	-1.76551	2.68935e-81	1.67309e-80	down
TRINITY_DN2674_c2_g5	51.7913	25.067	1.04692	2.78538e-81	1.73212e-80	up
TRINITY_DN2911_c0_g1	9.92847	38.5427	-1.95681	2.90663e-81	1.80678e-80	down
TRINITY_DN1552_c0_g2	10.3445	1.04045	3.31358	3.96975e-81	2.4646e-80	up
TRINITY_DN2582_c2_g1	10.1016	28.752	-1.50908	4.56308e-81	2.8318e-80	down
TRINITY_DN3739_c0_g1	26.3568	66.3441	-1.33179	4.59511e-81	2.85051e-80	down
TRINITY_DN3554_c2_g1	8.3597	45.43	-2.44212	4.95852e-81	3.07469e-80	down
TRINITY_DN1124_c0_g1	1.21119	14.0726	-3.5384	5.47908e-81	3.39609e-80	down
TRINITY_DN1909_c0_g1	6.68539	0.826018	3.01677	6.50321e-81	4.02922e-80	up
TRINITY_DN2848_c4_g6	19.4067	50.8287	-1.38909	8.77522e-81	5.43025e-80	down
TRINITY_DN3168_c0_g1	9.88585	2.01682	2.29328	9.80433e-81	6.06461e-80	up
TRINITY_DN2536_c0_g1	3.99323	16.3834	-2.03661	1.0468e-80	6.47251e-80	down
TRINITY_DN2618_c1_g3	1.4279	29.1302	-4.35055	1.23375e-80	7.62533e-80	down
TRINITY_DN1032_c0_g1	1.18344	32.0502	-4.75927	2.59289e-80	1.6006e-79	down
TRINITY_DN3657_c4_g4	4.18157	22.2253	-2.41009	2.90564e-80	1.79221e-79	down
TRINITY_DN3311_c1_g1	6.0873	14.1516	-1.21709	3.09055e-80	1.90471e-79	down
TRINITY_DN3059_c1_g1	8.25101	33.181	-2.00772	3.33771e-80	2.05619e-79	down
TRINITY_DN3254_c3_g2	8.369	33.7552	-2.01198	3.48766e-80	2.1477e-79	down
TRINITY_DN3721_c0_g1	24.595	51.8008	-1.07461	4.39228e-80	2.70148e-79	down
TRINITY_DN2419_c0_g1	8.17821	0.340745	4.58502	4.60436e-80	2.83077e-79	up
TRINITY_DN3468_c0_g7	25.8695	7.73886	1.74106	5.06561e-80	3.11308e-79	up
TRINITY_DN3499_c1_g6	3.93827	19.5818	-2.31388	5.26841e-80	3.2364e-79	down
TRINITY_DN3693_c1_g2	9.78941	34.1568	-1.80288	5.95459e-80	3.65496e-79	down
TRINITY_DN3576_c5_g1	26.7035	55.2762	-1.04963	8.10964e-80	4.96969e-79	down
TRINITY_DN1412_c0_g1	19.5332	44.287	-1.18095	9.83909e-80	6.02465e-79	down
TRINITY_DN2521_c2_g3	7.30587	26.0469	-1.83398	1.13403e-79	6.94106e-79	down
TRINITY_DN2172_c0_g1	71.8646	149.677	-1.0585	1.74877e-79	1.06951e-78	down
TRINITY_DN3053_c0_g8	3.39414	31.4672	-3.21273	1.89393e-79	1.15735e-78	down
TRINITY_DN1109_c0_g1	3.88088	31.9327	-3.04058	2.10422e-79	1.28534e-78	down
TRINITY_DN2883_c0_g2	6.39627	31.369	-2.29404	2.27233e-79	1.38747e-78	down
TRINITY_DN2823_c4_g2	16.1421	2.93252	2.46062	4.3695e-79	2.66584e-78	up
TRINITY_DN3196_c0_g1	30.5624	85.9136	-1.49113	6.13929e-79	3.74408e-78	down
TRINITY_DN3743_c2_g3	12.2192	40.5236	-1.72961	9.29824e-79	5.66602e-78	down
TRINITY_DN3746_c3_g2	9.70024	30.726	-1.66337	1.02359e-78	6.23488e-78	down
TRINITY_DN1026_c0_g1	3.42785	34.1472	-3.31639	1.47796e-78	8.99171e-78	down
TRINITY_DN1313_c0_g1	6.1832	19.7351	-1.67433	1.77923e-78	1.08202e-77	down
TRINITY_DN3144_c0_g1	38.7794	82.2277	-1.08433	2.34079e-78	1.42297e-77	down
TRINITY_DN1167_c0_g1	55.9924	119.311	-1.09142	2.81002e-78	1.70752e-77	down
TRINITY_DN3343_c1_g6	15.0712	33.6779	-1.16001	3.70862e-78	2.25266e-77	down
TRINITY_DN3208_c0_g2	41.8325	96.4535	-1.20521	3.74561e-78	2.27422e-77	down
TRINITY_DN3640_c4_g3	25.7803	56.8441	-1.14074	6.06203e-78	3.67185e-77	down
TRINITY_DN3020_c4_g1	17.0051	36.5969	-1.10576	6.61301e-78	4.00399e-77	down
TRINITY_DN1280_c1_g1	105.964	42.5062	1.31782	7.21411e-78	4.36619e-77	up
TRINITY_DN895_c0_g1	11.0075	0.0001	16.7481	8.90054e-78	5.38472e-77	up
TRINITY_DN1514_c0_g1	45.809	16.2247	1.49744	1.61356e-77	9.74626e-77	up
TRINITY_DN1749_c0_g1	13.3919	0.152482	6.45658	1.61824e-77	9.77063e-77	up
TRINITY_DN3470_c1_g1	22.8357	60.0741	-1.39545	1.7221e-77	1.03936e-76	down
TRINITY_DN3308_c2_g2	26.3909	58.3736	-1.14528	2.08411e-77	1.25685e-76	down
TRINITY_DN1964_c0_g1	14.6375	47.1809	-1.68853	2.39836e-77	1.44521e-76	down
TRINITY_DN2497_c2_g1	10.7801	1.20997	3.15533	2.96095e-77	1.78351e-76	up
TRINITY_DN3261_c1_g7	4.70273	18.8849	-2.00566	3.98111e-77	2.3961e-76	down
TRINITY_DN3146_c3_g4	14.871	5.25193	1.50158	4.10919e-77	2.4722e-76	up
TRINITY_DN2497_c2_g2	11.6752	2.22946	2.38869	4.45336e-77	2.6782e-76	up
TRINITY_DN2785_c0_g5	0.163458	5.00231	-4.9356	4.81068e-77	2.89194e-76	down
TRINITY_DN3324_c1_g1	20.5039	47.0764	-1.19911	4.99364e-77	2.99955e-76	down
TRINITY_DN2652_c2_g4	22.8937	63.7378	-1.4772	7.04852e-77	4.23051e-76	down
TRINITY_DN3118_c6_g3	2.35628	10.3988	-2.14183	9.21036e-77	5.52367e-76	down
TRINITY_DN3419_c2_g2	21.3095	75.6628	-1.82809	1.01111e-76	6.06145e-76	down
TRINITY_DN3657_c2_g1	13.7057	46.6644	-1.76755	1.03375e-76	6.19472e-76	down
TRINITY_DN2379_c0_g1	28.393	13.2086	1.10406	1.17588e-76	7.04364e-76	up
TRINITY_DN3473_c5_g1	14.8332	46.2493	-1.6406	1.30168e-76	7.79416e-76	down
TRINITY_DN3018_c5_g1	40.7451	82.879	-1.02438	1.45853e-76	8.72985e-76	down
TRINITY_DN3683_c7_g1	14.8792	5.25801	1.50071	1.60414e-76	9.59765e-76	up
TRINITY_DN2502_c0_g1	6.11906	30.0214	-2.29461	2.11926e-76	1.26746e-75	down
TRINITY_DN2652_c2_g3	57.1301	116.394	-1.0267	6.43138e-76	3.83882e-75	down
TRINITY_DN2519_c0_g2	36.571	85.4163	-1.22381	7.74135e-76	4.61892e-75	down
TRINITY_DN3687_c0_g1	0.283397	10.3986	-5.19742	9.00833e-76	5.37275e-75	down
TRINITY_DN2601_c0_g1	11.1883	63.4734	-2.50416	1.05487e-75	6.28901e-75	down
TRINITY_DN2715_c3_g1	7.03669	20.9023	-1.57069	1.14761e-75	6.83921e-75	down
TRINITY_DN1898_c0_g1	42.5253	86.3028	-1.02108	1.16379e-75	6.9329e-75	down
TRINITY_DN3686_c2_g1	29.1506	9.94778	1.55108	1.31948e-75	7.85725e-75	up
TRINITY_DN3271_c2_g3	20.6962	5.32183	1.95937	2.08501e-75	1.24013e-74	up
TRINITY_DN2838_c4_g1	20.5463	43.4372	-1.08005	2.15276e-75	1.27992e-74	down
TRINITY_DN2990_c2_g2	10.3411	52.5055	-2.34408	3.37508e-75	2.00429e-74	down
TRINITY_DN3132_c1_g6	8.92491	32.2815	-1.8548	4.18585e-75	2.48285e-74	down
TRINITY_DN3275_c1_g1	14.875	52.1198	-1.80894	4.92375e-75	2.91825e-74	down
TRINITY_DN2875_c1_g1	15.1232	33.4641	-1.14585	7.04306e-75	4.16946e-74	down
TRINITY_DN3254_c1_g1	1.06464	9.35885	-3.13597	7.88597e-75	4.66664e-74	down
TRINITY_DN3412_c1_g2	27.1359	67.6268	-1.31739	9.33614e-75	5.52048e-74	down
TRINITY_DN1946_c0_g2	64.8138	30.8286	1.07203	9.79123e-75	5.78732e-74	up
TRINITY_DN2845_c0_g6	100.891	202.298	-1.00368	1.00366e-74	5.93005e-74	down
TRINITY_DN3607_c0_g3	0.745151	6.54887	-3.13564	1.03927e-74	6.13806e-74	down
TRINITY_DN1746_c0_g1	10.176	26.674	-1.39026	1.46357e-74	8.64067e-74	down
TRINITY_DN328_c0_g1	14.7607	0.601001	4.61825	1.68843e-74	9.96433e-74	up
TRINITY_DN2975_c3_g1	24.9929	6.6396	1.91235	2.41953e-74	1.42734e-73	up
TRINITY_DN3179_c3_g8	14.1757	30.3483	-1.0982	2.57396e-74	1.51785e-73	down
TRINITY_DN3555_c1_g1	5.10079	20.1337	-1.98082	2.86276e-74	1.68684e-73	down
TRINITY_DN3581_c3_g4	21.4018	61.5875	-1.52491	3.41823e-74	2.01335e-73	down
TRINITY_DN2805_c4_g1	20.5958	49.4951	-1.26494	3.73421e-74	2.19861e-73	down
TRINITY_DN886_c0_g1	9.48894	0.873375	3.44157	3.79828e-74	2.23547e-73	up
TRINITY_DN1930_c0_g1	1.51555	12.258	-3.0158	4.79232e-74	2.81723e-73	down
TRINITY_DN3714_c2_g4	4.04555	20.7629	-2.3596	5.71631e-74	3.35911e-73	down
TRINITY_DN1649_c0_g1	20.5702	1.46736	3.80926	6.35481e-74	3.72998e-73	up
TRINITY_DN3476_c4_g1	17.8782	37.5624	-1.07109	6.40014e-74	3.75513e-73	down
TRINITY_DN3313_c5_g1	3.3013	12.2325	-1.88961	7.8474e-74	4.60249e-73	down
TRINITY_DN2029_c0_g1	18.3986	50.7032	-1.46248	8.52488e-74	4.9979e-73	down
TRINITY_DN2259_c0_g1	7.7502	27.5041	-1.82734	8.99484e-74	5.26935e-73	down
TRINITY_DN2832_c3_g2	15.4388	7.61272	1.02008	8.99675e-74	5.26844e-73	up
TRINITY_DN2670_c2_g5	8.21315	1.50169	2.45135	1.24488e-73	7.28713e-73	up
TRINITY_DN1743_c0_g1	15.7401	50.3157	-1.67657	1.40265e-73	8.20745e-73	down
TRINITY_DN2548_c1_g1	18.3719	77.0977	-2.06919	1.58647e-73	9.2795e-73	down
TRINITY_DN3673_c1_g1	86.4712	196.91	-1.18724	1.63624e-73	9.56695e-73	down
TRINITY_DN1675_c0_g1	19.134	51.3826	-1.42514	1.80003e-73	1.05124e-72	down
TRINITY_DN3674_c0_g14	11.2838	26.0981	-1.20969	2.74335e-73	1.59908e-72	down
TRINITY_DN3691_c1_g2	23.8522	61.635	-1.36963	3.43358e-73	1.99987e-72	down
TRINITY_DN1427_c0_g1	9.53829	40.7783	-2.096	4.08711e-73	2.3796e-72	down
TRINITY_DN3207_c1_g4	13.7968	45.2038	-1.7121	4.10567e-73	2.38948e-72	down
TRINITY_DN3344_c1_g1	17.7635	3.06622	2.53438	4.54264e-73	2.64278e-72	up
TRINITY_DN2184_c0_g1	12.8411	2.8995	2.14689	5.59511e-73	3.25259e-72	up
TRINITY_DN1377_c0_g1	1.01125	12.5388	-3.63219	5.82101e-73	3.38261e-72	down
TRINITY_DN3688_c1_g7	4.59251	24.0121	-2.3864	6.24724e-73	3.6289e-72	down
TRINITY_DN2374_c0_g1	5.70465	19.474	-1.77134	7.01778e-73	4.07494e-72	down
TRINITY_DN2136_c0_g1	10.144	29.5818	-1.54408	9.27727e-73	5.37869e-72	down
TRINITY_DN3155_c3_g1	3.19374	11.9628	-1.90524	9.83957e-73	5.70034e-72	down
TRINITY_DN2659_c2_g1	6.88212	29.6573	-2.10746	1.09112e-72	6.31874e-72	down
TRINITY_DN2320_c0_g1	13.2172	30.1002	-1.18736	1.16652e-72	6.75282e-72	down
TRINITY_DN1147_c0_g1	19.6028	0.0001	17.5807	1.27156e-72	7.35804e-72	up
TRINITY_DN1941_c0_g1	29.3713	59.1579	-1.01016	1.50962e-72	8.73227e-72	down
TRINITY_DN2920_c0_g1	42.5545	93.5215	-1.13599	1.66839e-72	9.64702e-72	down
TRINITY_DN2691_c0_g2	7.68909	27.9101	-1.8599	2.19472e-72	1.26855e-71	down
TRINITY_DN3410_c1_g5	8.25719	23.5598	-1.5126	2.22528e-72	1.28573e-71	down
TRINITY_DN3115_c1_g1	11.2172	0.0952415	6.87991	2.28671e-72	1.32072e-71	up
TRINITY_DN3017_c0_g4	8.91025	38.1917	-2.09972	2.98913e-72	1.72443e-71	down
TRINITY_DN2782_c0_g5	8.5173	32.211	-1.91908	3.0978e-72	1.78645e-71	down
TRINITY_DN2364_c0_g1	18.1464	51.2514	-1.49791	4.63369e-72	2.67014e-71	down
TRINITY_DN2487_c0_g2	38.0056	83.4299	-1.13435	4.74112e-72	2.73101e-71	down
TRINITY_DN2611_c0_g1	15.3589	32.0969	-1.06336	5.15684e-72	2.96934e-71	down
TRINITY_DN3097_c1_g1	31.6284	12.6951	1.31695	5.56931e-72	3.20563e-71	up
TRINITY_DN2938_c0_g5	91.4337	204.281	-1.15976	7.83233e-72	4.50307e-71	down
TRINITY_DN3471_c0_g1	7.90646	38.739	-2.29268	7.9997e-72	4.59755e-71	down
TRINITY_DN2542_c4_g2	3.68598	15.5834	-2.07989	8.43667e-72	4.84685e-71	down
TRINITY_DN3003_c0_g8	11.8384	3.21035	1.88267	9.71835e-72	5.57894e-71	up
TRINITY_DN3268_c1_g1	19.9487	7.1345	1.48341	1.04243e-71	5.98192e-71	up
TRINITY_DN3401_c2_g1	83.3258	208.389	-1.32244	2.08359e-71	1.1943e-70	down
TRINITY_DN3599_c1_g5	26.8423	60.052	-1.16171	2.23425e-71	1.27969e-70	down
TRINITY_DN1372_c0_g1	19.9967	2.80785	2.83223	2.50769e-71	1.43577e-70	up
TRINITY_DN409_c0_g1	0.253189	14.3492	-5.82461	2.63795e-71	1.50977e-70	down
TRINITY_DN459_c0_g1	24.0971	50.1546	-1.05752	3.15333e-71	1.8027e-70	down
TRINITY_DN3434_c1_g1	20.3213	48.916	-1.26732	3.15633e-71	1.80374e-70	down
TRINITY_DN3098_c1_g1	32.6046	11.1281	1.55087	3.57063e-71	2.03973e-70	up
TRINITY_DN3654_c1_g5	24.5027	52.6302	-1.10295	3.8966e-71	2.22426e-70	down
TRINITY_DN3621_c5_g2	24.3934	52.5587	-1.10744	4.87951e-71	2.78114e-70	down
TRINITY_DN3654_c2_g1	10.4855	3.08291	1.76603	6.05536e-71	3.45003e-70	up
TRINITY_DN3497_c0_g2	1.70181	8.93748	-2.3928	6.51753e-71	3.71196e-70	down
TRINITY_DN2955_c0_g1	7.12679	17.3733	-1.28555	6.94866e-71	3.95601e-70	down
TRINITY_DN1673_c0_g1	5.85578	23.3153	-1.99335	7.67879e-71	4.37005e-70	down
TRINITY_DN2972_c2_g7	17.7269	44.3048	-1.32152	1.05675e-70	6.01178e-70	down
TRINITY_DN3259_c2_g4	562.709	231.631	1.28056	1.24571e-70	7.08409e-70	up
TRINITY_DN3533_c1_g1	2.42401	20.8749	-3.1063	1.50427e-70	8.55126e-70	down
TRINITY_DN2808_c1_g1	13.9828	38.7855	-1.47186	1.69727e-70	9.64477e-70	down
TRINITY_DN3214_c1_g6	6.63309	23.393	-1.81832	2.0501e-70	1.1641e-69	down
TRINITY_DN2652_c2_g1	17.5326	39.902	-1.18642	2.38425e-70	1.35334e-69	down
TRINITY_DN2456_c3_g3	0.833987	150.243	-7.49306	3.20226e-70	1.81561e-69	down
TRINITY_DN3252_c0_g1	1.32173	9.38034	-2.82721	3.5682e-70	2.02158e-69	down
TRINITY_DN3504_c2_g2	28.0491	67.5961	-1.26899	4.20162e-70	2.37867e-69	down
TRINITY_DN2873_c1_g4	12.8572	27.6141	-1.10283	4.5704e-70	2.58648e-69	down
TRINITY_DN3666_c4_g3	3.66907	15.9801	-2.12279	4.8704e-70	2.7542e-69	down
TRINITY_DN3657_c4_g1	0.578122	11.0146	-4.25189	5.23633e-70	2.96003e-69	down
TRINITY_DN3618_c0_g2	9.78661	23.5113	-1.26447	6.07916e-70	3.43391e-69	down
TRINITY_DN1736_c0_g1	14.8002	0.529312	4.80535	8.2524e-70	4.65976e-69	up
TRINITY_DN1708_c0_g1	16.613	38.7274	-1.22104	8.40682e-70	4.74519e-69	down
TRINITY_DN1506_c0_g1	6.67886	18.1903	-1.44549	8.85255e-70	4.99492e-69	down
TRINITY_DN3590_c4_g2	18.8994	8.67254	1.12381	9.23989e-70	5.21153e-69	up
TRINITY_DN3637_c1_g1	9.54516	23.7845	-1.31718	1.19529e-69	6.73671e-69	down
TRINITY_DN3594_c8_g1	6.17397	30.8729	-2.32207	1.41339e-69	7.9571e-69	down
TRINITY_DN2710_c3_g2	1.47536	18.844	-3.67496	1.41548e-69	7.96589e-69	down
TRINITY_DN2805_c1_g1	37.5315	75.7446	-1.01304	2.1283e-69	1.19597e-68	down
TRINITY_DN3244_c1_g1	45.9061	95.6651	-1.05931	2.96226e-69	1.66337e-68	down
TRINITY_DN3685_c0_g2	3.03322	11.492	-1.92171	4.15293e-69	2.33022e-68	down
TRINITY_DN2986_c4_g7	1.16176	6.77865	-2.54469	4.33696e-69	2.43258e-68	down
TRINITY_DN2624_c3_g1	19.4282	42.0615	-1.11435	4.53056e-69	2.53929e-68	down
TRINITY_DN2691_c1_g2	7.76755	23.8176	-1.6165	4.73485e-69	2.65281e-68	down
TRINITY_DN2294_c0_g1	0.320003	5.39386	-4.07516	4.88361e-69	2.73515e-68	down
[truncated: 2,653 more rows]
